# Supplementary material for: Proximity proteomics identifies septins and PAK2 as decisive regulators of actomyosin-mediated expulsion of von Willebrand factor
Source: PubMed Central journal article supplement — Blood. 2022 Dec 26;141(8):930–44. doi: 10.1182/blood.2022017419 (PMC10023740; doi:10.1182/blood.2022017419), 2022-12-26
Supplement: BLOOD_BLD-2022-017419-mmc1.pdf [file BLOOD_BLD-2022-017419-mmc1.pdf]

## Supplementary Materials for

*Proximity proteomics identifies septins and PAK2 as decisive regulators of actomyosin mediated expulsion of von Willebrand factor.*

---

\*Corresponding author. Email: [t.nightingale@qmul.ac.uk](mailto:t.nightingale@qmul.ac.uk)

### **This PDF file includes:**

Supplemental materials and methods

Figs. S1 to S6

Tables S1 to S4

## **Supplemental materials and methods**

### **Cell culture and nucleofection**

Pooled donor human umbilical vein endothelial cells (HUVEC) (Promocell, Cat: 12203) cultured and used between passage 3 and 6. Unless otherwise stated HUVEC were passaged and maintained in M199 (Life Technologies) free from antibiotics but supplemented with 10 U/mL heparin (Cat: H3149), 20% FCS (Labtech, Cat: FCS-SA) and 30 µg/ml endothelial cell growth supplement (Sigma Aldrich). Plasmids or siRNA were transfected into HUVECs by nucleofection using the program U-001 (Lonza). Cells were typically assayed 24 h (all plasmids) or 48 h (eGFP-SEPT6) after transfection.

### **Pharmacological inhibitors**

Pharmacological inhibitors and suppliers used in this study are as follows. IPA-3 (Sigma-Aldrich I2285), FRAX-486 (Tocris, Cat: 5190), FCF (Sigma-Aldrich, Cat: 32974) and NVS PAK1.1 (Tocris, Cat: 6132).

### **Primary antibodies for immunofluorescence**

Mouse (Ms) anti-PAK2 (Thermo Fisher Scientific, Cat: MA5-15527, dilution 1:200).  
Rabbit (Rb) SEPT7 (Tecan, Cat: 18991, dilution 1:500)  
Rb anti-SEPT2 (Cambridge Biosciences, Cat: HPA018481, dilution 1:200)  
Rb VWF (Dako, Cat: A0082, dilution 1:10,000)  
Rb anti NMIIa (Abcam, Cat: ab138498 1:200)  
Sheep anti-VWF (Bio-Rad, Cat AHP062, dilution, 1 in 10,000)  
Rb anti-Myosin 1c (Abcam, Cat: ab194828, dilution 1 in 200)

### **Antibodies for immunoblotting**

Myosin Light Chain 2 Antibody Sampler Kit (Cell Signalling, Cat: 9776, dilutions 1:1000).  
Rb anti PAK2 (Cell Signalling, Cat: 2608, dilution 1:1000)  
Ms anti- $\beta$ -tubulin (Sigma-Aldrich, Cat T5201, dilution 1:3000)  
Rb anti-SEPT7 (Tecan, Cat: 18991, dilution 1:1000)  
Rb anti-SEPT2 (Cambridge Biosciences, Cat: HPA018481, dilution 1:1000)  
Rb-SEPT9 (Atlas Antibodies, Cat: HPA042564, dilution 1:1000)  
Rt anti-GFP (Chromotek, Cat:3H9, dilution 1:1000)  
Rb anti-cofilin (Cell Signalling, Cat: 5175, dilution 1:1000)  
Rb anti-phospho-cofilin (Ser3) (Cell Signalling, Cat: 3313, dilution 1:1000)  
Horse radish peroxidase conjugated goat (Gt) anti-Ms-IgG (Dako, Cat: P0447, dilution 1:5000)  
Gt anti-Rb IRDye 680RD (Licor, Cat: 92668071, dilution 1:15,000)  
Donkey anti-Rb IRDye 800CW (Licor, Cat: 92632211, dilution 1:15,000)  
Gt anti-Ms 680 (Invitrogen, Cat: A21057, dilution 1:15,000)  
Gt anti-rat HRP (Invitrogen, Cat: 31470, dilution 1:5000)

### **Live-cell imaging of HUVEC**

For imaging septin dynamics  $1 \times 10^6$  cells were transfected with 3 µg of SEPT6-eGFP P.sel.lum.mCherry and seeded into four compartment cell viewing dishes. 48 hours later cells were stimulated with PMA (100 ng/mL) and continuous Z-stack (0.5-6 µm steps) images acquired using a Zeiss LSM 800 confocal microscope (63X objective lens). The same procedure

was followed for imaging actin dynamics with the following exceptions. 3  $\mu\text{g}$  of LifeAct-GFP was used in combination with P.sel.lum.mCherry and cells were imaged 24 hours after nucleofection. For inhibitor studies cells were pre-incubated in 1  $\mu\text{M}$  of FRAX486 or 50  $\mu\text{M}$  FCF for at least 30 minutes.

Defining the exact timings of septin ring recruitment was particularly challenging because in our experimental conditions, fluorescently tagged septin subunits only incorporate in the hetero-oligomers following a transient burst of expression. This is because recombinant septins do not immediately incorporate into the pre-existing septin filaments but require *de novo* assembly of hetero-oligomers (Sellin et al., 2011). Further, increased expression level and ability to form homopolymers resulted in lentiviral-derived SEPT7-mCherry aggregating into thick amyloid-like filaments. The only way to image septin ring formation in live endothelial cells was to incorporate eGFP tagged monomers into the heterooligomeric rings during formation. SEPT6 is the only septin that we managed to image at exocytosis in live cells (endogenous SEPT7 is present on SEPT6-eGFP rings, as observed using fixed cells). There remains the possibility that septin ring function in cells expressing sufficient SEPT6-eGFP are perturbed in some manner in terms of dynamics and function. The impact of SEPT6 depletion on exit site size was the opposite to SEPT7, indicating that SEPT6 may play alternate or redundant roles in exocytosis. This may explain why SEPT6 is suitable candidate for allowing septin ring imaging. Despite this, we can conclude that SEPT2/6/7/9 rings are recruited post fusion and have an important role in VWF exocytosis through aiding efficient functioning of the actomyosin ring.

## Supplementary Figures

**Fig. S1. Optimization of the fluorescent dot blot.** (A) Example blot. VWF was detected with an anti-VWF antibody, signal amplified using a biotin conjugated antibody and 800 IRDye labelled streptavidin. (B) No edge effects were determined (C) No significant differences were detected when the fluorescent dot blot was compared to a conventional VWF ELISA.

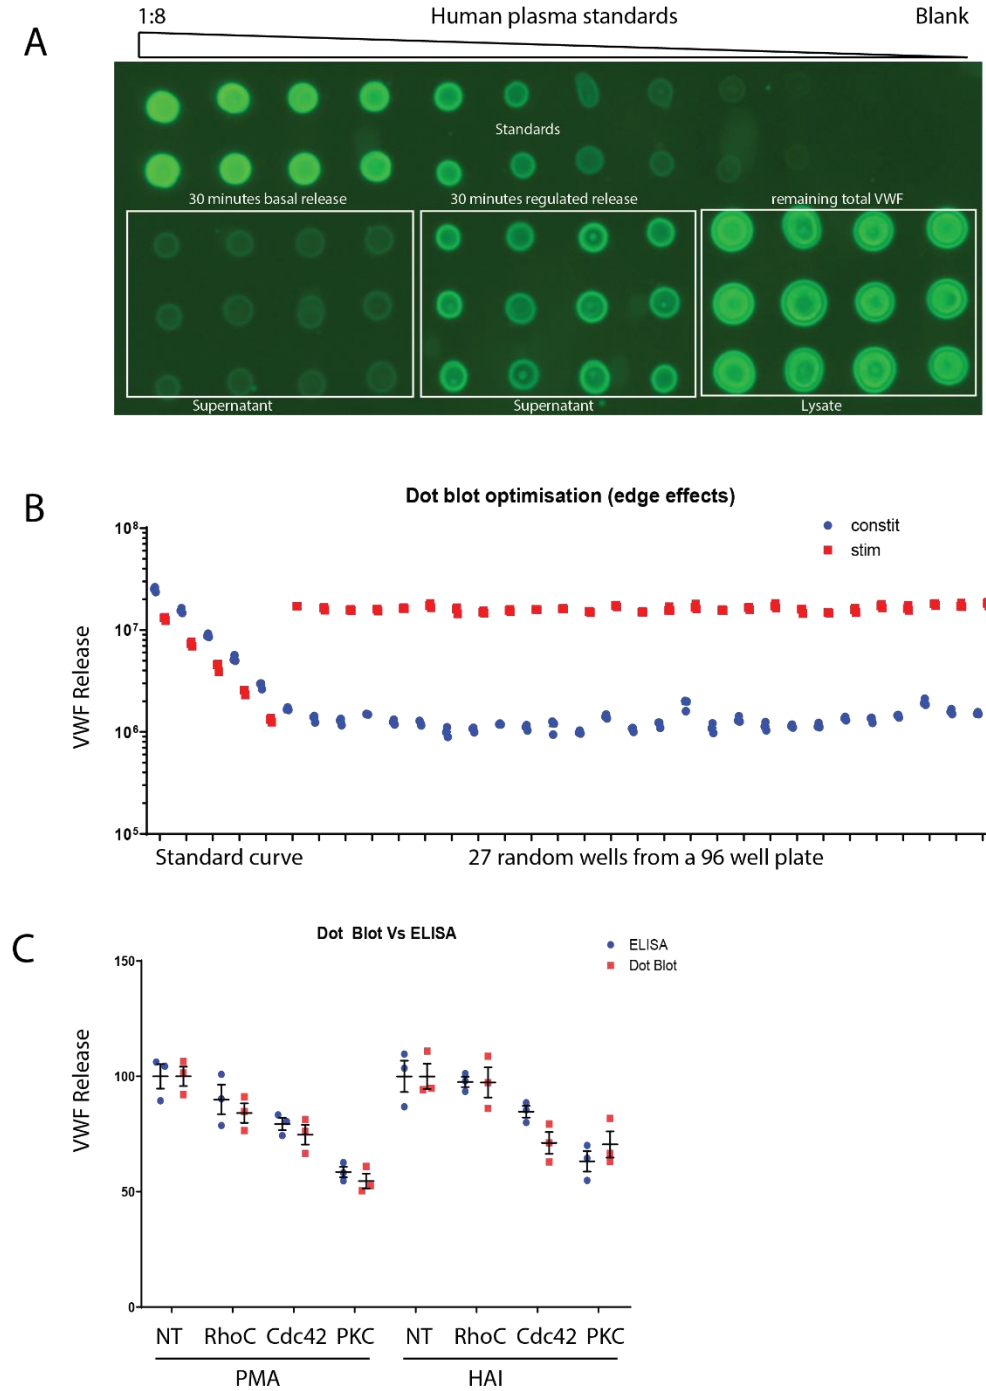

**Fig. S2 The effect of siRNA mediated depletion of PAK isoforms and Septin paralogs on VWF release and exit site size** The transfected cells were stimulated with PMA (A/C) or a combination of Histamine/Adrenalin/IBMX (B/D) and either fixed in the presence of VWF antibody for analysis by confocal microscopy to determine exit site size (C/D) or the supernatants taken to determine the amount of VWF secreted by fluorescent dot blot analysis (A/B).

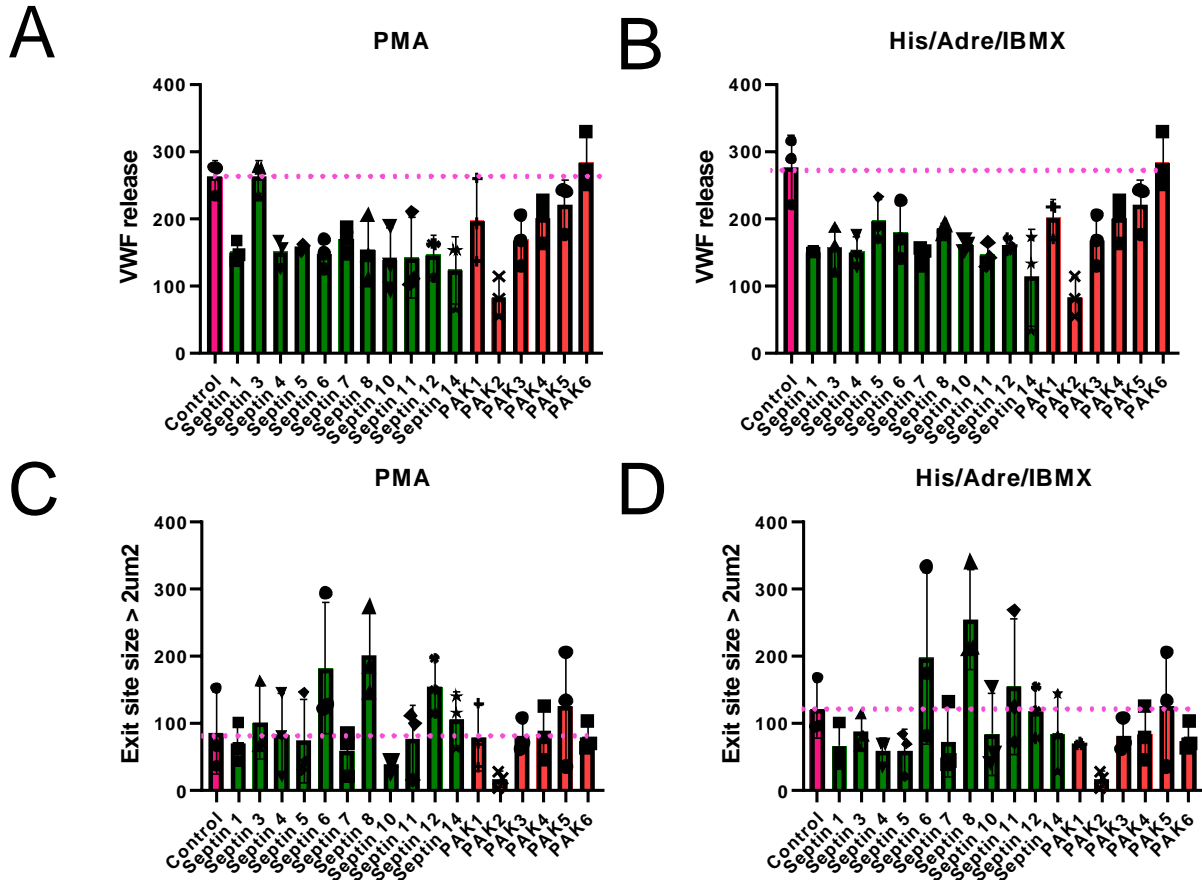

**Fig. S3. The effect of PAK2 silencing on VWF release is not mediated by ERK1/2 or cofilin activity.** (A) Schematic of known PAK2 signalling pathways (B) PAK2 and SEPT7 expression was silenced using siRNA oligonucleotides and cell lysates probed for SEPT7, PAK2, tubulin, ERK1/2, phosphor-ERK1/2 (thr185/tyr187), cofilin and phospho-cofilin (s3) (C-D) Knock down efficiency of SEPT7 and PAK2 siRNA as determined by densitometry. (E) PAK2 KD and SEPT7 KD does not inhibit PMA stimulated ERK1/2 phosphorylation at thr185/tyr187 residues. (F) Less phosphor-cofilin (s3) was detected in PAK2 and SEPT7 KD lysates under basal conditions. PAK2 KD and SEPT7 KD does not inhibit PMA stimulated cofilin phosphorylation at s3.

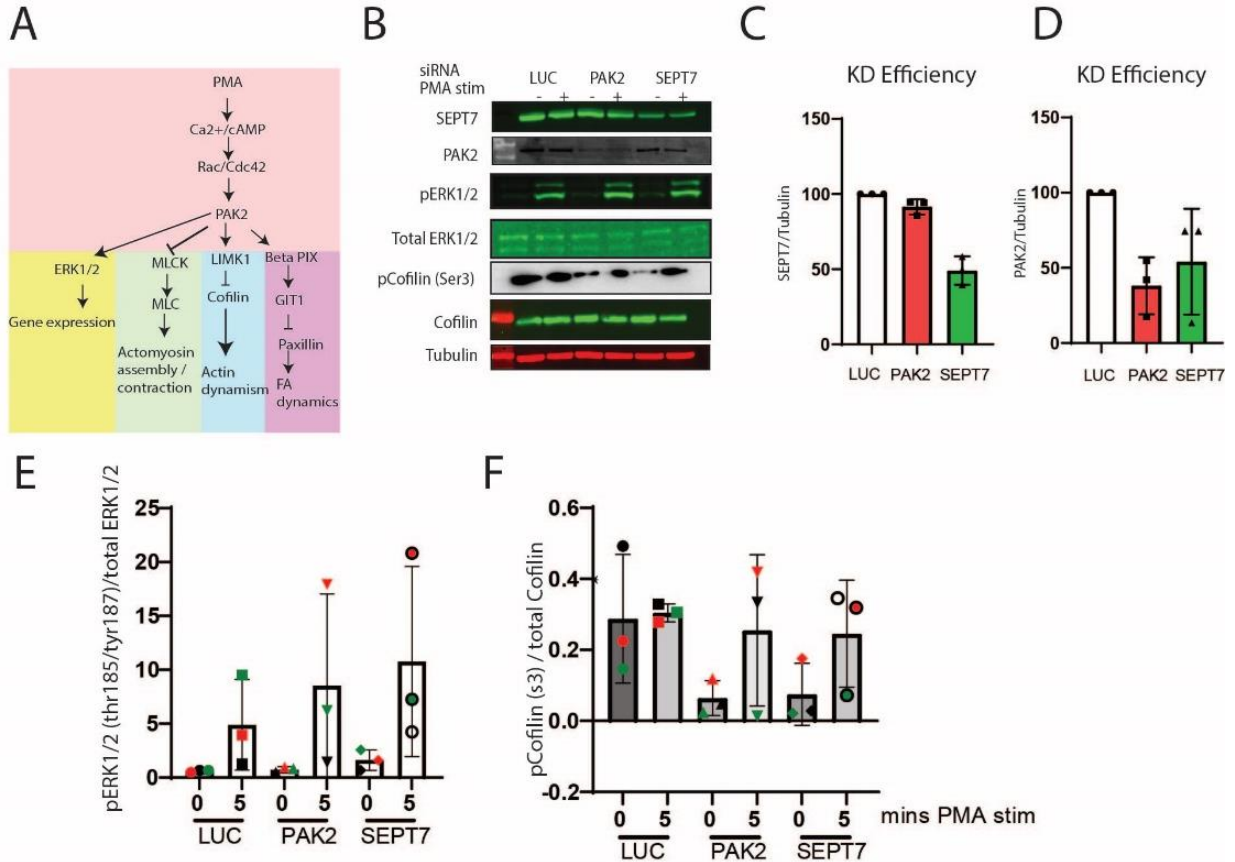

**Fig. S4. Optimization of imaging fluorescently tagged septin subunits in endothelial cells**

(A) Lentiviral-derived SEPT7-mCherry forms thick filaments, uncharacteristic of the endogenous staining. (B) Lentiviral derived SEPT6-eGFP forms thick aggregates. (C) Imaging of plasmid transfected (eGFP-SEPT6) 48 hours after a transient burst of expression illustrates cytoskeletal-like staining of eGFP-SEPT6 (green) and colocalisation with actin (white). (D) eGFP-SEPT6 behaves like the endogenous protein, forming rings in response to actin polymerisation with CCE. All scale bars are 10  $\mu$ m. (E) Live cell confocal imaging of HUVEC transfected with eGFP-SEPT6 (green) and P.sel.lum.mCherry (magenta) prior to stimulation with PMA (100 ng/mL) in the presence of the actin poison, cytochalasin E (1  $\mu$ M). Scale bar 1  $\mu$ m.

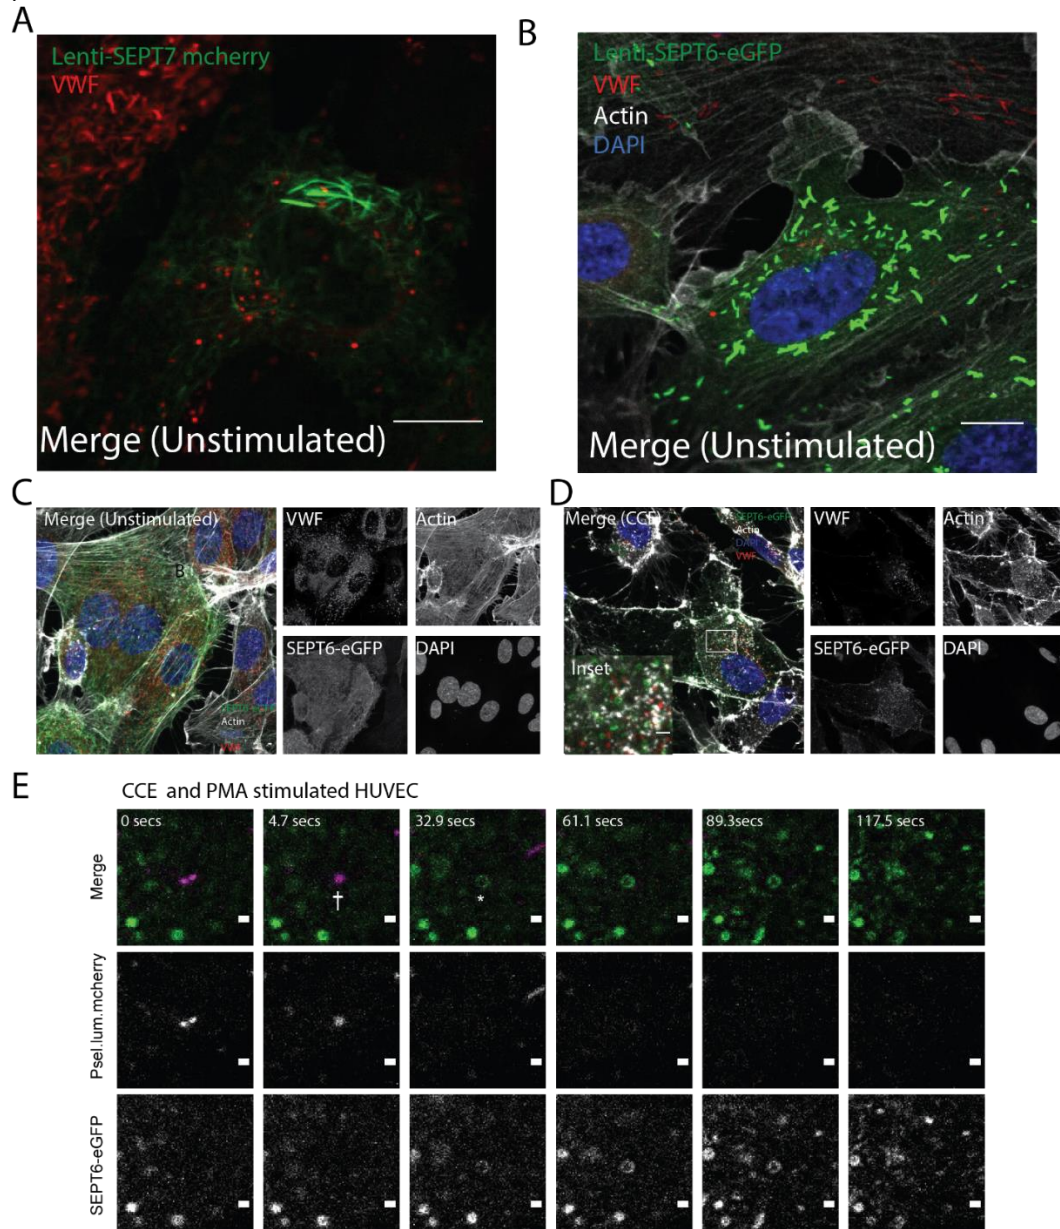

**Fig. S5 Pharmacological regulation of PAK2 and SEPT7 perturbs actin ring kinetics during WPB exocytosis** (A) HUVEC were exposed to increasing concentration of the septin stabilising small molecule, FCF. FCF inhibited VWF release in a dose dependent fashion. One way ANOVA with Dunnett's post hoc test. (B) WPB fusion was quantified by change in morphology (rod>round) and loss of mCherry signal. HUVEC were pre-treated with low dose concentrations of FRAX486 (1  $\mu$ M) and FCF (50  $\mu$ M) for 30 minutes before stimulation with PMA (100 ng/mL). The pan-PAK inhibitor FRAX486 reduced WPB fusion events ( $*p<0.05$ ), while FCF had no effect ( $ns=p>0.05$ ). One way ANOVA with Dunnett's post hoc test (C) Quantification of WPB fusion events in which LifeAct-GFP was recruited as a ring. (D) Quantification of the duration of LifeAct-GFP signal encapsulating fused WPBs. Control: 64 events from 13 cells. FRAX486: 24 events from 18 cells. FCF: 37 events 23 cells. ( $*p<0.05$ ) One way ANOVA with Dunnett's post hoc test. (E) Frequency distribution of the duration of actin ring dependent exocytic events. In control cells, every event lasted less than 60 secs. Inhibition of septin and PAK2 resulted in some events lasting as long as 160s and 100s respectively.

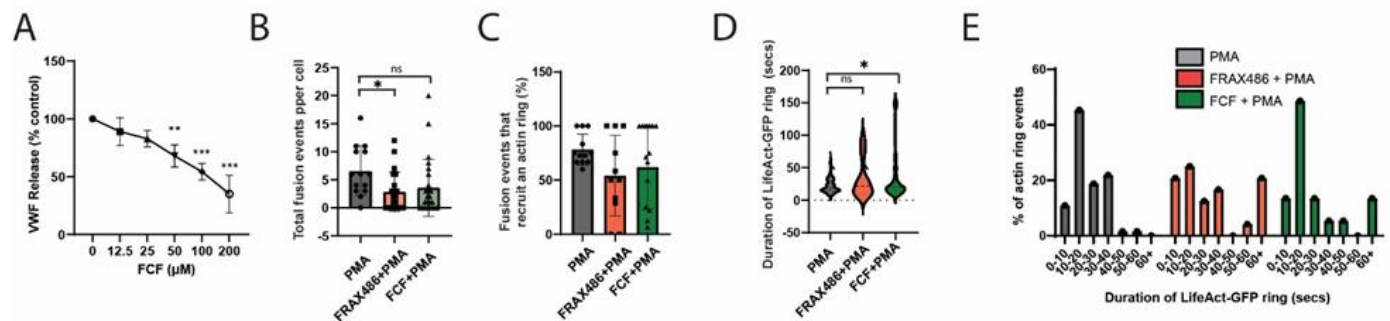



**Fig. S6 Actin ring formation is septin independent and SEPT7 depletion reduces efficiency of VWF string release.** HUVEC were depleted of SEPT7 using siRNA and actin ring formation assessed by immunofluorescence **(A)** siRNA transfected HUVEC were stimulated with PMA (100 ng/mL) and fixed after ten minutes. Confocal microscopy images (0.5  $\mu$ m Z stacks) were acquired using identical settings. Scale bar 10  $\mu$ m. Inset: Actin rings (magenta) could be identified in cells with minimal SEPT7 signal (green). **(B)** Western blotting detected a band at 51 kDA and demonstrated a knockdown efficiency of approx. 70% (three independent experiments). **(C)** The number of actin rings per cell was quantified. 32 images over three experiments. **(D)** Quantification of the number of VWF strings (per cell) released from HUVEC under static conditions. ns= $p>0.05$ , \* $p<0.05$ , \*\* $p<0.01$  unpaired two tailed t test. **(E)** Quantification of the length of VWF strings ( $\mu$ m). Control: 321 strings. SEPT7 KD 114 strings. **(F)** Representative images of VWF staining in LUC (left panel) and SEPT7 KD (left panel) HUVEC. Data presented as the mean from each independent experiment (n=3). Scale bar 10  $\mu$ m. **(G)** Densitometric values for confirmatory immunoblotting performed on SEPT2/7/9 depleted HUVEC.

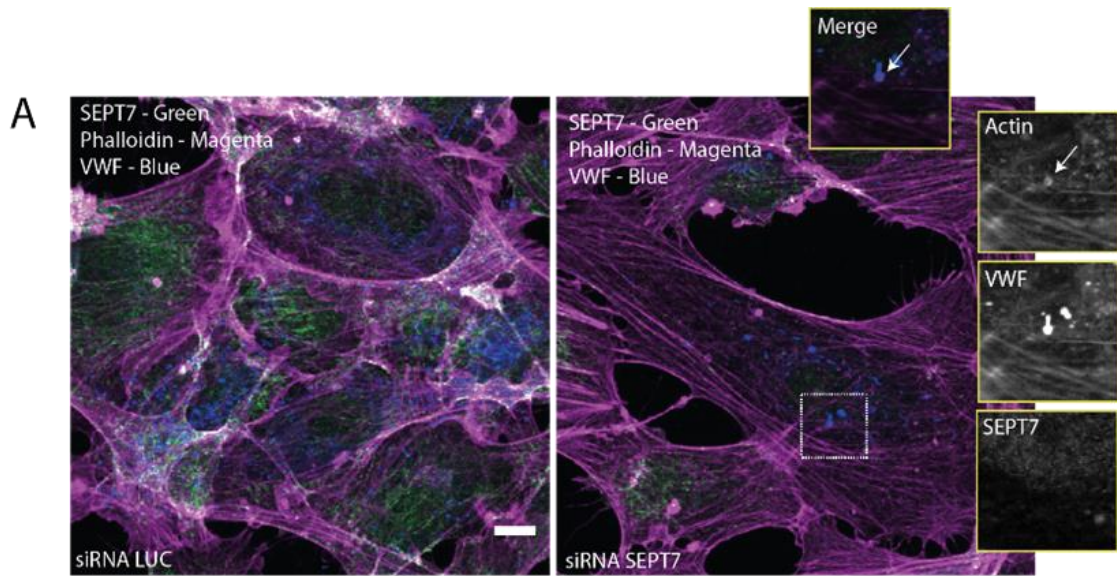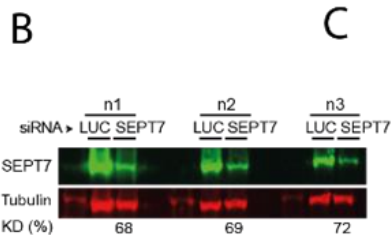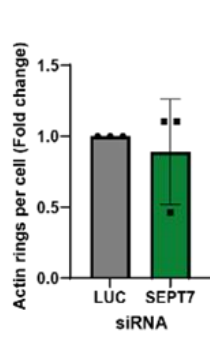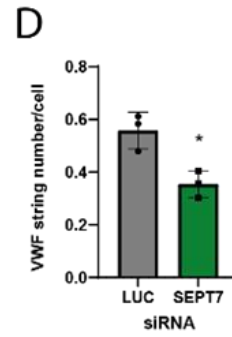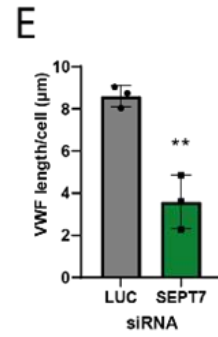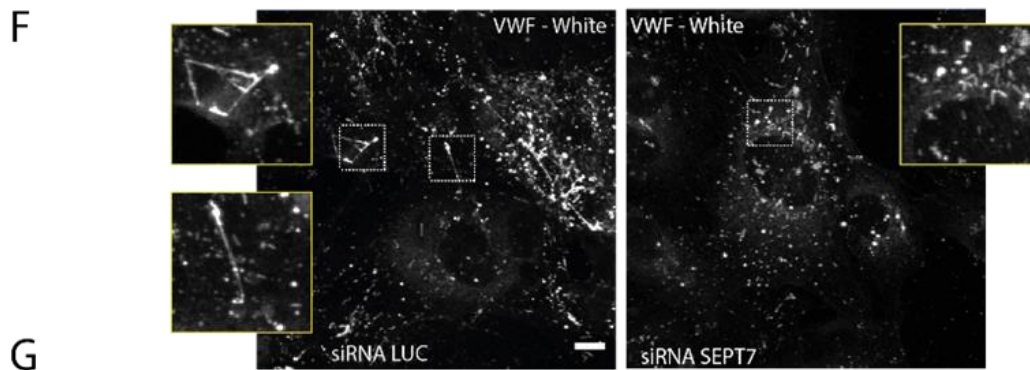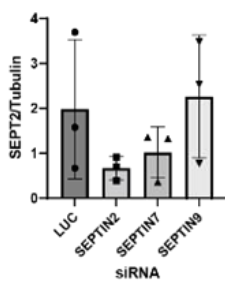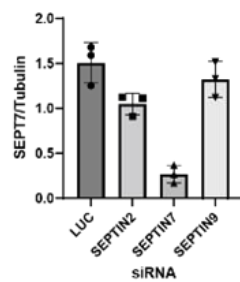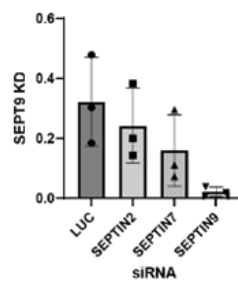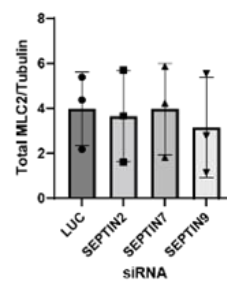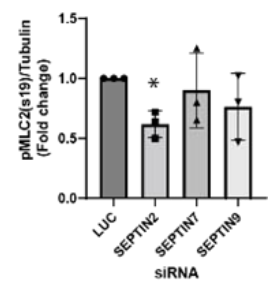

**Table S1. Full list of proteins identified by Rab27a-eGFP-APEX2 proximity in unstimulated endothelial cells**

| Acc         | Prot Name                                                                                         | p value  | fold (log <sub>2</sub> scale) | Significant |
|-------------|---------------------------------------------------------------------------------------------------|----------|-------------------------------|-------------|
| HECD1_HUMAN | E3 ubiquitin-protein ligase HECTD1 OS=Homo sapiens GN=HECTD1 PE=1 SV=3                            | 0.009737 | 8.545706                      | yes         |
| GOGA5_HUMAN | Golgin subfamily A member 5 OS=Homo sapiens GN=GOLGA5 PE=1 SV=3                                   | 0.000197 | 8.150948                      | yes         |
| MYRIP_HUMAN | Rab effector MyRIP OS=Homo sapiens GN=MYRIP PE=1 SV=2                                             | 0.000493 | 7.684593                      | yes         |
| AL1A1_HUMAN | Retinal dehydrogenase 1 OS=Homo sapiens GN=ALDH1A1 PE=1 SV=2                                      | 0.024155 | 7.59849                       | yes         |
| DAB2_HUMAN  | Disabled homolog 2 OS=Homo sapiens GN=DAB2 PE=1 SV=3                                              | 0.001307 | 7.453004                      | yes         |
| S23IP_HUMAN | SEC23-interacting protein OS=Homo sapiens GN=SEC23IP PE=1 SV=1                                    | 6.64E-05 | 7.403706                      | yes         |
| PDXD1_HUMAN | Pyridoxal-dependent decarboxylase domain-containing protein 1 OS=Homo sapiens GN=PDXDC1 PE=1 SV=2 | 1.84E-05 | 7.394522                      | yes         |
| RN213_HUMAN | E3 ubiquitin-protein ligase RNF213 OS=Homo sapiens GN=RNF213 PE=1 SV=3                            | 4.81E-05 | 7.232809                      | yes         |
| RGPD3_HUMAN | RanBP2-like and GRIP domain-containing protein 3 OS=Homo sapiens GN=RGPD3 PE=3 SV=2               | 0.008297 | 7.108951                      | yes         |
| RB6I2_HUMAN | ELKS/Rab6-interacting/CAST family member 1 OS=Homo sapiens GN=ERC1 PE=1 SV=1                      | 0.001848 | 6.940467                      | yes         |
| ZN598_HUMAN | Zinc finger protein 598 OS=Homo sapiens GN=ZNF598 PE=1 SV=1                                       | 0.020157 | 6.903336                      | yes         |

|             |                                                                                                                   |          |          |     |
|-------------|-------------------------------------------------------------------------------------------------------------------|----------|----------|-----|
| OSBL9_HUMAN | Oxysterol-binding protein-related protein 9 OS=Homo sapiens OX=9606 GN=OSBPL9 PE=1 SV=2                           | 0.003005 | 6.88943  | yes |
| MX1_HUMAN   | Interferon-induced GTP-binding protein Mx1 OS=Homo sapiens GN=MX1 PE=1 SV=4                                       | 0.017686 | 6.809787 | yes |
| DJC13_HUMAN | DnaJ homolog subfamily C member 13 OS=Homo sapiens GN=DNAJC13 PE=1 SV=5                                           | 0.001331 | 6.75512  | yes |
| ARHG7_HUMAN | Rho guanine nucleotide exchange factor 7 OS=Homo sapiens OX=9606 GN=ARHGEF7 PE=1 SV=2                             | 0.020737 | 6.713428 | yes |
| PTN11_HUMAN | Tyrosine-protein phosphatase non-receptor type 11 OS=Homo sapiens GN=PTPN11 PE=1 SV=2                             | 0.022974 | 6.695261 | yes |
| BRK1_HUMAN  | Protein BRICK1 OS=Homo sapiens OX=9606 GN=BRK1 PE=1 SV=1                                                          | 0.012351 | 6.663803 | yes |
| MRCKB_HUMAN | Serine/threonine-protein kinase MRCK beta OS=Homo sapiens GN=CDC42BPB PE=1 SV=2                                   | 3.62E-06 | 6.581071 | yes |
| OGT1_HUMAN  | UDP-N-acetylglucosamine--peptide N-acetylglucosaminyltransferase 110 kDa subunit OS=Homo sapiens GN=OGT PE=1 SV=3 | 0.001298 | 6.573009 | yes |
| CLAP2_HUMAN | CLIP-associating protein 2 OS=Homo sapiens GN=CLASP2 PE=1 SV=2                                                    | 0.001996 | 6.511881 | yes |
| JIP4_HUMAN  | C-Jun-amino-terminal kinase-interacting protein 4 OS=Homo sapiens GN=SPAG9 PE=1 SV=4                              | 6.58E-06 | 6.510294 | yes |
| UBXN4_HUMAN | UBX domain-containing protein 4 OS=Homo sapiens OX=9606 GN=UBXN4 PE=1 SV=2                                        | 0.00744  | 6.480016 | yes |
| AKP13_HUMAN | A-kinase anchor protein 13 OS=Homo sapiens GN=AKAP13 PE=1 SV=2                                                    | 0.008925 | 6.476722 | yes |

|                 |                                                                                                  |                  |                  |     |
|-----------------|--------------------------------------------------------------------------------------------------|------------------|------------------|-----|
| PHLB2<br>_HUMAN | Pleckstrin homology-like domain family B member 2 OS=Homo sapiens<br>OX=9606 GN=PHLDB2 PE=1 SV=2 | 0.03<br>895<br>5 | 6.46<br>446<br>2 | yes |
| UACA<br>_HUMAN  | Uveal autoantigen with coiled-coil domains and ankyrin repeats OS=Homo sapiens GN=UACA PE=1 SV=2 | 0.00<br>374<br>2 | 6.36<br>076<br>6 | yes |
| CLAP1<br>_HUMAN | CLIP-associating protein 1 OS=Homo sapiens GN=CLASP1 PE=1 SV=1                                   | 0.02<br>681<br>2 | 6.34<br>386<br>9 | yes |
| MICA2<br>_HUMAN | [F-actin]-monooxygenase MICAL2 OS=Homo sapiens OX=9606<br>GN=MICAL2 PE=1 SV=1                    | 0.01<br>805      | 6.32<br>515<br>9 | yes |
| GOGA2<br>_HUMAN | Golgin subfamily A member 2 OS=Homo sapiens GN=GOLGA2 PE=1 SV=3                                  | 1.74<br>E-<br>06 | 6.31<br>964<br>5 | yes |
| TANK<br>_HUMAN  | TRAF family member-associated NF-kappa-B activator OS=Homo sapiens<br>OX=9606 GN=TANK PE=1 SV=2  | 0.00<br>943<br>5 | 6.31<br>228<br>2 | yes |
| BCAR1<br>_HUMAN | Breast cancer anti-estrogen resistance protein 1 OS=Homo sapiens<br>GN=BCAR1 PE=1 SV=2           | 6.95<br>E-<br>05 | 6.24<br>081<br>3 | yes |
| MB12A<br>_HUMAN | Multivesicular body subunit 12A OS=Homo sapiens OX=9606 GN=MVB12A<br>PE=1 SV=1                   | 0.00<br>644      | 6.21<br>304<br>1 | yes |
| GOGA3<br>_HUMAN | Golgin subfamily A member 3 OS=Homo sapiens GN=GOLGA3 PE=1 SV=2                                  | 7.75<br>E-<br>07 | 6.21<br>033<br>2 | yes |
| NLRP1<br>_HUMAN | NACHT, LRR and PYD domains-containing protein 1 OS=Homo sapiens<br>GN=NLRP1 PE=1 SV=1            | 0.02<br>605      | 6.20<br>718<br>6 | yes |
| DDX58<br>_HUMAN | Probable ATP-dependent RNA helicase DDX58 OS=Homo sapiens<br>GN=DDX58 PE=1 SV=2                  | 0.00<br>364<br>6 | 6.19<br>969<br>2 | yes |
| DOC10<br>_HUMAN | Dedicator of cytokinesis protein 10 OS=Homo sapiens GN=DOCK10 PE=1<br>SV=3                       | 0.04<br>718<br>7 | 6.16<br>000<br>5 | yes |

|             |                                                                                        |          |          |     |
|-------------|----------------------------------------------------------------------------------------|----------|----------|-----|
| TBCD5_HUMAN | TBC1 domain family member 5 OS=Homo sapiens OX=9606 GN=TBC1D5 PE=1 SV=1                | 0.002892 | 6.142402 | yes |
| GRAP1_HUMAN | GRIP1-associated protein 1 OS=Homo sapiens OX=9606 GN=GRIPAP1 PE=1 SV=2                | 0.016621 | 6.107214 | yes |
| GCP3_HUMAN  | Gamma-tubulin complex component 3 OS=Homo sapiens GN=TUBGCP3 PE=1 SV=2                 | 4.27E-05 | 6.09418  | yes |
| RFIP5_HUMAN | Rab11 family-interacting protein 5 OS=Homo sapiens GN=RAB11FIP5 PE=1 SV=1              | 0.008569 | 6.085981 | yes |
| SCRIB_HUMAN | Protein scribble homolog OS=Homo sapiens GN=SCRIB PE=1 SV=4                            | 0.011807 | 6.01661  | yes |
| ECM29_HUMAN | Proteasome-associated protein ECM29 homolog OS=Homo sapiens GN=ECM29 PE=1 SV=2         | 0.000435 | 6.00233  | yes |
| EEA1_HUMAN  | Early endosome antigen 1 OS=Homo sapiens GN=EEA1 PE=1 SV=2                             | 0.008524 | 5.992997 | yes |
| AFAD_HUMAN  | Afadin OS=Homo sapiens GN=MLLT4 PE=1 SV=3                                              | 0.016549 | 5.990635 | yes |
| CNOT1_HUMAN | CCR4-NOT transcription complex subunit 1 OS=Homo sapiens GN=CNOT1 PE=1 SV=2            | 0.000346 | 5.975253 | yes |
| SPIR1_HUMAN | Protein spire homolog 1 OS=Homo sapiens OX=9606 GN=SPIRE1 PE=1 SV=3                    | 0.017111 | 5.92116  | yes |
| GAK_HUMAN   | Cyclin-G-associated kinase OS=Homo sapiens GN=GAK PE=1 SV=2                            | 3.49E-05 | 5.915786 | yes |
| IF4G3_HUMAN | Eukaryotic translation initiation factor 4 gamma 3 OS=Homo sapiens GN=EIF4G3 PE=1 SV=2 | 0.010303 | 5.882259 | yes |

|             |                                                                                                                   |          |          |     |
|-------------|-------------------------------------------------------------------------------------------------------------------|----------|----------|-----|
| P3C2A_HUMAN | Phosphatidylinositol 4-phosphate 3-kinase C2 domain-containing subunit alpha OS=Homo sapiens GN=PIK3C2A PE=1 SV=2 | 0.027994 | 5.877984 | yes |
| GOSR1_HUMAN | Golgi SNAP receptor complex member 1 OS=Homo sapiens OX=9606 GN=GOSR1 PE=1 SV=1                                   | 0.023461 | 5.872499 | yes |
| DHX36_HUMAN | ATP-dependent RNA helicase DHX36 OS=Homo sapiens GN=DHX36 PE=1 SV=2                                               | 0.027323 | 5.865774 | yes |
| IFIT2_HUMAN | Interferon-induced protein with tetratricopeptide repeats 2 OS=Homo sapiens GN=IFIT2 PE=1 SV=1                    | 0.017743 | 5.858229 | yes |
| SNP29_HUMAN | Synaptosomal-associated protein 29 OS=Homo sapiens GN=SNAP29 PE=1 SV=1                                            | 0.00139  | 5.828414 | yes |
| SYTL4_HUMAN | Synaptotagmin-like protein 4 OS=Homo sapiens GN=SYTL4 PE=1 SV=2                                                   | 0.004176 | 5.826622 | yes |
| PP12C_HUMAN | Protein phosphatase 1 regulatory subunit 12C OS=Homo sapiens GN=PPP1R12C PE=1 SV=1                                | 0.008172 | 5.816045 | yes |
| IFIT1_HUMAN | Interferon-induced protein with tetratricopeptide repeats 1 OS=Homo sapiens GN=IFIT1 PE=1 SV=2                    | 0.000374 | 5.81256  | yes |
| RHG29_HUMAN | Rho GTPase-activating protein 29 OS=Homo sapiens GN=ARHGAP29 PE=1 SV=2                                            | 3.53E-08 | 5.735355 | yes |
| ABLM1_HUMAN | Actin-binding LIM protein 1 OS=Homo sapiens GN=ABLIM1 PE=1 SV=3                                                   | 0.01172  | 5.716886 | yes |
| EXOC4_HUMAN | Exocyst complex component 4 OS=Homo sapiens GN=EXOC4 PE=1 SV=1                                                    | 0.000582 | 5.714736 | yes |
| VP37B_HUMAN | Vacuolar protein sorting-associated protein 37B OS=Homo sapiens GN=VPS37B PE=1 SV=1                               | 0.003468 | 5.709545 | yes |



|             |                                                                                         |                  |                  |     |
|-------------|-----------------------------------------------------------------------------------------|------------------|------------------|-----|
| CLIP1_HUMAN | CAP-Gly domain-containing linker protein 1 OS=Homo sapiens GN=CLIP1 PE=1 SV=2           | 0.00<br>054<br>7 | 5.67<br>820<br>5 | yes |
| CND1_HUMAN  | Condensin complex subunit 1 OS=Homo sapiens GN=NCAPD2 PE=1 SV=3                         | 0.02<br>628      | 5.64<br>719<br>8 | yes |
| STA13_HUMAN | StAR-related lipid transfer protein 13 OS=Homo sapiens OX=9606 GN=STARD13 PE=1 SV=2     | 0.01<br>497<br>7 | 5.64<br>057<br>8 | yes |
| RUFY1_HUMAN | RUN and FYVE domain-containing protein 1 OS=Homo sapiens GN=RUFY1 PE=1 SV=2             | 0.01<br>413<br>8 | 5.63<br>425      | yes |
| TMF1_HUMAN  | TATA element modulatory factor OS=Homo sapiens GN=TMF1 PE=1 SV=2                        | 3.25<br>E-<br>05 | 5.62<br>568<br>9 | yes |
| MMS19_HUMAN | MMS19 nucleotide excision repair protein homolog OS=Homo sapiens GN=MMS19 PE=1 SV=2     | 0.01<br>149<br>9 | 5.61<br>551<br>5 | yes |
| CDC27_HUMAN | Cell division cycle protein 27 homolog OS=Homo sapiens GN=CDC27 PE=1 SV=2               | 2.08<br>E-<br>05 | 5.56<br>454<br>2 | yes |
| PTN12_HUMAN | Tyrosine-protein phosphatase non-receptor type 12 OS=Homo sapiens GN=PTPN12 PE=1 SV=3   | 1.15<br>E-<br>05 | 5.54<br>461<br>5 | yes |
| ITB4_HUMAN  | Integrin beta-4 OS=Homo sapiens GN=ITGB4 PE=1 SV=5                                      | 0.00<br>778<br>4 | 5.53<br>678<br>4 | yes |
| DCTN4_HUMAN | Dynactin subunit 4 OS=Homo sapiens GN=DCTN4 PE=1 SV=1                                   | 0.00<br>108<br>3 | 5.52<br>050<br>9 | yes |
| EXD2_HUMAN  | Exonuclease 3'-5' domain-containing protein 2 OS=Homo sapiens OX=9606 GN=EXD2 PE=1 SV=2 | 0.01<br>552<br>9 | 5.50<br>402<br>1 | yes |
| LPP_HUMAN   | Lipoma-preferred partner OS=Homo sapiens GN=LPP PE=1 SV=1                               | 0.01<br>769<br>3 | 5.47<br>962<br>8 | yes |

|              |                                                                                                              |          |          |     |
|--------------|--------------------------------------------------------------------------------------------------------------|----------|----------|-----|
| GAPD1_HUMAN  | GTPase-activating protein and VPS9 domain-containing protein 1 OS=Homo sapiens GN=GAPVD1 PE=1 SV=2           | 0.001057 | 5.47066  | yes |
| NFKB2_HUMAN  | Nuclear factor NF-kappa-B p100 subunit OS=Homo sapiens GN=NFKB2 PE=1 SV=4                                    | 0.000695 | 5.449474 | yes |
| KLC2_HUMAN   | Kinesin light chain 2 OS=Homo sapiens GN=KLC2 PE=1 SV=1                                                      | 0.027363 | 5.401711 | yes |
| BIG1_HUMAN   | Brefeldin A-inhibited guanine nucleotide-exchange protein 1 OS=Homo sapiens GN=ARFGEF1 PE=1 SV=2             | 2.12E-05 | 5.391298 | yes |
| TF65_HUMAN   | Transcription factor p65 OS=Homo sapiens GN=RELA PE=1 SV=2                                                   | 0.030004 | 5.385542 | yes |
| FRM4A_HUMAN  | FERM domain-containing protein 4A OS=Homo sapiens GN=FRMD4A PE=1 SV=3                                        | 0.006736 | 5.367296 | yes |
| ARHG12_HUMAN | Rho guanine nucleotide exchange factor 12 OS=Homo sapiens GN=ARHGEF12 PE=1 SV=1                              | 0.002581 | 5.345869 | yes |
| DPP9_HUMAN   | Dipeptidyl peptidase 9 OS=Homo sapiens OX=9606 GN=DPP9 PE=1 SV=3                                             | 0.026235 | 5.343527 | yes |
| DOCK4_HUMAN  | Dedicator of cytokinesis protein 4 OS=Homo sapiens GN=DOCK4 PE=1 SV=3                                        | 4.83E-05 | 5.341448 | yes |
| SASH1_HUMAN  | SAM and SH3 domain-containing protein 1 OS=Homo sapiens GN=SASH1 PE=1 SV=3                                   | 0.015232 | 5.334716 | yes |
| PDE3A_HUMAN  | cGMP-inhibited 3',5'-cyclic phosphodiesterase A OS=Homo sapiens GN=PDE3A PE=1 SV=3                           | 0.009727 | 5.333942 | yes |
| GBF1_HUMAN   | Golgi-specific brefeldin A-resistance guanine nucleotide exchange factor 1 OS=Homo sapiens GN=GBF1 PE=1 SV=2 | 0.000443 | 5.317469 | yes |

|             |                                                                                                                  |                  |                  |     |
|-------------|------------------------------------------------------------------------------------------------------------------|------------------|------------------|-----|
| DEOC_HUMAN  | Deoxyribose-phosphate aldolase OS=Homo sapiens OX=9606 GN=DERA PE=1 SV=2                                         | 0.02<br>278<br>3 | 5.30<br>529<br>8 | yes |
| NFKB1_HUMAN | Nuclear factor NF-kappa-B p105 subunit OS=Homo sapiens GN=NFKB1 PE=1 SV=2                                        | 0.00<br>022<br>5 | 5.29<br>983<br>8 | yes |
| RFLA_HUMAN  | Refilin-A OS=Homo sapiens OX=9606 GN=RFLNA PE=1 SV=3                                                             | 0.02<br>528<br>6 | 5.26<br>558<br>9 | yes |
| LRCH3_HUMAN | Leucine-rich repeat and calponin homology domain-containing protein 3 OS=Homo sapiens OX=9606 GN=LRCH3 PE=1 SV=2 | 0.01<br>707<br>7 | 5.26<br>284<br>8 | yes |
| IST1_HUMAN  | IST1 homolog OS=Homo sapiens GN=IST1 PE=1 SV=1                                                                   | 0.00<br>459<br>7 | 5.25<br>987<br>3 | yes |
| CBL_HUMAN   | E3 ubiquitin-protein ligase CBL OS=Homo sapiens GN=CBL PE=1 SV=2                                                 | 0.02<br>700<br>1 | 5.25<br>961<br>6 | yes |
| NDE1_HUMAN  | Nuclear distribution protein nudE homolog 1 OS=Homo sapiens OX=9606 GN=NDE1 PE=1 SV=3                            | 0.04<br>165<br>3 | 5.25<br>855<br>2 | yes |
| TENS1_HUMAN | Tensin-1 OS=Homo sapiens GN=TNS1 PE=1 SV=2                                                                       | 0.00<br>291<br>1 | 5.23<br>107<br>7 | yes |
| ROCK1_HUMAN | Rho-associated protein kinase 1 OS=Homo sapiens GN=ROCK1 PE=1 SV=1                                               | 0.00<br>037<br>3 | 5.22<br>935<br>6 | yes |
| GIT2_HUMAN  | ARF GTPase-activating protein GIT2 OS=Homo sapiens GN=GIT2 PE=1 SV=2                                             | 0.00<br>527<br>3 | 5.22<br>635<br>7 | yes |
| TBD2B_HUMAN | TBC1 domain family member 2B OS=Homo sapiens GN=TBC1D2B PE=1 SV=2                                                | 0.01<br>941<br>6 | 5.21<br>720<br>6 | yes |
| CNOT3_HUMAN | CCR4-NOT transcription complex subunit 3 OS=Homo sapiens GN=CNOT3 PE=1 SV=1                                      | 0.00<br>053<br>5 | 5.20<br>684<br>4 | yes |

|                 |                                                                                                                 |              |              |     |
|-----------------|-----------------------------------------------------------------------------------------------------------------|--------------|--------------|-----|
| FRMD6<br>_HUMAN | FERM domain-containing protein 6 OS=Homo sapiens GN=FRMD6 PE=1 SV=1                                             | 8.01<br>E-05 | 5.19<br>7059 | yes |
| ANR28<br>_HUMAN | Serine/threonine-protein phosphatase 6 regulatory ankyrin repeat subunit A OS=Homo sapiens GN=ANKRD28 PE=1 SV=5 | 0.00<br>0942 | 5.18<br>3664 | yes |
| GPDM<br>_HUMAN  | Glycerol-3-phosphate dehydrogenase, mitochondrial OS=Homo sapiens GN=GPD2 PE=1 SV=3                             | 0.00<br>1345 | 5.14<br>6545 | yes |
| UN13D<br>_HUMAN | Protein unc-13 homolog D OS=Homo sapiens GN=UNC13D PE=1 SV=1                                                    | 0.00<br>0236 | 5.13<br>43   | yes |
| RHG21<br>_HUMAN | Rho GTPase-activating protein 21 OS=Homo sapiens GN=ARHGAP21 PE=1 SV=1                                          | 0.01<br>5357 | 5.12<br>9842 | yes |
| CYTSA<br>_HUMAN | Cytospin-A OS=Homo sapiens GN=SPECC1L PE=1 SV=2                                                                 | 0.00<br>7322 | 5.12<br>4126 | yes |
| LRBA<br>_HUMAN  | Lipopolysaccharide-responsive and beige-like anchor protein OS=Homo sapiens GN=LRBA PE=1 SV=4                   | 0.00<br>0782 | 5.11<br>3779 | yes |
| NFAC2<br>_HUMAN | Nuclear factor of activated T-cells, cytoplasmic 2 OS=Homo sapiens GN=NFATC2 PE=1 SV=2                          | 0.00<br>0199 | 5.10<br>937  | yes |
| IQGA2<br>_HUMAN | Ras GTPase-activating-like protein IQGAP2 OS=Homo sapiens GN=IQGAP2 PE=1 SV=4                                   | 0.02<br>9854 | 5.10<br>2255 | yes |
| STRN<br>_HUMAN  | Striatin OS=Homo sapiens GN=STRN PE=1 SV=4                                                                      | 0.00<br>0795 | 5.09<br>0158 | yes |
| ANKH1<br>_HUMAN | Ankyrin repeat and KH domain-containing protein 1 OS=Homo sapiens GN=ANKHD1 PE=1 SV=1                           | 0.01<br>3143 | 5.08<br>5616 | yes |
| FGD4<br>_HUMAN  | FYVE, RhoGEF and PH domain-containing protein 4 OS=Homo sapiens GN=FGD4 PE=1 SV=2                               | 0.00<br>7379 | 5.07<br>0054 | yes |

|             |                                                                                                 |                  |                  |     |
|-------------|-------------------------------------------------------------------------------------------------|------------------|------------------|-----|
| SC23B_HUMAN | Protein transport protein Sec23B OS=Homo sapiens GN=SEC23B PE=1 SV=2                            | 0.00<br>010<br>8 | 5.05<br>575<br>9 | yes |
| RBGPR_HUMAN | Rab3 GTPase-activating protein non-catalytic subunit OS=Homo sapiens GN=RAB3GAP2 PE=1 SV=1      | 0.00<br>668<br>2 | 5.05<br>145<br>5 | yes |
| WNK1_HUMAN  | Serine/threonine-protein kinase WNK1 OS=Homo sapiens GN=WNK1 PE=1 SV=2                          | 0.01<br>032<br>8 | 5.04<br>497<br>7 | yes |
| NEB2_HUMAN  | Neurabin-2 OS=Homo sapiens GN=PPP1R9B PE=1 SV=2                                                 | 0.03<br>588<br>5 | 5.00<br>512<br>5 | yes |
| SHIP2_HUMAN | Phosphatidylinositol 3,4,5-trisphosphate 5-phosphatase 2 OS=Homo sapiens GN=INPPL1 PE=1 SV=2    | 0.04<br>669<br>9 | 5.00<br>429<br>1 | yes |
| INF2_HUMAN  | Inverted formin-2 OS=Homo sapiens GN=INF2 PE=1 SV=2                                             | 0.00<br>012<br>6 | 4.99<br>852<br>1 | yes |
| GOPC_HUMAN  | Golgi-associated PDZ and coiled-coil motif-containing protein OS=Homo sapiens GN=GOPC PE=1 SV=1 | 0.00<br>146<br>5 | 4.95<br>307<br>7 | yes |
| CPIN1_HUMAN | Anamorsin OS=Homo sapiens GN=CIAPIN1 PE=1 SV=2                                                  | 0.00<br>845<br>5 | 4.91<br>872<br>5 | yes |
| NEDD1_HUMAN | Protein NEDD1 OS=Homo sapiens GN=NEDD1 PE=1 SV=1                                                | 0.01<br>068<br>8 | 4.90<br>579<br>2 | yes |
| TNR6B_HUMAN | Trinucleotide repeat-containing gene 6B protein OS=Homo sapiens GN=TNRC6B PE=1 SV=4             | 0.01<br>822<br>1 | 4.89<br>898<br>7 | yes |
| FGD5_HUMAN  | FYVE, RhoGEF and PH domain-containing protein 5 OS=Homo sapiens GN=FGD5 PE=1 SV=3               | 0.00<br>448<br>9 | 4.89<br>199<br>3 | yes |
| UBP4_HUMAN  | Ubiquitin carboxyl-terminal hydrolase 4 OS=Homo sapiens GN=USP4 PE=1 SV=3                       | 0.01<br>173      | 4.89<br>106<br>2 | yes |

|             |                                                                                                               |          |          |     |
|-------------|---------------------------------------------------------------------------------------------------------------|----------|----------|-----|
| TAP1_HUMAN  | Antigen peptide transporter 1 OS=Homo sapiens OX=9606 GN=TAP1 PE=1 SV=2                                       | 0.015106 | 4.885005 | yes |
| REPS1_HUMAN | RalBP1-associated Eps domain-containing protein 1 OS=Homo sapiens GN=REPS1 PE=1 SV=3                          | 0.008837 | 4.883479 | yes |
| ARAP3_HUMAN | Arf-GAP with Rho-GAP domain, ANK repeat and PH domain-containing protein 3 OS=Homo sapiens GN=ARAP3 PE=1 SV=1 | 0.000725 | 4.876882 | yes |
| TFG_HUMAN   | Protein TFG OS=Homo sapiens GN=TFG PE=1 SV=2                                                                  | 2.77E-05 | 4.876745 | yes |
| PANK4_HUMAN | Pantothenate kinase 4 OS=Homo sapiens GN=PANK4 PE=1 SV=1                                                      | 1.73E-05 | 4.872254 | yes |
| BCR_HUMAN   | Breakpoint cluster region protein OS=Homo sapiens GN=BCR PE=1 SV=2                                            | 0.000147 | 4.848692 | yes |
| NU153_HUMAN | Nuclear pore complex protein Nup153 OS=Homo sapiens GN=NUP153 PE=1 SV=2                                       | 1.47E-05 | 4.835763 | yes |
| MTOR_HUMAN  | Serine/threonine-protein kinase mTOR OS=Homo sapiens GN=MTOR PE=1 SV=1                                        | 0.005595 | 4.829518 | yes |
| HIP1R_HUMAN | Huntingtin-interacting protein 1-related protein OS=Homo sapiens GN=HIP1R PE=1 SV=2                           | 0.018244 | 4.82175  | yes |
| SAMD9_HUMAN | Sterile alpha motif domain-containing protein 9 OS=Homo sapiens GN=SAMD9 PE=1 SV=1                            | 0.00301  | 4.813584 | yes |
| ARG28_HUMAN | Rho guanine nucleotide exchange factor 28 OS=Homo sapiens OX=9606 GN=ARHGEF28 PE=1 SV=3                       | 0.000665 | 4.808077 | yes |
| FMNL3_HUMAN | Formin-like protein 3 OS=Homo sapiens OX=9606 GN=FMNL3 PE=1 SV=3                                              | 0.049648 | 4.791566 | yes |

|                 |                                                                                               |                  |                  |     |
|-----------------|-----------------------------------------------------------------------------------------------|------------------|------------------|-----|
| OSBP1_<br>HUMAN | Oxysterol-binding protein 1 OS=Homo sapiens GN=OSBP PE=1 SV=1                                 | 4.82<br>E-<br>06 | 4.78<br>356<br>5 | yes |
| ZW10_<br>HUMAN  | Centromere/kinetochore protein zw10 homolog OS=Homo sapiens GN=ZW10 PE=1 SV=3                 | 0.00<br>065<br>7 | 4.77<br>949<br>5 | yes |
| EPS15_<br>HUMAN | Epidermal growth factor receptor substrate 15 OS=Homo sapiens GN=EPS15 PE=1 SV=2              | 7.91<br>E-<br>06 | 4.77<br>848<br>9 | yes |
| XRN1_<br>HUMAN  | 5'-3' exoribonuclease 1 OS=Homo sapiens GN=XRN1 PE=1 SV=1                                     | 0.00<br>127<br>4 | 4.77<br>341<br>4 | yes |
| PLXD1_<br>HUMAN | Plexin-D1 OS=Homo sapiens GN=PLXND1 PE=1 SV=3                                                 | 0.00<br>418<br>6 | 4.76<br>528<br>9 | yes |
| HGS_H<br>UMAN   | Hepatocyte growth factor-regulated tyrosine kinase substrate OS=Homo sapiens GN=HGS PE=1 SV=1 | 1.49<br>E-<br>05 | 4.75<br>923<br>9 | yes |
| ARFG1_<br>HUMAN | ADP-ribosylation factor GTPase-activating protein 1 OS=Homo sapiens GN=ARFGAP1 PE=1 SV=2      | 1.29<br>E-<br>05 | 4.74<br>856<br>6 | yes |
| SC24B_<br>HUMAN | Protein transport protein Sec24B OS=Homo sapiens GN=SEC24B PE=1 SV=2                          | 2.85<br>E-<br>05 | 4.74<br>112<br>5 | yes |
| NU160_<br>HUMAN | Nuclear pore complex protein Nup160 OS=Homo sapiens GN=NUP160 PE=1 SV=3                       | 0.01<br>405<br>5 | 4.73<br>935      | yes |
| MYO9B_<br>HUMAN | Unconventional myosin-IXb OS=Homo sapiens GN=MYO9B PE=1 SV=3                                  | 0.00<br>073<br>6 | 4.73<br>059<br>7 | yes |
| OSB10_<br>HUMAN | Oxysterol-binding protein-related protein 10 OS=Homo sapiens GN=OSBPL10 PE=1 SV=2             | 0.00<br>134<br>8 | 4.72<br>528<br>4 | yes |
| ASPC1_<br>HUMAN | Tether containing UBX domain for GLUT4 OS=Homo sapiens GN=ASPC1 PE=1 SV=1                     | 0.01<br>667<br>6 | 4.72<br>065<br>4 | yes |

|             |                                                                                                             |                  |                  |     |
|-------------|-------------------------------------------------------------------------------------------------------------|------------------|------------------|-----|
| PTN23_HUMAN | Tyrosine-protein phosphatase non-receptor type 23 OS=Homo sapiens GN=PTPN23 PE=1 SV=1                       | 7.50<br>E-<br>05 | 4.71<br>919<br>5 | yes |
| PA24A_HUMAN | Cytosolic phospholipase A2 OS=Homo sapiens GN=PLA2G4A PE=1 SV=2                                             | 0.00<br>328<br>3 | 4.71<br>680<br>2 | yes |
| HOOK3_HUMAN | Protein Hook homolog 3 OS=Homo sapiens GN=HOOK3 PE=1 SV=2                                                   | 0.00<br>164<br>5 | 4.70<br>229<br>1 | yes |
| MON2_HUMAN  | Protein MON2 homolog OS=Homo sapiens GN=MON2 PE=1 SV=3                                                      | 0.00<br>060<br>9 | 4.68<br>445<br>3 | yes |
| STAT2_HUMAN | Signal transducer and activator of transcription 2 OS=Homo sapiens GN=STAT2 PE=1 SV=1                       | 0.00<br>630<br>9 | 4.67<br>177<br>1 | yes |
| TGFI1_HUMAN | Transforming growth factor beta-1-induced transcript 1 protein OS=Homo sapiens OX=9606 GN=TGFB1I1 PE=1 SV=2 | 0.02<br>965<br>3 | 4.65<br>291<br>1 | yes |
| NEMO_HUMAN  | NF-kappa-B essential modulator OS=Homo sapiens GN=IKBKG PE=1 SV=2                                           | 0.00<br>384<br>1 | 4.65<br>263<br>9 | yes |
| F91A1_HUMAN | Protein FAM91A1 OS=Homo sapiens GN=FAM91A1 PE=1 SV=3                                                        | 0.01<br>335<br>6 | 4.65<br>131<br>1 | yes |
| RB3GP_HUMAN | Rab3 GTPase-activating protein catalytic subunit OS=Homo sapiens GN=RAB3GAP1 PE=1 SV=3                      | 0.00<br>220<br>9 | 4.64<br>733<br>3 | yes |
| VATE1_HUMAN | V-type proton ATPase subunit E 1 OS=Homo sapiens OX=9606 GN=ATP6V1E1 PE=1 SV=1                              | 0.01<br>095<br>4 | 4.63<br>186<br>4 | yes |
| DNM1L_HUMAN | Dynamamin-1-like protein OS=Homo sapiens GN=DNM1L PE=1 SV=2                                                 | 0.00<br>044<br>7 | 4.62<br>366<br>4 | yes |
| AP1G1_HUMAN | AP-1 complex subunit gamma-1 OS=Homo sapiens GN=AP1G1 PE=1 SV=5                                             | 0.03<br>064<br>2 | 4.61<br>464<br>9 | yes |



|             |                                                                                            |          |          |     |
|-------------|--------------------------------------------------------------------------------------------|----------|----------|-----|
| TRIPB_HUMAN | Thyroid receptor-interacting protein 11 OS=Homo sapiens GN=TRIP11 PE=1 SV=3                | 0.003041 | 4.60696  | yes |
| RB27A_HUMAN | Ras-related protein Rab-27A OS=Homo sapiens GN=RAB27A PE=1 SV=3                            | 1.31E-07 | 4.59501  | yes |
| ROCK2_HUMAN | Rho-associated protein kinase 2 OS=Homo sapiens GN=ROCK2 PE=1 SV=4                         | 6.85E-08 | 4.56588  | yes |
| BET1_HUMAN  | BET1 homolog OS=Homo sapiens OX=9606 GN=BET1 PE=1 SV=1                                     | 0.019728 | 4.559908 | yes |
| GIMA8_HUMAN | GTPase IMAP family member 8 OS=Homo sapiens GN=GIMAP8 PE=2 SV=2                            | 0.023554 | 4.556555 | yes |
| DYL1_HUMAN  | Dynein light chain 1, cytoplasmic OS=Homo sapiens GN=DYNLL1 PE=1 SV=1                      | 0.040854 | 4.547823 | yes |
| CARD6_HUMAN | Caspase recruitment domain-containing protein 6 OS=Homo sapiens OX=9606 GN=CARD6 PE=1 SV=2 | 0.011614 | 4.544319 | yes |
| ABI1_HUMAN  | Abl interactor 1 OS=Homo sapiens GN=ABI1 PE=1 SV=4                                         | 0.001023 | 4.542969 | yes |
| DNJC1_HUMAN | DnaJ homolog subfamily C member 1 OS=Homo sapiens OX=9606 GN=DNAJC1 PE=1 SV=1              | 0.016289 | 4.531426 | yes |
| Z3H7A_HUMAN | Zinc finger CCCH domain-containing protein 7A OS=Homo sapiens OX=9606 GN=ZC3H7A PE=1 SV=1  | 0.023836 | 4.529847 | yes |
| TGON2_HUMAN | Trans-Golgi network integral membrane protein 2 OS=Homo sapiens GN=TGOLN2 PE=1 SV=2        | 0.020592 | 4.522975 | yes |
| PECA1_HUMAN | Platelet endothelial cell adhesion molecule OS=Homo sapiens GN=PECAM1 PE=1 SV=1            | 0.007842 | 4.517801 | yes |

|             |                                                                                                                    |          |          |     |
|-------------|--------------------------------------------------------------------------------------------------------------------|----------|----------|-----|
| NHSL1_HUMAN | NHS-like protein 1 OS=Homo sapiens OX=9606 GN=NHSL1 PE=1 SV=2                                                      | 0.000837 | 4.516242 | yes |
| STAM1_HUMAN | Signal transducing adapter molecule 1 OS=Homo sapiens GN=STAM PE=1 SV=3                                            | 0.003029 | 4.496223 | yes |
| GRB10_HUMAN | Growth factor receptor-bound protein 10 OS=Homo sapiens GN=GRB10 PE=1 SV=2                                         | 0.024937 | 4.489    | yes |
| RHG31_HUMAN | Rho GTPase-activating protein 31 OS=Homo sapiens GN=ARHGAP31 PE=1 SV=2                                             | 0.004027 | 4.487971 | yes |
| ACAP2_HUMAN | Arf-GAP with coiled-coil, ANK repeat and PH domain-containing protein 2 OS=Homo sapiens OX=9606 GN=ACAP2 PE=1 SV=3 | 0.026014 | 4.484839 | yes |
| MILK1_HUMAN | MICAL-like protein 1 OS=Homo sapiens OX=9606 GN=MICALL1 PE=1 SV=2                                                  | 0.0415   | 4.481932 | yes |
| STX7_HUMAN  | Syntaxin-7 OS=Homo sapiens GN=STX7 PE=1 SV=4                                                                       | 0.000885 | 4.480661 | yes |
| A16A1_HUMAN | Aldehyde dehydrogenase family 16 member A1 OS=Homo sapiens GN=ALDH16A1 PE=1 SV=2                                   | 9.04E-06 | 4.461126 | yes |
| PAR14_HUMAN | Poly [ADP-ribose] polymerase 14 OS=Homo sapiens GN=PARP14 PE=1 SV=3                                                | 0.006369 | 4.437973 | yes |
| NRDC_HUMAN  | Nardilysin OS=Homo sapiens OX=9606 GN=NRDC PE=1 SV=3                                                               | 0.039596 | 4.437858 | yes |
| PLAP_HUMAN  | Phospholipase A-2-activating protein OS=Homo sapiens GN=PLAA PE=1 SV=2                                             | 0.006384 | 4.435551 | yes |
| GEPH_HUMAN  | Gephyrin OS=Homo sapiens GN=GPHN PE=1 SV=1                                                                         | 0.010192 | 4.431039 | yes |

|             |                                                                                                               |              |              |     |
|-------------|---------------------------------------------------------------------------------------------------------------|--------------|--------------|-----|
| AAK1_HUMAN  | AP2-associated protein kinase 1 OS=Homo sapiens GN=AAK1 PE=1 SV=3                                             | 1.80<br>E-06 | 4.42<br>3269 | yes |
| SC24A_HUMAN | Protein transport protein Sec24A OS=Homo sapiens GN=SEC24A PE=1 SV=2                                          | 6.01<br>E-05 | 4.42<br>1961 | yes |
| RFTN1_HUMAN | Raftlin OS=Homo sapiens GN=RFTN1 PE=1 SV=4                                                                    | 0.01<br>0263 | 4.41<br>7669 | yes |
| AKT1_HUMAN  | RAC-alpha serine/threonine-protein kinase OS=Homo sapiens GN=AKT1 PE=1 SV=2                                   | 0.00<br>0617 | 4.40<br>834  | yes |
| USP9X_HUMAN | Probable ubiquitin carboxyl-terminal hydrolase FAF-X OS=Homo sapiens GN=USP9X PE=1 SV=3                       | 1.75<br>E-05 | 4.40<br>635  | yes |
| DVL2_HUMAN  | Segment polarity protein dishevelled homolog DVL-2 OS=Homo sapiens GN=DVL2 PE=1 SV=1                          | 0.03<br>7282 | 4.39<br>8541 | yes |
| S12A2_HUMAN | Solute carrier family 12 member 2 OS=Homo sapiens OX=9606 GN=SLC12A2 PE=1 SV=1                                | 0.00<br>8859 | 4.39<br>184  | yes |
| UTRO_HUMAN  | Utrophin OS=Homo sapiens GN=UTRN PE=1 SV=2                                                                    | 7.05<br>E-05 | 4.38<br>9111 | yes |
| SNX9_HUMAN  | Sorting nexin-9 OS=Homo sapiens GN=SNX9 PE=1 SV=1                                                             | 0.02<br>8537 | 4.38<br>5907 | yes |
| CSN3_HUMAN  | COP9 signalosome complex subunit 3 OS=Homo sapiens GN=COPS3 PE=1 SV=3                                         | 0.02<br>7898 | 4.37<br>9812 | yes |
| PRRC1_HUMAN | Protein PRRC1 OS=Homo sapiens OX=9606 GN=PRRC1 PE=1 SV=1                                                      | 0.02<br>4049 | 4.37<br>4223 | yes |
| PREX1_HUMAN | Phosphatidylinositol 3,4,5-trisphosphate-dependent Rac exchanger 1 protein OS=Homo sapiens GN=PREX1 PE=1 SV=3 | 0.01<br>1469 | 4.36<br>2877 | yes |

|             |                                                                                                |          |          |     |
|-------------|------------------------------------------------------------------------------------------------|----------|----------|-----|
| ARHG1_HUMAN | Rho guanine nucleotide exchange factor 1 OS=Homo sapiens GN=ARHGEF1 PE=1 SV=2                  | 0.005049 | 4.352951 | yes |
| SHC1_HUMAN  | SHC-transforming protein 1 OS=Homo sapiens GN=SHC1 PE=1 SV=4                                   | 0.000232 | 4.351096 | yes |
| NAV3_HUMAN  | Neuron navigator 3 OS=Homo sapiens GN=NAV3 PE=1 SV=3                                           | 0.002424 | 4.336246 | yes |
| IFIT3_HUMAN | Interferon-induced protein with tetratricopeptide repeats 3 OS=Homo sapiens GN=IFIT3 PE=1 SV=1 | 0.001094 | 4.333461 | yes |
| DHX29_HUMAN | ATP-dependent RNA helicase DHX29 OS=Homo sapiens GN=DHX29 PE=1 SV=2                            | 0.020343 | 4.328713 | yes |
| NBAS_HUMAN  | Neuroblastoma-amplified sequence OS=Homo sapiens GN=NBAS PE=1 SV=2                             | 0.000793 | 4.324464 | yes |
| DSRAD_HUMAN | Double-stranded RNA-specific adenosine deaminase OS=Homo sapiens GN=ADAR PE=1 SV=4             | 0.000767 | 4.324092 | yes |
| DEN4C_HUMAN | DENN domain-containing protein 4C OS=Homo sapiens OX=9606 GN=DENND4C PE=1 SV=3                 | 0.048441 | 4.299663 | yes |
| ZFY16_HUMAN | Zinc finger FYVE domain-containing protein 16 OS=Homo sapiens GN=ZFYVE16 PE=1 SV=3             | 0.002348 | 4.296857 | yes |
| PHLB1_HUMAN | Pleckstrin homology-like domain family B member 1 OS=Homo sapiens GN=PHLDB1 PE=1 SV=1          | 0.023549 | 4.291291 | yes |
| LRC8A_HUMAN | Volume-regulated anion channel subunit LRRC8A OS=Homo sapiens OX=9606 GN=LRRC8A PE=1 SV=1      | 0.003289 | 4.289266 | yes |
| TRIO_HUMAN  | Triple functional domain protein OS=Homo sapiens GN=TRIO PE=1 SV=2                             | 0.000976 | 4.279892 | yes |

|             |                                                                                                    |                  |                  |     |
|-------------|----------------------------------------------------------------------------------------------------|------------------|------------------|-----|
| KI13B_HUMAN | Kinesin-like protein KIF13B OS=Homo sapiens GN=KIF13B PE=1 SV=2                                    | 0.03<br>933<br>1 | 4.25<br>349<br>7 | yes |
| NUP88_HUMAN | Nuclear pore complex protein Nup88 OS=Homo sapiens GN=NUP88 PE=1 SV=2                              | 0.00<br>867<br>4 | 4.23<br>986<br>1 | yes |
| FRYL_HUMAN  | Protein furry homolog-like OS=Homo sapiens GN=FRYL PE=1 SV=2                                       | 0.00<br>235<br>9 | 4.22<br>939      | yes |
| ARFG3_HUMAN | ADP-ribosylation factor GTPase-activating protein 3 OS=Homo sapiens GN=ARFGAP3 PE=1 SV=1           | 0.02<br>918<br>6 | 4.20<br>550<br>5 | yes |
| GCP60_HUMAN | Golgi resident protein GCP60 OS=Homo sapiens GN=ACBD3 PE=1 SV=4                                    | 0.00<br>113      | 4.20<br>320<br>5 | yes |
| PSD10_HUMAN | 26S proteasome non-ATPase regulatory subunit 10 OS=Homo sapiens GN=PSMD10 PE=1 SV=1                | 0.01<br>118<br>2 | 4.19<br>871      | yes |
| GCR_HUMAN   | Glucocorticoid receptor OS=Homo sapiens GN=NR3C1 PE=1 SV=1                                         | 0.02<br>716<br>1 | 4.19<br>542<br>8 | yes |
| CD2AP_HUMAN | CD2-associated protein OS=Homo sapiens GN=CD2AP PE=1 SV=1                                          | 0.00<br>062<br>1 | 4.18<br>837<br>5 | yes |
| CT2NL_HUMAN | CTTNBP2 N-terminal-like protein OS=Homo sapiens GN=CTTNBP2NL PE=1 SV=2                             | 7.62<br>E-<br>05 | 4.18<br>257      | yes |
| WIPI2_HUMAN | WD repeat domain phosphoinositide-interacting protein 2 OS=Homo sapiens OX=9606 GN=WIPI2 PE=1 SV=1 | 0.03<br>546<br>6 | 4.17<br>703<br>4 | yes |
| CKAP5_HUMAN | Cytoskeleton-associated protein 5 OS=Homo sapiens GN=CKAP5 PE=1 SV=3                               | 5.78<br>E-<br>06 | 4.17<br>700<br>5 | yes |
| DIAP1_HUMAN | Protein diaphanous homolog 1 OS=Homo sapiens GN=DIAPH1 PE=1 SV=2                                   | 2.07<br>E-<br>07 | 4.15<br>364<br>4 | yes |

|             |                                                                                       |          |          |     |
|-------------|---------------------------------------------------------------------------------------|----------|----------|-----|
| ATRAP_HUMAN | Type-1 angiotensin II receptor-associated protein OS=Homo sapiens GN=AGTRAP PE=1 SV=1 | 0.001354 | 4.149876 | yes |
| NRBP_HUMAN  | Nuclear receptor-binding protein OS=Homo sapiens GN=NRBP1 PE=1 SV=1                   | 7.62E-05 | 4.146243 | yes |
| EPN1_HUMAN  | Epsin-1 OS=Homo sapiens OX=9606 GN=EPN1 PE=1 SV=2                                     | 0.031182 | 4.138509 | yes |
| CCDC6_HUMAN | Coiled-coil domain-containing protein 6 OS=Homo sapiens GN=CCDC6 PE=1 SV=2            | 6.18E-05 | 4.134093 | yes |
| NBEL2_HUMAN | Neurobeachin-like protein 2 OS=Homo sapiens GN=NBEAL2 PE=1 SV=2                       | 0.00629  | 4.122282 | yes |
| ZCCHV_HUMAN | Zinc finger CCCH-type antiviral protein 1 OS=Homo sapiens GN=ZC3HAV1 PE=1 SV=3        | 1.17E-07 | 4.11216  | yes |
| OSBL8_HUMAN | Oxysterol-binding protein-related protein 8 OS=Homo sapiens GN=OSBPL8 PE=1 SV=3       | 0.015009 | 4.107217 | yes |
| PALMD_HUMAN | Palmdelphin OS=Homo sapiens GN=PALMD PE=1 SV=1                                        | 0.003457 | 4.091761 | yes |
| STX12_HUMAN | Syntaxin-12 OS=Homo sapiens GN=STX12 PE=1 SV=1                                        | 0.003257 | 4.07348  | yes |
| APC1_HUMAN  | Anaphase-promoting complex subunit 1 OS=Homo sapiens GN=ANAPC1 PE=1 SV=1              | 0.000115 | 4.07222  | yes |
| CXA1_HUMAN  | Gap junction alpha-1 protein OS=Homo sapiens GN=GJA1 PE=1 SV=2                        | 0.036553 | 4.068631 | yes |
| CND2_HUMAN  | Condensin complex subunit 2 OS=Homo sapiens GN=NCAPH PE=1 SV=3                        | 0.004303 | 4.065016 | yes |

|             |                                                                                              |          |          |     |
|-------------|----------------------------------------------------------------------------------------------|----------|----------|-----|
| GMIP_HUMAN  | GEM-interacting protein OS=Homo sapiens OX=9606 GN=GMIP PE=1 SV=2                            | 0.02982  | 4.053112 | yes |
| ASCC3_HUMAN | Activating signal cointegrator 1 complex subunit 3 OS=Homo sapiens GN=ASCC3 PE=1 SV=3        | 0.000618 | 4.044673 | yes |
| APOL2_HUMAN | Apolipoprotein L2 OS=Homo sapiens GN=APOL2 PE=1 SV=1                                         | 0.006001 | 4.043174 | yes |
| F1711_HUMAN | Protein FAM171A1 OS=Homo sapiens GN=FAM171A1 PE=1 SV=1                                       | 0.000285 | 4.018157 | yes |
| SHIP1_HUMAN | Phosphatidylinositol 3,4,5-trisphosphate 5-phosphatase 1 OS=Homo sapiens GN=INPP5D PE=1 SV=2 | 0.028826 | 4.017518 | yes |
| VP37A_HUMAN | Vacuolar protein sorting-associated protein 37A OS=Homo sapiens OX=9606 GN=VPS37A PE=1 SV=1  | 0.02394  | 3.989786 | yes |
| TANC1_HUMAN | Protein TANC1 OS=Homo sapiens GN=TANC1 PE=1 SV=3                                             | 0.00442  | 3.988757 | yes |
| PTN14_HUMAN | Tyrosine-protein phosphatase non-receptor type 14 OS=Homo sapiens GN=PTPN14 PE=1 SV=2        | 0.004015 | 3.979872 | yes |
| ARHGF_HUMAN | Rho guanine nucleotide exchange factor 15 OS=Homo sapiens GN=ARHGEF15 PE=1 SV=4              | 0.003096 | 3.966362 | yes |
| ACBD5_HUMAN | Acyl-CoA-binding domain-containing protein 5 OS=Homo sapiens OX=9606 GN=ACBD5 PE=1 SV=1      | 0.049698 | 3.955263 | yes |
| TJAP1_HUMAN | Tight junction-associated protein 1 OS=Homo sapiens GN=TJAP1 PE=1 SV=1                       | 1.99E-05 | 3.953695 | yes |
| IPO9_HUMAN  | Importin-9 OS=Homo sapiens GN=IPO9 PE=1 SV=3                                                 | 0.000369 | 3.953339 | yes |

|             |                                                                                             |          |          |     |
|-------------|---------------------------------------------------------------------------------------------|----------|----------|-----|
| PKN2_HUMAN  | Serine/threonine-protein kinase N2 OS=Homo sapiens GN=PKN2 PE=1 SV=1                        | 0.029241 | 3.948976 | yes |
| PI3R4_HUMAN | Phosphoinositide 3-kinase regulatory subunit 4 OS=Homo sapiens GN=PIK3R4 PE=1 SV=3          | 0.004317 | 3.936879 | yes |
| DOCK7_HUMAN | Dedicator of cytokinesis protein 7 OS=Homo sapiens GN=DOCK7 PE=1 SV=4                       | 0.000516 | 3.929513 | yes |
| MLKL_HUMAN  | Mixed lineage kinase domain-like protein OS=Homo sapiens OX=9606 GN=MLKL PE=1 SV=1          | 0.027105 | 3.913636 | yes |
| HTR5B_HUMAN | HEAT repeat-containing protein 5B OS=Homo sapiens GN=HEATR5B PE=1 SV=2                      | 0.012113 | 3.899371 | yes |
| CYFP1_HUMAN | Cytoplasmic FMR1-interacting protein 1 OS=Homo sapiens GN=CYFIP1 PE=1 SV=1                  | 0.028975 | 3.86799  | yes |
| SNX18_HUMAN | Sorting nexin-18 OS=Homo sapiens GN=SNX18 PE=1 SV=2                                         | 0.000909 | 3.862417 | yes |
| RELB_HUMAN  | Transcription factor RelB OS=Homo sapiens OX=9606 GN=RELB PE=1 SV=2                         | 0.026424 | 3.854865 | yes |
| PTPRK_HUMAN | Receptor-type tyrosine-protein phosphatase kappa OS=Homo sapiens OX=9606 GN=PTPRK PE=1 SV=2 | 0.0474   | 3.843409 | yes |
| TBCD4_HUMAN | TBC1 domain family member 4 OS=Homo sapiens GN=TBC1D4 PE=1 SV=2                             | 0.000922 | 3.839853 | yes |
| UBP25_HUMAN | Ubiquitin carboxyl-terminal hydrolase 25 OS=Homo sapiens GN=USP25 PE=1 SV=4                 | 0.040319 | 3.831752 | yes |
| SVIL_HUMAN  | Supervillin OS=Homo sapiens GN=SVIL PE=1 SV=2                                               | 0.000169 | 3.827031 | yes |



|             |                                                                                                  |                  |                  |     |
|-------------|--------------------------------------------------------------------------------------------------|------------------|------------------|-----|
| TSC2_HUMAN  | Tuberin OS=Homo sapiens OX=9606 GN=TSC2 PE=1 SV=2                                                | 0.00<br>252<br>6 | 3.80<br>896<br>2 | yes |
| AKAP2_HUMAN | A-kinase anchor protein 2 OS=Homo sapiens GN=AKAP2 PE=1 SV=3                                     | 0.00<br>022<br>3 | 3.80<br>803<br>5 | yes |
| TM165_HUMAN | Transmembrane protein 165 OS=Homo sapiens GN=TMEM165 PE=1 SV=1                                   | 0.01<br>276<br>9 | 3.80<br>439      | yes |
| OPTN_HUMAN  | Optineurin OS=Homo sapiens GN=OPTN PE=1 SV=2                                                     | 0.01<br>148<br>8 | 3.78<br>719<br>7 | yes |
| RBP2_HUMAN  | E3 SUMO-protein ligase RanBP2 OS=Homo sapiens GN=RANBP2 PE=1 SV=2                                | 5.14<br>E-<br>06 | 3.77<br>336<br>7 | yes |
| CNOT9_HUMAN | CCR4-NOT transcription complex subunit 9 OS=Homo sapiens OX=9606 GN=CNOT9 PE=1 SV=1              | 0.02<br>108<br>2 | 3.76<br>227<br>2 | yes |
| CARM1_HUMAN | Histone-arginine methyltransferase CARM1 OS=Homo sapiens GN=CARM1 PE=1 SV=3                      | 0.00<br>351<br>7 | 3.75<br>909<br>6 | yes |
| TES_HUMAN   | Testin OS=Homo sapiens GN=TES PE=1 SV=1                                                          | 0.00<br>036<br>4 | 3.75<br>015<br>7 | yes |
| DNJA2_HUMAN | DnaJ homolog subfamily A member 2 OS=Homo sapiens GN=DNAJA2 PE=1 SV=1                            | 0.00<br>095<br>1 | 3.74<br>778<br>6 | yes |
| BIG2_HUMAN  | Brefeldin A-inhibited guanine nucleotide-exchange protein 2 OS=Homo sapiens GN=ARFGEF2 PE=1 SV=3 | 2.21<br>E-<br>05 | 3.74<br>332<br>6 | yes |
| PUM1_HUMAN  | Pumilio homolog 1 OS=Homo sapiens GN=PUM1 PE=1 SV=3                                              | 0.00<br>450<br>2 | 3.74<br>106<br>3 | yes |
| SKIV2_HUMAN | Helicase SKI2W OS=Homo sapiens GN=SKIV2L PE=1 SV=3                                               | 0.00<br>116<br>5 | 3.73<br>893<br>9 | yes |

|             |                                                                                       |                  |                  |     |
|-------------|---------------------------------------------------------------------------------------|------------------|------------------|-----|
| TB182_HUMAN | 182 kDa tankyrase-1-binding protein OS=Homo sapiens GN=TNKS1BP1 PE=1 SV=4             | 8.08<br>E-06     | 3.73<br>800<br>1 | yes |
| SMC1A_HUMAN | Structural maintenance of chromosomes protein 1A OS=Homo sapiens GN=SMC1A PE=1 SV=2   | 0.00<br>189<br>2 | 3.71<br>747<br>3 | yes |
| PSME2_HUMAN | Proteasome activator complex subunit 2 OS=Homo sapiens GN=PSME2 PE=1 SV=4             | 0.00<br>141<br>5 | 3.71<br>003<br>6 | yes |
| NEK9_HUMAN  | Serine/threonine-protein kinase Nek9 OS=Homo sapiens GN=NEK9 PE=1 SV=2                | 6.51<br>E-05     | 3.69<br>76       | yes |
| EXOC1_HUMAN | Exocyst complex component 1 OS=Homo sapiens GN=EXOC1 PE=1 SV=4                        | 0.00<br>726<br>2 | 3.68<br>108      | yes |
| SC24D_HUMAN | Protein transport protein Sec24D OS=Homo sapiens GN=SEC24D PE=1 SV=2                  | 0.00<br>048<br>2 | 3.68<br>094<br>7 | yes |
| CIP2A_HUMAN | Protein CIP2A OS=Homo sapiens OX=9606 GN=CIP2A PE=1 SV=2                              | 0.00<br>353      | 3.67<br>770<br>2 | yes |
| ACTY_HUMAN  | Beta-centractin OS=Homo sapiens GN=ACTR1B PE=1 SV=1                                   | 0.00<br>894<br>9 | 3.67<br>553<br>4 | yes |
| SHAN3_HUMAN | SH3 and multiple ankyrin repeat domains protein 3 OS=Homo sapiens GN=SHANK3 PE=1 SV=3 | 0.03<br>036<br>5 | 3.65<br>862<br>4 | yes |
| STXB1_HUMAN | Syntaxin-binding protein 1 OS=Homo sapiens GN=STXBP1 PE=1 SV=1                        | 0.02<br>041<br>5 | 3.65<br>375<br>8 | yes |
| ARP10_HUMAN | Actin-related protein 10 OS=Homo sapiens GN=ACTR10 PE=1 SV=1                          | 0.00<br>355<br>2 | 3.63<br>023<br>9 | yes |
| MYPT1_HUMAN | Protein phosphatase 1 regulatory subunit 12A OS=Homo sapiens GN=PPP1R12A PE=1 SV=1    | 4.29<br>E-05     | 3.62<br>235<br>5 | yes |

|             |                                                                                      |                  |                  |     |
|-------------|--------------------------------------------------------------------------------------|------------------|------------------|-----|
| SC16A_HUMAN | Protein transport protein Sec16A OS=Homo sapiens GN=SEC16A PE=1 SV=3                 | 0.00<br>030<br>8 | 3.61<br>750<br>3 | yes |
| GIT1_HUMAN  | ARF GTPase-activating protein GIT1 OS=Homo sapiens GN=GIT1 PE=1 SV=2                 | 0.00<br>374<br>5 | 3.60<br>005<br>7 | yes |
| FHOD1_HUMAN | FH1/FH2 domain-containing protein 1 OS=Homo sapiens GN=FHOD1 PE=1 SV=3               | 0.00<br>031<br>6 | 3.59<br>742<br>3 | yes |
| TBC8B_HUMAN | TBC1 domain family member 8B OS=Homo sapiens GN=TBC1D8B PE=1 SV=2                    | 0.00<br>706<br>1 | 3.58<br>862<br>3 | yes |
| CSN6_HUMAN  | COP9 signalosome complex subunit 6 OS=Homo sapiens GN=COPS6 PE=1 SV=1                | 0.00<br>789      | 3.57<br>470<br>3 | yes |
| CRCM_HUMAN  | Colorectal mutant cancer protein OS=Homo sapiens GN=MCC PE=1 SV=2                    | 0.00<br>137<br>7 | 3.57<br>372<br>2 | yes |
| TUT7_HUMAN  | Terminal uridylyltransferase 7 OS=Homo sapiens GN=ZCCHC6 PE=1 SV=1                   | 0.00<br>154<br>9 | 3.56<br>234<br>9 | yes |
| FND3B_HUMAN | Fibronectin type III domain-containing protein 3B OS=Homo sapiens GN=FND3B PE=1 SV=2 | 0.00<br>358<br>7 | 3.56<br>133<br>2 | yes |
| ATG9A_HUMAN | Autophagy-related protein 9A OS=Homo sapiens GN=ATG9A PE=1 SV=3                      | 0.03<br>311<br>1 | 3.55<br>359<br>9 | yes |
| GTPB1_HUMAN | GTP-binding protein 1 OS=Homo sapiens OX=9606 GN=GTPBP1 PE=1 SV=3                    | 0.00<br>203<br>2 | 3.55<br>155<br>5 | yes |
| ZNFX1_HUMAN | NFX1-type zinc finger-containing protein 1 OS=Homo sapiens GN=ZNFX1 PE=2 SV=2        | 0.00<br>066<br>8 | 3.55<br>016      | yes |
| GIMA7_HUMAN | GTPase IMAP family member 7 OS=Homo sapiens GN=GIMAP7 PE=1 SV=1                      | 0.01<br>809<br>2 | 3.54<br>609<br>2 | yes |

|             |                                                                                       |                  |                  |     |
|-------------|---------------------------------------------------------------------------------------|------------------|------------------|-----|
| ARI1_HUMAN  | E3 ubiquitin-protein ligase ARIH1 OS=Homo sapiens OX=9606 GN=ARIH1 PE=1 SV=2          | 0.01<br>953<br>6 | 3.54<br>408<br>9 | yes |
| AGM1_HUMAN  | Phosphoacetylglucosamine mutase OS=Homo sapiens OX=9606 GN=PGM3 PE=1 SV=1             | 0.04<br>953<br>4 | 3.53<br>670<br>3 | yes |
| SHLB1_HUMAN | Endophilin-B1 OS=Homo sapiens GN=SH3GLB1 PE=1 SV=1                                    | 0.01<br>218<br>1 | 3.53<br>548<br>9 | yes |
| CSN7B_HUMAN | COP9 signalosome complex subunit 7b OS=Homo sapiens OX=9606 GN=COPS7B PE=1 SV=1       | 0.01<br>669      | 3.52<br>667<br>1 | yes |
| SHRM4_HUMAN | Protein Shroom4 OS=Homo sapiens GN=SHROOM4 PE=1 SV=3                                  | 0.01<br>815<br>8 | 3.52<br>531<br>3 | yes |
| GBP4_HUMAN  | Guanylate-binding protein 4 OS=Homo sapiens GN=GBP4 PE=2 SV=2                         | 0.02<br>241<br>1 | 3.51<br>291<br>1 | yes |
| COG1_HUMAN  | Conserved oligomeric Golgi complex subunit 1 OS=Homo sapiens GN=COG1 PE=1 SV=1        | 0.04<br>791<br>2 | 3.50<br>921<br>4 | yes |
| STAT3_HUMAN | Signal transducer and activator of transcription 3 OS=Homo sapiens GN=STAT3 PE=1 SV=2 | 0.00<br>393      | 3.49<br>512<br>3 | yes |
| E2AK4_HUMAN | eIF-2-alpha kinase GCN2 OS=Homo sapiens OX=9606 GN=EIF2AK4 PE=1 SV=3                  | 0.01<br>599<br>1 | 3.48<br>670<br>2 | yes |
| UBP10_HUMAN | Ubiquitin carboxyl-terminal hydrolase 10 OS=Homo sapiens GN=USP10 PE=1 SV=2           | 8.82<br>E-<br>05 | 3.46<br>251<br>7 | yes |
| TIE2_HUMAN  | Angiopoietin-1 receptor OS=Homo sapiens GN=TEK PE=1 SV=2                              | 0.01<br>059<br>9 | 3.45<br>797<br>4 | yes |
| FBLI1_HUMAN | Filamin-binding LIM protein 1 OS=Homo sapiens GN=FBLIM1 PE=1 SV=2                     | 0.00<br>020<br>1 | 3.45<br>707<br>3 | yes |

|             |                                                                                                   |          |          |     |
|-------------|---------------------------------------------------------------------------------------------------|----------|----------|-----|
| MAP1A_HUMAN | Microtubule-associated protein 1A OS=Homo sapiens OX=9606 GN=MAP1A PE=1 SV=6                      | 0.03013  | 3.455092 | yes |
| SYNJ2_HUMAN | Synaptojanin-2 OS=Homo sapiens GN=SYNJ2 PE=1 SV=3                                                 | 0.000615 | 3.446798 | yes |
| KPCD2_HUMAN | Serine/threonine-protein kinase D2 OS=Homo sapiens GN=PRKD2 PE=1 SV=2                             | 0.001747 | 3.445847 | yes |
| DNMBP_HUMAN | Dynamin-binding protein OS=Homo sapiens GN=DNMBP PE=1 SV=1                                        | 7.90E-08 | 3.44382  | yes |
| ANXA7_HUMAN | Annexin A7 OS=Homo sapiens GN=ANXA7 PE=1 SV=3                                                     | 1.75E-06 | 3.411313 | yes |
| KPCI_HUMAN  | Protein kinase C iota type OS=Homo sapiens OX=9606 GN=PRKCI PE=1 SV=2                             | 0.012207 | 3.409931 | yes |
| ERG_HUMAN   | Transcriptional regulator ERG OS=Homo sapiens GN=ERG PE=1 SV=2                                    | 0.019633 | 3.405113 | yes |
| SACS_HUMAN  | Saccin OS=Homo sapiens GN=SACS PE=1 SV=2                                                          | 0.036419 | 3.380539 | yes |
| UB2L6_HUMAN | Ubiquitin/ISG15-conjugating enzyme E2 L6 OS=Homo sapiens OX=9606 GN=UBE2L6 PE=1 SV=4              | 0.012175 | 3.367098 | yes |
| PRC2B_HUMAN | Protein PRRC2B OS=Homo sapiens GN=PRRC2B PE=1 SV=2                                                | 0.049515 | 3.364597 | yes |
| DC1L1_HUMAN | Cytoplasmic dynein 1 light intermediate chain 1 OS=Homo sapiens GN=DYNC1LI1 PE=1 SV=3             | 1.40E-06 | 3.356343 | yes |
| VPS16_HUMAN | Vacuolar protein sorting-associated protein 16 homolog OS=Homo sapiens OX=9606 GN=VPS16 PE=1 SV=2 | 0.0004   | 3.353601 | yes |

|                     |                                                                                                           |                  |                  |     |
|---------------------|-----------------------------------------------------------------------------------------------------------|------------------|------------------|-----|
| NRCA<br>M_HU<br>MAN | Neuronal cell adhesion molecule OS=Homo sapiens GN=NRCAM PE=1 SV=3                                        | 0.02<br>804<br>4 | 3.33<br>439<br>5 | yes |
| PYRG1<br>_HUM<br>AN | CTP synthase 1 OS=Homo sapiens GN=CTPS1 PE=1 SV=2                                                         | 0.00<br>347<br>6 | 3.31<br>777<br>4 | yes |
| AKA11<br>_HUM<br>AN | A-kinase anchor protein 11 OS=Homo sapiens OX=9606 GN=AKAP11 PE=1 SV=1                                    | 0.04<br>882<br>9 | 3.31<br>369<br>2 | yes |
| USO1_<br>HUMA<br>N  | General vesicular transport factor p115 OS=Homo sapiens GN=USO1 PE=1 SV=2                                 | 0.00<br>072<br>1 | 3.30<br>912<br>9 | yes |
| UBP15_<br>HUMA<br>N | Ubiquitin carboxyl-terminal hydrolase 15 OS=Homo sapiens GN=USP15 PE=1 SV=3                               | 0.00<br>368<br>8 | 3.30<br>900<br>9 | yes |
| ASAP1<br>_HUM<br>AN | Arf-GAP with SH3 domain, ANK repeat and PH domain-containing protein 1 OS=Homo sapiens GN=ASAP1 PE=1 SV=4 | 0.02<br>334<br>3 | 3.30<br>840<br>2 | yes |
| WDR11<br>_HUM<br>AN | WD repeat-containing protein 11 OS=Homo sapiens GN=WDR11 PE=1 SV=1                                        | 0.00<br>130<br>5 | 3.30<br>396<br>7 | yes |
| ZDH13<br>_HUM<br>AN | Palmitoyltransferase ZDHHC13 OS=Homo sapiens GN=ZDHHC13 PE=1 SV=3                                         | 0.00<br>423<br>8 | 3.30<br>211<br>3 | yes |
| ITA2_H<br>UMAN      | Integrin alpha-2 OS=Homo sapiens GN=ITGA2 PE=1 SV=1                                                       | 0.03<br>621<br>3 | 3.30<br>018<br>1 | yes |
| PAXI_<br>HUMA<br>N  | Paxillin OS=Homo sapiens GN=PXN PE=1 SV=3                                                                 | 0.00<br>603<br>5 | 3.28<br>900<br>3 | yes |
| WFS1_<br>HUMA<br>N  | Wolframin OS=Homo sapiens OX=9606 GN=WFS1 PE=1 SV=2                                                       | 0.02<br>080<br>6 | 3.28<br>404      | yes |
| AT2B4_<br>HUMA<br>N | Plasma membrane calcium-transporting ATPase 4 OS=Homo sapiens OX=9606 GN=ATP2B4 PE=1 SV=2                 | 0.02<br>175<br>7 | 3.28<br>037<br>9 | yes |

|             |                                                                                                         |          |          |     |
|-------------|---------------------------------------------------------------------------------------------------------|----------|----------|-----|
| ANFY1_HUMAN | Rabankyrin-5 OS=Homo sapiens GN=ANKFY1 PE=1 SV=2                                                        | 0.000504 | 3.277315 | yes |
| ANX11_HUMAN | Annexin A11 OS=Homo sapiens GN=ANXA11 PE=1 SV=1                                                         | 1.27E-07 | 3.273349 | yes |
| TRIP6_HUMAN | Thyroid receptor-interacting protein 6 OS=Homo sapiens GN=TRIP6 PE=1 SV=3                               | 0.004962 | 3.270674 | yes |
| KIF1C_HUMAN | Kinesin-like protein KIF1C OS=Homo sapiens OX=9606 GN=KIF1C PE=1 SV=3                                   | 0.04425  | 3.269552 | yes |
| DGKA_HUMAN  | Diacylglycerol kinase alpha OS=Homo sapiens GN=DGKA PE=1 SV=3                                           | 0.011123 | 3.267107 | yes |
| SBP2L_HUMAN | Selenocysteine insertion sequence-binding protein 2-like OS=Homo sapiens OX=9606 GN=SECISBP2L PE=1 SV=3 | 0.04568  | 3.26244  | yes |
| NEDD4_HUMAN | E3 ubiquitin-protein ligase NEDD4 OS=Homo sapiens GN=NEDD4 PE=1 SV=4                                    | 0.008669 | 3.255339 | yes |
| AMPD2_HUMAN | AMP deaminase 2 OS=Homo sapiens GN=AMPD2 PE=1 SV=2                                                      | 0.002221 | 3.252122 | yes |
| AFAP1_HUMAN | Actin filament-associated protein 1 OS=Homo sapiens GN=AFAP1 PE=1 SV=2                                  | 0.013147 | 3.23896  | yes |
| AAPK1_HUMAN | 5'-AMP-activated protein kinase catalytic subunit alpha-1 OS=Homo sapiens GN=PRKAA1 PE=1 SV=4           | 0.016363 | 3.226205 | yes |
| BICD2_HUMAN | Protein bicaudal D homolog 2 OS=Homo sapiens OX=9606 GN=BICD2 PE=1 SV=1                                 | 0.00878  | 3.220846 | yes |
| ANKL2_HUMAN | Ankyrin repeat and LEM domain-containing protein 2 OS=Homo sapiens OX=9606 GN=ANKLE2 PE=1 SV=4          | 0.02288  | 3.211997 | yes |

|             |                                                                                        |              |              |     |
|-------------|----------------------------------------------------------------------------------------|--------------|--------------|-----|
| LIPB1_HUMAN | Liprin-beta-1 OS=Homo sapiens GN=PPFIBP1 PE=1 SV=2                                     | 8.69<br>E-05 | 3.17<br>5996 | yes |
| JAK1_HUMAN  | Tyrosine-protein kinase JAK1 OS=Homo sapiens GN=JAK1 PE=1 SV=2                         | 0.00<br>1558 | 3.16<br>0606 | yes |
| ZO2_HUMAN   | Tight junction protein ZO-2 OS=Homo sapiens GN=TJP2 PE=1 SV=2                          | 3.17<br>E-10 | 3.15<br>7277 | yes |
| SCFD1_HUMAN | Sec1 family domain-containing protein 1 OS=Homo sapiens GN=SCFD1 PE=1 SV=4             | 0.00<br>4558 | 3.15<br>304  | yes |
| UBR4_HUMAN  | E3 ubiquitin-protein ligase UBR4 OS=Homo sapiens GN=UBR4 PE=1 SV=1                     | 4.66<br>E-05 | 3.14<br>8925 | yes |
| DOCK6_HUMAN | Dedicator of cytokinesis protein 6 OS=Homo sapiens GN=DOCK6 PE=1 SV=3                  | 2.25<br>E-05 | 3.14<br>2073 | yes |
| COG6_HUMAN  | Conserved oligomeric Golgi complex subunit 6 OS=Homo sapiens OX=9606 GN=COG6 PE=1 SV=2 | 0.00<br>2358 | 3.14<br>0957 | yes |
| WDR61_HUMAN | WD repeat-containing protein 61 OS=Homo sapiens GN=WDR61 PE=1 SV=1                     | 0.00<br>1138 | 3.13<br>777  | yes |
| ZO1_HUMAN   | Tight junction protein ZO-1 OS=Homo sapiens GN=TJP1 PE=1 SV=3                          | 7.95<br>E-08 | 3.13<br>5628 | yes |
| CE170_HUMAN | Centrosomal protein of 170 kDa OS=Homo sapiens GN=CEP170 PE=1 SV=1                     | 0.00<br>0113 | 3.13<br>4352 | yes |
| HUWE1_HUMAN | E3 ubiquitin-protein ligase HUWE1 OS=Homo sapiens GN=HUWE1 PE=1 SV=3                   | 1.72<br>E-05 | 3.13<br>2904 | yes |
| SMC4_HUMAN  | Structural maintenance of chromosomes protein 4 OS=Homo sapiens GN=SMC4 PE=1 SV=2      | 1.75<br>E-05 | 3.12<br>0667 | yes |



|             |                                                                                                                 |          |          |     |
|-------------|-----------------------------------------------------------------------------------------------------------------|----------|----------|-----|
| MTA1_HUMAN  | Metastasis-associated protein MTA1 OS=Homo sapiens GN=MTA1 PE=1 SV=2                                            | 0.02306  | 3.117027 | yes |
| SC23A_HUMAN | Protein transport protein Sec23A OS=Homo sapiens GN=SEC23A PE=1 SV=2                                            | 0.000508 | 3.110124 | yes |
| ANR17_HUMAN | Ankyrin repeat domain-containing protein 17 OS=Homo sapiens GN=ANKRD17 PE=1 SV=3                                | 0.049152 | 3.102161 | yes |
| RAB13_HUMAN | Ras-related protein Rab-13 OS=Homo sapiens GN=RAB13 PE=1 SV=1                                                   | 0.019251 | 3.102159 | yes |
| Z3H7B_HUMAN | Zinc finger CCCH domain-containing protein 7B OS=Homo sapiens GN=ZC3H7B PE=1 SV=1                               | 0.00141  | 3.09876  | yes |
| ITF2_HUMAN  | Transcription factor 4 OS=Homo sapiens OX=9606 GN=TCF4 PE=1 SV=3                                                | 0.045388 | 3.096398 | yes |
| ANR52_HUMAN | Serine/threonine-protein phosphatase 6 regulatory ankyrin repeat subunit C OS=Homo sapiens GN=ANKRD52 PE=1 SV=3 | 0.021957 | 3.09204  | yes |
| PLAK_HUMAN  | Junction plakoglobin OS=Homo sapiens GN=JUP PE=1 SV=3                                                           | 0.004032 | 3.086176 | yes |
| NUMB_HUMAN  | Protein numb homolog OS=Homo sapiens GN=NUMB PE=1 SV=2                                                          | 0.006342 | 3.082983 | yes |
| UBE3C_HUMAN | Ubiquitin-protein ligase E3C OS=Homo sapiens GN=UBE3C PE=1 SV=3                                                 | 0.02612  | 3.070447 | yes |
| TBL2_HUMAN  | Transducin beta-like protein 2 OS=Homo sapiens GN=TBL2 PE=1 SV=1                                                | 0.013051 | 3.05806  | yes |
| PUR6_HUMAN  | Multifunctional protein ADE2 OS=Homo sapiens GN=PAICS PE=1 SV=3                                                 | 1.44E-05 | 3.049092 | yes |

|             |                                                                                     |          |          |     |
|-------------|-------------------------------------------------------------------------------------|----------|----------|-----|
| AAKG1_HUMAN | 5'-AMP-activated protein kinase subunit gamma-1 OS=Homo sapiens GN=PRKAG1 PE=1 SV=1 | 0.014403 | 3.031809 | yes |
| ITPR3_HUMAN | Inositol 1,4,5-trisphosphate receptor type 3 OS=Homo sapiens GN=ITPR3 PE=1 SV=2     | 1.99E-07 | 3.022986 | yes |
| VP33B_HUMAN | Vacuolar protein sorting-associated protein 33B OS=Homo sapiens GN=VPS33B PE=1 SV=2 | 0.015053 | 3.002211 | yes |
| DDX60_HUMAN | Probable ATP-dependent RNA helicase DDX60 OS=Homo sapiens GN=DDX60 PE=1 SV=3        | 0.008404 | 2.982682 | yes |
| CYFP2_HUMAN | Cytoplasmic FMR1-interacting protein 2 OS=Homo sapiens GN=CYFIP2 PE=1 SV=2          | 0.004239 | 2.980521 | yes |
| DPYL3_HUMAN | Dihydropyrimidinase-related protein 3 OS=Homo sapiens GN=DPYSL3 PE=1 SV=1           | 2.38E-06 | 2.977115 | yes |
| PLIN3_HUMAN | Perilipin-3 OS=Homo sapiens GN=PLIN3 PE=1 SV=3                                      | 0.000129 | 2.949853 | yes |
| ARHG2_HUMAN | Rho guanine nucleotide exchange factor 2 OS=Homo sapiens GN=ARHGEF2 PE=1 SV=4       | 0.000207 | 2.946313 | yes |
| BIRC6_HUMAN | Baculoviral IAP repeat-containing protein 6 OS=Homo sapiens GN=BIRC6 PE=1 SV=2      | 0.000996 | 2.945416 | yes |
| SH2D3_HUMAN | SH2 domain-containing protein 3C OS=Homo sapiens OX=9606 GN=SH2D3C PE=1 SV=1        | 0.003896 | 2.932081 | yes |
| SPART_HUMAN | Spartin OS=Homo sapiens OX=9606 GN=SPART PE=1 SV=1                                  | 0.004873 | 2.929417 | yes |
| SMG1_HUMAN  | Serine/threonine-protein kinase SMG1 OS=Homo sapiens OX=9606 GN=SMG1 PE=1 SV=3      | 0.033274 | 2.924525 | yes |

|             |                                                                                             |          |          |     |
|-------------|---------------------------------------------------------------------------------------------|----------|----------|-----|
| WDR26_HUMAN | WD repeat-containing protein 26 OS=Homo sapiens OX=9606 GN=WDR26 PE=1 SV=3                  | 0.001361 | 2.921062 | yes |
| PSME1_HUMAN | Proteasome activator complex subunit 1 OS=Homo sapiens GN=PSME1 PE=1 SV=1                   | 0.004019 | 2.920875 | yes |
| HMOX2_HUMAN | Heme oxygenase 2 OS=Homo sapiens GN=HMOX2 PE=1 SV=2                                         | 0.001383 | 2.918622 | yes |
| ANR40_HUMAN | Ankyrin repeat domain-containing protein 40 OS=Homo sapiens GN=ANKRD40 PE=1 SV=2            | 0.020679 | 2.916732 | yes |
| YJ005_HUMAN | Uncharacterized protein FLJ45252 OS=Homo sapiens PE=2 SV=2                                  | 0.000195 | 2.911723 | yes |
| RTN3_HUMAN  | Reticulon-3 OS=Homo sapiens GN=RTN3 PE=1 SV=2                                               | 0.016355 | 2.90905  | yes |
| CMC2_HUMAN  | Calcium-binding mitochondrial carrier protein Aralar2 OS=Homo sapiens GN=SLC25A13 PE=1 SV=2 | 0.018938 | 2.894915 | yes |
| SNTB2_HUMAN | Beta-2-syntrophin OS=Homo sapiens GN=SNTB2 PE=1 SV=1                                        | 9.36E-06 | 2.890111 | yes |
| BAG5_HUMAN  | BAG family molecular chaperone regulator 5 OS=Homo sapiens OX=9606 GN=BAG5 PE=1 SV=1        | 0.009985 | 2.88688  | yes |
| RIR1_HUMAN  | Ribonucleoside-diphosphate reductase large subunit OS=Homo sapiens GN=RRM1 PE=1 SV=1        | 3.92E-07 | 2.884999 | yes |
| EMC3_HUMAN  | ER membrane protein complex subunit 3 OS=Homo sapiens GN=EMC3 PE=1 SV=3                     | 0.04484  | 2.884708 | yes |
| STRN4_HUMAN | Striatin-4 OS=Homo sapiens GN=STRN4 PE=1 SV=2                                               | 0.004593 | 2.880225 | yes |

|             |                                                                                                 |          |          |     |
|-------------|-------------------------------------------------------------------------------------------------|----------|----------|-----|
| GGOB1_HUMAN | Golgin subfamily B member 1 OS=Homo sapiens GN=GOLGB1 PE=1 SV=2                                 | 0.008866 | 2.87748  | yes |
| PIEZ1_HUMAN | Piezo-type mechanosensitive ion channel component 1 OS=Homo sapiens OX=9606 GN=PIEZO1 PE=1 SV=4 | 0.013855 | 2.865428 | yes |
| RHG07_HUMAN | Rho GTPase-activating protein 7 OS=Homo sapiens OX=9606 GN=DLC1 PE=1 SV=4                       | 0.04344  | 2.864569 | yes |
| TBCB_HUMAN  | Tubulin-folding cofactor B OS=Homo sapiens OX=9606 GN=TBCB PE=1 SV=2                            | 0.042841 | 2.855953 | yes |
| COBL1_HUMAN | Cordon-bleu protein-like 1 OS=Homo sapiens GN=COBLL1 PE=1 SV=2                                  | 0.044269 | 2.853283 | yes |
| DDX3Y_HUMAN | ATP-dependent RNA helicase DDX3Y OS=Homo sapiens GN=DDX3Y PE=1 SV=2                             | 0.009314 | 2.848875 | yes |
| GCN1_HUMAN  | eIF-2-alpha kinase activator GCN1 OS=Homo sapiens OX=9606 GN=GCN1 PE=1 SV=6                     | 0.002891 | 2.84711  | yes |
| SC31A_HUMAN | Protein transport protein Sec31A OS=Homo sapiens GN=SEC31A PE=1 SV=3                            | 0.00063  | 2.837775 | yes |
| CLCA_HUMAN  | Clathrin light chain A OS=Homo sapiens GN=CLTA PE=1 SV=1                                        | 4.60E-05 | 2.833943 | yes |
| LACTB_HUMAN | Serine beta-lactamase-like protein LACTB, mitochondrial OS=Homo sapiens GN=LACTB PE=1 SV=2      | 0.019898 | 2.826217 | yes |
| SQSTM_HUMAN | Sequestosome-1 OS=Homo sapiens GN=SQSTM1 PE=1 SV=1                                              | 0.009545 | 2.81717  | yes |
| ITA6_HUMAN  | Integrin alpha-6 OS=Homo sapiens GN=ITGA6 PE=1 SV=5                                             | 0.035236 | 2.813372 | yes |

|             |                                                                                                       |          |          |     |
|-------------|-------------------------------------------------------------------------------------------------------|----------|----------|-----|
| CTND1_HUMAN | Catenin delta-1 OS=Homo sapiens GN=CTNND1 PE=1 SV=1                                                   | 9.77E-06 | 2.811632 | yes |
| YES_HUMAN   | Tyrosine-protein kinase Yes OS=Homo sapiens GN=YES1 PE=1 SV=3                                         | 0.021222 | 2.793766 | yes |
| HERC4_HUMAN | Probable E3 ubiquitin-protein ligase HERC4 OS=Homo sapiens GN=HERC4 PE=1 SV=1                         | 0.035912 | 2.792046 | yes |
| GGYF2_HUMAN | GRB10-interacting GYF protein 2 OS=Homo sapiens OX=9606 GN=GIGYF2 PE=1 SV=1                           | 0.012462 | 2.789887 | yes |
| GCP2_HUMAN  | Gamma-tubulin complex component 2 OS=Homo sapiens OX=9606 GN=TUBGCP2 PE=1 SV=2                        | 0.035631 | 2.789782 | yes |
| UCRIL_HUMAN | Putative cytochrome b-c1 complex subunit Rieske-like protein 1 OS=Homo sapiens GN=UQCRFS1P1 PE=5 SV=1 | 0.02824  | 2.778162 | yes |
| BAG6_HUMAN  | Large proline-rich protein BAG6 OS=Homo sapiens GN=BAG6 PE=1 SV=2                                     | 0.011853 | 2.771482 | yes |
| CTNB1_HUMAN | Catenin beta-1 OS=Homo sapiens GN=CTNNB1 PE=1 SV=1                                                    | 0.000815 | 2.763462 | yes |
| SH3K1_HUMAN | SH3 domain-containing kinase-binding protein 1 OS=Homo sapiens GN=SH3KBP1 PE=1 SV=2                   | 0.008426 | 2.7626   | yes |
| NOMO1_HUMAN | Nodal modulator 1 OS=Homo sapiens GN=NOMO1 PE=1 SV=5                                                  | 0.038195 | 2.757477 | yes |
| KDIS_HUMAN  | Kinase D-interacting substrate of 220 kDa OS=Homo sapiens OX=9606 GN=KIDINS220 PE=1 SV=3              | 0.023381 | 2.755476 | yes |
| MTA2_HUMAN  | Metastasis-associated protein MTA2 OS=Homo sapiens GN=MTA2 PE=1 SV=1                                  | 0.005013 | 2.74892  | yes |

|             |                                                                                                             |          |          |     |
|-------------|-------------------------------------------------------------------------------------------------------------|----------|----------|-----|
| UBP8_HUMAN  | Ubiquitin carboxyl-terminal hydrolase 8 OS=Homo sapiens GN=USP8 PE=1 SV=1                                   | 0.017916 | 2.744861 | yes |
| TRI65_HUMAN | Tripartite motif-containing protein 65 OS=Homo sapiens OX=9606 GN=TRIM65 PE=1 SV=3                          | 0.03905  | 2.742236 | yes |
| PGS1_HUMAN  | Biglycan OS=Homo sapiens GN=BGN PE=1 SV=2                                                                   | 0.037019 | 2.733782 | yes |
| VATH_HUMAN  | V-type proton ATPase subunit H OS=Homo sapiens GN=ATP6V1H PE=1 SV=1                                         | 0.00196  | 2.717903 | yes |
| PP2BA_HUMAN | Serine/threonine-protein phosphatase 2B catalytic subunit alpha isoform OS=Homo sapiens GN=PPP3CA PE=1 SV=1 | 0.035375 | 2.711553 | yes |
| PAWR_HUMAN  | PRKC apoptosis WT1 regulator protein OS=Homo sapiens GN=PAWR PE=1 SV=1                                      | 0.000103 | 2.708823 | yes |
| SPD2B_HUMAN | SH3 and PX domain-containing protein 2B OS=Homo sapiens GN=SH3PXD2B PE=1 SV=3                               | 0.000208 | 2.698532 | yes |
| TBC15_HUMAN | TBC1 domain family member 15 OS=Homo sapiens GN=TBC1D15 PE=1 SV=2                                           | 0.015892 | 2.689576 | yes |
| OASL_HUMAN  | 2'-5'-oligoadenylate synthase-like protein OS=Homo sapiens GN=OASL PE=1 SV=2                                | 0.003487 | 2.684098 | yes |
| PTPRE_HUMAN | Receptor-type tyrosine-protein phosphatase epsilon OS=Homo sapiens GN=PTPRE PE=1 SV=1                       | 0.032362 | 2.682828 | yes |
| NU214_HUMAN | Nuclear pore complex protein Nup214 OS=Homo sapiens GN=NUP214 PE=1 SV=2                                     | 0.006559 | 2.678263 | yes |
| TTC37_HUMAN | Tetratricopeptide repeat protein 37 OS=Homo sapiens GN=TTC37 PE=1 SV=1                                      | 0.012297 | 2.670909 | yes |

|             |                                                                                                      |                  |                  |     |
|-------------|------------------------------------------------------------------------------------------------------|------------------|------------------|-----|
| STK10_HUMAN | Serine/threonine-protein kinase 10 OS=Homo sapiens GN=STK10 PE=1 SV=1                                | 0.02<br>239<br>1 | 2.66<br>909<br>2 | yes |
| NXP20_HUMAN | Protein NOXP20 OS=Homo sapiens GN=FAM114A1 PE=1 SV=2                                                 | 0.00<br>937<br>2 | 2.66<br>315<br>7 | yes |
| VATD_HUMAN  | V-type proton ATPase subunit D OS=Homo sapiens OX=9606 GN=ATP6V1D PE=1 SV=1                          | 0.00<br>352<br>6 | 2.66<br>079<br>6 | yes |
| RM38_HUMAN  | 39S ribosomal protein L38, mitochondrial OS=Homo sapiens GN=MRPL38 PE=1 SV=2                         | 0.03<br>985<br>2 | 2.65<br>862<br>9 | yes |
| PLCG1_HUMAN | 1-phosphatidylinositol 4,5-bisphosphate phosphodiesterase gamma-1 OS=Homo sapiens GN=PLCG1 PE=1 SV=1 | 0.00<br>318<br>7 | 2.65<br>498      | yes |
| SYQ_HUMAN   | Glutamine--tRNA ligase OS=Homo sapiens GN=QARS PE=1 SV=1                                             | 0.00<br>348<br>1 | 2.64<br>162<br>6 | yes |
| FUBP3_HUMAN | Far upstream element-binding protein 3 OS=Homo sapiens GN=FUBP3 PE=1 SV=2                            | 0.02<br>786<br>3 | 2.63<br>878<br>1 | yes |
| IL6RB_HUMAN | Interleukin-6 receptor subunit beta OS=Homo sapiens GN=IL6ST PE=1 SV=2                               | 0.00<br>447<br>1 | 2.62<br>695      | yes |
| ESYT2_HUMAN | Extended synaptotagmin-2 OS=Homo sapiens GN=ESYT2 PE=1 SV=1                                          | 0.00<br>289<br>5 | 2.62<br>588<br>9 | yes |
| DAPK1_HUMAN | Death-associated protein kinase 1 OS=Homo sapiens GN=DAPK1 PE=1 SV=6                                 | 0.04<br>533      | 2.62<br>557<br>8 | yes |
| BAG3_HUMAN  | BAG family molecular chaperone regulator 3 OS=Homo sapiens GN=BAG3 PE=1 SV=3                         | 0.00<br>087<br>6 | 2.62<br>239<br>4 | yes |
| EXOC7_HUMAN | Exocyst complex component 7 OS=Homo sapiens OX=9606 GN=EXOC7 PE=1 SV=3                               | 0.00<br>709<br>4 | 2.59<br>663<br>1 | yes |

|              |                                                                                    |          |          |     |
|--------------|------------------------------------------------------------------------------------|----------|----------|-----|
| SMAD3_HUMAN  | Mothers against decapentaplegic homolog 3 OS=Homo sapiens GN=SMAD3 PE=1 SV=1       | 0.020988 | 2.588626 | yes |
| SPTC2_HUMAN  | Serine palmitoyltransferase 2 OS=Homo sapiens GN=SPTLC2 PE=1 SV=1                  | 0.000275 | 2.583911 | yes |
| RSF1_HUMAN   | Remodeling and spacing factor 1 OS=Homo sapiens OX=9606 GN=RSF1 PE=1 SV=2          | 0.035875 | 2.573226 | yes |
| AGO2_HUMAN   | Protein argonaute-2 OS=Homo sapiens GN=AGO2 PE=1 SV=3                              | 0.012154 | 2.5665   | yes |
| PLS1_HUMAN   | Plastin-1 OS=Homo sapiens GN=PLS1 PE=1 SV=2                                        | 0.007351 | 2.559032 | yes |
| SYNPO_HUMAN  | Synaptopodin OS=Homo sapiens GN=SYNPO PE=1 SV=2                                    | 0.001596 | 2.555301 | yes |
| ZYX_HUMAN    | Zyxin OS=Homo sapiens GN=ZYX PE=1 SV=1                                             | 0.000735 | 2.550122 | yes |
| XPO7_HUMAN   | Exportin-7 OS=Homo sapiens GN=XPO7 PE=1 SV=3                                       | 0.034776 | 2.548781 | yes |
| MINK1_HUMAN  | Misshapen-like kinase 1 OS=Homo sapiens GN=MINK1 PE=1 SV=2                         | 0.011815 | 2.543736 | yes |
| TRIP12_HUMAN | E3 ubiquitin-protein ligase TRIP12 OS=Homo sapiens GN=TRIP12 PE=1 SV=1             | 0.000278 | 2.543536 | yes |
| ATXN2_HUMAN  | Ataxin-2 OS=Homo sapiens GN=ATXN2 PE=1 SV=2                                        | 0.004807 | 2.539583 | yes |
| TMCC3_HUMAN  | Transmembrane and coiled-coil domains protein 3 OS=Homo sapiens GN=TMCC3 PE=2 SV=3 | 0.02009  | 2.535275 | yes |



|             |                                                                                 |            |            |     |
|-------------|---------------------------------------------------------------------------------|------------|------------|-----|
| FKB1A_HUMAN | Peptidyl-prolyl cis-trans isomerase FKBP1A OS=Homo sapiens GN=FKBP1A PE=1 SV=2  | 7.18 E-05  | 2.52 694   | yes |
| MTMR5_HUMAN | Myotubularin-related protein 5 OS=Homo sapiens OX=9606 GN=SBF1 PE=1 SV=4        | 0.01 158 8 | 2.52 420 7 | yes |
| PDLI4_HUMAN | PDZ and LIM domain protein 4 OS=Homo sapiens GN=PDLIM4 PE=1 SV=2                | 0.00 089 1 | 2.51 832 8 | yes |
| CDK9_HUMAN  | Cyclin-dependent kinase 9 OS=Homo sapiens GN=CDK9 PE=1 SV=3                     | 0.01 347 1 | 2.51 773 3 | yes |
| GLRX3_HUMAN | Glutaredoxin-3 OS=Homo sapiens GN=GLRX3 PE=1 SV=2                               | 0.00 850 5 | 2.51 578 3 | yes |
| RIN1_HUMAN  | Ras and Rab interactor 1 OS=Homo sapiens GN=RIN1 PE=1 SV=4                      | 0.04 263 5 | 2.51 304 3 | yes |
| KINH_HUMAN  | Kinesin-1 heavy chain OS=Homo sapiens GN=KIF5B PE=1 SV=1                        | 8.36 E-09  | 2.51 241 7 | yes |
| TOR4A_HUMAN | Torsin-4A OS=Homo sapiens OX=9606 GN=TOR4A PE=1 SV=2                            | 0.01 561 8 | 2.51 109 4 | yes |
| OSBL3_HUMAN | Oxysterol-binding protein-related protein 3 OS=Homo sapiens GN=OSBPL3 PE=1 SV=1 | 0.00 031 9 | 2.51 098 7 | yes |
| CAV1_HUMAN  | Caveolin-1 OS=Homo sapiens GN=CAV1 PE=1 SV=4                                    | 0.00 014 7 | 2.50 881   | yes |
| BMX_HUMAN   | Cytoplasmic tyrosine-protein kinase BMX OS=Homo sapiens GN=BMX PE=1 SV=1        | 0.02 892   | 2.50 551 2 | yes |
| NAGK_HUMAN  | N-acetyl-D-glucosamine kinase OS=Homo sapiens GN=NAGK PE=1 SV=4                 | 0.00 140 9 | 2.49 674 2 | yes |

|             |                                                                                                    |                  |                  |     |
|-------------|----------------------------------------------------------------------------------------------------|------------------|------------------|-----|
| TOM1_HUMAN  | Target of Myb protein 1 OS=Homo sapiens GN=TOM1 PE=1 SV=2                                          | 0.02<br>427<br>1 | 2.49<br>030<br>1 | yes |
| KANK3_HUMAN | KN motif and ankyrin repeat domain-containing protein 3 OS=Homo sapiens OX=9606 GN=KANK3 PE=1 SV=1 | 0.03<br>336<br>5 | 2.48<br>436<br>1 | yes |
| M4K5_HUMAN  | Mitogen-activated protein kinase kinase kinase 5 OS=Homo sapiens OX=9606 GN=MAP4K5 PE=1 SV=2       | 0.03<br>405<br>6 | 2.46<br>849<br>4 | yes |
| DP13A_HUMAN | DCC-interacting protein 13-alpha OS=Homo sapiens GN=APPL1 PE=1 SV=1                                | 0.03<br>708<br>9 | 2.46<br>791      | yes |
| SORCN_HUMAN | Sorcin OS=Homo sapiens GN=SRI PE=1 SV=1                                                            | 0.00<br>426<br>8 | 2.45<br>833<br>1 | yes |
| STAT1_HUMAN | Signal transducer and activator of transcription 1-alpha/beta OS=Homo sapiens GN=STAT1 PE=1 SV=2   | 0.00<br>145<br>8 | 2.45<br>19       | yes |
| RABL6_HUMAN | Rab-like protein 6 OS=Homo sapiens GN=RABL6 PE=1 SV=2                                              | 0.03<br>279<br>3 | 2.44<br>688<br>5 | yes |
| IPO5_HUMAN  | Importin-5 OS=Homo sapiens GN=IPO5 PE=1 SV=4                                                       | 0.00<br>315<br>3 | 2.44<br>587<br>5 | yes |
| UBP47_HUMAN | Ubiquitin carboxyl-terminal hydrolase 47 OS=Homo sapiens GN=USP47 PE=1 SV=3                        | 0.00<br>696<br>6 | 2.44<br>555<br>9 | yes |
| PYR1_HUMAN  | CAD protein OS=Homo sapiens GN=CAD PE=1 SV=3                                                       | 2.43<br>E-<br>05 | 2.43<br>932<br>3 | yes |
| ESYT1_HUMAN | Extended synaptotagmin-1 OS=Homo sapiens GN=ESYT1 PE=1 SV=1                                        | 3.25<br>E-<br>05 | 2.43<br>840<br>3 | yes |
| LAMA3_HUMAN | Laminin subunit alpha-3 OS=Homo sapiens OX=9606 GN=LAMA3 PE=1 SV=2                                 | 0.04<br>182      | 2.42<br>731<br>1 | yes |

|             |                                                                                          |          |          |     |
|-------------|------------------------------------------------------------------------------------------|----------|----------|-----|
| AVEN_HUMAN  | Cell death regulator Aven OS=Homo sapiens GN=AVEN PE=1 SV=1                              | 0.010156 | 2.422521 | yes |
| SYAP1_HUMAN | Synapse-associated protein 1 OS=Homo sapiens GN=SYAP1 PE=1 SV=1                          | 0.002746 | 2.412002 | yes |
| EPIPL_HUMAN | Epiplakin OS=Homo sapiens GN=EPPK1 PE=1 SV=2                                             | 0.010631 | 2.407463 | yes |
| ZCHC8_HUMAN | Zinc finger CCHC domain-containing protein 8 OS=Homo sapiens OX=9606 GN=ZCCHC8 PE=1 SV=2 | 0.034474 | 2.406083 | yes |
| FAS_HUMAN   | Fatty acid synthase OS=Homo sapiens GN=FASN PE=1 SV=3                                    | 1.28E-08 | 2.40477  | yes |
| PFD6_HUMAN  | Prefoldin subunit 6 OS=Homo sapiens OX=9606 GN=PFDN6 PE=1 SV=1                           | 0.038815 | 2.398675 | yes |
| EIF3J_HUMAN | Eukaryotic translation initiation factor 3 subunit J OS=Homo sapiens GN=EIF3J PE=1 SV=2  | 0.007269 | 2.389873 | yes |
| PCH2_HUMAN  | Pachytene checkpoint protein 2 homolog OS=Homo sapiens GN=TRIP13 PE=1 SV=2               | 0.01316  | 2.389264 | yes |
| OGA_HUMAN   | Protein O-GlcNAcase OS=Homo sapiens GN=MGEA5 PE=1 SV=2                                   | 0.004331 | 2.383942 | yes |
| AKA12_HUMAN | A-kinase anchor protein 12 OS=Homo sapiens GN=AKAP12 PE=1 SV=4                           | 1.31E-05 | 2.381823 | yes |
| HCFC1_HUMAN | Host cell factor 1 OS=Homo sapiens GN=HCFC1 PE=1 SV=2                                    | 0.000559 | 2.37945  | yes |
| FAK1_HUMAN  | Focal adhesion kinase 1 OS=Homo sapiens GN=PTK2 PE=1 SV=2                                | 0.014533 | 2.378365 | yes |

|             |                                                                                               |                  |                  |     |
|-------------|-----------------------------------------------------------------------------------------------|------------------|------------------|-----|
| VP13C_HUMAN | Vacuolar protein sorting-associated protein 13C OS=Homo sapiens GN=VPS13C PE=1 SV=1           | 0.01<br>874<br>6 | 2.37<br>280<br>2 | yes |
| PURA_HUMAN  | Transcriptional activator protein Pur-alpha OS=Homo sapiens GN=PURA PE=1 SV=2                 | 0.01<br>433<br>1 | 2.37<br>235<br>3 | yes |
| MYO5A_HUMAN | Unconventional myosin-Va OS=Homo sapiens GN=MYO5A PE=1 SV=2                                   | 5.23<br>E-<br>05 | 2.36<br>839<br>8 | yes |
| ZC11A_HUMAN | Zinc finger CCCH domain-containing protein 11A OS=Homo sapiens OX=9606 GN=ZC3H11A PE=1 SV=3   | 0.03<br>138<br>7 | 2.36<br>540<br>4 | yes |
| GSTO1_HUMAN | Glutathione S-transferase omega-1 OS=Homo sapiens GN=GSTO1 PE=1 SV=2                          | 0.00<br>286<br>3 | 2.35<br>777<br>5 | yes |
| UBA6_HUMAN  | Ubiquitin-like modifier-activating enzyme 6 OS=Homo sapiens GN=UBA6 PE=1 SV=1                 | 0.00<br>925<br>6 | 2.35<br>253<br>7 | yes |
| GEM15_HUMAN | Gem-associated protein 5 OS=Homo sapiens GN=GEMIN5 PE=1 SV=3                                  | 0.00<br>079<br>2 | 2.35<br>101<br>2 | yes |
| NU155_HUMAN | Nuclear pore complex protein Nup155 OS=Homo sapiens GN=NUP155 PE=1 SV=1                       | 0.01<br>999<br>3 | 2.34<br>230<br>7 | yes |
| VRK2_HUMAN  | Serine/threonine-protein kinase VRK2 OS=Homo sapiens GN=VRK2 PE=1 SV=3                        | 0.00<br>731<br>5 | 2.33<br>841<br>9 | yes |
| FKB15_HUMAN | FK506-binding protein 15 OS=Homo sapiens GN=FKBP15 PE=1 SV=2                                  | 0.00<br>198<br>8 | 2.33<br>091<br>8 | yes |
| OGFR_HUMAN  | Opioid growth factor receptor OS=Homo sapiens GN=OGFR PE=1 SV=3                               | 0.00<br>277<br>5 | 2.31<br>752<br>5 | yes |
| MACF1_HUMAN | Microtubule-actin cross-linking factor 1, isoforms 1/2/3/5 OS=Homo sapiens GN=MACF1 PE=1 SV=4 | 6.83<br>E-<br>07 | 2.31<br>671<br>9 | yes |

|             |                                                                                         |          |          |     |
|-------------|-----------------------------------------------------------------------------------------|----------|----------|-----|
| LBR_HUMAN   | Lamin-B receptor OS=Homo sapiens GN=LBR PE=1 SV=2                                       | 0.028438 | 2.306056 | yes |
| ISG15_HUMAN | Ubiquitin-like protein ISG15 OS=Homo sapiens OX=9606 GN=ISG15 PE=1 SV=5                 | 0.033545 | 2.306032 | yes |
| SYCC_HUMAN  | Cysteine--tRNA ligase, cytoplasmic OS=Homo sapiens GN=CARS PE=1 SV=3                    | 0.012876 | 2.302327 | yes |
| SNP23_HUMAN | Synaptosomal-associated protein 23 OS=Homo sapiens GN=SNAP23 PE=1 SV=1                  | 0.003928 | 2.29708  | yes |
| TNPO3_HUMAN | Transportin-3 OS=Homo sapiens OX=9606 GN=TNPO3 PE=1 SV=3                                | 0.013334 | 2.296242 | yes |
| PRC2A_HUMAN | Protein PRRC2A OS=Homo sapiens GN=PRRC2A PE=1 SV=3                                      | 0.002367 | 2.285525 | yes |
| SYLC_HUMAN  | Leucine--tRNA ligase, cytoplasmic OS=Homo sapiens GN=LARS PE=1 SV=2                     | 1.78E-05 | 2.282458 | yes |
| CAMP2_HUMAN | Calmodulin-regulated spectrin-associated protein 2 OS=Homo sapiens GN=CAMSAP2 PE=1 SV=3 | 0.01429  | 2.275567 | yes |
| ATLA3_HUMAN | Atlastin-3 OS=Homo sapiens GN=ATL3 PE=1 SV=1                                            | 0.017002 | 2.269398 | yes |
| DPYL2_HUMAN | Dihydropyrimidinase-related protein 2 OS=Homo sapiens GN=DPYSL2 PE=1 SV=1               | 0.000155 | 2.259449 | yes |
| FLNB_HUMAN  | Filamin-B OS=Homo sapiens GN=FLNB PE=1 SV=2                                             | 2.37E-06 | 2.259098 | yes |
| CLCB_HUMAN  | Clathrin light chain B OS=Homo sapiens GN=CLTB PE=1 SV=1                                | 0.005143 | 2.258816 | yes |

|              |                                                                                                        |          |          |     |
|--------------|--------------------------------------------------------------------------------------------------------|----------|----------|-----|
| PACN2_HUMAN  | Protein kinase C and casein kinase substrate in neurons protein 2 OS=Homo sapiens GN=PACSIN2 PE=1 SV=2 | 0.013119 | 2.257126 | yes |
| CAVN2_HUMAN  | Caveolae-associated protein 2 OS=Homo sapiens OX=9606 GN=CAVIN2 PE=1 SV=3                              | 0.020297 | 2.256187 | yes |
| KBP_HUMAN    | KIF1-binding protein OS=Homo sapiens GN=KIF1BP PE=1 SV=1                                               | 0.0483   | 2.24679  | yes |
| PP6R3_HUMAN  | Serine/threonine-protein phosphatase 6 regulatory subunit 3 OS=Homo sapiens GN=PPP6R3 PE=1 SV=2        | 0.031435 | 2.245631 | yes |
| MAP1B_HUMAN  | Microtubule-associated protein 1B OS=Homo sapiens GN=MAP1B PE=1 SV=2                                   | 1.21E-06 | 2.241344 | yes |
| ACLY_HUMAN   | ATP-citrate synthase OS=Homo sapiens GN=ACLY PE=1 SV=3                                                 | 7.73E-06 | 2.211019 | yes |
| MAGD2_HUMAN  | Melanoma-associated antigen D2 OS=Homo sapiens GN=MAGED2 PE=1 SV=2                                     | 0.002412 | 2.210635 | yes |
| CUL2_HUMAN   | Cullin-2 OS=Homo sapiens GN=CUL2 PE=1 SV=2                                                             | 0.041311 | 2.209762 | yes |
| CCD50_HUMAN  | Coiled-coil domain-containing protein 50 OS=Homo sapiens GN=CCDC50 PE=1 SV=1                           | 0.00608  | 2.20045  | yes |
| SMC2_HUMAN   | Structural maintenance of chromosomes protein 2 OS=Homo sapiens GN=SMC2 PE=1 SV=2                      | 2.79E-05 | 2.195931 | yes |
| ARHGAP_HUMAN | Rho guanine nucleotide exchange factor 10 OS=Homo sapiens GN=ARHGEF10 PE=1 SV=4                        | 0.020388 | 2.18558  | yes |
| EMAL3_HUMAN  | Echinoderm microtubule-associated protein-like 3 OS=Homo sapiens OX=9606 GN=EML3 PE=1 SV=1             | 0.016985 | 2.183761 | yes |
| MEP50_HUMAN  | Methylosome protein 50 OS=Homo sapiens GN=WDR77 PE=1 SV=1                                              | 0.023243 | 2.183433 | yes |

|             |                                                                                           |          |          |     |
|-------------|-------------------------------------------------------------------------------------------|----------|----------|-----|
| FXR2_HUMAN  | Fragile X mental retardation syndrome-related protein 2 OS=Homo sapiens GN=FXR2 PE=1 SV=2 | 0.047327 | 2.179973 | yes |
| PFKAM_HUMAN | ATP-dependent 6-phosphofructokinase, muscle type OS=Homo sapiens GN=PFKM PE=1 SV=2        | 0.013682 | 2.177829 | yes |
| NUDC1_HUMAN | NudC domain-containing protein 1 OS=Homo sapiens GN=NUDCD1 PE=1 SV=2                      | 0.030811 | 2.162127 | yes |
| CSK_HUMAN   | Tyrosine-protein kinase CSK OS=Homo sapiens GN=CSK PE=1 SV=1                              | 0.005714 | 2.1394   | yes |
| TLDC1_HUMAN | TLD domain-containing protein 1 OS=Homo sapiens OX=9606 GN=TLDC1 PE=1 SV=2                | 0.030316 | 2.133016 | yes |
| PPR18_HUMAN | Phostensin OS=Homo sapiens GN=PPP1R18 PE=1 SV=1                                           | 0.004194 | 2.132669 | yes |
| EDC4_HUMAN  | Enhancer of mRNA-decapping protein 4 OS=Homo sapiens GN=EDC4 PE=1 SV=1                    | 0.002445 | 2.130112 | yes |
| PDC6L_HUMAN | Programmed cell death 6-interacting protein OS=Homo sapiens GN=PDCD6IP PE=1 SV=1          | 3.54E-05 | 2.124265 | yes |
| PTX3_HUMAN  | Pentraxin-related protein PTX3 OS=Homo sapiens GN=PTX3 PE=1 SV=3                          | 0.007534 | 2.121475 | yes |
| RPAC1_HUMAN | DNA-directed RNA polymerases I and III subunit RPAC1 OS=Homo sapiens GN=POLR1C PE=1 SV=1  | 0.02197  | 2.119349 | yes |
| RHG01_HUMAN | Rho GTPase-activating protein 1 OS=Homo sapiens GN=ARHGAP1 PE=1 SV=1                      | 0.000788 | 2.115747 | yes |
| PDLI1_HUMAN | PDZ and LIM domain protein 1 OS=Homo sapiens GN=PDLIM1 PE=1 SV=4                          | 0.006599 | 2.111974 | yes |

|             |                                                                                                 |          |          |     |
|-------------|-------------------------------------------------------------------------------------------------|----------|----------|-----|
| NCKP1_HUMAN | Nck-associated protein 1 OS=Homo sapiens GN=NCKAP1 PE=1 SV=1                                    | 0.00123  | 2.106568 | yes |
| DCTN2_HUMAN | Dynactin subunit 2 OS=Homo sapiens GN=DCTN2 PE=1 SV=4                                           | 0.001118 | 2.103307 | yes |
| SC24C_HUMAN | Protein transport protein Sec24C OS=Homo sapiens GN=SEC24C PE=1 SV=3                            | 0.000247 | 2.101673 | yes |
| ATF6A_HUMAN | Cyclic AMP-dependent transcription factor ATF-6 alpha OS=Homo sapiens GN=ATF6 PE=1 SV=3         | 0.028797 | 2.09185  | yes |
| TERA_HUMAN  | Transitional endoplasmic reticulum ATPase OS=Homo sapiens GN=VCP PE=1 SV=4                      | 8.38E-05 | 2.066794 | yes |
| ATX2L_HUMAN | Ataxin-2-like protein OS=Homo sapiens GN=ATXN2L PE=1 SV=2                                       | 0.000208 | 2.049184 | yes |
| FBX7_HUMAN  | F-box only protein 7 OS=Homo sapiens GN=FBXO7 PE=1 SV=1                                         | 0.008959 | 2.046057 | yes |
| STAM2_HUMAN | Signal transducing adapter molecule 2 OS=Homo sapiens GN=STAM2 PE=1 SV=1                        | 0.000838 | 2.041934 | yes |
| LASP1_HUMAN | LIM and SH3 domain protein 1 OS=Homo sapiens GN=LASP1 PE=1 SV=2                                 | 0.002236 | 2.038818 | yes |
| FLNC_HUMAN  | Filamin-C OS=Homo sapiens GN=FLNC PE=1 SV=3                                                     | 0.000147 | 2.03504  | yes |
| SRPRA_HUMAN | Signal recognition particle receptor subunit alpha OS=Homo sapiens OX=9606 GN=SRPRA PE=1 SV=2   | 0.010493 | 2.034006 | yes |
| EIF3K_HUMAN | Eukaryotic translation initiation factor 3 subunit K OS=Homo sapiens OX=9606 GN=EIF3K PE=1 SV=1 | 0.035587 | 2.032722 | yes |



|             |                                                                                          |                  |                  |     |
|-------------|------------------------------------------------------------------------------------------|------------------|------------------|-----|
| PUR4_HUMAN  | Phosphoribosylformylglycinamide synthase OS=Homo sapiens GN=PFAS PE=1 SV=4               | 0.01<br>100<br>2 | 2.02<br>820<br>3 | yes |
| MARE2_HUMAN | Microtubule-associated protein RP/EB family member 2 OS=Homo sapiens GN=MAPRE2 PE=1 SV=1 | 3.25<br>E-<br>05 | 2.02<br>805<br>9 | yes |
| DLGP5_HUMAN | Disks large-associated protein 5 OS=Homo sapiens GN=DLGAP5 PE=1 SV=2                     | 0.01<br>291<br>9 | 2.02<br>444      | yes |
| POP1_HUMAN  | Ribonucleases P/MRP protein subunit POP1 OS=Homo sapiens GN=POP1 PE=1 SV=2               | 0.03<br>864<br>6 | 2.02<br>238<br>7 | yes |
| EIF3H_HUMAN | Eukaryotic translation initiation factor 3 subunit H OS=Homo sapiens GN=EIF3H PE=1 SV=1  | 0.00<br>151<br>8 | 2.02<br>176<br>1 | yes |
| OPA1_HUMAN  | Dynamin-like 120 kDa protein, mitochondrial OS=Homo sapiens OX=9606 GN=OPA1 PE=1 SV=3    | 0.04<br>482<br>3 | 2.00<br>338<br>4 | yes |
| RAIN_HUMAN  | Ras-interacting protein 1 OS=Homo sapiens GN=RASIP1 PE=1 SV=1                            | 0.00<br>040<br>2 | 2.00<br>306<br>2 | yes |
| CNOT2_HUMAN | CCR4-NOT transcription complex subunit 2 OS=Homo sapiens GN=CNOT2 PE=1 SV=1              | 0.00<br>238<br>2 | 1.97<br>999<br>2 | yes |
| IQGA1_HUMAN | Ras GTPase-activating-like protein IQGAP1 OS=Homo sapiens GN=IQGAP1 PE=1 SV=1            | 9.49<br>E-<br>08 | 1.97<br>619<br>4 | yes |
| OXSR1_HUMAN | Serine/threonine-protein kinase OSR1 OS=Homo sapiens GN=OXSR1 PE=1 SV=1                  | 0.04<br>121      | 1.95<br>798<br>4 | yes |
| AGFG1_HUMAN | Arf-GAP domain and FG repeat-containing protein 1 OS=Homo sapiens GN=AGFG1 PE=1 SV=2     | 0.00<br>548<br>6 | 1.95<br>262      | yes |
| DNJA1_HUMAN | DnaJ homolog subfamily A member 1 OS=Homo sapiens GN=DNAJA1 PE=1 SV=2                    | 0.02<br>061<br>7 | 1.94<br>866<br>1 | yes |

|             |                                                                                                 |          |          |     |
|-------------|-------------------------------------------------------------------------------------------------|----------|----------|-----|
| CHRD1_HUMAN | Cysteine and histidine-rich domain-containing protein 1 OS=Homo sapiens GN=CHORDC1 PE=1 SV=2    | 0.041788 | 1.944351 | yes |
| LARP4_HUMAN | La-related protein 4 OS=Homo sapiens GN=LARP4 PE=1 SV=3                                         | 0.014178 | 1.942026 | yes |
| APT_HUMAN   | Adenine phosphoribosyltransferase OS=Homo sapiens GN=APRT PE=1 SV=2                             | 0.04245  | 1.940808 | yes |
| PA1B2_HUMAN | Platelet-activating factor acetylhydrolase IB subunit beta OS=Homo sapiens GN=PFAH1B2 PE=1 SV=1 | 0.016567 | 1.914665 | yes |
| NXF1_HUMAN  | Nuclear RNA export factor 1 OS=Homo sapiens GN=NXF1 PE=1 SV=1                                   | 0.005017 | 1.913687 | yes |
| LTOR1_HUMAN | Ragulator complex protein LAMTOR1 OS=Homo sapiens GN=LAMTOR1 PE=1 SV=2                          | 0.014445 | 1.895467 | yes |
| NEMF_HUMAN  | Nuclear export mediator factor NEMF OS=Homo sapiens GN=NEMF PE=1 SV=4                           | 0.030318 | 1.894812 | yes |
| CSN4_HUMAN  | COP9 signalosome complex subunit 4 OS=Homo sapiens GN=COPS4 PE=1 SV=1                           | 0.015746 | 1.885069 | yes |
| EIF3G_HUMAN | Eukaryotic translation initiation factor 3 subunit G OS=Homo sapiens GN=EIF3G PE=1 SV=2         | 0.003207 | 1.87966  | yes |
| KTN1_HUMAN  | Kinectin OS=Homo sapiens GN=KTN1 PE=1 SV=1                                                      | 0.009817 | 1.863297 | yes |
| E41L2_HUMAN | Band 4.1-like protein 2 OS=Homo sapiens GN=EPB41L2 PE=1 SV=1                                    | 0.021528 | 1.862215 | yes |
| WASF2_HUMAN | Wiskott-Aldrich syndrome protein family member 2 OS=Homo sapiens GN=WASF2 PE=1 SV=3             | 0.002262 | 1.85893  | yes |

|             |                                                                                                          |          |          |     |
|-------------|----------------------------------------------------------------------------------------------------------|----------|----------|-----|
| CADH5_HUMAN | Cadherin-5 OS=Homo sapiens GN=CDH5 PE=1 SV=5                                                             | 0.007571 | 1.85741  | yes |
| FLNA_HUMAN  | Filamin-A OS=Homo sapiens GN=FLNA PE=1 SV=4                                                              | 3.77E-09 | 1.852413 | yes |
| ANM1_HUMAN  | Protein arginine N-methyltransferase 1 OS=Homo sapiens GN=PRMT1 PE=1 SV=2                                | 0.024705 | 1.851297 | yes |
| SKP1_HUMAN  | S-phase kinase-associated protein 1 OS=Homo sapiens GN=SKP1 PE=1 SV=2                                    | 0.045255 | 1.850399 | yes |
| AIMP1_HUMAN | Aminoacyl tRNA synthase complex-interacting multifunctional protein 1 OS=Homo sapiens GN=AIMP1 PE=1 SV=2 | 0.002147 | 1.844373 | yes |
| AP3B1_HUMAN | AP-3 complex subunit beta-1 OS=Homo sapiens GN=AP3B1 PE=1 SV=3                                           | 0.000593 | 1.840351 | yes |
| LARP1_HUMAN | La-related protein 1 OS=Homo sapiens GN=LARP1 PE=1 SV=2                                                  | 0.005511 | 1.834576 | yes |
| PRC2C_HUMAN | Protein PRRC2C OS=Homo sapiens GN=PRRC2C PE=1 SV=4                                                       | 0.006791 | 1.819609 | yes |
| PLCB3_HUMAN | 1-phosphatidylinositol 4,5-bisphosphate phosphodiesterase beta-3 OS=Homo sapiens GN=PLCB3 PE=1 SV=2      | 0.001895 | 1.817945 | yes |
| EIF3E_HUMAN | Eukaryotic translation initiation factor 3 subunit E OS=Homo sapiens GN=EIF3E PE=1 SV=1                  | 0.000247 | 1.802665 | yes |
| ADDA_HUMAN  | Alpha-adducin OS=Homo sapiens GN=ADD1 PE=1 SV=2                                                          | 0.016392 | 1.784604 | yes |
| SMD1_HUMAN  | Small nuclear ribonucleoprotein Sm D1 OS=Homo sapiens GN=SNRPD1 PE=1 SV=1                                | 0.0025   | 1.784558 | yes |

|             |                                                                                        |          |          |     |
|-------------|----------------------------------------------------------------------------------------|----------|----------|-----|
| IF4G1_HUMAN | Eukaryotic translation initiation factor 4 gamma 1 OS=Homo sapiens GN=EIF4G1 PE=1 SV=4 | 0.000154 | 1.780563 | yes |
| SRC8_HUMAN  | Src substrate cortactin OS=Homo sapiens GN=CTTN PE=1 SV=2                              | 0.000386 | 1.772986 | yes |
| AK17A_HUMAN | A-kinase anchor protein 17A OS=Homo sapiens GN=AKAP17A PE=1 SV=2                       | 0.023948 | 1.77172  | yes |
| KLC1_HUMAN  | Kinesin light chain 1 OS=Homo sapiens GN=KLC1 PE=1 SV=2                                | 0.006414 | 1.769485 | yes |
| NMD3_HUMAN  | 60S ribosomal export protein NMD3 OS=Homo sapiens OX=9606 GN=NMD3 PE=1 SV=1            | 0.042483 | 1.768531 | yes |
| CLH1_HUMAN  | Clathrin heavy chain 1 OS=Homo sapiens GN=CLTC PE=1 SV=5                               | 5.84E-07 | 1.765459 | yes |
| CSRP1_HUMAN | Cysteine and glycine-rich protein 1 OS=Homo sapiens GN=CSRP1 PE=1 SV=3                 | 0.021527 | 1.765264 | yes |
| KI67_HUMAN  | Antigen KI-67 OS=Homo sapiens GN=MKI67 PE=1 SV=2                                       | 0.022941 | 1.763218 | yes |
| UGPA_HUMAN  | UTP--glucose-1-phosphate uridylyltransferase OS=Homo sapiens GN=UGP2 PE=1 SV=5         | 0.022371 | 1.762907 | yes |
| CCPG1_HUMAN | Cell cycle progression protein 1 OS=Homo sapiens GN=CCPG1 PE=1 SV=3                    | 0.043033 | 1.753888 | yes |
| AASD1_HUMAN | Alanyl-tRNA editing protein Aarsd1 OS=Homo sapiens GN=AARSD1 PE=1 SV=2                 | 0.027742 | 1.752153 | yes |
| VINC_HUMAN  | Vinculin OS=Homo sapiens GN=VCL PE=1 SV=4                                              | 0.005387 | 1.734705 | yes |

|             |                                                                                                     |                  |                  |     |
|-------------|-----------------------------------------------------------------------------------------------------|------------------|------------------|-----|
| TECR_HUMAN  | Very-long-chain enoyl-CoA reductase OS=Homo sapiens GN=TECR PE=1 SV=1                               | 0.04<br>263<br>5 | 1.72<br>962<br>6 | yes |
| PDLI5_HUMAN | PDZ and LIM domain protein 5 OS=Homo sapiens GN=PDLIM5 PE=1 SV=5                                    | 2.04<br>E-<br>05 | 1.72<br>357<br>4 | yes |
| GFPT1_HUMAN | Glutamine--fructose-6-phosphate aminotransferase [isomerizing] 1 OS=Homo sapiens GN=GFPT1 PE=1 SV=3 | 0.00<br>56       | 1.71<br>519<br>8 | yes |
| ICAL_HUMAN  | Calpastatin OS=Homo sapiens GN=CAST PE=1 SV=4                                                       | 7.05<br>E-<br>05 | 1.71<br>322<br>2 | yes |
| UBP2L_HUMAN | Ubiquitin-associated protein 2-like OS=Homo sapiens GN=UBAP2L PE=1 SV=2                             | 0.00<br>013<br>9 | 1.71<br>155<br>3 | yes |
| CORO7_HUMAN | Coronin-7 OS=Homo sapiens GN=CORO7 PE=1 SV=2                                                        | 0.01<br>325<br>5 | 1.70<br>710<br>9 | yes |
| RAB6A_HUMAN | Ras-related protein Rab-6A OS=Homo sapiens GN=RAB6A PE=1 SV=3                                       | 0.00<br>495<br>5 | 1.70<br>477<br>8 | yes |
| STRAP_HUMAN | Serine-threonine kinase receptor-associated protein OS=Homo sapiens GN=STRAP PE=1 SV=1              | 0.00<br>232<br>3 | 1.69<br>235<br>5 | yes |
| DYHC1_HUMAN | Cytoplasmic dynein 1 heavy chain 1 OS=Homo sapiens GN=DYNC1H1 PE=1 SV=5                             | 4.12<br>E-<br>07 | 1.69<br>009<br>7 | yes |
| IF4G2_HUMAN | Eukaryotic translation initiation factor 4 gamma 2 OS=Homo sapiens GN=EIF4G2 PE=1 SV=1              | 0.03<br>127<br>6 | 1.69<br>007      | yes |
| SRPRB_HUMAN | Signal recognition particle receptor subunit beta OS=Homo sapiens GN=SRPRB PE=1 SV=3                | 0.00<br>632<br>3 | 1.68<br>276<br>6 | yes |
| MYO1E_HUMAN | Unconventional myosin-Ie OS=Homo sapiens GN=MYO1E PE=1 SV=2                                         | 0.01<br>375<br>3 | 1.67<br>664<br>3 | yes |

|             |                                                                         |                  |                  |     |
|-------------|-------------------------------------------------------------------------|------------------|------------------|-----|
| PESC_HUMAN  | Pescadillo homolog OS=Homo sapiens GN=PES1 PE=1 SV=1                    | 0.04<br>012<br>9 | 1.66<br>870<br>9 | yes |
| CNN2_HUMAN  | Calponin-2 OS=Homo sapiens GN=CNN2 PE=1 SV=4                            | 0.00<br>107<br>1 | 1.66<br>688<br>9 | yes |
| CDC37_HUMAN | Hsp90 co-chaperone Cdc37 OS=Homo sapiens GN=CDC37 PE=1 SV=1             | 0.00<br>502<br>6 | 1.66<br>531<br>7 | yes |
| NU205_HUMAN | Nuclear pore complex protein Nup205 OS=Homo sapiens GN=NUP205 PE=1 SV=3 | 0.01<br>297      | 1.65<br>814<br>6 | yes |
| SRPK1_HUMAN | SRSF protein kinase 1 OS=Homo sapiens GN=SRPK1 PE=1 SV=2                | 0.00<br>200<br>3 | 1.65<br>613<br>3 | yes |
| GIMA4_HUMAN | GTPase IMAP family member 4 OS=Homo sapiens GN=GIMAP4 PE=1 SV=1         | 0.01<br>871<br>5 | 1.64<br>571<br>7 | yes |
| LDHA_HUMAN  | L-lactate dehydrogenase A chain OS=Homo sapiens GN=LDHA PE=1 SV=2       | 0.00<br>209<br>1 | 1.64<br>424<br>8 | yes |
| RAI14_HUMAN | Ankyrin OS=Homo sapiens GN=RAI14 PE=1 SV=2                              | 0.00<br>075      | 1.64<br>026<br>5 | yes |
| GLGB_HUMAN  | 1,4-alpha-glucan-branching enzyme OS=Homo sapiens GN=GBE1 PE=1 SV=3     | 0.00<br>330<br>9 | 1.64<br>018<br>8 | yes |
| DYSF_HUMAN  | Dysferlin OS=Homo sapiens GN=DYSF PE=1 SV=1                             | 0.00<br>022<br>9 | 1.63<br>886<br>5 | yes |
| LDHB_HUMAN  | L-lactate dehydrogenase B chain OS=Homo sapiens GN=LDHB PE=1 SV=2       | 0.01<br>277<br>3 | 1.63<br>483<br>2 | yes |
| MYOF_HUMAN  | Myoferlin OS=Homo sapiens GN=MYOF PE=1 SV=1                             | 5.52<br>E-<br>05 | 1.62<br>448<br>3 | yes |

|             |                                                                                                         |          |          |     |
|-------------|---------------------------------------------------------------------------------------------------------|----------|----------|-----|
| SYIC_HUMAN  | Isoleucine--tRNA ligase, cytoplasmic OS=Homo sapiens GN=IARS PE=1 SV=2                                  | 0.001825 | 1.621159 | yes |
| RALA_HUMAN  | Ras-related protein Ral-A OS=Homo sapiens GN=RALA PE=1 SV=1                                             | 0.026137 | 1.617826 | yes |
| HSP74_HUMAN | Heat shock 70 kDa protein 4 OS=Homo sapiens GN=HSPA4 PE=1 SV=4                                          | 0.013626 | 1.617624 | yes |
| SYMC_HUMAN  | Methionine--tRNA ligase, cytoplasmic OS=Homo sapiens GN=MARS PE=1 SV=2                                  | 0.000118 | 1.615564 | yes |
| C1QBP_HUMAN | Complement component 1 Q subcomponent-binding protein, mitochondrial OS=Homo sapiens GN=C1QBP PE=1 SV=1 | 0.021726 | 1.585329 | yes |
| IMA4_HUMAN  | Importin subunit alpha-4 OS=Homo sapiens GN=KPNA3 PE=1 SV=2                                             | 0.029615 | 1.579206 | yes |
| SLFN5_HUMAN | Schlafen family member 5 OS=Homo sapiens GN=SLFN5 PE=1 SV=1                                             | 0.007163 | 1.567695 | yes |
| VIGLN_HUMAN | Vigilin OS=Homo sapiens GN=HDLBP PE=1 SV=2                                                              | 5.21E-05 | 1.566509 | yes |
| ILK_HUMAN   | Integrin-linked protein kinase OS=Homo sapiens GN=ILK PE=1 SV=2                                         | 0.002023 | 1.560204 | yes |
| FXR1_HUMAN  | Fragile X mental retardation syndrome-related protein 1 OS=Homo sapiens GN=FXR1 PE=1 SV=3               | 6.70E-05 | 1.550915 | yes |
| VDAC2_HUMAN | Voltage-dependent anion-selective channel protein 2 OS=Homo sapiens GN=VDAC2 PE=1 SV=2                  | 0.011894 | 1.547292 | yes |
| NUFP2_HUMAN | Nuclear fragile X mental retardation-interacting protein 2 OS=Homo sapiens GN=NUFIP2 PE=1 SV=1          | 0.003334 | 1.545003 | yes |

|             |                                                                                            |                  |                  |     |
|-------------|--------------------------------------------------------------------------------------------|------------------|------------------|-----|
| AP3D1_HUMAN | AP-3 complex subunit delta-1 OS=Homo sapiens GN=AP3D1 PE=1 SV=1                            | 0.02<br>397      | 1.54<br>429<br>1 | yes |
| PYGB_HUMAN  | Glycogen phosphorylase, brain form OS=Homo sapiens GN=PYGB PE=1 SV=5                       | 0.00<br>225<br>3 | 1.54<br>312<br>5 | yes |
| EIF3L_HUMAN | Eukaryotic translation initiation factor 3 subunit L OS=Homo sapiens GN=EIF3L PE=1 SV=1    | 0.00<br>485<br>7 | 1.53<br>524<br>7 | yes |
| LUZP1_HUMAN | Leucine zipper protein 1 OS=Homo sapiens GN=LUZP1 PE=1 SV=2                                | 0.00<br>089<br>6 | 1.53<br>117<br>2 | yes |
| PDS5A_HUMAN | Sister chromatid cohesion protein PDS5 homolog A OS=Homo sapiens GN=PDS5A PE=1 SV=1        | 0.01<br>504<br>8 | 1.52<br>977<br>9 | yes |
| CAPR1_HUMAN | Caprin-1 OS=Homo sapiens GN=CAPRIN1 PE=1 SV=2                                              | 0.04<br>048<br>5 | 1.52<br>969<br>7 | yes |
| ECE1_HUMAN  | Endothelin-converting enzyme 1 OS=Homo sapiens GN=ECE1 PE=1 SV=2                           | 0.02<br>508<br>2 | 1.52<br>517<br>5 | yes |
| PRS10_HUMAN | 26S protease regulatory subunit 10B OS=Homo sapiens GN=PSMC6 PE=1 SV=1                     | 0.00<br>921<br>7 | 1.52<br>109<br>5 | yes |
| COPB_HUMAN  | Coatomer subunit beta OS=Homo sapiens GN=COPB1 PE=1 SV=3                                   | 1.05<br>E-<br>06 | 1.51<br>772<br>4 | yes |
| F120A_HUMAN | Constitutive coactivator of PPAR-gamma-like protein 1 OS=Homo sapiens GN=FAM120A PE=1 SV=2 | 0.00<br>526<br>2 | 1.51<br>450<br>6 | yes |
| TARA_HUMAN  | TRIO and F-actin-binding protein OS=Homo sapiens GN=TRIOBP PE=1 SV=3                       | 0.00<br>648<br>8 | 1.51<br>448<br>6 | yes |
| EIF3D_HUMAN | Eukaryotic translation initiation factor 3 subunit D OS=Homo sapiens GN=EIF3D PE=1 SV=1    | 0.00<br>112<br>5 | 1.49<br>293<br>2 | yes |



|             |                                                                                         |          |          |     |
|-------------|-----------------------------------------------------------------------------------------|----------|----------|-----|
| AP3M1_HUMAN | AP-3 complex subunit mu-1 OS=Homo sapiens GN=AP3M1 PE=1 SV=1                            | 0.021246 | 1.472438 | yes |
| VATA_HUMAN  | V-type proton ATPase catalytic subunit A OS=Homo sapiens GN=ATP6V1A PE=1 SV=2           | 0.015621 | 1.467865 | yes |
| EIF3A_HUMAN | Eukaryotic translation initiation factor 3 subunit A OS=Homo sapiens GN=EIF3A PE=1 SV=1 | 0.002596 | 1.458212 | yes |
| NUDC_HUMAN  | Nuclear migration protein nudC OS=Homo sapiens GN=NUDC PE=1 SV=1                        | 0.007772 | 1.446552 | yes |
| OTUB1_HUMAN | Ubiquitin thioesterase OTUB1 OS=Homo sapiens GN=OTUB1 PE=1 SV=2                         | 0.037021 | 1.445625 | yes |
| PURA2_HUMAN | Adenylosuccinate synthetase isozyme 2 OS=Homo sapiens GN=ADSS PE=1 SV=3                 | 0.009641 | 1.444994 | yes |
| SYEP_HUMAN  | Bifunctional glutamate/proline--tRNA ligase OS=Homo sapiens GN=EPRS PE=1 SV=5           | 0.000398 | 1.441501 | yes |
| PCBP2_HUMAN | Poly(rC)-binding protein 2 OS=Homo sapiens GN=PCBP2 PE=1 SV=1                           | 0.03785  | 1.431839 | yes |
| RUVB1_HUMAN | RuvB-like 1 OS=Homo sapiens GN=RUVBL1 PE=1 SV=1                                         | 0.009654 | 1.418398 | yes |
| RUVB2_HUMAN | RuvB-like 2 OS=Homo sapiens GN=RUVBL2 PE=1 SV=3                                         | 0.006325 | 1.416374 | yes |
| NOS3_HUMAN  | Nitric oxide synthase, endothelial OS=Homo sapiens GN=NOS3 PE=1 SV=3                    | 0.00055  | 1.416211 | yes |
| CAND1_HUMAN | Cullin-associated NEDD8-dissociated protein 1 OS=Homo sapiens GN=CAND1 PE=1 SV=2        | 0.004883 | 1.414769 | yes |

|                 |                                                                                              |                  |                  |     |
|-----------------|----------------------------------------------------------------------------------------------|------------------|------------------|-----|
| SEPT8_<br>HUMAN | Septin-8 OS=Homo sapiens GN=SEPT8 PE=1 SV=4                                                  | 0.03<br>790<br>5 | 1.41<br>116<br>1 | yes |
| SYRC_<br>HUMAN  | Arginine--tRNA ligase, cytoplasmic OS=Homo sapiens GN=RARS PE=1 SV=2                         | 0.00<br>134<br>4 | 1.39<br>553<br>7 | yes |
| PLPL6_<br>HUMAN | Neuropathy target esterase OS=Homo sapiens GN=PNPLA6 PE=1 SV=2                               | 0.02<br>971<br>5 | 1.36<br>738<br>1 | yes |
| LRRF1_<br>HUMAN | Leucine-rich repeat flightless-interacting protein 1 OS=Homo sapiens GN=LRRFIP1 PE=1 SV=2    | 0.00<br>349      | 1.36<br>509<br>3 | yes |
| RTCB_<br>HUMAN  | tRNA-splicing ligase RtcB homolog OS=Homo sapiens GN=RTCB PE=1 SV=1                          | 5.41<br>E-<br>07 | 1.34<br>778<br>1 | yes |
| PTN1_<br>HUMAN  | Tyrosine-protein phosphatase non-receptor type 1 OS=Homo sapiens GN=PTPN1 PE=1 SV=1          | 0.01<br>894<br>6 | 1.34<br>268<br>6 | yes |
| CTNA1<br>_HUMAN | Catenin alpha-1 OS=Homo sapiens GN=CTNNA1 PE=1 SV=1                                          | 0.01<br>153<br>9 | 1.33<br>868<br>4 | yes |
| HS105_<br>HUMAN | Heat shock protein 105 kDa OS=Homo sapiens GN=HSPH1 PE=1 SV=1                                | 0.02<br>570<br>6 | 1.33<br>424<br>2 | yes |
| PGAM5<br>_HUMAN | Serine/threonine-protein phosphatase PGAM5, mitochondrial OS=Homo sapiens GN=PGAM5 PE=1 SV=2 | 0.01<br>490<br>9 | 1.33<br>242<br>2 | yes |
| SAHH_<br>HUMAN  | Adenosylhomocysteinase OS=Homo sapiens GN=AHCY PE=1 SV=4                                     | 0.00<br>731<br>5 | 1.30<br>900<br>4 | yes |
| PUR2_<br>HUMAN  | Trifunctional purine biosynthetic protein adenosine-3 OS=Homo sapiens GN=GART PE=1 SV=1      | 0.01<br>468      | 1.30<br>877<br>2 | yes |
| BCAT1<br>_HUMAN | Branched-chain-amino-acid aminotransferase, cytosolic OS=Homo sapiens GN=BCAT1 PE=1 SV=3     | 0.00<br>689<br>2 | 1.26<br>837      | yes |

|                 |                                                                                          |                  |                  |     |
|-----------------|------------------------------------------------------------------------------------------|------------------|------------------|-----|
| E41L3_<br>HUMAN | Band 4.1-like protein 3 OS=Homo sapiens GN=EPB41L3 PE=1 SV=2                             | 0.02<br>788<br>3 | 1.26<br>368<br>5 | yes |
| AT1A1_<br>HUMAN | Sodium/potassium-transporting ATPase subunit alpha-1 OS=Homo sapiens GN=ATP1A1 PE=1 SV=1 | 0.03<br>017<br>8 | 1.25<br>498<br>1 | yes |
| SRRM1_<br>HUMAN | Serine/arginine repetitive matrix protein 1 OS=Homo sapiens GN=SRRM1 PE=1 SV=2           | 0.01<br>530<br>9 | 1.25<br>360<br>1 | yes |
| ARFG2_<br>HUMAN | ADP-ribosylation factor GTPase-activating protein 2 OS=Homo sapiens GN=ARFGAP2 PE=1 SV=1 | 0.04<br>826<br>9 | 1.23<br>435<br>3 | yes |
| ZN185_<br>HUMAN | Zinc finger protein 185 OS=Homo sapiens GN=ZNF185 PE=1 SV=3                              | 0.00<br>068<br>8 | 1.21<br>782<br>3 | yes |
| SYAC_<br>HUMAN  | Alanine--tRNA ligase, cytoplasmic OS=Homo sapiens GN=AARS PE=1 SV=2                      | 0.00<br>902<br>8 | 1.20<br>918      | yes |
| LMO7_<br>HUMAN  | LIM domain only protein 7 OS=Homo sapiens GN=LMO7 PE=1 SV=3                              | 0.01<br>715<br>3 | 1.19<br>342<br>8 | yes |
| UBAP2_<br>HUMAN | Ubiquitin-associated protein 2 OS=Homo sapiens GN=UBAP2 PE=1 SV=1                        | 0.03<br>356      | 1.19<br>273<br>1 | yes |
| CSK21_<br>HUMAN | Casein kinase II subunit alpha OS=Homo sapiens GN=CSNK2A1 PE=1 SV=1                      | 0.03<br>582<br>5 | 1.18<br>575<br>9 | yes |
| XPO1_<br>HUMAN  | Exportin-1 OS=Homo sapiens GN=XPO1 PE=1 SV=1                                             | 0.03<br>176<br>8 | 1.15<br>562<br>1 | yes |
| PCBP1_<br>HUMAN | Poly(rC)-binding protein 1 OS=Homo sapiens GN=PCBP1 PE=1 SV=2                            | 0.02<br>677<br>7 | 1.15<br>41       | yes |
| GSH0_<br>HUMAN  | Glutamate--cysteine ligase regulatory subunit OS=Homo sapiens GN=GCLM PE=1 SV=1          | 0.02<br>848<br>4 | 1.15<br>344<br>8 | yes |

|             |                                                                                         |          |          |     |
|-------------|-----------------------------------------------------------------------------------------|----------|----------|-----|
| PRS4_HUMAN  | 26S protease regulatory subunit 4 OS=Homo sapiens GN=PSMC1 PE=1 SV=1                    | 0.028048 | 1.152594 | yes |
| PRS6A_HUMAN | 26S protease regulatory subunit 6A OS=Homo sapiens GN=PSMC3 PE=1 SV=3                   | 0.032827 | 1.151839 | yes |
| EIF3B_HUMAN | Eukaryotic translation initiation factor 3 subunit B OS=Homo sapiens GN=EIF3B PE=1 SV=3 | 0.010249 | 1.143336 | yes |
| FLII_HUMAN  | Protein flightless-1 homolog OS=Homo sapiens GN=FLII PE=1 SV=2                          | 0.014789 | 1.11434  | yes |
| IMB1_HUMAN  | Importin subunit beta-1 OS=Homo sapiens GN=KPNB1 PE=1 SV=2                              | 0.020594 | 1.110712 | yes |
| GUAA_HUMAN  | GMP synthase [glutamine-hydrolyzing] OS=Homo sapiens GN=GMPS PE=1 SV=1                  | 0.034626 | 1.095985 | yes |
| NUP93_HUMAN | Nuclear pore complex protein Nup93 OS=Homo sapiens GN=NUP93 PE=1 SV=2                   | 0.027665 | 1.093183 | yes |
| SYDC_HUMAN  | Aspartate--tRNA ligase, cytoplasmic OS=Homo sapiens GN=DARS PE=1 SV=2                   | 0.00765  | 1.091848 | yes |
| NSF_HUMAN   | Vesicle-fusing ATPase OS=Homo sapiens GN=NSF PE=1 SV=3                                  | 0.048629 | 1.051712 | yes |
| MAP4_HUMAN  | Microtubule-associated protein 4 OS=Homo sapiens GN=MAP4 PE=1 SV=3                      | 0.001788 | 1.051539 | yes |
| VASP_HUMAN  | Vasodilator-stimulated phosphoprotein OS=Homo sapiens GN=VASP PE=1 SV=3                 | 0.031837 | 1.050609 | yes |
| TLN1_HUMAN  | Talin-1 OS=Homo sapiens GN=TLN1 PE=1 SV=3                                               | 0.001685 | 1.021246 | yes |

|             |                                                                                            |          |          |     |
|-------------|--------------------------------------------------------------------------------------------|----------|----------|-----|
| TWF1_HUMAN  | Twinfilin-1 OS=Homo sapiens GN=TWF1 PE=1 SV=3                                              | 0.005628 | 1.017387 | yes |
| AT2A2_HUMAN | Sarcoplasmic/endoplasmic reticulum calcium ATPase 2 OS=Homo sapiens GN=ATP2A2 PE=1 SV=1    | 0.000464 | 1.013873 | yes |
| SC22B_HUMAN | Vesicle-trafficking protein SEC22b OS=Homo sapiens GN=SEC22B PE=1 SV=4                     | 0.019614 | 1.007987 | yes |
| MARCS_HUMAN | Myristoylated alanine-rich C-kinase substrate OS=Homo sapiens GN=MARCKS PE=1 SV=4          | 0.017058 | 1.005444 | yes |
| RBM25_HUMAN | RNA-binding protein 25 OS=Homo sapiens GN=RBM25 PE=1 SV=3                                  | 0.049409 | 1.002578 | yes |
| TRI25_HUMAN | E3 ubiquitin/ISG15 ligase TRIM25 OS=Homo sapiens GN=TRIM25 PE=1 SV=2                       | 0.016137 | 0.983977 | yes |
| PICAL_HUMAN | Phosphatidylinositol-binding clathrin assembly protein OS=Homo sapiens GN=PICALM PE=1 SV=2 | 0.016902 | 0.971835 | yes |
| COPE_HUMAN  | Coatomer subunit epsilon OS=Homo sapiens GN=COPE PE=1 SV=3                                 | 0.041045 | 0.93122  | yes |
| COPA_HUMAN  | Coatomer subunit alpha OS=Homo sapiens GN=COPA PE=1 SV=2                                   | 0.01059  | 0.930382 | yes |
| IF4B_HUMAN  | Eukaryotic translation initiation factor 4B OS=Homo sapiens GN=EIF4B PE=1 SV=2             | 0.048899 | 0.923116 | yes |
| PABP1_HUMAN | Polyadenylate-binding protein 1 OS=Homo sapiens GN=PABPC1 PE=1 SV=2                        | 0.030938 | 0.894561 | yes |
| RAN_HUMAN   | GTP-binding nuclear protein Ran OS=Homo sapiens GN=RAN PE=1 SV=3                           | 0.023952 | 0.867749 | yes |

|             |                                                                                        |                  |                  |     |
|-------------|----------------------------------------------------------------------------------------|------------------|------------------|-----|
| CSDE1_HUMAN | Cold shock domain-containing protein E1 OS=Homo sapiens GN=CSDE1 PE=1 SV=2             | 0.04<br>414      | 0.84<br>130<br>3 | yes |
| RTN4_HUMAN  | Reticulon-4 OS=Homo sapiens GN=RTN4 PE=1 SV=2                                          | 0.04<br>833      | 0.83<br>492<br>2 | yes |
| PRS8_HUMAN  | 26S protease regulatory subunit 8 OS=Homo sapiens GN=PSMC5 PE=1 SV=1                   | 0.00<br>254<br>4 | 0.81<br>566<br>8 | yes |
| AHNK_HUMAN  | Neuroblast differentiation-associated protein AHNAK OS=Homo sapiens GN=AHNAK PE=1 SV=2 | 0.00<br>766      | 0.78<br>267<br>1 | yes |
| STOM_HUMAN  | Erythrocyte band 7 integral membrane protein OS=Homo sapiens GN=STOM PE=1 SV=3         | 0.01<br>076<br>6 | 0.77<br>303<br>3 | yes |
| PLEC_HUMAN  | Plectin OS=Homo sapiens GN=PLEC PE=1 SV=3                                              | 0.01<br>284      | 0.70<br>012<br>5 | yes |
| PRKDC_HUMAN | DNA-dependent protein kinase catalytic subunit OS=Homo sapiens GN=PRKDC PE=1 SV=3      | 0.00<br>064<br>2 | 0.69<br>267<br>4 | yes |
| CAPZB_HUMAN | F-actin-capping protein subunit beta OS=Homo sapiens GN=CAPZB PE=1 SV=4                | 0.03<br>133<br>9 | 0.58<br>049<br>3 | yes |
| TCPB_HUMAN  | T-complex protein 1 subunit beta OS=Homo sapiens GN=CCT2 PE=1 SV=4                     | 0.04<br>093<br>6 | 0.57<br>325      | yes |
| IF2P_HUMAN  | Eukaryotic translation initiation factor 5B OS=Homo sapiens GN=EIF5B PE=1 SV=4         | 0.03<br>292<br>9 | 0.44<br>902<br>9 | yes |
| ARC1B_HUMAN | Actin-related protein 2/3 complex subunit 1B OS=Homo sapiens GN=ARPC1B PE=1 SV=3       | 0.00<br>608<br>2 | -<br>0.72<br>734 | yes |
| PARP1_HUMAN | Poly [ADP-ribose] polymerase 1 OS=Homo sapiens GN=PARP1 PE=1 SV=4                      | 0.00<br>228<br>6 | -<br>0.80<br>036 | yes |

|             |                                                                                                   |          |          |     |
|-------------|---------------------------------------------------------------------------------------------------|----------|----------|-----|
| P5CS_HUMAN  | Delta-1-pyrroline-5-carboxylate synthase OS=Homo sapiens GN=ALDH18A1 PE=1 SV=2                    | 0.042596 | -0.88136 | yes |
| PCCB_HUMAN  | Propionyl-CoA carboxylase beta chain, mitochondrial OS=Homo sapiens GN=PCCB PE=1 SV=3             | 0.037535 | -0.8989  | yes |
| PTMA_HUMAN  | Prothymosin alpha OS=Homo sapiens GN=PTMA PE=1 SV=2                                               | 0.047205 | -0.97003 | yes |
| K22E_HUMAN  | Keratin, type II cytoskeletal 2 epidermal OS=Homo sapiens GN=KRT2 PE=1 SV=2                       | 0.037387 | -1.0406  | yes |
| RS25_HUMAN  | 40S ribosomal protein S25 OS=Homo sapiens GN=RPS25 PE=1 SV=1                                      | 0.01066  | -1.15697 | yes |
| THIL_HUMAN  | Acetyl-CoA acetyltransferase, mitochondrial OS=Homo sapiens GN=ACAT1 PE=1 SV=1                    | 0.023832 | -1.16999 | yes |
| RL36_HUMAN  | 60S ribosomal protein L36 OS=Homo sapiens GN=RPL36 PE=1 SV=3                                      | 0.022267 | -1.2366  | yes |
| ODPB_HUMAN  | Pyruvate dehydrogenase E1 component subunit beta, mitochondrial OS=Homo sapiens GN=PDHB PE=1 SV=3 | 0.040891 | -1.28185 | yes |
| PSIP1_HUMAN | PC4 and SFRS1-interacting protein OS=Homo sapiens GN=PSIP1 PE=1 SV=1                              | 0.036469 | -1.47606 | yes |
| RL30_HUMAN  | 60S ribosomal protein L30 OS=Homo sapiens GN=RPL30 PE=1 SV=2                                      | 0.011523 | -1.48467 | yes |
| K1C9_HUMAN  | Keratin, type I cytoskeletal 9 OS=Homo sapiens GN=KRT9 PE=1 SV=3                                  | 0.012501 | -1.51132 | yes |
| RBMX_HUMAN  | RNA-binding motif protein, X chromosome OS=Homo sapiens GN=RBMX PE=1 SV=3                         | 0.000576 | -1.55179 | yes |

|             |                                                                                                                                             |                  |                  |     |
|-------------|---------------------------------------------------------------------------------------------------------------------------------------------|------------------|------------------|-----|
| K2C6B_HUMAN | Keratin, type II cytoskeletal 6B OS=Homo sapiens GN=KRT6B PE=1 SV=5                                                                         | 0.04<br>269<br>2 | -<br>1.58<br>029 | yes |
| SF3A3_HUMAN | Splicing factor 3A subunit 3 OS=Homo sapiens GN=SF3A3 PE=1 SV=1                                                                             | 0.03<br>181      | -<br>1.63<br>523 | yes |
| NOC3L_HUMAN | Nucleolar complex protein 3 homolog OS=Homo sapiens GN=NOC3L PE=1 SV=1                                                                      | 0.03<br>954      | -<br>1.63<br>687 | yes |
| SF3A1_HUMAN | Splicing factor 3A subunit 1 OS=Homo sapiens GN=SF3A1 PE=1 SV=1                                                                             | 0.03<br>645<br>9 | -<br>1.71<br>757 | yes |
| SRSF6_HUMAN | Serine/arginine-rich splicing factor 6 OS=Homo sapiens GN=SRSF6 PE=1 SV=2                                                                   | 0.03<br>562<br>1 | -<br>1.98<br>86  | yes |
| DENR_HUMAN  | Density-regulated protein OS=Homo sapiens GN=DENR PE=1 SV=2                                                                                 | 0.04<br>755<br>1 | -<br>2.10<br>061 | yes |
| ETFB_HUMAN  | Electron transfer flavoprotein subunit beta OS=Homo sapiens GN=ETFB PE=1 SV=3                                                               | 0.04<br>413<br>1 | -<br>2.29<br>787 | yes |
| ODP2_HUMAN  | Dihydropyridyllysine-residue acetyltransferase component of pyruvate dehydrogenase complex, mitochondrial OS=Homo sapiens GN=DLAT PE=1 SV=3 | 0.00<br>804<br>1 | -<br>2.39<br>405 | yes |
| CATZ_HUMAN  | Cathepsin Z OS=Homo sapiens GN=CTSZ PE=1 SV=1                                                                                               | 0.01<br>186<br>3 | -<br>3.22<br>418 | yes |
| EXOS6_HUMAN | Exosome complex component MTR3 OS=Homo sapiens GN=EXOSC6 PE=1 SV=1                                                                          | 0.01<br>576<br>2 | -<br>3.29<br>137 | yes |
| PSMD5_HUMAN | 26S proteasome non-ATPase regulatory subunit 5 OS=Homo sapiens GN=PSMD5 PE=1 SV=3                                                           | 0.00<br>216<br>5 | 6.90<br>612<br>4 | yes |
| TAOK2_HUMAN | Serine/threonine-protein kinase TAO2 OS=Homo sapiens GN=TAOK2 PE=1 SV=2                                                                     | 0.04<br>391<br>2 | 5.84<br>478<br>5 | yes |



|             |                                                                                                  |                  |                  |     |
|-------------|--------------------------------------------------------------------------------------------------|------------------|------------------|-----|
| SH3B4_HUMAN | SH3 domain-binding protein 4 OS=Homo sapiens GN=SH3BP4 PE=1 SV=1                                 | 0.00<br>492      | 5.81<br>444<br>9 | yes |
| PSMD9_HUMAN | 26S proteasome non-ATPase regulatory subunit 9 OS=Homo sapiens OX=9606 GN=PSMD9 PE=1 SV=3        | 0.03<br>895      | 5.61<br>910<br>4 | yes |
| EP15R_HUMAN | Epidermal growth factor receptor substrate 15-like 1 OS=Homo sapiens GN=EPS15L1 PE=1 SV=1        | 0.00<br>635<br>4 | 5.54<br>983<br>1 | yes |
| TACC1_HUMAN | Transforming acidic coiled-coil-containing protein 1 OS=Homo sapiens GN=TACC1 PE=1 SV=2          | 1.31<br>E-<br>05 | 5.27<br>112      | yes |
| ITPR2_HUMAN | Inositol 1,4,5-trisphosphate receptor type 2 OS=Homo sapiens GN=ITPR2 PE=1 SV=2                  | 0.00<br>886<br>7 | 4.60<br>634<br>6 | yes |
| RIPR1_HUMAN | Rho family-interacting cell polarization regulator 1 OS=Homo sapiens OX=9606 GN=RIPOR1 PE=1 SV=1 | 0.00<br>426<br>1 | 3.57<br>493<br>2 | yes |
| SPTC1_HUMAN | Serine palmitoyltransferase 1 OS=Homo sapiens GN=SPTLC1 PE=1 SV=1                                | 0.00<br>677<br>4 | 2.46<br>651<br>6 | yes |
| SPAG5_HUMAN | Sperm-associated antigen 5 OS=Homo sapiens GN=SPAG5 PE=1 SV=2                                    | 0.03<br>537<br>2 | 2.42<br>674<br>3 | yes |
| RAB32_HUMAN | Ras-related protein Rab-32 OS=Homo sapiens GN=RAB32 PE=1 SV=3                                    | 0.01<br>921<br>2 | 2.05<br>943<br>9 | yes |
| HCLS1_HUMAN | Hematopoietic lineage cell-specific protein OS=Homo sapiens GN=HCLS1 PE=1 SV=3                   | 0.00<br>030<br>3 | 2.01<br>735<br>9 | yes |
| UBP7_HUMAN  | Ubiquitin carboxyl-terminal hydrolase 7 OS=Homo sapiens GN=USP7 PE=1 SV=2                        | 0.02<br>645<br>6 | 1.80<br>651      | yes |
| IMDH2_HUMAN | Inosine-5'-monophosphate dehydrogenase 2 OS=Homo sapiens GN=IMPDH2 PE=1 SV=2                     | 0.00<br>131<br>9 | 1.24<br>288<br>2 | yes |

|                     |                                                              |                  |                  |     |
|---------------------|--------------------------------------------------------------|------------------|------------------|-----|
| SNTB1<br>_HUM<br>AN | Beta-1-syntrophin OS=Homo sapiens OX=9606 GN=SNTB1 PE=1 SV=3 | 0.01<br>893<br>6 | -<br>3.53<br>936 | yes |
|---------------------|--------------------------------------------------------------|------------------|------------------|-----|

**Table S2. Full list of proteins identified by Rab27a-eGFP-APEX2 proximity in PMA stimulated endothelial cells**

| Acc         | Prot Name                                                                                            | p value  | fold (log <sub>2</sub> scale) | Significant |
|-------------|------------------------------------------------------------------------------------------------------|----------|-------------------------------|-------------|
| TRIPB_HUMAN | Thyroid receptor-interacting protein 11 OS=Homo sapiens GN=TRIP11 PE=1 SV=3                          | 0.042213 | 7.699202                      | Yes         |
| GOGA5_HUMAN | Golgin subfamily A member 5 OS=Homo sapiens GN=GOLGA5 PE=1 SV=3                                      | 0.004977 | 7.188816                      | Yes         |
| GCP60_HUMAN | Golgi resident protein GCP60 OS=Homo sapiens GN=ACBD3 PE=1 SV=4                                      | 0.002175 | 7.119207                      | Yes         |
| PLCG1_HUMAN | 1-phosphatidylinositol 4,5-bisphosphate phosphodiesterase gamma-1 OS=Homo sapiens GN=PLCG1 PE=1 SV=1 | 0.0399   | 7.105007                      | Yes         |
| FGD5_HUMAN  | FYVE, RhoGEF and PH domain-containing protein 5 OS=Homo sapiens GN=FGD5 PE=1 SV=3                    | 0.018864 | 7.097618                      | Yes         |
| NFKB1_HUMAN | Nuclear factor NF-kappa-B p105 subunit OS=Homo sapiens GN=NFKB1 PE=1 SV=2                            | 0.002167 | 7.070456                      | Yes         |
| CPIN1_HUMAN | Anamorsin OS=Homo sapiens GN=CIAPIN1 PE=1 SV=2                                                       | 0.008587 | 6.789231                      | Yes         |
| ARFG1_HUMAN | ADP-ribosylation factor GTPase-activating protein 1 OS=Homo sapiens GN=ARFGAP1 PE=1 SV=2             | 0.000775 | 6.693287                      | Yes         |
| INF2_HUMAN  | Inverted formin-2 OS=Homo sapiens GN=INF2 PE=1 SV=2                                                  | 0.004124 | 6.62838                       | Yes         |
| TF65_HUMAN  | Transcription factor p65 OS=Homo sapiens GN=RELA PE=1 SV=2                                           | 0.006057 | 6.590939                      | Yes         |
| RN213_HUMAN | E3 ubiquitin-protein ligase RNF213 OS=Homo sapiens GN=RNF213 PE=1 SV=3                               | 1.39E-05 | 6.532166                      | Yes         |
| DJC13_HUMAN | DnaJ homolog subfamily C member 13 OS=Homo sapiens GN=DNAJC13 PE=1 SV=5                              | 0.017245 | 6.525356                      | Yes         |
| AKP13_HUMAN | A-kinase anchor protein 13 OS=Homo sapiens GN=AKAP13 PE=1 SV=2                                       | 0.01053  | 6.405563                      | Yes         |
| MAP1A_HUMAN | Microtubule-associated protein 1A OS=Homo sapiens GN=MAP1A PE=1 SV=6                                 | 0.028358 | 6.361723                      | Yes         |

|             |                                                                                                               |              |              |     |
|-------------|---------------------------------------------------------------------------------------------------------------|--------------|--------------|-----|
| ARG28_HUMAN | Rho guanine nucleotide exchange factor 28 OS=Homo sapiens OX=9606 GN=ARHGEF28 PE=1 SV=3                       | 0.04<br>4589 | 6.34<br>5712 | Yes |
| BCAR1_HUMAN | Breast cancer anti-estrogen resistance protein 1 OS=Homo sapiens GN=BCAR1 PE=1 SV=2                           | 0.00<br>0152 | 6.32<br>6023 | Yes |
| GBF1_HUMAN  | Golgi-specific brefeldin A-resistance guanine nucleotide exchange factor 1 OS=Homo sapiens GN=GBF1 PE=1 SV=2  | 0.01<br>0341 | 6.28<br>1877 | Yes |
| JIP4_HUMAN  | C-Jun-amino-terminal kinase-interacting protein 4 OS=Homo sapiens GN=SPAG9 PE=1 SV=4                          | 1.88<br>E-05 | 6.18<br>4854 | Yes |
| KANK1_HUMAN | KN motif and ankyrin repeat domain-containing protein 1 OS=Homo sapiens OX=9606 GN=KANK1 PE=1 SV=3            | 0.02<br>9917 | 6.18<br>1895 | Yes |
| IF4G3_HUMAN | Eukaryotic translation initiation factor 4 gamma 3 OS=Homo sapiens GN=EIF4G3 PE=1 SV=2                        | 0.01<br>0647 | 6.17<br>5441 | Yes |
| SHRM2_HUMAN | Protein Shroom2 OS=Homo sapiens GN=SHROOM2 PE=1 SV=1                                                          | 0.02<br>4851 | 6.17<br>328  | Yes |
| MINK1_HUMAN | Misshapen-like kinase 1 OS=Homo sapiens GN=MINK1 PE=1 SV=2                                                    | 0.02<br>3174 | 6.14<br>8618 | Yes |
| SHRM4_HUMAN | Protein Shroom4 OS=Homo sapiens GN=SHROOM4 PE=1 SV=3                                                          | 0.01<br>1822 | 6.12<br>2135 | Yes |
| RHG31_HUMAN | Rho GTPase-activating protein 31 OS=Homo sapiens GN=ARHGAP31 PE=1 SV=2                                        | 0.00<br>907  | 6.11<br>2982 | Yes |
| ARAP3_HUMAN | Arf-GAP with Rho-GAP domain, ANK repeat and PH domain-containing protein 3 OS=Homo sapiens GN=ARAP3 PE=1 SV=1 | 0.00<br>0571 | 6.04<br>6698 | Yes |
| CLAP2_HUMAN | CLIP-associating protein 2 OS=Homo sapiens GN=CLASP2 PE=1 SV=2                                                | 0.04<br>3074 | 5.99<br>5782 | Yes |
| LRBA_HUMAN  | Lipopolysaccharide-responsive and beige-like anchor protein OS=Homo sapiens GN=LRBA PE=1 SV=4                 | 2.09<br>E-05 | 5.98<br>8993 | Yes |
| EPS15_HUMAN | Epidermal growth factor receptor substrate 15 OS=Homo sapiens GN=EPS15 PE=1 SV=2                              | 0.00<br>0251 | 5.95<br>8946 | Yes |
| PDXD1_HUMAN | Pyridoxal-dependent decarboxylase domain-containing protein 1 OS=Homo sapiens GN=PDXDC1 PE=1 SV=2             | 0.00<br>2579 | 5.94<br>2188 | Yes |
| TACC1_HUMAN | Transforming acidic coiled-coil-containing protein 1 OS=Homo sapiens GN=TACC1 PE=1 SV=2                       | 0.00<br>0315 | 5.94<br>1501 | Yes |

|                 |                                                                                                  |              |              |     |
|-----------------|--------------------------------------------------------------------------------------------------|--------------|--------------|-----|
| IFIT3_H<br>UMAN | Interferon-induced protein with tetratricopeptide repeats 3 OS=Homo sapiens GN=IFIT3 PE=1 SV=1   | 0.00<br>3843 | 5.91<br>7779 | Yes |
| UACA_H<br>UMAN  | Uveal autoantigen with coiled-coil domains and ankyrin repeats OS=Homo sapiens GN=UACA PE=1 SV=2 | 0.00<br>0197 | 5.90<br>2846 | Yes |
| RHG21_<br>HUMAN | Rho GTPase-activating protein 21 OS=Homo sapiens GN=ARHGAP21 PE=1 SV=1                           | 0.00<br>2905 | 5.86<br>9101 | Yes |
| BIG2_H<br>UMAN  | Brefeldin A-inhibited guanine nucleotide-exchange protein 2 OS=Homo sapiens GN=ARFGEF2 PE=1 SV=3 | 0.00<br>7006 | 5.86<br>2703 | Yes |
| MRCKA<br>_HUMAN | Serine/threonine-protein kinase MRCK alpha OS=Homo sapiens GN=CDC42BPA PE=1 SV=1                 | 0.03<br>9734 | 5.78<br>69   | Yes |
| HGS_HU<br>MAN   | Hepatocyte growth factor-regulated tyrosine kinase substrate OS=Homo sapiens GN=HGS PE=1 SV=1    | 4.12<br>E-05 | 5.78<br>6177 | Yes |
| DOCK4_<br>HUMAN | Dedicator of cytokinesis protein 4 OS=Homo sapiens GN=DOCK4 PE=1 SV=3                            | 0.00<br>1054 | 5.76<br>223  | Yes |
| IFIT1_H<br>UMAN | Interferon-induced protein with tetratricopeptide repeats 1 OS=Homo sapiens GN=IFIT1 PE=1 SV=2   | 0.00<br>21   | 5.75<br>4363 | Yes |
| STXB3_<br>HUMAN | Syntaxin-binding protein 3 OS=Homo sapiens GN=STXBP3 PE=1 SV=2                                   | 0.04<br>3136 | 5.69<br>1495 | Yes |
| SC24B_<br>HUMAN | Protein transport protein Sec24B OS=Homo sapiens GN=SEC24B PE=1 SV=2                             | 8.83<br>E-05 | 5.63<br>2711 | Yes |
| YTHD1_<br>HUMAN | YTH domain-containing family protein 1 OS=Homo sapiens GN=YTHDF1 PE=1 SV=1                       | 0.04<br>6343 | 5.56<br>8147 | Yes |
| HIP1R_H<br>UMAN | Huntingtin-interacting protein 1-related protein OS=Homo sapiens GN=HIP1R PE=1 SV=2              | 0.01<br>4355 | 5.54<br>4703 | Yes |
| SYTL4_<br>HUMAN | Synaptotagmin-like protein 4 OS=Homo sapiens GN=SYTL4 PE=1 SV=2                                  | 0.00<br>5196 | 5.47<br>432  | Yes |
| APC1_H<br>UMAN  | Anaphase-promoting complex subunit 1 OS=Homo sapiens GN=ANAPC1 PE=1 SV=1                         | 0.00<br>0633 | 5.39<br>333  | Yes |
| GGYF2_<br>HUMAN | GRB10-interacting GYF protein 2 OS=Homo sapiens GN=GIGYF2 PE=1 SV=1                              | 0.00<br>4084 | 5.37<br>7513 | Yes |
| VPS18_H<br>UMAN | Vacuolar protein sorting-associated protein 18 homolog OS=Homo sapiens GN=VPS18 PE=1 SV=2        | 0.03<br>8794 | 5.33<br>3829 | Yes |

|             |                                                                                                      |              |              |     |
|-------------|------------------------------------------------------------------------------------------------------|--------------|--------------|-----|
| MAST4_HUMAN | Microtubule-associated serine/threonine-protein kinase 4 OS=Homo sapiens GN=MAST4 PE=1 SV=3          | 0.00<br>2377 | 5.30<br>8096 | Yes |
| CLAP1_HUMAN | CLIP-associating protein 1 OS=Homo sapiens GN=CLASP1 PE=1 SV=1                                       | 0.01<br>7063 | 5.27<br>0758 | Yes |
| GOPC_HUMAN  | Golgi-associated PDZ and coiled-coil motif-containing protein OS=Homo sapiens GN=GOPC PE=1 SV=1      | 9.13<br>E-07 | 5.25<br>0872 | Yes |
| CNOT1_HUMAN | CCR4-NOT transcription complex subunit 1 OS=Homo sapiens GN=CNOT1 PE=1 SV=2                          | 0.00<br>0365 | 5.21<br>4304 | Yes |
| MILK1_HUMAN | MICAL-like protein 1 OS=Homo sapiens OX=9606 GN=MICALL1 PE=1 SV=2                                    | 0.00<br>5084 | 5.19<br>9561 | Yes |
| HELZ2_HUMAN | Helicase with zinc finger domain 2 OS=Homo sapiens OX=9606 GN=HELZ2 PE=1 SV=6                        | 0.03<br>5446 | 5.19<br>6935 | Yes |
| MYRIP_HUMAN | Rab effector MyRIP OS=Homo sapiens GN=MYRIP PE=1 SV=2                                                | 0.00<br>0186 | 5.16<br>2088 | Yes |
| BCR_HUMAN   | Breakpoint cluster region protein OS=Homo sapiens GN=BCR PE=1 SV=2                                   | 0.00<br>0807 | 5.16<br>0951 | Yes |
| EXOC4_HUMAN | Exocyst complex component 4 OS=Homo sapiens GN=EXOC4 PE=1 SV=1                                       | 0.00<br>955  | 5.12<br>3479 | Yes |
| NUMB_HUMAN  | Protein numb homolog OS=Homo sapiens GN=NUMB PE=1 SV=2                                               | 0.02<br>736  | 5.08<br>898  | Yes |
| PI4KA_HUMAN | Phosphatidylinositol 4-kinase alpha OS=Homo sapiens OX=9606 GN=PI4KA PE=1 SV=4                       | 0.03<br>504  | 5.04<br>944  | Yes |
| PP12C_HUMAN | Protein phosphatase 1 regulatory subunit 12C OS=Homo sapiens GN=PPP1R12C PE=1 SV=1                   | 0.01<br>0616 | 5.04<br>6155 | Yes |
| RFIP5_HUMAN | Rab11 family-interacting protein 5 OS=Homo sapiens GN=RAB11FIP5 PE=1 SV=1                            | 0.01<br>1486 | 5.02<br>2877 | Yes |
| PKHO2_HUMAN | Pleckstrin homology domain-containing family O member 2 OS=Homo sapiens OX=9606 GN=PLEKHO2 PE=1 SV=1 | 0.00<br>0695 | 5.01<br>8678 | Yes |
| EEA1_HUMAN  | Early endosome antigen 1 OS=Homo sapiens GN=EEA1 PE=1 SV=2                                           | 0.01<br>2101 | 5.01<br>7414 | Yes |
| PIEZ1_HUMAN | Piezo-type mechanosensitive ion channel component 1 OS=Homo sapiens OX=9606 GN=PIEZO1 PE=1 SV=4      | 0.01<br>1485 | 4.97<br>0915 | Yes |

|             |                                                                                                                   |              |              |     |
|-------------|-------------------------------------------------------------------------------------------------------------------|--------------|--------------|-----|
| CARD6_HUMAN | Caspase recruitment domain-containing protein 6 OS=Homo sapiens OX=9606 GN=CARD6 PE=1 SV=2                        | 0.01<br>2047 | 4.96<br>7057 | Yes |
| SNP29_HUMAN | Synaptosomal-associated protein 29 OS=Homo sapiens GN=SNAP29 PE=1 SV=1                                            | 0.00<br>7663 | 4.96<br>5716 | Yes |
| ARHG7_HUMAN | Rho guanine nucleotide exchange factor 7 OS=Homo sapiens OX=9606 GN=ARHGEF7 PE=1 SV=2                             | 0.00<br>1044 | 4.95<br>6896 | Yes |
| ZFY16_HUMAN | Zinc finger FYVE domain-containing protein 16 OS=Homo sapiens GN=ZFYVE16 PE=1 SV=3                                | 0.01<br>0497 | 4.94<br>8479 | Yes |
| SVIL_HUMAN  | Supervillin OS=Homo sapiens GN=SVIL PE=1 SV=2                                                                     | 0.00<br>1045 | 4.93<br>5908 | Yes |
| TJAP1_HUMAN | Tight junction-associated protein 1 OS=Homo sapiens GN=TJAP1 PE=1 SV=1                                            | 0.02<br>2451 | 4.92<br>4913 | Yes |
| GEPH_HUMAN  | Gephyrin OS=Homo sapiens GN=GPHN PE=1 SV=1                                                                        | 0.00<br>834  | 4.92<br>2931 | Yes |
| USP9X_HUMAN | Probable ubiquitin carboxyl-terminal hydrolase FAF-X OS=Homo sapiens GN=USP9X PE=1 SV=3                           | 3.32<br>E-08 | 4.88<br>282  | Yes |
| STRN4_HUMAN | Striatin-4 OS=Homo sapiens GN=STRN4 PE=1 SV=2                                                                     | 0.00<br>8747 | 4.88<br>16   | Yes |
| TMF1_HUMAN  | TATA element modulatory factor OS=Homo sapiens GN=TMF1 PE=1 SV=2                                                  | 0.00<br>2014 | 4.87<br>3938 | Yes |
| SNX18_HUMAN | Sorting nexin-18 OS=Homo sapiens GN=SNX18 PE=1 SV=2                                                               | 9.84<br>E-05 | 4.86<br>0684 | Yes |
| OSBP1_HUMAN | Oxysterol-binding protein 1 OS=Homo sapiens GN=OSBP PE=1 SV=1                                                     | 0.01<br>2394 | 4.85<br>3885 | Yes |
| PDE3A_HUMAN | cGMP-inhibited 3',5'-cyclic phosphodiesterase A OS=Homo sapiens GN=PDE3A PE=1 SV=3                                | 0.00<br>464  | 4.85<br>0319 | Yes |
| GOGA2_HUMAN | Golgin subfamily A member 2 OS=Homo sapiens GN=GOLGA2 PE=1 SV=3                                                   | 9.89<br>E-06 | 4.84<br>3174 | Yes |
| HERC4_HUMAN | Probable E3 ubiquitin-protein ligase HERC4 OS=Homo sapiens GN=HERC4 PE=1 SV=1                                     | 0.01<br>1799 | 4.81<br>132  | Yes |
| P3C2A_HUMAN | Phosphatidylinositol 4-phosphate 3-kinase C2 domain-containing subunit alpha OS=Homo sapiens GN=PIK3C2A PE=1 SV=2 | 0.02<br>4997 | 4.80<br>3218 | Yes |



|             |                                                                                                  |              |              |     |
|-------------|--------------------------------------------------------------------------------------------------|--------------|--------------|-----|
| NFKB2_HUMAN | Nuclear factor NF-kappa-B p100 subunit OS=Homo sapiens GN=NFKB2 PE=1 SV=4                        | 0.01<br>6132 | 4.79<br>4209 | Yes |
| SPG20_HUMAN | Spartin OS=Homo sapiens GN=SPG20 PE=1 SV=1                                                       | 0.03<br>4322 | 4.76<br>6957 | Yes |
| GOGA3_HUMAN | Golgin subfamily A member 3 OS=Homo sapiens GN=GOLGA3 PE=1 SV=2                                  | 1.03<br>E-06 | 4.75<br>7931 | Yes |
| BIG1_HUMAN  | Brefeldin A-inhibited guanine nucleotide-exchange protein 1 OS=Homo sapiens GN=ARFGEF1 PE=1 SV=2 | 2.85<br>E-05 | 4.75<br>4417 | Yes |
| PANK4_HUMAN | Pantothenate kinase 4 OS=Homo sapiens GN=PANK4 PE=1 SV=1                                         | 0.00<br>0317 | 4.75<br>3369 | Yes |
| TANC1_HUMAN | Protein TANC1 OS=Homo sapiens GN=TANC1 PE=1 SV=3                                                 | 0.04<br>8277 | 4.75<br>021  | Yes |
| XRN1_HUMAN  | 5'-3' exoribonuclease 1 OS=Homo sapiens GN=XRN1 PE=1 SV=1                                        | 0.00<br>5592 | 4.68<br>5167 | Yes |
| TOM1_HUMAN  | Target of Myb protein 1 OS=Homo sapiens GN=TOM1 PE=1 SV=2                                        | 0.00<br>1061 | 4.68<br>4542 | Yes |
| DDX58_HUMAN | Probable ATP-dependent RNA helicase DDX58 OS=Homo sapiens GN=DDX58 PE=1 SV=2                     | 0.00<br>3556 | 4.64<br>7537 | Yes |
| CAMP2_HUMAN | Calmodulin-regulated spectrin-associated protein 2 OS=Homo sapiens GN=CAMSAP2 PE=1 SV=3          | 0.01<br>891  | 4.64<br>221  | Yes |
| TPPC8_HUMAN | Trafficking protein particle complex subunit 8 OS=Homo sapiens OX=9606 GN=TRAPPC8 PE=1 SV=2      | 0.01<br>6819 | 4.63<br>8523 | Yes |
| FRMD6_HUMAN | FERM domain-containing protein 6 OS=Homo sapiens GN=FRMD6 PE=1 SV=1                              | 0.01<br>0106 | 4.62<br>4665 | Yes |
| RB27A_HUMAN | Ras-related protein Rab-27A OS=Homo sapiens GN=RAB27A PE=1 SV=3                                  | 2.54<br>E-05 | 4.61<br>5777 | Yes |
| NHSL1_HUMAN | NHS-like protein 1 OS=Homo sapiens OX=9606 GN=NHSL1 PE=1 SV=2                                    | 0.00<br>324  | 4.58<br>3226 | Yes |
| PEAK1_HUMAN | Pseudopodium-enriched atypical kinase 1 OS=Homo sapiens GN=PEAK1 PE=1 SV=4                       | 0.00<br>9589 | 4.56<br>8718 | Yes |
| EH1L1_HUMAN | EH domain-binding protein 1-like protein 1 OS=Homo sapiens OX=9606 GN=EHBP1L1 PE=1 SV=2          | 0.03<br>3483 | 4.55<br>5448 | Yes |

|             |                                                                                                        |              |              |     |
|-------------|--------------------------------------------------------------------------------------------------------|--------------|--------------|-----|
| ANKH1_HUMAN | Ankyrin repeat and KH domain-containing protein 1 OS=Homo sapiens GN=ANKHD1 PE=1 SV=1                  | 0.00<br>9895 | 4.55<br>224  | Yes |
| S12A4_HUMAN | Solute carrier family 12 member 4 OS=Homo sapiens GN=SLC12A4 PE=1 SV=2                                 | 0.00<br>8045 | 4.52<br>7032 | Yes |
| UBP8_HUMAN  | Ubiquitin carboxyl-terminal hydrolase 8 OS=Homo sapiens GN=USP8 PE=1 SV=1                              | 0.01<br>3735 | 4.51<br>0723 | Yes |
| UN13D_HUMAN | Protein unc-13 homolog D OS=Homo sapiens GN=UNC13D PE=1 SV=1                                           | 0.01<br>5857 | 4.49<br>4146 | Yes |
| PTN23_HUMAN | Tyrosine-protein phosphatase non-receptor type 23 OS=Homo sapiens GN=PTPN23 PE=1 SV=1                  | 0.00<br>0985 | 4.49<br>3375 | Yes |
| TSC2_HUMAN  | Tuberin OS=Homo sapiens OX=9606 GN=TSC2 PE=1 SV=2                                                      | 0.04<br>1224 | 4.46<br>2773 | Yes |
| VATE1_HUMAN | V-type proton ATPase subunit E 1 OS=Homo sapiens OX=9606 GN=ATP6V1E1 PE=1 SV=1                         | 0.00<br>4267 | 4.45<br>9512 | Yes |
| WNK1_HUMAN  | Serine/threonine-protein kinase WNK1 OS=Homo sapiens GN=WNK1 PE=1 SV=2                                 | 0.03<br>4911 | 4.44<br>9846 | Yes |
| ARHG1_HUMAN | Rho guanine nucleotide exchange factor 1 OS=Homo sapiens GN=ARHGEF1 PE=1 SV=2                          | 0.03<br>0036 | 4.44<br>2076 | Yes |
| MP2K3_HUMAN | Dual specificity mitogen-activated protein kinase kinase 3 OS=Homo sapiens OX=9606 GN=MAP2K3 PE=1 SV=2 | 0.04<br>1288 | 4.43<br>8343 | Yes |
| GAPD1_HUMAN | GTPase-activating protein and VPS9 domain-containing protein 1 OS=Homo sapiens GN=GAPVD1 PE=1 SV=2     | 0.00<br>5586 | 4.43<br>3154 | Yes |
| MON2_HUMAN  | Protein MON2 homolog OS=Homo sapiens GN=MON2 PE=1 SV=3                                                 | 0.02<br>2849 | 4.42<br>6602 | Yes |
| ECM29_HUMAN | Proteasome-associated protein ECM29 homolog OS=Homo sapiens GN=ECM29 PE=1 SV=2                         | 0.03<br>8751 | 4.42<br>4656 | Yes |
| EXOC7_HUMAN | Exocyst complex component 7 OS=Homo sapiens OX=9606 GN=EXOC7 PE=1 SV=3                                 | 0.00<br>9208 | 4.42<br>2759 | Yes |
| TENS1_HUMAN | Tensin-1 OS=Homo sapiens GN=TNS1 PE=1 SV=2                                                             | 0.00<br>2354 | 4.42<br>2098 | Yes |
| NU153_HUMAN | Nuclear pore complex protein Nup153 OS=Homo sapiens GN=NUP153 PE=1 SV=2                                | 0.00<br>101  | 4.41<br>6629 | Yes |

|             |                                                                                      |              |              |     |
|-------------|--------------------------------------------------------------------------------------|--------------|--------------|-----|
| NBAS_HUMAN  | Neuroblastoma-amplified sequence OS=Homo sapiens GN=NBAS PE=1 SV=2                   | 0.00<br>5064 | 4.40<br>6777 | Yes |
| CND1_HUMAN  | Condensin complex subunit 1 OS=Homo sapiens GN=NCAPD2 PE=1 SV=3                      | 0.03<br>5808 | 4.38<br>4018 | Yes |
| ZW10_HUMAN  | Centromere/kinetochore protein zw10 homolog OS=Homo sapiens GN=ZW10 PE=1 SV=3        | 0.00<br>1387 | 4.37<br>705  | Yes |
| DOC10_HUMAN | Dedicator of cytokinesis protein 10 OS=Homo sapiens GN=DOCK10 PE=1 SV=3              | 0.00<br>9737 | 4.37<br>6241 | Yes |
| BAG5_HUMAN  | BAG family molecular chaperone regulator 5 OS=Homo sapiens OX=9606 GN=BAG5 PE=1 SV=1 | 0.04<br>0186 | 4.36<br>9931 | Yes |
| KIF11_HUMAN | Kinesin-like protein KIF11 OS=Homo sapiens OX=9606 GN=KIF11 PE=1 SV=2                | 0.03<br>6694 | 4.36<br>8079 | Yes |
| LBR_HUMAN   | Lamin-B receptor OS=Homo sapiens GN=LBR PE=1 SV=2                                    | 0.00<br>3798 | 4.36<br>7564 | Yes |
| A16A1_HUMAN | Aldehyde dehydrogenase family 16 member A1 OS=Homo sapiens GN=ALDH16A1 PE=1 SV=2     | 0.00<br>2639 | 4.35<br>0077 | Yes |
| TB182_HUMAN | 182 kDa tankyrase-1-binding protein OS=Homo sapiens GN=TNKS1BP1 PE=1 SV=4            | 6.37<br>E-06 | 4.32<br>5002 | Yes |
| DOCK7_HUMAN | Dedicator of cytokinesis protein 7 OS=Homo sapiens GN=DOCK7 PE=1 SV=4                | 0.00<br>0782 | 4.31<br>2642 | Yes |
| S23IP_HUMAN | SEC23-interacting protein OS=Homo sapiens GN=SEC23IP PE=1 SV=1                       | 5.19<br>E-05 | 4.28<br>8526 | Yes |
| SAMD9_HUMAN | Sterile alpha motif domain-containing protein 9 OS=Homo sapiens GN=SAMD9 PE=1 SV=1   | 0.01<br>0699 | 4.28<br>7922 | Yes |
| AP2A2_HUMAN | AP-2 complex subunit alpha-2 OS=Homo sapiens GN=AP2A2 PE=1 SV=2                      | 0.02<br>2847 | 4.28<br>0593 | Yes |
| MYO9B_HUMAN | Unconventional myosin-IXb OS=Homo sapiens GN=MYO9B PE=1 SV=3                         | 0.00<br>035  | 4.27<br>3291 | Yes |
| GIMA8_HUMAN | GTPase IMAP family member 8 OS=Homo sapiens GN=GIMAP8 PE=2 SV=2                      | 0.00<br>2166 | 4.27<br>0488 | Yes |
| AFAD_HUMAN  | Afadin OS=Homo sapiens GN=MLLT4 PE=1 SV=3                                            | 0.00<br>8834 | 4.25<br>4048 | Yes |

|             |                                                                                                   |              |              |     |
|-------------|---------------------------------------------------------------------------------------------------|--------------|--------------|-----|
| SHLB1_HUMAN | Endophilin-B1 OS=Homo sapiens GN=SH3GLB1 PE=1 SV=1                                                | 0.04<br>6853 | 4.23<br>094  | Yes |
| F1711_HUMAN | Protein FAM171A1 OS=Homo sapiens GN=FAM171A1 PE=1 SV=1                                            | 3.70<br>E-06 | 4.20<br>1248 | Yes |
| COG6_HUMAN  | Conserved oligomeric Golgi complex subunit 6 OS=Homo sapiens OX=9606 GN=COG6 PE=1 SV=2            | 0.02<br>7049 | 4.07<br>9278 | Yes |
| RHG29_HUMAN | Rho GTPase-activating protein 29 OS=Homo sapiens GN=ARHGAP29 PE=1 SV=2                            | 4.82<br>E-06 | 4.06<br>7826 | Yes |
| LRC8A_HUMAN | Volume-regulated anion channel subunit LRRC8A OS=Homo sapiens OX=9606 GN=LRRC8A PE=1 SV=1         | 0.00<br>9849 | 4.03<br>7987 | Yes |
| DAB2_HUMAN  | Disabled homolog 2 OS=Homo sapiens GN=DAB2 PE=1 SV=3                                              | 0.04<br>9757 | 4.03<br>6907 | Yes |
| PTN12_HUMAN | Tyrosine-protein phosphatase non-receptor type 12 OS=Homo sapiens GN=PTN12 PE=1 SV=3              | 8.94<br>E-05 | 4.02<br>8365 | Yes |
| STAT2_HUMAN | Signal transducer and activator of transcription 2 OS=Homo sapiens GN=STAT2 PE=1 SV=1             | 0.00<br>1937 | 4.01<br>2841 | Yes |
| GAK_HUMAN   | Cyclin-G-associated kinase OS=Homo sapiens GN=GAK PE=1 SV=2                                       | 0.00<br>0105 | 3.99<br>9597 | Yes |
| CIP4_HUMAN  | Cdc42-interacting protein 4 OS=Homo sapiens OX=9606 GN=TRIP10 PE=1 SV=3                           | 0.01<br>5533 | 3.99<br>4291 | Yes |
| EXOC8_HUMAN | Exocyst complex component 8 OS=Homo sapiens GN=EXOC8 PE=1 SV=2                                    | 0.04<br>8626 | 3.98<br>1599 | Yes |
| GIT1_HUMAN  | ARF GTPase-activating protein GIT1 OS=Homo sapiens GN=GIT1 PE=1 SV=2                              | 0.02<br>1875 | 3.97<br>8404 | Yes |
| VPS16_HUMAN | Vacuolar protein sorting-associated protein 16 homolog OS=Homo sapiens OX=9606 GN=VPS16 PE=1 SV=2 | 0.02<br>6327 | 3.94<br>2933 | Yes |
| TBCD4_HUMAN | TBC1 domain family member 4 OS=Homo sapiens GN=TBC1D4 PE=1 SV=2                                   | 0.00<br>2522 | 3.93<br>8971 | Yes |
| OASL_HUMAN  | 2'-5'-oligoadenylate synthase-like protein OS=Homo sapiens GN=OASL PE=1 SV=2                      | 0.00<br>178  | 3.90<br>0206 | Yes |
| OPTN_HUMAN  | Optineurin OS=Homo sapiens GN=OPTN PE=1 SV=2                                                      | 0.02<br>0955 | 3.89<br>559  | Yes |

|             |                                                                                           |              |              |     |
|-------------|-------------------------------------------------------------------------------------------|--------------|--------------|-----|
| TMCC3_HUMAN | Transmembrane and coiled-coil domains protein 3 OS=Homo sapiens GN=TMCC3 PE=2 SV=3        | 0.00<br>075  | 3.89<br>4063 | Yes |
| NUP88_HUMAN | Nuclear pore complex protein Nup88 OS=Homo sapiens GN=NUP88 PE=1 SV=2                     | 0.01<br>8748 | 3.88<br>4813 | Yes |
| ACTY_HUMAN  | Beta-actin OS=Homo sapiens GN=ACTR1B PE=1 SV=1                                            | 0.01<br>9723 | 3.87<br>6715 | Yes |
| HGH1_HUMAN  | Protein HGH1 homolog OS=Homo sapiens OX=9606 GN=HGH1 PE=1 SV=1                            | 0.03<br>8666 | 3.86<br>3435 | Yes |
| AL1A2_HUMAN | Retinal dehydrogenase 2 OS=Homo sapiens GN=ALDH1A2 PE=1 SV=3                              | 0.04<br>6426 | 3.85<br>8234 | Yes |
| LPP_HUMAN   | Lipoma-preferred partner OS=Homo sapiens GN=LPP PE=1 SV=1                                 | 0.00<br>524  | 3.82<br>1677 | Yes |
| RIPK1_HUMAN | Receptor-interacting serine/threonine-protein kinase 1 OS=Homo sapiens GN=RIPK1 PE=1 SV=3 | 0.03<br>1027 | 3.81<br>97   | Yes |
| TPP2_HUMAN  | Tripeptidyl-peptidase 2 OS=Homo sapiens GN=TPP2 PE=1 SV=4                                 | 0.00<br>8925 | 3.81<br>5197 | Yes |
| PTN11_HUMAN | Tyrosine-protein phosphatase non-receptor type 11 OS=Homo sapiens GN=PTPN11 PE=1 SV=2     | 0.04<br>8971 | 3.80<br>5512 | Yes |
| UBXN4_HUMAN | UBX domain-containing protein 4 OS=Homo sapiens OX=9606 GN=UBXN4 PE=1 SV=2                | 0.00<br>3849 | 3.79<br>6337 | Yes |
| ITB4_HUMAN  | Integrin beta-4 OS=Homo sapiens GN=ITGB4 PE=1 SV=5                                        | 0.01<br>6069 | 3.79<br>3369 | Yes |
| NEMO_HUMAN  | NF-kappa-B essential modulator OS=Homo sapiens GN=IKBKG PE=1 SV=2                         | 0.01<br>5184 | 3.77<br>6309 | Yes |
| ABI1_HUMAN  | Abl interactor 1 OS=Homo sapiens GN=ABI1 PE=1 SV=4                                        | 0.00<br>2053 | 3.77<br>4226 | Yes |
| Z3H7B_HUMAN | Zinc finger CCCH domain-containing protein 7B OS=Homo sapiens GN=ZC3H7B PE=1 SV=1         | 0.00<br>262  | 3.77<br>1898 | Yes |
| SC24D_HUMAN | Protein transport protein Sec24D OS=Homo sapiens GN=SEC24D PE=1 SV=2                      | 0.00<br>0492 | 3.76<br>1313 | Yes |
| NEK9_HUMAN  | Serine/threonine-protein kinase Nek9 OS=Homo sapiens GN=NEK9 PE=1 SV=2                    | 0.00<br>5531 | 3.71<br>7464 | Yes |

|             |                                                                                                            |              |              |     |
|-------------|------------------------------------------------------------------------------------------------------------|--------------|--------------|-----|
| SHC1_HUMAN  | SHC-transforming protein 1 OS=Homo sapiens GN=SHC1 PE=1 SV=4                                               | 0.01<br>2782 | 3.70<br>2426 | Yes |
| TFG_HUMAN   | Protein TFG OS=Homo sapiens GN=TFG PE=1 SV=2                                                               | 0.01<br>2806 | 3.70<br>2289 | Yes |
| RELB_HUMAN  | Transcription factor RelB OS=Homo sapiens OX=9606 GN=RELB PE=1 SV=2                                        | 0.04<br>088  | 3.69<br>1872 | Yes |
| PAR14_HUMAN | Poly [ADP-ribose] polymerase 14 OS=Homo sapiens GN=PARP14 PE=1 SV=3                                        | 0.00<br>0595 | 3.68<br>2993 | Yes |
| WDR6_HUMAN  | WD repeat-containing protein 6 OS=Homo sapiens OX=9606 GN=WDR6 PE=1 SV=1                                   | 0.00<br>2663 | 3.68<br>1359 | Yes |
| UBE3A_HUMAN | Ubiquitin-protein ligase E3A OS=Homo sapiens OX=9606 GN=UBE3A PE=1 SV=4                                    | 0.01<br>4397 | 3.67<br>3566 | Yes |
| SYNPO_HUMAN | Synaptopodin OS=Homo sapiens GN=SYNPO PE=1 SV=2                                                            | 8.82<br>E-05 | 3.67<br>1314 | Yes |
| SC16A_HUMAN | Protein transport protein Sec16A OS=Homo sapiens GN=SEC16A PE=1 SV=3                                       | 0.00<br>0377 | 3.66<br>0751 | Yes |
| SPART_HUMAN | Spartin OS=Homo sapiens OX=9606 GN=SPART PE=1 SV=1                                                         | 0.01<br>0719 | 3.64<br>7688 | Yes |
| TGFI1_HUMAN | Transforming growth factor beta-1-induced transcript 1 protein OS=Homo sapiens OX=9606 GN=TGFBI1 PE=1 SV=2 | 0.04<br>0646 | 3.64<br>2325 | Yes |
| UB2L6_HUMAN | Ubiquitin/ISG15-conjugating enzyme E2 L6 OS=Homo sapiens OX=9606 GN=UBE2L6 PE=1 SV=4                       | 0.00<br>5947 | 3.61<br>9709 | Yes |
| GCP3_HUMAN  | Gamma-tubulin complex component 3 OS=Homo sapiens GN=TUBGCP3 PE=1 SV=2                                     | 0.00<br>259  | 3.56<br>9751 | Yes |
| DLGP5_HUMAN | Disks large-associated protein 5 OS=Homo sapiens GN=DLGAP5 PE=1 SV=2                                       | 0.00<br>1306 | 3.55<br>7816 | Yes |
| FKB15_HUMAN | FK506-binding protein 15 OS=Homo sapiens GN=FKBP15 PE=1 SV=2                                               | 9.13<br>E-05 | 3.55<br>1167 | Yes |
| ROCK2_HUMAN | Rho-associated protein kinase 2 OS=Homo sapiens GN=ROCK2 PE=1 SV=4                                         | 6.44<br>E-05 | 3.52<br>9442 | Yes |
| SCAM3_HUMAN | Secretory carrier-associated membrane protein 3 OS=Homo sapiens GN=SCAMP3 PE=1 SV=3                        | 0.00<br>959  | 3.50<br>7006 | Yes |

|             |                                                                                                    |              |              |     |
|-------------|----------------------------------------------------------------------------------------------------|--------------|--------------|-----|
| RABE2_HUMAN | Rab GTPase-binding effector protein 2 OS=Homo sapiens OX=9606 GN=RABEP2 PE=1 SV=2                  | 0.04<br>8426 | 3.50<br>3076 | Yes |
| MX1_HUMAN   | Interferon-induced GTP-binding protein Mx1 OS=Homo sapiens GN=MX1 PE=1 SV=4                        | 0.00<br>2477 | 3.49<br>5049 | Yes |
| CBL_HUMAN   | E3 ubiquitin-protein ligase CBL OS=Homo sapiens GN=CBL PE=1 SV=2                                   | 0.03<br>8431 | 3.49<br>46   | Yes |
| NU214_HUMAN | Nuclear pore complex protein Nup214 OS=Homo sapiens GN=NUP214 PE=1 SV=2                            | 0.00<br>4356 | 3.49<br>0835 | Yes |
| BRK1_HUMAN  | Protein BRICK1 OS=Homo sapiens OX=9606 GN=BRK1 PE=1 SV=1                                           | 0.04<br>8688 | 3.48<br>7384 | Yes |
| GPDM_HUMAN  | Glycerol-3-phosphate dehydrogenase, mitochondrial OS=Homo sapiens GN=GPD2 PE=1 SV=3                | 0.00<br>6924 | 3.47<br>515  | Yes |
| STX5_HUMAN  | Syntaxin-5 OS=Homo sapiens OX=9606 GN=STX5 PE=1 SV=2                                               | 0.02<br>5746 | 3.46<br>872  | Yes |
| ROCK1_HUMAN | Rho-associated protein kinase 1 OS=Homo sapiens GN=ROCK1 PE=1 SV=1                                 | 0.02<br>8264 | 3.46<br>1844 | Yes |
| AAK1_HUMAN  | AP2-associated protein kinase 1 OS=Homo sapiens GN=AAK1 PE=1 SV=3                                  | 0.00<br>0172 | 3.44<br>7426 | Yes |
| KANK3_HUMAN | KN motif and ankyrin repeat domain-containing protein 3 OS=Homo sapiens OX=9606 GN=KANK3 PE=1 SV=1 | 0.00<br>5561 | 3.44<br>185  | Yes |
| TNR6B_HUMAN | Trinucleotide repeat-containing gene 6B protein OS=Homo sapiens OX=9606 GN=TNRC6B PE=1 SV=4        | 0.00<br>1847 | 3.43<br>2759 | Yes |
| PEX14_HUMAN | Peroxisomal membrane protein PEX14 OS=Homo sapiens OX=9606 GN=PEX14 PE=1 SV=1                      | 0.02<br>1439 | 3.43<br>2214 | Yes |
| MMS19_HUMAN | MMS19 nucleotide excision repair protein homolog OS=Homo sapiens GN=MMS19 PE=1 SV=2                | 0.03<br>7553 | 3.42<br>9845 | Yes |
| RBP2_HUMAN  | E3 SUMO-protein ligase RanBP2 OS=Homo sapiens GN=RANBP2 PE=1 SV=2                                  | 0.00<br>0176 | 3.39<br>8312 | Yes |
| TIE2_HUMAN  | Angiopoietin-1 receptor OS=Homo sapiens GN=TEK PE=1 SV=2                                           | 0.04<br>7479 | 3.38<br>8778 | Yes |
| TBL2_HUMAN  | Transducin beta-like protein 2 OS=Homo sapiens GN=TBL2 PE=1 SV=1                                   | 0.02<br>0081 | 3.37<br>1185 | Yes |

|             |                                                                                           |          |          |     |
|-------------|-------------------------------------------------------------------------------------------|----------|----------|-----|
| WWTR1_HUMAN | WW domain-containing transcription regulator protein 1 OS=Homo sapiens GN=WWTR1 PE=1 SV=1 | 0.010023 | 3.358403 | Yes |
| MYPT1_HUMAN | Protein phosphatase 1 regulatory subunit 12A OS=Homo sapiens GN=PPP1R12A PE=1 SV=1        | 6.58E-05 | 3.343926 | Yes |
| CD2AP_HUMAN | CD2-associated protein OS=Homo sapiens GN=CD2AP PE=1 SV=1                                 | 6.66E-05 | 3.338696 | Yes |
| OGFR_HUMAN  | Opioid growth factor receptor OS=Homo sapiens GN=OGFR PE=1 SV=3                           | 4.28E-05 | 3.318923 | Yes |
| CTNB1_HUMAN | Catenin beta-1 OS=Homo sapiens GN=CTNNB1 PE=1 SV=1                                        | 1.47E-05 | 3.309935 | Yes |
| JAK1_HUMAN  | Tyrosine-protein kinase JAK1 OS=Homo sapiens GN=JAK1 PE=1 SV=2                            | 0.001723 | 3.308066 | Yes |
| SKIV2_HUMAN | Helicase SKI2W OS=Homo sapiens GN=SKIV2L PE=1 SV=3                                        | 0.010646 | 3.306944 | Yes |
| UBP15_HUMAN | Ubiquitin carboxyl-terminal hydrolase 15 OS=Homo sapiens GN=USP15 PE=1 SV=3               | 0.037361 | 3.303683 | Yes |
| CORO7_HUMAN | Coronin-7 OS=Homo sapiens GN=CORO7 PE=1 SV=2                                              | 0.000152 | 3.279993 | Yes |
| CKAP5_HUMAN | Cytoskeleton-associated protein 5 OS=Homo sapiens GN=CKAP5 PE=1 SV=3                      | 2.16E-05 | 3.278367 | Yes |
| RN214_HUMAN | RING finger protein 214 OS=Homo sapiens OX=9606 GN=RNF214 PE=1 SV=2                       | 0.038925 | 3.26686  | Yes |
| CNOT3_HUMAN | CCR4-NOT transcription complex subunit 3 OS=Homo sapiens GN=CNOT3 PE=1 SV=1               | 0.01605  | 3.264278 | Yes |
| ARHGF_HUMAN | Rho guanine nucleotide exchange factor 15 OS=Homo sapiens GN=ARHGEF15 PE=1 SV=4           | 0.026031 | 3.262534 | Yes |
| DC1L1_HUMAN | Cytoplasmic dynein 1 light intermediate chain 1 OS=Homo sapiens GN=DYNC1L1 PE=1 SV=3      | 0.000379 | 3.233518 | Yes |
| Z3H7A_HUMAN | Zinc finger CCCH domain-containing protein 7A OS=Homo sapiens OX=9606 GN=ZC3H7A PE=1 SV=1 | 0.026333 | 3.224339 | Yes |
| MTMR3_HUMAN | Myotubularin-related protein 3 OS=Homo sapiens GN=MTMR3 PE=1 SV=3                         | 0.031525 | 3.223137 | Yes |



|             |                                                                                                                  |              |              |     |
|-------------|------------------------------------------------------------------------------------------------------------------|--------------|--------------|-----|
| RPGF2_HUMAN | Rap guanine nucleotide exchange factor 2 OS=Homo sapiens OX=9606 GN=RAPGEF2 PE=1 SV=1                            | 0.04<br>8731 | 3.21<br>7016 | Yes |
| LRCH3_HUMAN | Leucine-rich repeat and calponin homology domain-containing protein 3 OS=Homo sapiens OX=9606 GN=LRCH3 PE=1 SV=2 | 0.02<br>4957 | 3.21<br>1543 | Yes |
| STAM1_HUMAN | Signal transducing adapter molecule 1 OS=Homo sapiens GN=STAM PE=1 SV=3                                          | 0.04<br>0921 | 3.20<br>946  | Yes |
| PSMF1_HUMAN | Proteasome inhibitor PI31 subunit OS=Homo sapiens OX=9606 GN=PSMF1 PE=1 SV=2                                     | 0.03<br>4556 | 3.20<br>5136 | Yes |
| HS74L_HUMAN | Heat shock 70 kDa protein 4L OS=Homo sapiens OX=9606 GN=HSPA4L PE=1 SV=3                                         | 0.04<br>3136 | 3.19<br>7847 | Yes |
| CT2NL_HUMAN | CTTNBP2 N-terminal-like protein OS=Homo sapiens GN=CTTNBP2NL PE=1 SV=2                                           | 0.00<br>8193 | 3.19<br>0027 | Yes |
| WDR11_HUMAN | WD repeat-containing protein 11 OS=Homo sapiens GN=WDR11 PE=1 SV=1                                               | 0.00<br>139  | 3.18<br>1941 | Yes |
| MY18A_HUMAN | Unconventional myosin-XVIIIa OS=Homo sapiens GN=MYO18A PE=1 SV=3                                                 | 0.04<br>4971 | 3.18<br>1373 | Yes |
| HECD1_HUMAN | E3 ubiquitin-protein ligase HECTD1 OS=Homo sapiens GN=HECTD1 PE=1 SV=3                                           | 0.00<br>0589 | 3.17<br>8074 | Yes |
| CLIP1_HUMAN | CAP-Gly domain-containing linker protein 1 OS=Homo sapiens GN=CLIP1 PE=1 SV=2                                    | 0.01<br>6153 | 3.17<br>6508 | Yes |
| ATRAP_HUMAN | Type-1 angiotensin II receptor-associated protein OS=Homo sapiens GN=AGTRAP PE=1 SV=1                            | 0.00<br>4624 | 3.17<br>3591 | Yes |
| TES_HUMAN   | Testin OS=Homo sapiens GN=TES PE=1 SV=1                                                                          | 0.00<br>0884 | 3.16<br>0425 | Yes |
| FRYL_HUMAN  | Protein furry homolog-like OS=Homo sapiens GN=FRYL PE=1 SV=2                                                     | 0.04<br>6768 | 3.12<br>6592 | Yes |
| TAP1_HUMAN  | Antigen peptide transporter 1 OS=Homo sapiens OX=9606 GN=TAP1 PE=1 SV=2                                          | 0.02<br>2548 | 3.12<br>5933 | Yes |
| RUFY1_HUMAN | RUN and FYVE domain-containing protein 1 OS=Homo sapiens GN=RUFY1 PE=1 SV=2                                      | 0.00<br>1019 | 3.11<br>9706 | Yes |
| KCC2D_HUMAN | Calcium/calmodulin-dependent protein kinase type II subunit delta OS=Homo sapiens GN=CAMK2D PE=1 SV=3            | 0.00<br>8124 | 3.11<br>4793 | Yes |

|             |                                                                                         |              |              |     |
|-------------|-----------------------------------------------------------------------------------------|--------------|--------------|-----|
| LAR4B_HUMAN | La-related protein 4B OS=Homo sapiens GN=LARP4B PE=1 SV=3                               | 0.01<br>039  | 3.08<br>79   | Yes |
| PRRC1_HUMAN | Protein PRRC1 OS=Homo sapiens OX=9606 GN=PRRC1 PE=1 SV=1                                | 0.00<br>8777 | 3.07<br>3726 | Yes |
| OSBL9_HUMAN | Oxysterol-binding protein-related protein 9 OS=Homo sapiens OX=9606 GN=OSBPL9 PE=1 SV=2 | 0.00<br>9262 | 3.06<br>8721 | Yes |
| SC23B_HUMAN | Protein transport protein Sec23B OS=Homo sapiens GN=SEC23B PE=1 SV=2                    | 0.00<br>6376 | 3.05<br>8278 | Yes |
| NCKP1_HUMAN | Nck-associated protein 1 OS=Homo sapiens GN=NCKAP1 PE=1 SV=1                            | 2.94<br>E-05 | 3.05<br>8034 | Yes |
| UTRO_HUMAN  | Utrophin OS=Homo sapiens GN=UTRN PE=1 SV=2                                              | 0.00<br>039  | 3.05<br>2826 | Yes |
| IST1_HUMAN  | IST1 homolog OS=Homo sapiens GN=IST1 PE=1 SV=1                                          | 0.01<br>7311 | 3.04<br>9366 | Yes |
| AKAP2_HUMAN | A-kinase anchor protein 2 OS=Homo sapiens GN=AKAP2 PE=1 SV=3                            | 0.00<br>0139 | 3.03<br>5191 | Yes |
| NFAC2_HUMAN | Nuclear factor of activated T-cells, cytoplasmic 2 OS=Homo sapiens GN=NFATC2 PE=1 SV=2  | 0.00<br>2814 | 3.03<br>0662 | Yes |
| CRCM_HUMAN  | Colorectal mutant cancer protein OS=Homo sapiens GN=MCC PE=1 SV=2                       | 0.00<br>0115 | 3.03<br>0092 | Yes |
| DNMBP_HUMAN | Dynammin-binding protein OS=Homo sapiens GN=DNMBP PE=1 SV=1                             | 8.73<br>E-05 | 3.02<br>744  | Yes |
| SYNJ2_HUMAN | Synaptojanin-2 OS=Homo sapiens GN=SYNJ2 PE=1 SV=3                                       | 0.00<br>0278 | 3.02<br>4054 | Yes |
| ZO1_HUMAN   | Tight junction protein ZO-1 OS=Homo sapiens GN=TJP1 PE=1 SV=3                           | 5.73<br>E-06 | 3.02<br>1671 | Yes |
| AVEN_HUMAN  | Cell death regulator Aven OS=Homo sapiens GN=AVEN PE=1 SV=1                             | 0.01<br>554  | 3.00<br>0215 | Yes |
| ZCCHV_HUMAN | Zinc finger CCCH-type antiviral protein 1 OS=Homo sapiens GN=ZC3HAV1 PE=1 SV=3          | 1.06<br>E-05 | 2.98<br>8099 | Yes |
| MRCKB_HUMAN | Serine/threonine-protein kinase MRCK beta OS=Homo sapiens GN=CDC42BPB PE=1 SV=2         | 0.00<br>0152 | 2.98<br>6745 | Yes |

|             |                                                                                                |              |              |     |
|-------------|------------------------------------------------------------------------------------------------|--------------|--------------|-----|
| ZYX_HUMAN   | Zyxin OS=Homo sapiens GN=ZYX PE=1 SV=1                                                         | 8.29<br>E-05 | 2.98<br>221  | Yes |
| CCDC6_HUMAN | Coiled-coil domain-containing protein 6 OS=Homo sapiens GN=CCDC6 PE=1 SV=2                     | 0.00<br>1644 | 2.95<br>8774 | Yes |
| BABA1_HUMAN | BRISC and BRCA1-A complex member 1 OS=Homo sapiens OX=9606 GN=BABAM1 PE=1 SV=1                 | 0.02<br>0293 | 2.94<br>4735 | Yes |
| PA24A_HUMAN | Cytosolic phospholipase A2 OS=Homo sapiens GN=PLA2G4A PE=1 SV=2                                | 0.03<br>1909 | 2.94<br>0151 | Yes |
| ATG9A_HUMAN | Autophagy-related protein 9A OS=Homo sapiens GN=ATG9A PE=1 SV=3                                | 0.02<br>0703 | 2.93<br>6509 | Yes |
| WDR26_HUMAN | WD repeat-containing protein 26 OS=Homo sapiens OX=9606 GN=WDR26 PE=1 SV=3                     | 0.00<br>2144 | 2.92<br>7335 | Yes |
| NFXL1_HUMAN | NF-X1-type zinc finger protein NFXL1 OS=Homo sapiens OX=9606 GN=NFXL1 PE=1 SV=2                | 0.03<br>9172 | 2.92<br>6075 | Yes |
| IFIT2_HUMAN | Interferon-induced protein with tetratricopeptide repeats 2 OS=Homo sapiens GN=IFIT2 PE=1 SV=1 | 0.00<br>4755 | 2.91<br>6769 | Yes |
| LIPB1_HUMAN | Liprin-beta-1 OS=Homo sapiens GN=PPFIBP1 PE=1 SV=2                                             | 7.42<br>E-05 | 2.90<br>5795 | Yes |
| ZO2_HUMAN   | Tight junction protein ZO-2 OS=Homo sapiens GN=TJP2 PE=1 SV=2                                  | 4.50<br>E-07 | 2.90<br>2735 | Yes |
| UHRF2_HUMAN | E3 ubiquitin-protein ligase UHRF2 OS=Homo sapiens OX=9606 GN=UHRF2 PE=1 SV=1                   | 0.02<br>8513 | 2.90<br>2095 | Yes |
| REPS1_HUMAN | RalBP1-associated Eps domain-containing protein 1 OS=Homo sapiens GN=REPS1 PE=1 SV=3           | 0.04<br>3586 | 2.90<br>0193 | Yes |
| PSME1_HUMAN | Proteasome activator complex subunit 1 OS=Homo sapiens GN=PSME1 PE=1 SV=1                      | 0.02<br>536  | 2.88<br>8191 | Yes |
| PTN14_HUMAN | Tyrosine-protein phosphatase non-receptor type 14 OS=Homo sapiens GN=PTN14 PE=1 SV=2           | 0.00<br>2831 | 2.88<br>6057 | Yes |
| RAB13_HUMAN | Ras-related protein Rab-13 OS=Homo sapiens GN=RAB13 PE=1 SV=1                                  | 0.00<br>3939 | 2.87<br>541  | Yes |
| APOL2_HUMAN | Apolipoprotein L2 OS=Homo sapiens GN=APOL2 PE=1 SV=1                                           | 0.00<br>5609 | 2.87<br>4507 | Yes |

|             |                                                                                                   |              |              |     |
|-------------|---------------------------------------------------------------------------------------------------|--------------|--------------|-----|
| DNJC7_HUMAN | DnaJ homolog subfamily C member 7 OS=Homo sapiens GN=DNAJC7 PE=1 SV=2                             | 0.02<br>6502 | 2.86<br>697  | Yes |
| PALMD_HUMAN | Palmdelphin OS=Homo sapiens GN=PALMD PE=1 SV=1                                                    | 0.00<br>6693 | 2.85<br>699  | Yes |
| TENS3_HUMAN | Tensin-3 OS=Homo sapiens OX=9606 GN=TNS3 PE=1 SV=2                                                | 0.04<br>9049 | 2.85<br>5559 | Yes |
| PTPRE_HUMAN | Receptor-type tyrosine-protein phosphatase epsilon OS=Homo sapiens GN=PTPRE PE=1 SV=1             | 0.04<br>9561 | 2.84<br>7913 | Yes |
| JUPI2_HUMAN | Jupiter microtubule associated homolog 2 OS=Homo sapiens OX=9606 GN=JPT2 PE=1 SV=1                | 0.02<br>4123 | 2.84<br>3751 | Yes |
| CLH2_HUMAN  | Clathrin heavy chain 2 OS=Homo sapiens OX=9606 GN=CLTCL1 PE=1 SV=2                                | 0.04<br>6185 | 2.84<br>361  | Yes |
| TS101_HUMAN | Tumor susceptibility gene 101 protein OS=Homo sapiens GN=TSG101 PE=1 SV=2                         | 0.01<br>9134 | 2.83<br>1776 | Yes |
| IKKB_HUMAN  | Inhibitor of nuclear factor kappa-B kinase subunit beta OS=Homo sapiens OX=9606 GN=IKKB PE=1 SV=1 | 0.01<br>5886 | 2.83<br>1007 | Yes |
| PHLB2_HUMAN | Pleckstrin homology-like domain family B member 2 OS=Homo sapiens OX=9606 GN=PHLDB2 PE=1 SV=2     | 0.01<br>8884 | 2.81<br>9642 | Yes |
| CTND1_HUMAN | Catenin delta-1 OS=Homo sapiens GN=CTNND1 PE=1 SV=1                                               | 1.63<br>E-07 | 2.80<br>1187 | Yes |
| FKBP7_HUMAN | Peptidyl-prolyl cis-trans isomerase FKBP7 OS=Homo sapiens GN=FKBP7 PE=1 SV=1                      | 0.02<br>4234 | 2.80<br>0092 | Yes |
| GTPB1_HUMAN | GTP-binding protein 1 OS=Homo sapiens OX=9606 GN=GTPBP1 PE=1 SV=3                                 | 0.00<br>9804 | 2.79<br>8539 | Yes |
| RB3GP_HUMAN | Rab3 GTPase-activating protein catalytic subunit OS=Homo sapiens GN=RAB3GAP1 PE=1 SV=3            | 0.04<br>5601 | 2.79<br>7381 | Yes |
| CSN3_HUMAN  | COP9 signalosome complex subunit 3 OS=Homo sapiens GN=COPS3 PE=1 SV=3                             | 0.00<br>075  | 2.78<br>7567 | Yes |
| ANR17_HUMAN | Ankyrin repeat domain-containing protein 17 OS=Homo sapiens GN=ANKRD17 PE=1 SV=3                  | 0.01<br>2587 | 2.78<br>6055 | Yes |
| SH2D3_HUMAN | SH2 domain-containing protein 3C OS=Homo sapiens OX=9606 GN=SH2D3C PE=1 SV=1                      | 0.01<br>3595 | 2.78<br>0887 | Yes |

|              |                                                                                     |              |              |     |
|--------------|-------------------------------------------------------------------------------------|--------------|--------------|-----|
| SMAD3_HUMAN  | Mothers against decapentaplegic homolog 3 OS=Homo sapiens GN=SMAD3 PE=1 SV=1        | 0.01<br>1615 | 2.77<br>1847 | Yes |
| IPO5_HUMAN   | Importin-5 OS=Homo sapiens GN=IPO5 PE=1 SV=4                                        | 0.03<br>7441 | 2.77<br>0264 | Yes |
| RC3H1_HUMAN  | Roquin-1 OS=Homo sapiens OX=9606 GN=RC3H1 PE=1 SV=1                                 | 0.01<br>2142 | 2.72<br>4808 | Yes |
| AFAP1_HUMAN  | Actin filament-associated protein 1 OS=Homo sapiens GN=AFAP1 PE=1 SV=2              | 0.01<br>5555 | 2.72<br>0453 | Yes |
| OGA_HUMAN    | Protein O-GlcNAcase OS=Homo sapiens GN=MGEA5 PE=1 SV=2                              | 0.00<br>9657 | 2.69<br>3999 | Yes |
| TRIP6_HUMAN  | Thyroid receptor-interacting protein 6 OS=Homo sapiens GN=TRIP6 PE=1 SV=3           | 0.01<br>0581 | 2.69<br>3702 | Yes |
| VP37B_HUMAN  | Vacuolar protein sorting-associated protein 37B OS=Homo sapiens GN=VPS37B PE=1 SV=1 | 0.03<br>7584 | 2.69<br>1929 | Yes |
| CSRP1_HUMAN  | Cysteine and glycine-rich protein 1 OS=Homo sapiens GN=CSRP1 PE=1 SV=3              | 0.00<br>0114 | 2.69<br>1348 | Yes |
| TRIO_HUMAN   | Triple functional domain protein OS=Homo sapiens GN=TRIO PE=1 SV=2                  | 0.00<br>526  | 2.65<br>35   | Yes |
| FKBP1A_HUMAN | Peptidyl-prolyl cis-trans isomerase FKBP1A OS=Homo sapiens GN=FKBP1A PE=1 SV=2      | 0.00<br>2026 | 2.64<br>9018 | Yes |
| STXB1_HUMAN  | Syntaxin-binding protein 1 OS=Homo sapiens GN=STXBP1 PE=1 SV=1                      | 0.00<br>5539 | 2.63<br>9996 | Yes |
| DDX60_HUMAN  | Probable ATP-dependent RNA helicase DDX60 OS=Homo sapiens GN=DDX60 PE=1 SV=3        | 0.03<br>9312 | 2.63<br>0719 | Yes |
| PAWR_HUMAN   | PRKC apoptosis WT1 regulator protein OS=Homo sapiens GN=PAWR PE=1 SV=1              | 0.00<br>0321 | 2.62<br>8984 | Yes |
| PAX1_HUMAN   | Paxillin OS=Homo sapiens GN=PXN PE=1 SV=3                                           | 0.00<br>0222 | 2.62<br>5654 | Yes |
| DOCK6_HUMAN  | Dedicator of cytokinesis protein 6 OS=Homo sapiens GN=DOCK6 PE=1 SV=3               | 0.00<br>2313 | 2.61<br>8236 | Yes |
| TBK1_HUMAN   | Serine/threonine-protein kinase TBK1 OS=Homo sapiens OX=9606 GN=TBK1 PE=1 SV=1      | 0.02<br>0531 | 2.59<br>5035 | Yes |

|             |                                                                                                                 |              |              |     |
|-------------|-----------------------------------------------------------------------------------------------------------------|--------------|--------------|-----|
| ERLEC_HUMAN | Endoplasmic reticulum lectin 1 OS=Homo sapiens GN=ERLEC1 PE=1 SV=1                                              | 0.03<br>402  | 2.58<br>5288 | Yes |
| AGFG1_HUMAN | Arf-GAP domain and FG repeat-containing protein 1 OS=Homo sapiens GN=AGFG1 PE=1 SV=2                            | 0.00<br>63   | 2.58<br>2707 | Yes |
| ANX11_HUMAN | Annexin A11 OS=Homo sapiens GN=ANXA11 PE=1 SV=1                                                                 | 0.00<br>0403 | 2.57<br>8404 | Yes |
| ANR28_HUMAN | Serine/threonine-protein phosphatase 6 regulatory ankyrin repeat subunit A OS=Homo sapiens GN=ANKRD28 PE=1 SV=5 | 0.04<br>0024 | 2.57<br>6263 | Yes |
| RO52_HUMAN  | E3 ubiquitin-protein ligase TRIM21 OS=Homo sapiens GN=TRIM21 PE=1 SV=1                                          | 0.03<br>6325 | 2.57<br>5594 | Yes |
| TUT7_HUMAN  | Terminal uridylyltransferase 7 OS=Homo sapiens GN=ZCCHC6 PE=1 SV=1                                              | 0.01<br>1953 | 2.57<br>4272 | Yes |
| ANFY1_HUMAN | Rabankyrin-5 OS=Homo sapiens GN=ANKFY1 PE=1 SV=2                                                                | 0.02<br>4916 | 2.56<br>5356 | Yes |
| RLGPB_HUMAN | Ral GTPase-activating protein subunit beta OS=Homo sapiens OX=9606 GN=RALGAPB PE=1 SV=1                         | 0.04<br>0958 | 2.56<br>3796 | Yes |
| TP53B_HUMAN | Tumor suppressor p53-binding protein 1 OS=Homo sapiens GN=TP53BP1 PE=1 SV=2                                     | 0.02<br>7714 | 2.55<br>9679 | Yes |
| PSMD9_HUMAN | 26S proteasome non-ATPase regulatory subunit 9 OS=Homo sapiens OX=9606 GN=PSMD9 PE=1 SV=3                       | 0.01<br>258  | 2.55<br>8241 | Yes |
| ARHG2_HUMAN | Rho guanine nucleotide exchange factor 2 OS=Homo sapiens GN=ARHGEF2 PE=1 SV=4                                   | 0.00<br>4419 | 2.53<br>9698 | Yes |
| YJ005_HUMAN | Uncharacterized protein FLJ45252 OS=Homo sapiens PE=2 SV=2                                                      | 0.00<br>0903 | 2.52<br>7237 | Yes |
| PUM1_HUMAN  | Pumilio homolog 1 OS=Homo sapiens GN=PUM1 PE=1 SV=3                                                             | 0.01<br>9997 | 2.51<br>9282 | Yes |
| ASCC3_HUMAN | Activating signal cointegrator 1 complex subunit 3 OS=Homo sapiens GN=ASCC3 PE=1 SV=3                           | 0.00<br>1969 | 2.51<br>7154 | Yes |
| TIGAR_HUMAN | Fructose-2,6-bisphosphatase TIGAR OS=Homo sapiens OX=9606 GN=TIGAR PE=1 SV=1                                    | 0.03<br>0309 | 2.51<br>6122 | Yes |
| PLXD1_HUMAN | Plexin-D1 OS=Homo sapiens GN=PLXND1 PE=1 SV=3                                                                   | 0.04<br>5308 | 2.50<br>9442 | Yes |

|                  |                                                                                                     |              |              |     |
|------------------|-----------------------------------------------------------------------------------------------------|--------------|--------------|-----|
| ABCF3_<br>HUMAN  | ATP-binding cassette sub-family F member 3 OS=Homo sapiens OX=9606<br>GN=ABCF3 PE=1 SV=2            | 0.00<br>1204 | 2.50<br>54   | Yes |
| PCAT2_<br>HUMAN  | Lysophosphatidylcholine acyltransferase 2 OS=Homo sapiens<br>GN=LPCAT2 PE=1 SV=1                    | 0.03<br>8707 | 2.50<br>3639 | Yes |
| WDR75_<br>HUMAN  | WD repeat-containing protein 75 OS=Homo sapiens GN=WDR75 PE=1<br>SV=1                               | 0.01<br>3914 | 2.50<br>1944 | Yes |
| ATF6A_<br>HUMAN  | Cyclic AMP-dependent transcription factor ATF-6 alpha OS=Homo<br>sapiens GN=ATF6 PE=1 SV=3          | 0.03<br>3674 | 2.50<br>17   | Yes |
| PTPRK_<br>HUMAN  | Receptor-type tyrosine-protein phosphatase kappa OS=Homo sapiens<br>OX=9606 GN=PTPRK PE=1 SV=2      | 0.03<br>4637 | 2.50<br>1252 | Yes |
| CRIP2_H<br>UMAN  | Cysteine-rich protein 2 OS=Homo sapiens GN=CRIP2 PE=1 SV=1                                          | 0.00<br>1127 | 2.49<br>9402 | Yes |
| CCD50_<br>HUMAN  | Coiled-coil domain-containing protein 50 OS=Homo sapiens GN=CCDC50<br>PE=1 SV=1                     | 0.03<br>3462 | 2.48<br>8486 | Yes |
| CYFIP1_<br>HUMAN | Cytoplasmic FMR1-interacting protein 1 OS=Homo sapiens GN=CYFIP1<br>PE=1 SV=1                       | 0.00<br>0375 | 2.47<br>0462 | Yes |
| MYO5A_<br>HUMAN  | Unconventional myosin-Va OS=Homo sapiens GN=MYO5A PE=1 SV=2                                         | 0.00<br>4556 | 2.44<br>58   | Yes |
| AAPK1_<br>HUMAN  | 5'-AMP-activated protein kinase catalytic subunit alpha-1 OS=Homo<br>sapiens GN=PRKAA1 PE=1 SV=4    | 0.01<br>8445 | 2.44<br>4947 | Yes |
| DP13A_<br>HUMAN  | DCC-interacting protein 13-alpha OS=Homo sapiens GN=APPL1 PE=1<br>SV=1                              | 0.04<br>4049 | 2.40<br>9599 | Yes |
| SHAN3_<br>HUMAN  | SH3 and multiple ankyrin repeat domains protein 3 OS=Homo sapiens<br>GN=SHANK3 PE=1 SV=3            | 0.02<br>347  | 2.40<br>3078 | Yes |
| STAT1_<br>HUMAN  | Signal transducer and activator of transcription 1-alpha/beta OS=Homo<br>sapiens GN=STAT1 PE=1 SV=2 | 0.00<br>5847 | 2.39<br>3214 | Yes |
| AMPD2_<br>HUMAN  | AMP deaminase 2 OS=Homo sapiens GN=AMPD2 PE=1 SV=2                                                  | 0.04<br>6441 | 2.39<br>2935 | Yes |
| WASF2_<br>HUMAN  | Wiskott-Aldrich syndrome protein family member 2 OS=Homo sapiens<br>GN=WASF2 PE=1 SV=3              | 0.00<br>382  | 2.39<br>2916 | Yes |
| TB10B_<br>HUMAN  | TBC1 domain family member 10B OS=Homo sapiens GN=TBC1D10B<br>PE=1 SV=3                              | 0.01<br>2953 | 2.38<br>5158 | Yes |

|             |                                                                                     |              |              |     |
|-------------|-------------------------------------------------------------------------------------|--------------|--------------|-----|
| MRTFB_HUMAN | Myocardin-related transcription factor B OS=Homo sapiens OX=9606 GN=MRTFB PE=1 SV=3 | 0.03<br>3528 | 2.37<br>6787 | Yes |
| USO1_HUMAN  | General vesicular transport factor p115 OS=Homo sapiens GN=USO1 PE=1 SV=2           | 9.42<br>E-05 | 2.37<br>4248 | Yes |
| SPTC2_HUMAN | Serine palmitoyltransferase 2 OS=Homo sapiens GN=SPTLC2 PE=1 SV=1                   | 0.00<br>4464 | 2.36<br>8093 | Yes |
| NEDD1_HUMAN | Protein NEDD1 OS=Homo sapiens GN=NEDD1 PE=1 SV=1                                    | 0.03<br>3413 | 2.36<br>1326 | Yes |
| UBP47_HUMAN | Ubiquitin carboxyl-terminal hydrolase 47 OS=Homo sapiens GN=USP47 PE=1 SV=3         | 0.00<br>0415 | 2.34<br>2073 | Yes |
| FERM2_HUMAN | Fermitin family homolog 2 OS=Homo sapiens GN=FERMT2 PE=1 SV=1                       | 0.00<br>0499 | 2.34<br>1045 | Yes |
| EDC4_HUMAN  | Enhancer of mRNA-decapping protein 4 OS=Homo sapiens GN=EDC4 PE=1 SV=1              | 0.00<br>2028 | 2.33<br>8826 | Yes |
| MAGD2_HUMAN | Melanoma-associated antigen D2 OS=Homo sapiens GN=MAGED2 PE=1 SV=2                  | 0.00<br>729  | 2.32<br>8079 | Yes |
| STX7_HUMAN  | Syntaxin-7 OS=Homo sapiens GN=STX7 PE=1 SV=4                                        | 0.00<br>0306 | 2.30<br>8595 | Yes |
| SQSTM_HUMAN | Sequestosome-1 OS=Homo sapiens GN=SQSTM1 PE=1 SV=1                                  | 0.00<br>0457 | 2.30<br>4319 | Yes |
| PDC6L_HUMAN | Programmed cell death 6-interacting protein OS=Homo sapiens GN=PDCD6IP PE=1 SV=1    | 0.00<br>0143 | 2.29<br>7448 | Yes |
| DIAP1_HUMAN | Protein diaphanous homolog 1 OS=Homo sapiens GN=DIAPH1 PE=1 SV=2                    | 6.44<br>E-05 | 2.29<br>6824 | Yes |
| FAK1_HUMAN  | Focal adhesion kinase 1 OS=Homo sapiens GN=PTK2 PE=1 SV=2                           | 0.00<br>4218 | 2.27<br>423  | Yes |
| HUWE1_HUMAN | E3 ubiquitin-protein ligase HUWE1 OS=Homo sapiens GN=HUWE1 PE=1 SV=3                | 0.00<br>1814 | 2.26<br>9427 | Yes |
| CE170_HUMAN | Centrosomal protein of 170 kDa OS=Homo sapiens GN=CEP170 PE=1 SV=1                  | 0.00<br>0166 | 2.26<br>8141 | Yes |
| DCTN4_HUMAN | Dynactin subunit 4 OS=Homo sapiens GN=DCTN4 PE=1 SV=1                               | 0.03<br>3336 | 2.26<br>6115 | Yes |



|             |                                                                                       |              |              |     |
|-------------|---------------------------------------------------------------------------------------|--------------|--------------|-----|
| PLIN3_HUMAN | Perilipin-3 OS=Homo sapiens GN=PLIN3 PE=1 SV=3                                        | 0.00<br>0287 | 2.26<br>2638 | Yes |
| SH3K1_HUMAN | SH3 domain-containing kinase-binding protein 1 OS=Homo sapiens GN=SH3KBP1 PE=1 SV=2   | 0.03<br>0776 | 2.22<br>1194 | Yes |
| NU188_HUMAN | Nucleoporin NUP188 homolog OS=Homo sapiens OX=9606 GN=NUP188 PE=1 SV=1                | 0.02<br>9409 | 2.21<br>8047 | Yes |
| ACSL3_HUMAN | Long-chain-fatty-acid--CoA ligase 3 OS=Homo sapiens GN=ACSL3 PE=1 SV=3                | 0.02<br>4031 | 2.21<br>6516 | Yes |
| NRBP_HUMAN  | Nuclear receptor-binding protein OS=Homo sapiens GN=NRBP1 PE=1 SV=1                   | 0.02<br>8102 | 2.19<br>922  | Yes |
| SNTB2_HUMAN | Beta-2-syntrophin OS=Homo sapiens GN=SNTB2 PE=1 SV=1                                  | 0.00<br>0174 | 2.19<br>1902 | Yes |
| FND3B_HUMAN | Fibronectin type III domain-containing protein 3B OS=Homo sapiens GN=FNDC3B PE=1 SV=2 | 0.00<br>8873 | 2.18<br>806  | Yes |
| ATIF1_HUMAN | ATPase inhibitor, mitochondrial OS=Homo sapiens OX=9606 GN=ATP5IF1 PE=1 SV=1          | 0.03<br>2343 | 2.17<br>6447 | Yes |
| VATD_HUMAN  | V-type proton ATPase subunit D OS=Homo sapiens OX=9606 GN=ATP6V1D PE=1 SV=1           | 0.03<br>4577 | 2.17<br>5315 | Yes |
| NUP62_HUMAN | Nuclear pore glycoprotein p62 OS=Homo sapiens GN=NUP62 PE=1 SV=3                      | 0.03<br>1814 | 2.15<br>9133 | Yes |
| SDCB1_HUMAN | Syntenin-1 OS=Homo sapiens OX=9606 GN=SDCBP PE=1 SV=1                                 | 0.03<br>0212 | 2.15<br>7452 | Yes |
| LMO7_HUMAN  | LIM domain only protein 7 OS=Homo sapiens GN=LMO7 PE=1 SV=3                           | 0.00<br>4011 | 2.15<br>5787 | Yes |
| SYLC_HUMAN  | Leucine--tRNA ligase, cytoplasmic OS=Homo sapiens GN=LARS PE=1 SV=2                   | 6.02<br>E-06 | 2.15<br>5735 | Yes |
| DPYL3_HUMAN | Dihydropyrimidinase-related protein 3 OS=Homo sapiens GN=DPYSL3 PE=1 SV=1             | 7.22<br>E-05 | 2.14<br>8567 | Yes |
| ITPR3_HUMAN | Inositol 1,4,5-trisphosphate receptor type 3 OS=Homo sapiens GN=ITPR3 PE=1 SV=2       | 3.47<br>E-07 | 2.14<br>3728 | Yes |
| ANXA7_HUMAN | Annexin A7 OS=Homo sapiens GN=ANXA7 PE=1 SV=3                                         | 0.00<br>6425 | 2.13<br>5762 | Yes |

|                 |                                                                                                           |              |              |     |
|-----------------|-----------------------------------------------------------------------------------------------------------|--------------|--------------|-----|
| TAOK2_<br>HUMAN | Serine/threonine-protein kinase TAO2 OS=Homo sapiens GN=TAOK2<br>PE=1 SV=2                                | 0.03<br>1194 | 2.12<br>244  | Yes |
| MAP1B_<br>HUMAN | Microtubule-associated protein 1B OS=Homo sapiens GN=MAP1B PE=1<br>SV=2                                   | 1.45<br>E-05 | 2.12<br>1094 | Yes |
| LASP1_<br>HUMAN | LIM and SH3 domain protein 1 OS=Homo sapiens GN=LASP1 PE=1<br>SV=2                                        | 0.00<br>4395 | 2.11<br>3874 | Yes |
| STAT3_<br>HUMAN | Signal transducer and activator of transcription 3 OS=Homo sapiens<br>GN=STAT3 PE=1 SV=2                  | 0.01<br>9885 | 2.11<br>2761 | Yes |
| RIR1_H<br>UMAN  | Ribonucleoside-diphosphate reductase large subunit OS=Homo sapiens<br>GN=RRM1 PE=1 SV=1                   | 0.00<br>0626 | 2.10<br>9324 | Yes |
| SCFD1_<br>HUMAN | Sec1 family domain-containing protein 1 OS=Homo sapiens GN=SCFD1<br>PE=1 SV=4                             | 0.02<br>4579 | 2.09<br>6875 | Yes |
| OSBL3_<br>HUMAN | Oxysterol-binding protein-related protein 3 OS=Homo sapiens<br>GN=OSBPL3 PE=1 SV=1                        | 0.00<br>0105 | 2.09<br>3601 | Yes |
| SC23A_<br>HUMAN | Protein transport protein Sec23A OS=Homo sapiens GN=SEC23A PE=1<br>SV=2                                   | 0.00<br>0147 | 2.08<br>6959 | Yes |
| SC24C_<br>HUMAN | Protein transport protein Sec24C OS=Homo sapiens GN=SEC24C PE=1<br>SV=3                                   | 0.00<br>0139 | 2.08<br>1192 | Yes |
| CLCB_H<br>UMAN  | Clathrin light chain B OS=Homo sapiens GN=CLTB PE=1 SV=1                                                  | 0.00<br>0909 | 2.07<br>5562 | Yes |
| AKA12_<br>HUMAN | A-kinase anchor protein 12 OS=Homo sapiens GN=AKAP12 PE=1 SV=4                                            | 0.00<br>0156 | 2.06<br>4787 | Yes |
| PACN2_<br>HUMAN | Protein kinase C and casein kinase substrate in neurons protein 2<br>OS=Homo sapiens GN=PACSIN2 PE=1 SV=2 | 0.02<br>71   | 2.06<br>0978 | Yes |
| ADAM9_<br>HUMAN | Disintegrin and metalloproteinase domain-containing protein 9 OS=Homo<br>sapiens GN=ADAM9 PE=1 SV=1       | 0.01<br>841  | 2.05<br>9425 | Yes |
| SAMH1_<br>HUMAN | Deoxynucleoside triphosphate triphosphohydrolase SAMHD1 OS=Homo<br>sapiens GN=SAMHD1 PE=1 SV=2            | 0.01<br>0186 | 2.04<br>5458 | Yes |
| NAGK_<br>HUMAN  | N-acetyl-D-glucosamine kinase OS=Homo sapiens GN=NAGK PE=1<br>SV=4                                        | 0.01<br>0317 | 2.04<br>0612 | Yes |
| DPYL2_<br>HUMAN | Dihydropyrimidinase-related protein 2 OS=Homo sapiens GN=DPYSL2<br>PE=1 SV=1                              | 0.00<br>8551 | 2.02<br>893  | Yes |

|                 |                                                                                           |              |              |     |
|-----------------|-------------------------------------------------------------------------------------------|--------------|--------------|-----|
| SMC2_H<br>UMAN  | Structural maintenance of chromosomes protein 2 OS=Homo sapiens<br>GN=SMC2 PE=1 SV=2      | 0.00<br>2456 | 2.02<br>8679 | Yes |
| IF4G2_H<br>UMAN | Eukaryotic translation initiation factor 4 gamma 2 OS=Homo sapiens<br>GN=EIF4G2 PE=1 SV=1 | 0.00<br>2606 | 2.02<br>8282 | Yes |
| BAG6_H<br>UMAN  | Large proline-rich protein BAG6 OS=Homo sapiens GN=BAG6 PE=1<br>SV=2                      | 0.04<br>2022 | 2.02<br>3475 | Yes |
| STAM2_<br>HUMAN | Signal transducing adapter molecule 2 OS=Homo sapiens GN=STAM2<br>PE=1 SV=1               | 0.02<br>9386 | 1.99<br>305  | Yes |
| PDLI4_H<br>UMAN | PDZ and LIM domain protein 4 OS=Homo sapiens GN=PDLIM4 PE=1<br>SV=2                       | 0.02<br>2288 | 1.99<br>0876 | Yes |
| CADH5_<br>HUMAN | Cadherin-5 OS=Homo sapiens GN=CDH5 PE=1 SV=5                                              | 0.00<br>8797 | 1.99<br>0516 | Yes |
| GCN1_H<br>UMAN  | eIF-2-alpha kinase activator GCN1 OS=Homo sapiens OX=9606<br>GN=GCN1 PE=1 SV=6            | 0.01<br>0193 | 1.98<br>9524 | Yes |
| PFD6_H<br>UMAN  | Prefoldin subunit 6 OS=Homo sapiens OX=9606 GN=PFDN6 PE=1 SV=1                            | 0.03<br>7181 | 1.97<br>7457 | Yes |
| PUR6_H<br>UMAN  | Multifunctional protein ADE2 OS=Homo sapiens GN=PAICS PE=1 SV=3                           | 0.01<br>0302 | 1.94<br>3441 | Yes |
| SNAA_H<br>UMAN  | Alpha-soluble NSF attachment protein OS=Homo sapiens GN=NAPA<br>PE=1 SV=3                 | 0.03<br>3843 | 1.94<br>1916 | Yes |
| CSN4_H<br>UMAN  | COP9 signalosome complex subunit 4 OS=Homo sapiens GN=COPS4<br>PE=1 SV=1                  | 0.01<br>3904 | 1.92<br>7077 | Yes |
| PLPL6_H<br>UMAN | Neuropathy target esterase OS=Homo sapiens GN=PNPLA6 PE=1 SV=2                            | 0.04<br>3083 | 1.92<br>4124 | Yes |
| PDLI1_H<br>UMAN | PDZ and LIM domain protein 1 OS=Homo sapiens GN=PDLIM1 PE=1<br>SV=4                       | 0.00<br>9411 | 1.92<br>2992 | Yes |
| SC31A_<br>HUMAN | Protein transport protein Sec31A OS=Homo sapiens GN=SEC31A PE=1<br>SV=3                   | 0.00<br>1011 | 1.91<br>6708 | Yes |
| PUR4_H<br>UMAN  | Phosphoribosylformylglycinamide synthase OS=Homo sapiens<br>GN=PFAS PE=1 SV=4             | 0.00<br>5371 | 1.90<br>6092 | Yes |
| ADDA_<br>HUMAN  | Alpha-adducin OS=Homo sapiens GN=ADD1 PE=1 SV=2                                           | 0.00<br>262  | 1.89<br>7717 | Yes |

|             |                                                                                                |              |              |     |
|-------------|------------------------------------------------------------------------------------------------|--------------|--------------|-----|
| MACF1_HUMAN | Microtubule-actin cross-linking factor 1, isoforms 1/2/3/5 OS=Homo sapiens GN=MACF1 PE=1 SV=4  | 8.13<br>E-05 | 1.89<br>53   | Yes |
| PURA_HUMAN  | Transcriptional activator protein Pur-alpha OS=Homo sapiens GN=PURA PE=1 SV=2                  | 0.02<br>9248 | 1.89<br>1173 | Yes |
| BICD2_HUMAN | Protein bicaudal D homolog 2 OS=Homo sapiens OX=9606 GN=BICD2 PE=1 SV=1                        | 0.03<br>5038 | 1.88<br>0406 | Yes |
| PYR1_HUMAN  | CAD protein OS=Homo sapiens GN=CAD PE=1 SV=3                                                   | 0.00<br>0486 | 1.87<br>518  | Yes |
| SMC4_HUMAN  | Structural maintenance of chromosomes protein 4 OS=Homo sapiens GN=SMC4 PE=1 SV=2              | 0.01<br>8679 | 1.86<br>3107 | Yes |
| UBR4_HUMAN  | E3 ubiquitin-protein ligase UBR4 OS=Homo sapiens GN=UBR4 PE=1 SV=1                             | 0.00<br>1484 | 1.82<br>8102 | Yes |
| UBP10_HUMAN | Ubiquitin carboxyl-terminal hydrolase 10 OS=Homo sapiens GN=USP10 PE=1 SV=2                    | 0.00<br>1682 | 1.81<br>5777 | Yes |
| RAIN_HUMAN  | Ras-interacting protein 1 OS=Homo sapiens GN=RASIP1 PE=1 SV=1                                  | 0.00<br>1381 | 1.81<br>1896 | Yes |
| KINH_HUMAN  | Kinesin-1 heavy chain OS=Homo sapiens GN=KIF5B PE=1 SV=1                                       | 1.15<br>E-05 | 1.80<br>0829 | Yes |
| GUAA_HUMAN  | GMP synthase [glutamine-hydrolyzing] OS=Homo sapiens GN=GMPS PE=1 SV=1                         | 0.00<br>0422 | 1.79<br>2062 | Yes |
| TARA_HUMAN  | TRIO and F-actin-binding protein OS=Homo sapiens GN=TRIOBP PE=1 SV=3                           | 0.01<br>1905 | 1.77<br>5144 | Yes |
| PPR18_HUMAN | Phostensin OS=Homo sapiens GN=PPP1R18 PE=1 SV=1                                                | 0.00<br>5237 | 1.76<br>6624 | Yes |
| IF4G1_HUMAN | Eukaryotic translation initiation factor 4 gamma 1 OS=Homo sapiens GN=EIF4G1 PE=1 SV=4         | 0.00<br>017  | 1.76<br>4813 | Yes |
| PUR2_HUMAN  | Trifunctional purine biosynthetic protein adenosine-3 OS=Homo sapiens GN=GART PE=1 SV=1        | 0.00<br>044  | 1.75<br>4509 | Yes |
| BIRC6_HUMAN | Baculoviral IAP repeat-containing protein 6 OS=Homo sapiens GN=BIRC6 PE=1 SV=2                 | 0.04<br>8212 | 1.74<br>5702 | Yes |
| NUFP2_HUMAN | Nuclear fragile X mental retardation-interacting protein 2 OS=Homo sapiens GN=NUFIP2 PE=1 SV=1 | 0.00<br>2409 | 1.74<br>0333 | Yes |

|             |                                                                                                       |              |              |     |
|-------------|-------------------------------------------------------------------------------------------------------|--------------|--------------|-----|
| NIBL1_HUMAN | Niban-like protein 1 OS=Homo sapiens GN=FAM129B PE=1 SV=3                                             | 0.02<br>9152 | 1.72<br>6038 | Yes |
| E2AK2_HUMAN | Interferon-induced, double-stranded RNA-activated protein kinase OS=Homo sapiens GN=EIF2AK2 PE=1 SV=2 | 0.00<br>725  | 1.72<br>4661 | Yes |
| PRC2C_HUMAN | Protein PRRC2C OS=Homo sapiens GN=PRRC2C PE=1 SV=4                                                    | 0.00<br>8545 | 1.72<br>3568 | Yes |
| ESYT1_HUMAN | Extended synaptotagmin-1 OS=Homo sapiens GN=ESYT1 PE=1 SV=1                                           | 0.00<br>1124 | 1.70<br>2999 | Yes |
| DCTN2_HUMAN | Dynactin subunit 2 OS=Homo sapiens GN=DCTN2 PE=1 SV=4                                                 | 0.00<br>1424 | 1.69<br>2973 | Yes |
| FAS_HUMAN   | Fatty acid synthase OS=Homo sapiens GN=FASN PE=1 SV=3                                                 | 3.16<br>E-06 | 1.69<br>1089 | Yes |
| RPB2_HUMAN  | DNA-directed RNA polymerase II subunit RPB2 OS=Homo sapiens GN=POLR2B PE=1 SV=1                       | 0.01<br>4134 | 1.69<br>0781 | Yes |
| BAG3_HUMAN  | BAG family molecular chaperone regulator 3 OS=Homo sapiens GN=BAG3 PE=1 SV=3                          | 0.04<br>1321 | 1.68<br>2548 | Yes |
| FLNB_HUMAN  | Filamin-B OS=Homo sapiens GN=FLNB PE=1 SV=2                                                           | 0.00<br>03   | 1.68<br>2275 | Yes |
| HCLS1_HUMAN | Hematopoietic lineage cell-specific protein OS=Homo sapiens GN=HCLS1 PE=1 SV=3                        | 0.00<br>0243 | 1.66<br>4939 | Yes |
| PARVA_HUMAN | Alpha-parvin OS=Homo sapiens GN=PARVA PE=1 SV=1                                                       | 0.03<br>8503 | 1.65<br>9496 | Yes |
| AIP_HUMAN   | AH receptor-interacting protein OS=Homo sapiens OX=9606 GN=AIP PE=1 SV=2                              | 0.02<br>3726 | 1.64<br>3706 | Yes |
| ACLY_HUMAN  | ATP-citrate synthase OS=Homo sapiens GN=ACLY PE=1 SV=3                                                | 4.22<br>E-05 | 1.63<br>7672 | Yes |
| PR40A_HUMAN | Pre-mRNA-processing factor 40 homolog A OS=Homo sapiens GN=PRPF40A PE=1 SV=2                          | 0.04<br>5604 | 1.63<br>5373 | Yes |
| TRI22_HUMAN | E3 ubiquitin-protein ligase TRIM22 OS=Homo sapiens GN=TRIM22 PE=1 SV=1                                | 0.04<br>1064 | 1.62<br>5695 | Yes |
| AP3B1_HUMAN | AP-3 complex subunit beta-1 OS=Homo sapiens GN=AP3B1 PE=1 SV=3                                        | 0.00<br>2437 | 1.61<br>9158 | Yes |

|                 |                                                                                                         |              |              |     |
|-----------------|---------------------------------------------------------------------------------------------------------|--------------|--------------|-----|
| MTA2_H<br>UMAN  | Metastasis-associated protein MTA2 OS=Homo sapiens GN=MTA2 PE=1 SV=1                                    | 0.04<br>8988 | 1.60<br>9491 | Yes |
| LDHB_H<br>UMAN  | L-lactate dehydrogenase B chain OS=Homo sapiens GN=LDHB PE=1 SV=2                                       | 0.01<br>5745 | 1.59<br>0923 | Yes |
| MEP50_<br>HUMAN | Methylosome protein 50 OS=Homo sapiens GN=WDR77 PE=1 SV=1                                               | 0.03<br>9629 | 1.58<br>4602 | Yes |
| GFPT1_<br>HUMAN | Glutamine--fructose-6-phosphate aminotransferase [isomerizing] 1 OS=Homo sapiens GN=GFPT1 PE=1 SV=3     | 0.03<br>0839 | 1.56<br>5989 | Yes |
| LARP1_<br>HUMAN | La-related protein 1 OS=Homo sapiens GN=LARP1 PE=1 SV=2                                                 | 0.02<br>2981 | 1.56<br>4976 | Yes |
| FA98A_<br>HUMAN | Protein FAM98A OS=Homo sapiens GN=FAM98A PE=1 SV=1                                                      | 0.04<br>1505 | 1.56<br>3167 | Yes |
| C1QBP_<br>HUMAN | Complement component 1 Q subcomponent-binding protein, mitochondrial OS=Homo sapiens GN=C1QBP PE=1 SV=1 | 0.04<br>4672 | 1.55<br>592  | Yes |
| BCAT1_<br>HUMAN | Branched-chain-amino-acid aminotransferase, cytosolic OS=Homo sapiens GN=BCAT1 PE=1 SV=3                | 0.00<br>3218 | 1.55<br>2334 | Yes |
| LUZP1_<br>HUMAN | Leucine zipper protein 1 OS=Homo sapiens GN=LUZP1 PE=1 SV=2                                             | 0.00<br>2875 | 1.54<br>6654 | Yes |
| RHOC_H<br>UMAN  | Rho-related GTP-binding protein RhoC OS=Homo sapiens GN=RHOC PE=1 SV=1                                  | 0.01<br>0375 | 1.54<br>1246 | Yes |
| RUVB2_<br>HUMAN | RuvB-like 2 OS=Homo sapiens GN=RUVBL2 PE=1 SV=3                                                         | 0.00<br>1184 | 1.53<br>059  | Yes |
| FBLI1_H<br>UMAN | Filamin-binding LIM protein 1 OS=Homo sapiens GN=FBLIM1 PE=1 SV=2                                       | 0.02<br>0639 | 1.52<br>7326 | Yes |
| LIMA1_<br>HUMAN | LIM domain and actin-binding protein 1 OS=Homo sapiens GN=LIMA1 PE=1 SV=1                               | 0.00<br>7683 | 1.52<br>3271 | Yes |
| VINC_H<br>UMAN  | Vinculin OS=Homo sapiens GN=VCL PE=1 SV=4                                                               | 0.00<br>0628 | 1.51<br>1659 | Yes |
| EIF3L_H<br>UMAN | Eukaryotic translation initiation factor 3 subunit L OS=Homo sapiens GN=EIF3L PE=1 SV=1                 | 0.00<br>1402 | 1.51<br>0181 | Yes |
| SEPT6_H<br>UMAN | Septin-6 OS=Homo sapiens GN=SEPT6 PE=1 SV=4                                                             | 0.00<br>4033 | 1.49<br>971  | Yes |

|             |                                                                                                          |              |              |     |
|-------------|----------------------------------------------------------------------------------------------------------|--------------|--------------|-----|
| AIMP1_HUMAN | Aminoacyl tRNA synthase complex-interacting multifunctional protein 1 OS=Homo sapiens GN=AIMP1 PE=1 SV=2 | 0.01<br>9182 | 1.49<br>0522 | Yes |
| SRC8_HUMAN  | Src substrate cortactin OS=Homo sapiens GN=CTTN PE=1 SV=2                                                | 0.01<br>2512 | 1.48<br>4281 | Yes |
| SYAP1_HUMAN | Synapse-associated protein 1 OS=Homo sapiens GN=SYAP1 PE=1 SV=1                                          | 0.02<br>6561 | 1.48<br>0371 | Yes |
| PHLB1_HUMAN | Pleckstrin homology-like domain family B member 1 OS=Homo sapiens GN=PHLDB1 PE=1 SV=1                    | 0.00<br>7907 | 1.47<br>2458 | Yes |
| FKBP8_HUMAN | Peptidyl-prolyl cis-trans isomerase FKBP8 OS=Homo sapiens GN=FKBP8 PE=1 SV=2                             | 0.00<br>3115 | 1.47<br>0234 | Yes |
| RUVB1_HUMAN | RuvB-like 1 OS=Homo sapiens GN=RUVBL1 PE=1 SV=1                                                          | 0.00<br>2565 | 1.45<br>5219 | Yes |
| CNN2_HUMAN  | Calponin-2 OS=Homo sapiens GN=CNN2 PE=1 SV=4                                                             | 0.00<br>2897 | 1.44<br>2156 | Yes |
| ATX2L_HUMAN | Ataxin-2-like protein OS=Homo sapiens GN=ATXN2L PE=1 SV=2                                                | 0.00<br>2277 | 1.43<br>8212 | Yes |
| HCFC1_HUMAN | Host cell factor 1 OS=Homo sapiens GN=HCFC1 PE=1 SV=2                                                    | 0.00<br>0351 | 1.43<br>1351 | Yes |
| TERA_HUMAN  | Transitional endoplasmic reticulum ATPase OS=Homo sapiens GN=VCP PE=1 SV=4                               | 4.66<br>E-06 | 1.42<br>0736 | Yes |
| RAI14_HUMAN | Ankyrin OS=Homo sapiens GN=RAI14 PE=1 SV=2                                                               | 0.00<br>1474 | 1.41<br>1889 | Yes |
| GNAS1_HUMAN | Guanine nucleotide-binding protein G(s) subunit alpha isoforms XLas OS=Homo sapiens GN=GNAS PE=1 SV=2    | 0.04<br>842  | 1.40<br>8713 | Yes |
| LRRF1_HUMAN | Leucine-rich repeat flightless-interacting protein 1 OS=Homo sapiens GN=LRRFIP1 PE=1 SV=2                | 0.00<br>0613 | 1.39<br>558  | Yes |
| ILK_HUMAN   | Integrin-linked protein kinase OS=Homo sapiens GN=ILK PE=1 SV=2                                          | 0.00<br>6485 | 1.38<br>551  | Yes |
| CLH1_HUMAN  | Clathrin heavy chain 1 OS=Homo sapiens GN=CLTC PE=1 SV=5                                                 | 1.75<br>E-06 | 1.38<br>1501 | Yes |
| DHX30_HUMAN | Putative ATP-dependent RNA helicase DHX30 OS=Homo sapiens GN=DHX30 PE=1 SV=1                             | 0.01<br>7456 | 1.38<br>1024 | Yes |

|                 |                                                                                                 |              |              |     |
|-----------------|-------------------------------------------------------------------------------------------------|--------------|--------------|-----|
| CAV1_H<br>UMAN  | Caveolin-1 OS=Homo sapiens GN=CAV1 PE=1 SV=4                                                    | 0.00<br>2729 | 1.37<br>5915 | Yes |
| AEDO_H<br>UMAN  | 2-aminoethanethiol dioxygenase OS=Homo sapiens OX=9606 GN=ADO<br>PE=1 SV=2                      | 0.00<br>3535 | 1.36<br>3179 | Yes |
| SYIC_H<br>UMAN  | Isoleucine--tRNA ligase, cytoplasmic OS=Homo sapiens GN=IARS PE=1<br>SV=2                       | 0.00<br>1986 | 1.35<br>297  | Yes |
| SYYC_H<br>UMAN  | Tyrosine--tRNA ligase, cytoplasmic OS=Homo sapiens GN=YARS PE=1<br>SV=4                         | 0.00<br>4846 | 1.34<br>7927 | Yes |
| SC22B_<br>HUMAN | Vesicle-trafficking protein SEC22b OS=Homo sapiens GN=SEC22B PE=1<br>SV=4                       | 0.00<br>856  | 1.33<br>5572 | Yes |
| LTOR1_<br>HUMAN | Ragulator complex protein LAMTOR1 OS=Homo sapiens GN=LAMTOR1<br>PE=1 SV=2                       | 0.03<br>546  | 1.30<br>8853 | Yes |
| KLC1_H<br>UMAN  | Kinesin light chain 1 OS=Homo sapiens GN=KLC1 PE=1 SV=2                                         | 0.01<br>7656 | 1.29<br>3252 | Yes |
| FLII_HU<br>MAN  | Protein flightless-1 homolog OS=Homo sapiens GN=FLII PE=1 SV=2                                  | 0.01<br>8979 | 1.28<br>9181 | Yes |
| VASP_H<br>UMAN  | Vasodilator-stimulated phosphoprotein OS=Homo sapiens GN=VASP<br>PE=1 SV=3                      | 0.00<br>9007 | 1.28<br>2259 | Yes |
| SYEP_H<br>UMAN  | Bifunctional glutamate/proline--tRNA ligase OS=Homo sapiens GN=EPRS<br>PE=1 SV=5                | 0.00<br>0204 | 1.27<br>9576 | Yes |
| PURA2_<br>HUMAN | Adenylosuccinate synthetase isozyme 2 OS=Homo sapiens GN=ADSS<br>PE=1 SV=3                      | 0.00<br>6766 | 1.27<br>8024 | Yes |
| EIF3E_H<br>UMAN | Eukaryotic translation initiation factor 3 subunit E OS=Homo sapiens<br>GN=EIF3E PE=1 SV=1      | 0.00<br>2635 | 1.26<br>4111 | Yes |
| PGAM5_<br>HUMAN | Serine/threonine-protein phosphatase PGAM5, mitochondrial OS=Homo<br>sapiens GN=PGAM5 PE=1 SV=2 | 0.01<br>0756 | 1.26<br>4014 | Yes |
| CAPR1_<br>HUMAN | Caprin-1 OS=Homo sapiens GN=CAPRIN1 PE=1 SV=2                                                   | 0.00<br>5167 | 1.26<br>356  | Yes |
| DYHC1_<br>HUMAN | Cytoplasmic dynein 1 heavy chain 1 OS=Homo sapiens GN=DYNC1H1<br>PE=1 SV=5                      | 5.55<br>E-05 | 1.25<br>7431 | Yes |
| UBE2O_<br>HUMAN | (E3-independent) E2 ubiquitin-conjugating enzyme OS=Homo sapiens<br>OX=9606 GN=UBE2O PE=1 SV=3  | 0.02<br>5061 | 1.23<br>823  | Yes |



|             |                                                                                            |              |              |     |
|-------------|--------------------------------------------------------------------------------------------|--------------|--------------|-----|
| AASD1_HUMAN | Alanyl-tRNA editing protein Aarsd1 OS=Homo sapiens GN=AARSD1 PE=1 SV=2                     | 0.04<br>8609 | 1.23<br>2043 | Yes |
| HSP74_HUMAN | Heat shock 70 kDa protein 4 OS=Homo sapiens GN=HSPA4 PE=1 SV=4                             | 0.03<br>4726 | 1.21<br>9856 | Yes |
| E41L3_HUMAN | Band 4.1-like protein 3 OS=Homo sapiens GN=EPB41L3 PE=1 SV=2                               | 0.00<br>8295 | 1.21<br>7962 | Yes |
| FLNC_HUMAN  | Filamin-C OS=Homo sapiens GN=FLNC PE=1 SV=3                                                | 0.00<br>2547 | 1.20<br>8848 | Yes |
| F120A_HUMAN | Constitutive coactivator of PPAR-gamma-like protein 1 OS=Homo sapiens GN=FAM120A PE=1 SV=2 | 0.03<br>8626 | 1.19<br>8264 | Yes |
| SYAC_HUMAN  | Alanine--tRNA ligase, cytoplasmic OS=Homo sapiens GN=AARS PE=1 SV=2                        | 0.02<br>9569 | 1.19<br>456  | Yes |
| FLNA_HUMAN  | Filamin-A OS=Homo sapiens GN=FLNA PE=1 SV=4                                                | 6.82<br>E-06 | 1.18<br>7873 | Yes |
| RAB7A_HUMAN | Ras-related protein Rab-7a OS=Homo sapiens GN=RAB7A PE=1 SV=1                              | 0.00<br>9365 | 1.13<br>3943 | Yes |
| TRI25_HUMAN | E3 ubiquitin/ISG15 ligase TRIM25 OS=Homo sapiens GN=TRIM25 PE=1 SV=2                       | 0.00<br>3466 | 1.13<br>2377 | Yes |
| ZN185_HUMAN | Zinc finger protein 185 OS=Homo sapiens GN=ZNF185 PE=1 SV=3                                | 0.00<br>1509 | 1.12<br>6986 | Yes |
| VATA_HUMAN  | V-type proton ATPase catalytic subunit A OS=Homo sapiens GN=ATP6V1A PE=1 SV=2              | 0.04<br>9112 | 1.11<br>5868 | Yes |
| STRAP_HUMAN | Serine-threonine kinase receptor-associated protein OS=Homo sapiens GN=STRAP PE=1 SV=1     | 0.01<br>7965 | 1.10<br>8508 | Yes |
| SYRC_HUMAN  | Arginine--tRNA ligase, cytoplasmic OS=Homo sapiens GN=RARS PE=1 SV=2                       | 0.01<br>2617 | 1.09<br>948  | Yes |
| SYMC_HUMAN  | Methionine--tRNA ligase, cytoplasmic OS=Homo sapiens GN=MARS PE=1 SV=2                     | 0.00<br>046  | 1.09<br>219  | Yes |
| MYOF_HUMAN  | Myoferlin OS=Homo sapiens GN=MYOF PE=1 SV=1                                                | 0.00<br>532  | 1.08<br>491  | Yes |
| EIF3C_HUMAN | Eukaryotic translation initiation factor 3 subunit C OS=Homo sapiens GN=EIF3C PE=1 SV=1    | 0.01<br>3477 | 1.06<br>8656 | Yes |

|             |                                                                                          |              |              |     |
|-------------|------------------------------------------------------------------------------------------|--------------|--------------|-----|
| AT2A2_HUMAN | Sarcoplasmic/endoplasmic reticulum calcium ATPase 2 OS=Homo sapiens GN=ATP2A2 PE=1 SV=1  | 0.00<br>0751 | 1.04<br>1374 | Yes |
| M4K4_HUMAN  | Mitogen-activated protein kinase kinase kinase 4 OS=Homo sapiens GN=MAP4K4 PE=1 SV=2     | 0.02<br>3262 | 1.03<br>8038 | Yes |
| NOS3_HUMAN  | Nitric oxide synthase, endothelial OS=Homo sapiens GN=NOS3 PE=1 SV=3                     | 0.00<br>7157 | 1.03<br>6758 | Yes |
| VATH_HUMAN  | V-type proton ATPase subunit H OS=Homo sapiens GN=ATP6V1H PE=1 SV=1                      | 0.00<br>7538 | 1.03<br>141  | Yes |
| C1TC_HUMAN  | C-1-tetrahydrofolate synthase, cytoplasmic OS=Homo sapiens GN=MTHFD1 PE=1 SV=3           | 0.02<br>2015 | 1.01<br>3256 | Yes |
| MARE2_HUMAN | Microtubule-associated protein RP/EB family member 2 OS=Homo sapiens GN=MAPRE2 PE=1 SV=1 | 0.01<br>6431 | 1.01<br>0044 | Yes |
| PDCD5_HUMAN | Programmed cell death protein 5 OS=Homo sapiens GN=PDCD5 PE=1 SV=3                       | 0.04<br>094  | 1.00<br>8867 | Yes |
| HS105_HUMAN | Heat shock protein 105 kDa OS=Homo sapiens GN=HSPH1 PE=1 SV=1                            | 0.00<br>1666 | 0.98<br>6707 | Yes |
| VIGLN_HUMAN | Vigilin OS=Homo sapiens GN=HDLBP PE=1 SV=2                                               | 0.00<br>0793 | 0.98<br>3972 | Yes |
| CDC37_HUMAN | Hsp90 co-chaperone Cdc37 OS=Homo sapiens GN=CDC37 PE=1 SV=1                              | 0.01<br>9869 | 0.97<br>4759 | Yes |
| TBA4A_HUMAN | Tubulin alpha-4A chain OS=Homo sapiens GN=TUBA4A PE=1 SV=1                               | 0.02<br>8545 | 0.97<br>369  | Yes |
| IF2B1_HUMAN | Insulin-like growth factor 2 mRNA-binding protein 1 OS=Homo sapiens GN=IGF2BP1 PE=1 SV=2 | 0.03<br>0549 | 0.95<br>3009 | Yes |
| PRS7_HUMAN  | 26S protease regulatory subunit 7 OS=Homo sapiens GN=PSMC2 PE=1 SV=3                     | 0.04<br>4303 | 0.93<br>7132 | Yes |
| EIF3B_HUMAN | Eukaryotic translation initiation factor 3 subunit B OS=Homo sapiens GN=EIF3B PE=1 SV=3  | 0.01<br>991  | 0.90<br>5652 | Yes |
| ICLN_HUMAN  | Methylosome subunit pICln OS=Homo sapiens GN=CLNS1A PE=1 SV=1                            | 0.04<br>4429 | 0.86<br>8975 | Yes |
| IF4B_HUMAN  | Eukaryotic translation initiation factor 4B OS=Homo sapiens GN=EIF4B PE=1 SV=2           | 0.03<br>033  | 0.86<br>6728 | Yes |

|             |                                                                                         |              |                  |     |
|-------------|-----------------------------------------------------------------------------------------|--------------|------------------|-----|
| IMDH2_HUMAN | Inosine-5'-monophosphate dehydrogenase 2 OS=Homo sapiens GN=IMPDH2 PE=1 SV=2            | 0.00<br>4096 | 0.86<br>4842     | Yes |
| LDHA_HUMAN  | L-lactate dehydrogenase A chain OS=Homo sapiens GN=LDHA PE=1 SV=2                       | 0.01<br>3758 | 0.82<br>7844     | Yes |
| PDLI5_HUMAN | PDZ and LIM domain protein 5 OS=Homo sapiens GN=PDLIM5 PE=1 SV=5                        | 0.03<br>6008 | 0.82<br>1118     | Yes |
| IQGA1_HUMAN | Ras GTPase-activating-like protein IQGAP1 OS=Homo sapiens GN=IQGAP1 PE=1 SV=1           | 0.00<br>2834 | 0.79<br>319      | Yes |
| COPA_HUMAN  | Coatomer subunit alpha OS=Homo sapiens GN=COPA PE=1 SV=2                                | 0.01<br>4445 | 0.76<br>972      | Yes |
| PLEC_HUMAN  | Plectin OS=Homo sapiens GN=PLEC PE=1 SV=3                                               | 0.04<br>5634 | 0.74<br>798      | Yes |
| PRS8_HUMAN  | 26S protease regulatory subunit 8 OS=Homo sapiens GN=PSMC5 PE=1 SV=1                    | 0.00<br>4718 | 0.74<br>5663     | Yes |
| EIF3D_HUMAN | Eukaryotic translation initiation factor 3 subunit D OS=Homo sapiens GN=EIF3D PE=1 SV=1 | 0.04<br>7491 | 0.71<br>6681     | Yes |
| TLN1_HUMAN  | Talin-1 OS=Homo sapiens GN=TLN1 PE=1 SV=3                                               | 0.00<br>6367 | 0.70<br>6043     | Yes |
| SEPT9_HUMAN | Septin-9 OS=Homo sapiens GN=SEPT9 PE=1 SV=2                                             | 0.04<br>6431 | 0.66<br>2045     | Yes |
| PRKDC_HUMAN | DNA-dependent protein kinase catalytic subunit OS=Homo sapiens GN=PRKDC PE=1 SV=3       | 0.00<br>109  | 0.65<br>5367     | Yes |
| MYO1C_HUMAN | Unconventional myosin-Ic OS=Homo sapiens GN=MYO1C PE=1 SV=4                             | 0.02<br>6925 | 0.62<br>1684     | Yes |
| MAP4_HUMAN  | Microtubule-associated protein 4 OS=Homo sapiens GN=MAP4 PE=1 SV=3                      | 0.03<br>9769 | 0.59<br>451      | Yes |
| NUCL_HUMAN  | Nucleolin OS=Homo sapiens GN=NCL PE=1 SV=3                                              | 0.03<br>7389 | -<br>0.50<br>081 | Yes |
| ARC1B_HUMAN | Actin-related protein 2/3 complex subunit 1B OS=Homo sapiens GN=ARPC1B PE=1 SV=3        | 0.02<br>8188 | -<br>0.60<br>465 | Yes |

|              |                                                                                                   |              |                  |     |
|--------------|---------------------------------------------------------------------------------------------------|--------------|------------------|-----|
| PYC_HUMAN    | Pyruvate carboxylase, mitochondrial OS=Homo sapiens GN=PC PE=1 SV=2                               | 0.03<br>6599 | -<br>0.67<br>047 | Yes |
| SF3B2_HUMAN  | Splicing factor 3B subunit 2 OS=Homo sapiens GN=SF3B2 PE=1 SV=2                                   | 0.04<br>0266 | -<br>0.67<br>577 | Yes |
| P5CS_HUMAN   | Delta-1-pyrroline-5-carboxylate synthase OS=Homo sapiens GN=ALDH18A1 PE=1 SV=2                    | 0.03<br>1959 | -<br>0.77<br>908 | Yes |
| LYAR_HUMAN   | Cell growth-regulating nucleolar protein OS=Homo sapiens GN=LYAR PE=1 SV=2                        | 0.04<br>3864 | -<br>0.79<br>779 | Yes |
| RBMX_HUMAN   | RNA-binding motif protein, X chromosome OS=Homo sapiens GN=RBMX PE=1 SV=3                         | 0.00<br>3718 | -<br>1.21<br>503 | Yes |
| EIF1AX_HUMAN | Eukaryotic translation initiation factor 1A, X-chromosomal OS=Homo sapiens GN=EIF1AX PE=1 SV=2    | 0.00<br>0181 | -<br>1.21<br>827 | Yes |
| SETLP_HUMAN  | Protein SETSIP OS=Homo sapiens GN=SETSIP PE=1 SV=1                                                | 0.01<br>8509 | -<br>1.24<br>764 | Yes |
| ODPB_HUMAN   | Pyruvate dehydrogenase E1 component subunit beta, mitochondrial OS=Homo sapiens GN=PDHB PE=1 SV=3 | 0.01<br>8236 | -<br>1.35<br>935 | Yes |
| EFTS_HUMAN   | Elongation factor Ts, mitochondrial OS=Homo sapiens GN=TSFM PE=1 SV=2                             | 0.01<br>4748 | -<br>1.40<br>717 | Yes |
| CATZ_HUMAN   | Cathepsin Z OS=Homo sapiens GN=CTSZ PE=1 SV=1                                                     | 0.01<br>3241 | -<br>1.55<br>922 | Yes |
| PSB5_HUMAN   | Proteasome subunit beta type-5 OS=Homo sapiens GN=PSMB5 PE=1 SV=3                                 | 0.00<br>9484 | -<br>1.56<br>471 | Yes |
| CATA_HUMAN   | Catalase OS=Homo sapiens GN=CAT PE=1 SV=3                                                         | 0.01<br>5513 | -<br>1.67<br>223 | Yes |

|             |                                                                                                   |              |                  |     |
|-------------|---------------------------------------------------------------------------------------------------|--------------|------------------|-----|
| AN32B_HUMAN | Acidic leucine-rich nuclear phosphoprotein 32 family member B OS=Homo sapiens GN=ANP32B PE=1 SV=1 | 0.04<br>5014 | -<br>1.77<br>358 | Yes |
| K2C1_HUMAN  | Keratin, type II cytoskeletal 1 OS=Homo sapiens GN=KRT1 PE=1 SV=6                                 | 0.01<br>4714 | -<br>1.79<br>591 | Yes |
| UBC12_HUMAN | NEDD8-conjugating enzyme Ubc12 OS=Homo sapiens OX=9606 GN=UBE2M PE=1 SV=1                         | 0.02<br>8444 | -<br>1.95<br>156 | Yes |
| ARGL1_HUMAN | Arginine and glutamate-rich protein 1 OS=Homo sapiens GN=ARGLU1 PE=1 SV=1                         | 0.02<br>0226 | -<br>1.97<br>655 | Yes |
| CALM1_HUMAN | Calmodulin-1 OS=Homo sapiens OX=9606 GN=CALM1 PE=1 SV=1                                           | 0.03<br>5154 | -<br>2.22<br>427 | Yes |
| K1C9_HUMAN  | Keratin, type I cytoskeletal 9 OS=Homo sapiens GN=KRT9 PE=1 SV=3                                  | 0.01<br>7709 | -<br>2.38<br>041 | Yes |
| MPPB_HUMAN  | Mitochondrial-processing peptidase subunit beta OS=Homo sapiens OX=9606 GN=PMPCB PE=1 SV=2        | 0.01<br>7833 | -<br>2.41<br>27  | Yes |
| EBP2_HUMAN  | Probable rRNA-processing protein EBP2 OS=Homo sapiens GN=EBNA1BP2 PE=1 SV=2                       | 0.04<br>0953 | -<br>2.73<br>658 | Yes |
| RM23_HUMAN  | 39S ribosomal protein L23, mitochondrial OS=Homo sapiens OX=9606 GN=MRPL23 PE=1 SV=1              | 0.02<br>0351 | -<br>2.84<br>405 | Yes |
| RM22_HUMAN  | 39S ribosomal protein L22, mitochondrial OS=Homo sapiens GN=MRPL22 PE=1 SV=1                      | 0.00<br>6129 | -<br>3.30<br>197 | Yes |
| RIR2_HUMAN  | Ribonucleoside-diphosphate reductase subunit M2 OS=Homo sapiens GN=RRM2 PE=1 SV=1                 | 0.01<br>2398 | -<br>4.09<br>256 | Yes |

**Table S3. Full list of proteins identified by Rab27a-eGFP-APEX2 proximity in HAI stimulated endothelial cells**

| Acc         | Prot Name                                                                                                    | p value  | fold (log <sub>2</sub> scale) | Significant |
|-------------|--------------------------------------------------------------------------------------------------------------|----------|-------------------------------|-------------|
| MAST4_HUMAN | Microtubule-associated serine/threonine-protein kinase 4 OS=Homo sapiens GN=MAST4 PE=1 SV=3                  | 9.32E-05 | 7.529023                      | Yes         |
| UN13D_HUMAN | Protein unc-13 homolog D OS=Homo sapiens GN=UNC13D PE=1 SV=1                                                 | 0.000178 | 7.45639                       | Yes         |
| MX1_HUMAN   | Interferon-induced GTP-binding protein Mx1 OS=Homo sapiens GN=MX1 PE=1 SV=4                                  | 0.006616 | 7.160117                      | Yes         |
| COBL1_HUMAN | Cordon-bleu protein-like 1 OS=Homo sapiens GN=COBLL1 PE=1 SV=2                                               | 0.016161 | 7.024407                      | Yes         |
| MAP1A_HUMAN | Microtubule-associated protein 1A OS=Homo sapiens OX=9606 GN=MAP1A PE=1 SV=6                                 | 0.019909 | 6.952749                      | Yes         |
| STA13_HUMAN | StAR-related lipid transfer protein 13 OS=Homo sapiens OX=9606 GN=STARD13 PE=1 SV=2                          | 1.08E-06 | 6.83697                       | Yes         |
| BCAR1_HUMAN | Breast cancer anti-estrogen resistance protein 1 OS=Homo sapiens GN=BCAR1 PE=1 SV=2                          | 0.000257 | 6.82392                       | Yes         |
| GBF1_HUMAN  | Golgi-specific brefeldin A-resistance guanine nucleotide exchange factor 1 OS=Homo sapiens GN=GBF1 PE=1 SV=2 | 0.000493 | 6.795715                      | Yes         |
| BCR_HUMAN   | Breakpoint cluster region protein OS=Homo sapiens GN=BCR PE=1 SV=2                                           | 3.78E-05 | 6.676825                      | Yes         |
| RN213_HUMAN | E3 ubiquitin-protein ligase RNF213 OS=Homo sapiens GN=RNF213 PE=1 SV=3                                       | 0.000195 | 6.664777                      | Yes         |
| JIP4_HUMAN  | C-Jun-amino-terminal kinase-interacting protein 4 OS=Homo sapiens GN=SPAG9 PE=1 SV=4                         | 1.01E-06 | 6.583016                      | Yes         |
| GOGA2_HUMAN | Golgin subfamily A member 2 OS=Homo sapiens GN=GOLGA2 PE=1 SV=3                                              | 4.59E-05 | 6.350477                      | Yes         |
| NAV3_HUMAN  | Neuron navigator 3 OS=Homo sapiens GN=NAV3 PE=1 SV=3                                                         | 0.024298 | 6.320717                      | Yes         |
| TMCC3_HUMAN | Transmembrane and coiled-coil domains protein 3 OS=Homo sapiens GN=TMCC3 PE=2 SV=3                           | 0.025464 | 6.30649                       | Yes         |
| CLAP1_HUMAN | CLIP-associating protein 1 OS=Homo sapiens GN=CLASP1 PE=1 SV=1                                               | 0.003281 | 6.262151                      | Yes         |
| GOPC_HUMAN  | Golgi-associated PDZ and coiled-coil motif-containing protein OS=Homo sapiens GN=GOPC PE=1 SV=1              | 4.21E-07 | 6.259285                      | Yes         |

|             |                                                                                                             |                  |                  |     |
|-------------|-------------------------------------------------------------------------------------------------------------|------------------|------------------|-----|
| COG1_HUMAN  | Conserved oligomeric Golgi complex subunit 1 OS=Homo sapiens GN=COG1 PE=1 SV=1                              | 0.00<br>350<br>6 | 6.12<br>602<br>6 | Yes |
| HGS_HUMAN   | Hepatocyte growth factor-regulated tyrosine kinase substrate OS=Homo sapiens GN=HGS PE=1 SV=1               | 1.56<br>E-<br>05 | 6.12<br>467      | Yes |
| TRAD1_HUMAN | TRAF-type zinc finger domain-containing protein 1 OS=Homo sapiens OX=9606 GN=TRAFD1 PE=1 SV=1               | 0.02<br>358      | 6.08<br>684<br>8 | Yes |
| GOGA5_HUMAN | Golgin subfamily A member 5 OS=Homo sapiens GN=GOLGA5 PE=1 SV=3                                             | 4.74<br>E-<br>07 | 6.07<br>105<br>3 | Yes |
| KLC2_HUMAN  | Kinesin light chain 2 OS=Homo sapiens GN=KLC2 PE=1 SV=1                                                     | 0.01<br>978<br>5 | 6.03<br>244<br>1 | Yes |
| STAM2_HUMAN | Signal transducing adapter molecule 2 OS=Homo sapiens GN=STAM2 PE=1 SV=1                                    | 0.00<br>835<br>8 | 6.02<br>641<br>7 | Yes |
| GCP3_HUMAN  | Gamma-tubulin complex component 3 OS=Homo sapiens GN=TUBGCP3 PE=1 SV=2                                      | 0.01<br>324      | 6.01<br>442<br>5 | Yes |
| FRM4A_HUMAN | FERM domain-containing protein 4A OS=Homo sapiens GN=FRMD4A PE=1 SV=3                                       | 0.01<br>439<br>8 | 5.98<br>993<br>6 | Yes |
| UACA_HUMAN  | Uveal autoantigen with coiled-coil domains and ankyrin repeats OS=Homo sapiens GN=UACA PE=1 SV=2            | 0.00<br>651<br>3 | 5.96<br>701<br>5 | Yes |
| PRRC1_HUMAN | Protein PRRC1 OS=Homo sapiens OX=9606 GN=PRRC1 PE=1 SV=1                                                    | 0.00<br>016<br>5 | 5.94<br>966      | Yes |
| 41_HUMAN    | Protein 4.1 OS=Homo sapiens OX=9606 GN=EPB41 PE=1 SV=4                                                      | 0.04<br>310<br>5 | 5.94<br>411<br>6 | Yes |
| TGFI1_HUMAN | Transforming growth factor beta-1-induced transcript 1 protein OS=Homo sapiens OX=9606 GN=TGFB1I1 PE=1 SV=2 | 0.01<br>004<br>2 | 5.93<br>563<br>1 | Yes |
| PRC2B_HUMAN | Protein PRRC2B OS=Homo sapiens GN=PRRC2B PE=1 SV=2                                                          | 0.01<br>165<br>2 | 5.88<br>661<br>7 | Yes |
| RHG21_HUMAN | Rho GTPase-activating protein 21 OS=Homo sapiens GN=ARHGAP21 PE=1 SV=1                                      | 0.00<br>400<br>6 | 5.88<br>351<br>5 | Yes |
| DJC13_HUMAN | DnaJ homolog subfamily C member 13 OS=Homo sapiens GN=DNAJC13 PE=1 SV=5                                     | 1.01<br>E-<br>05 | 5.87<br>968<br>9 | Yes |
| GOGA3_HUMAN | Golgin subfamily A member 3 OS=Homo sapiens GN=GOLGA3 PE=1 SV=2                                             | 1.53<br>E-<br>05 | 5.65<br>643<br>4 | Yes |
| DOCK4_HUMAN | Dedicator of cytokinesis protein 4 OS=Homo sapiens GN=DOCK4 PE=1 SV=3                                       | 0.00<br>603<br>4 | 5.58<br>632<br>1 | Yes |
| VP37A_HUMAN | Vacuolar protein sorting-associated protein 37A OS=Homo sapiens OX=9606 GN=VPS37A PE=1 SV=1                 | 0.00<br>019<br>9 | 5.50<br>694<br>9 | Yes |



|             |                                                                                                    |                  |                  |     |
|-------------|----------------------------------------------------------------------------------------------------|------------------|------------------|-----|
| CASP_HUMAN  | Protein CASP OS=Homo sapiens OX=9606 GN=CUX1 PE=1 SV=2                                             | 0.00<br>532<br>3 | 5.50<br>611      | Yes |
| RFIP5_HUMAN | Rab11 family-interacting protein 5 OS=Homo sapiens GN=RAB11FIP5 PE=1 SV=1                          | 5.75<br>E-<br>06 | 5.41<br>608<br>7 | Yes |
| GOSR1_HUMAN | Golgi SNAP receptor complex member 1 OS=Homo sapiens OX=9606 GN=GOSR1 PE=1 SV=1                    | 0.00<br>143      | 5.39<br>162<br>7 | Yes |
| HELZ2_HUMAN | Helicase with zinc finger domain 2 OS=Homo sapiens OX=9606 GN=HELZ2 PE=1 SV=6                      | 0.02<br>586<br>1 | 5.35<br>861<br>9 | Yes |
| NFKB2_HUMAN | Nuclear factor NF-kappa-B p100 subunit OS=Homo sapiens GN=NFKB2 PE=1 SV=4                          | 0.00<br>020<br>6 | 5.32<br>941<br>8 | Yes |
| UBP8_HUMAN  | Ubiquitin carboxyl-terminal hydrolase 8 OS=Homo sapiens GN=USP8 PE=1 SV=1                          | 0.00<br>915<br>4 | 5.31<br>788<br>3 | Yes |
| IFIT3_HUMAN | Interferon-induced protein with tetratricopeptide repeats 3 OS=Homo sapiens GN=IFIT3 PE=1 SV=1     | 0.00<br>074<br>5 | 5.30<br>05       | Yes |
| A16A1_HUMAN | Aldehyde dehydrogenase family 16 member A1 OS=Homo sapiens GN=ALDH16A1 PE=1 SV=2                   | 0.02<br>499<br>3 | 5.22<br>742<br>1 | Yes |
| SYTL4_HUMAN | Synaptotagmin-like protein 4 OS=Homo sapiens GN=SYTL4 PE=1 SV=2                                    | 0.00<br>013<br>2 | 5.21<br>608<br>5 | Yes |
| WNK1_HUMAN  | Serine/threonine-protein kinase WNK1 OS=Homo sapiens GN=WNK1 PE=1 SV=2                             | 0.00<br>236<br>9 | 5.21<br>166<br>1 | Yes |
| STX5_HUMAN  | Syntaxin-5 OS=Homo sapiens OX=9606 GN=STX5 PE=1 SV=2                                               | 0.03<br>536<br>8 | 5.18<br>928<br>9 | Yes |
| BD1L1_HUMAN | Biorientation of chromosomes in cell division protein 1-like 1 OS=Homo sapiens GN=BOD1L1 PE=1 SV=2 | 0.03<br>042<br>4 | 5.15<br>201<br>4 | Yes |
| GOGA1_HUMAN |                                                                                                    | 0.03<br>881<br>6 | 5.14<br>579<br>3 | Yes |
| GIT1_HUMAN  | ARF GTPase-activating protein GIT1 OS=Homo sapiens GN=GIT1 PE=1 SV=2                               | 0.00<br>117<br>2 | 5.13<br>331<br>7 | Yes |
| KDIS_HUMAN  | Kinase D-interacting substrate of 220 kDa OS=Homo sapiens OX=9606 GN=KIDINS220 PE=1 SV=3           | 0.04<br>888<br>8 | 5.11<br>875<br>3 | Yes |
| VP13C_HUMAN | Vacuolar protein sorting-associated protein 13C OS=Homo sapiens GN=VPS13C PE=1 SV=1                | 0.00<br>765<br>8 | 5.08<br>990<br>7 | Yes |
| BIG2_HUMAN  | Brefeldin A-inhibited guanine nucleotide-exchange protein 2 OS=Homo sapiens GN=ARFGEF2 PE=1 SV=3   | 0.01<br>496<br>7 | 5.08<br>118<br>5 | Yes |
| UBXN4_HUMAN | UBX domain-containing protein 4 OS=Homo sapiens OX=9606 GN=UBXN4 PE=1 SV=2                         | 6.23<br>E-<br>05 | 5.07<br>705<br>3 | Yes |

|             |                                                                                                     |                  |                  |     |
|-------------|-----------------------------------------------------------------------------------------------------|------------------|------------------|-----|
| RELB_HUMAN  | Transcription factor RelB OS=Homo sapiens OX=9606 GN=RELB PE=1 SV=2                                 | 0.00<br>147<br>4 | 5.05<br>855<br>9 | Yes |
| TPPC8_HUMAN | Trafficking protein particle complex subunit 8 OS=Homo sapiens OX=9606 GN=TRAPPC8 PE=1 SV=2         | 0.00<br>073<br>6 | 5.03<br>587<br>1 | Yes |
| IFIT1_HUMAN | Interferon-induced protein with tetratricopeptide repeats 1 OS=Homo sapiens GN=IFIT1 PE=1 SV=2      | 0.00<br>034<br>7 | 5.02<br>506<br>2 | Yes |
| RB27A_HUMAN | Ras-related protein Rab-27A OS=Homo sapiens GN=RAB27A PE=1 SV=3                                     | 6.24<br>E-<br>06 | 5.02<br>114<br>5 | Yes |
| GCP60_HUMAN | Golgi resident protein GCP60 OS=Homo sapiens GN=ACBD3 PE=1 SV=4                                     | 0.01<br>410<br>9 | 5.01<br>607<br>4 | Yes |
| CCDC6_HUMAN | Coiled-coil domain-containing protein 6 OS=Homo sapiens GN=CCDC6 PE=1 SV=2                          | 9.18<br>E-<br>05 | 5.01<br>494<br>3 | Yes |
| KIF11_HUMAN | Kinesin-like protein KIF11 OS=Homo sapiens OX=9606 GN=KIF11 PE=1 SV=2                               | 0.00<br>288<br>3 | 5.00<br>847<br>6 | Yes |
| CBSL_HUMAN  | Cystathionine beta-synthase-like protein OS=Homo sapiens OX=9606 GN=CBSL PE=1 SV=1                  | 0.00<br>609<br>3 | 5.00<br>250<br>8 | Yes |
| MYCB2_HUMAN | E3 ubiquitin-protein ligase MYCBP2 OS=Homo sapiens GN=MYCBP2 PE=1 SV=3                              | 2.16<br>E-<br>05 | 4.99<br>835      | Yes |
| PLXD1_HUMAN | Plexin-D1 OS=Homo sapiens GN=PLXND1 PE=1 SV=3                                                       | 0.00<br>332<br>2 | 4.99<br>485<br>3 | Yes |
| TBCD4_HUMAN | TBC1 domain family member 4 OS=Homo sapiens GN=TBC1D4 PE=1 SV=2                                     | 0.00<br>014<br>5 | 4.97<br>299<br>7 | Yes |
| M4K2_HUMAN  | Mitogen-activated protein kinase kinase kinase kinase 2 OS=Homo sapiens OX=9606 GN=MAP4K2 PE=1 SV=2 | 0.00<br>784<br>3 | 4.93<br>233<br>4 | Yes |
| SNP29_HUMAN | Synaptosomal-associated protein 29 OS=Homo sapiens GN=SNAP29 PE=1 SV=1                              | 0.00<br>742<br>3 | 4.92<br>918<br>2 | Yes |
| CPIN1_HUMAN | Anamorsin OS=Homo sapiens GN=CIAPIN1 PE=1 SV=2                                                      | 0.00<br>072<br>3 | 4.92<br>812<br>6 | Yes |
| RPGF2_HUMAN | Rap guanine nucleotide exchange factor 2 OS=Homo sapiens OX=9606 GN=RAPGEF2 PE=1 SV=1               | 0.00<br>208<br>2 | 4.92<br>797<br>2 | Yes |
| IF4G3_HUMAN | Eukaryotic translation initiation factor 4 gamma 3 OS=Homo sapiens GN=EIF4G3 PE=1 SV=2              | 0.00<br>223<br>2 | 4.89<br>225<br>4 | Yes |
| TRIPB_HUMAN | Thyroid receptor-interacting protein 11 OS=Homo sapiens GN=TRIP11 PE=1 SV=3                         | 0.00<br>020<br>2 | 4.87<br>043<br>8 | Yes |
| PTN23_HUMAN | Tyrosine-protein phosphatase non-receptor type 23 OS=Homo sapiens GN=PTPN23 PE=1 SV=1               | 0.00<br>015<br>8 | 4.86<br>937<br>4 | Yes |

|             |                                                                                                  |                  |                  |     |
|-------------|--------------------------------------------------------------------------------------------------|------------------|------------------|-----|
| AFTIN_HUMAN | Aftiphilin OS=Homo sapiens OX=9606 GN=AFTPH PE=1 SV=3                                            | 0.00<br>676<br>6 | 4.86<br>385<br>9 | Yes |
| SASH1_HUMAN | SAM and SH3 domain-containing protein 1 OS=Homo sapiens GN=SASH1 PE=1 SV=3                       | 0.00<br>851<br>8 | 4.85<br>594<br>9 | Yes |
| ARHGC_HUMAN | Rho guanine nucleotide exchange factor 12 OS=Homo sapiens GN=ARHGEF12 PE=1 SV=1                  | 0.01<br>456      | 4.85<br>108<br>3 | Yes |
| TTC37_HUMAN | Tetratricopeptide repeat protein 37 OS=Homo sapiens GN=TTC37 PE=1 SV=1                           | 0.00<br>069<br>8 | 4.80<br>421<br>7 | Yes |
| TMF1_HUMAN  | TATA element modulatory factor OS=Homo sapiens GN=TMF1 PE=1 SV=2                                 | 2.12<br>E-<br>07 | 4.79<br>929<br>7 | Yes |
| TACC1_HUMAN | Transforming acidic coiled-coil-containing protein 1 OS=Homo sapiens GN=TACC1 PE=1 SV=2          | 1.92<br>E-<br>06 | 4.78<br>668<br>8 | Yes |
| RIN2_HUMAN  | Ras and Rab interactor 2 OS=Homo sapiens OX=9606 GN=RIN2 PE=1 SV=1                               | 0.00<br>358<br>5 | 4.76<br>062<br>9 | Yes |
| ZNFX1_HUMAN | NFX1-type zinc finger-containing protein 1 OS=Homo sapiens GN=ZNFX1 PE=2 SV=2                    | 0.02<br>465<br>2 | 4.75<br>485<br>9 | Yes |
| CDK17_HUMAN | Cyclin-dependent kinase 17 OS=Homo sapiens GN=CDK17 PE=1 SV=2                                    | 0.00<br>374<br>5 | 4.74<br>659<br>7 | Yes |
| TJAP1_HUMAN | Tight junction-associated protein 1 OS=Homo sapiens GN=TJAP1 PE=1 SV=1                           | 0.00<br>869<br>8 | 4.74<br>430<br>4 | Yes |
| KPCD2_HUMAN | Serine/threonine-protein kinase D2 OS=Homo sapiens GN=PRKD2 PE=1 SV=2                            | 0.01<br>386<br>8 | 4.74<br>152<br>7 | Yes |
| GCC2_HUMAN  | GRIP and coiled-coil domain-containing protein 2 OS=Homo sapiens GN=GCC2 PE=1 SV=4               | 4.00<br>E-<br>05 | 4.73<br>718<br>3 | Yes |
| TBK1_HUMAN  | Serine/threonine-protein kinase TBK1 OS=Homo sapiens OX=9606 GN=TBK1 PE=1 SV=1                   | 0.00<br>299<br>6 | 4.70<br>027<br>5 | Yes |
| ZW10_HUMAN  | Centromere/kinetochore protein zw10 homolog OS=Homo sapiens GN=ZW10 PE=1 SV=3                    | 9.51<br>E-<br>05 | 4.69<br>916<br>4 | Yes |
| RNF31_HUMAN | E3 ubiquitin-protein ligase RNF31 OS=Homo sapiens OX=9606 GN=RNF31 PE=1 SV=1                     | 0.04<br>387<br>4 | 4.69<br>772<br>5 | Yes |
| AFAD_HUMAN  | Afadin OS=Homo sapiens GN=MLLT4 PE=1 SV=3                                                        | 0.03<br>236<br>4 | 4.69<br>401<br>3 | Yes |
| AAPK1_HUMAN | 5'-AMP-activated protein kinase catalytic subunit alpha-1 OS=Homo sapiens GN=PRKAA1 PE=1 SV=4    | 0.02<br>493<br>2 | 4.67<br>680<br>3 | Yes |
| BIG1_HUMAN  | Brefeldin A-inhibited guanine nucleotide-exchange protein 1 OS=Homo sapiens GN=ARFGEF1 PE=1 SV=2 | 2.89<br>E-<br>06 | 4.67<br>625<br>3 | Yes |

|             |                                                                                                               |                  |                  |     |
|-------------|---------------------------------------------------------------------------------------------------------------|------------------|------------------|-----|
| PAR14_HUMAN | Poly [ADP-ribose] polymerase 14 OS=Homo sapiens GN=PARP14 PE=1 SV=3                                           | 0.02<br>681<br>1 | 4.66<br>678      | Yes |
| VPS16_HUMAN | Vacuolar protein sorting-associated protein 16 homolog OS=Homo sapiens OX=9606 GN=VPS16 PE=1 SV=2             | 0.00<br>149<br>6 | 4.66<br>478<br>8 | Yes |
| PTN12_HUMAN | Tyrosine-protein phosphatase non-receptor type 12 OS=Homo sapiens GN=PTPN12 PE=1 SV=3                         | 5.09<br>E-<br>07 | 4.66<br>017<br>2 | Yes |
| USP9X_HUMAN | Probable ubiquitin carboxyl-terminal hydrolase FAF-X OS=Homo sapiens GN=USP9X PE=1 SV=3                       | 2.35<br>E-<br>05 | 4.65<br>941<br>9 | Yes |
| AKA11_HUMAN | A-kinase anchor protein 11 OS=Homo sapiens OX=9606 GN=AKAP11 PE=1 SV=1                                        | 0.00<br>593<br>6 | 4.64<br>312<br>7 | Yes |
| FBX30_HUMAN | F-box only protein 30 OS=Homo sapiens OX=9606 GN=FBXO30 PE=1 SV=3                                             | 0.00<br>747<br>2 | 4.61<br>761      | Yes |
| RICTR_HUMAN | Rapamycin-insensitive companion of mTOR OS=Homo sapiens OX=9606 GN=RICTOR PE=1 SV=1                           | 0.00<br>149<br>1 | 4.61<br>459<br>1 | Yes |
| HIP1R_HUMAN | Huntingtin-interacting protein 1-related protein OS=Homo sapiens GN=HIP1R PE=1 SV=2                           | 2.32<br>E-<br>05 | 4.58<br>700<br>6 | Yes |
| NHSL1_HUMAN | NHS-like protein 1 OS=Homo sapiens OX=9606 GN=NHSL1 PE=1 SV=2                                                 | 3.65<br>E-<br>05 | 4.58<br>563<br>8 | Yes |
| SAHH2_HUMAN | S-adenosylhomocysteine hydrolase-like protein 1 OS=Homo sapiens OX=9606 GN=AHCYL1 PE=1 SV=2                   | 0.02<br>793<br>8 | 4.57<br>781      | Yes |
| S12A2_HUMAN | Solute carrier family 12 member 2 OS=Homo sapiens OX=9606 GN=SLC12A2 PE=1 SV=1                                | 0.00<br>013<br>5 | 4.56<br>371<br>6 | Yes |
| MAGD1_HUMAN | Melanoma-associated antigen D1 OS=Homo sapiens OX=9606 GN=MAGED1 PE=1 SV=3                                    | 0.00<br>266<br>4 | 4.54<br>853<br>2 | Yes |
| DCTN4_HUMAN | Dynactin subunit 4 OS=Homo sapiens GN=DCTN4 PE=1 SV=1                                                         | 0.01<br>722<br>1 | 4.52<br>132<br>3 | Yes |
| FBLI1_HUMAN | Filamin-binding LIM protein 1 OS=Homo sapiens GN=FBLIM1 PE=1 SV=2                                             | 7.87<br>E-<br>05 | 4.51<br>604<br>3 | Yes |
| DOC10_HUMAN | Dedicator of cytokinesis protein 10 OS=Homo sapiens GN=DOCK10 PE=1 SV=3                                       | 9.02<br>E-<br>05 | 4.50<br>602<br>9 | Yes |
| HECD1_HUMAN | E3 ubiquitin-protein ligase HECTD1 OS=Homo sapiens GN=HECTD1 PE=1 SV=3                                        | 0.00<br>403<br>3 | 4.49<br>424<br>2 | Yes |
| ARAP3_HUMAN | Arf-GAP with Rho-GAP domain, ANK repeat and PH domain-containing protein 3 OS=Homo sapiens GN=ARAP3 PE=1 SV=1 | 5.80<br>E-<br>06 | 4.49<br>196<br>3 | Yes |
| ANR17_HUMAN | Ankyrin repeat domain-containing protein 17 OS=Homo sapiens GN=ANKRD17 PE=1 SV=3                              | 0.02<br>680<br>9 | 4.48<br>667<br>2 | Yes |

|             |                                                                                                              |          |          |     |
|-------------|--------------------------------------------------------------------------------------------------------------|----------|----------|-----|
| INF2_HUMAN  | Inverted formin-2 OS=Homo sapiens GN=INF2 PE=1 SV=2                                                          | 4.17E-05 | 4.475764 | Yes |
| MINK1_HUMAN | Misshapen-like kinase 1 OS=Homo sapiens GN=MINK1 PE=1 SV=2                                                   | 0.010941 | 4.462817 | Yes |
| GCC1_HUMAN  | GRIP and coiled-coil domain-containing protein 1 OS=Homo sapiens OX=9606 GN=GCC1 PE=1 SV=1                   | 0.000604 | 4.445507 | Yes |
| LRBA_HUMAN  | Lipopolysaccharide-responsive and beige-like anchor protein OS=Homo sapiens GN=LRBA PE=1 SV=4                | 1.89E-06 | 4.425611 | Yes |
| DEN4C_HUMAN | DENN domain-containing protein 4C OS=Homo sapiens OX=9606 GN=DENND4C PE=1 SV=3                               | 0.018204 | 4.422899 | Yes |
| ARG28_HUMAN | Rho guanine nucleotide exchange factor 28 OS=Homo sapiens OX=9606 GN=ARHGEF28 PE=1 SV=3                      | 0.009518 | 4.40911  | Yes |
| CARM1_HUMAN | Histone-arginine methyltransferase CARM1 OS=Homo sapiens GN=CARM1 PE=1 SV=3                                  | 0.000132 | 4.40734  | Yes |
| PP12C_HUMAN | Protein phosphatase 1 regulatory subunit 12C OS=Homo sapiens GN=PPP1R12C PE=1 SV=1                           | 0.000101 | 4.399292 | Yes |
| SH3B4_HUMAN | SH3 domain-binding protein 4 OS=Homo sapiens GN=SH3BP4 PE=1 SV=1                                             | 0.008366 | 4.326221 | Yes |
| PSMF1_HUMAN | Proteasome inhibitor PI31 subunit OS=Homo sapiens OX=9606 GN=PSMF1 PE=1 SV=2                                 | 0.000256 | 4.289907 | Yes |
| KCC2B_HUMAN | Calcium/calmodulin-dependent protein kinase type II subunit beta OS=Homo sapiens OX=9606 GN=CAMK2B PE=1 SV=3 | 0.011962 | 4.287927 | Yes |
| NEK9_HUMAN  | Serine/threonine-protein kinase Nek9 OS=Homo sapiens GN=NEK9 PE=1 SV=2                                       | 0.000116 | 4.282126 | Yes |
| CNOT1_HUMAN | CCR4-NOT transcription complex subunit 1 OS=Homo sapiens GN=CNOT1 PE=1 SV=2                                  | 0.000629 | 4.26576  | Yes |
| ZDH13_HUMAN | Palmitoyltransferase ZDHHC13 OS=Homo sapiens GN=ZDHHC13 PE=1 SV=3                                            | 0.007971 | 4.259202 | Yes |
| UBP15_HUMAN | Ubiquitin carboxyl-terminal hydrolase 15 OS=Homo sapiens GN=USP15 PE=1 SV=3                                  | 0.000498 | 4.258341 | Yes |
| ACBD5_HUMAN | Acyl-CoA-binding domain-containing protein 5 OS=Homo sapiens OX=9606 GN=ACBD5 PE=1 SV=1                      | 0.00394  | 4.249339 | Yes |
| PDE3A_HUMAN | cGMP-inhibited 3',5'-cyclic phosphodiesterase A OS=Homo sapiens GN=PDE3A PE=1 SV=3                           | 0.002324 | 4.246592 | Yes |
| SPIR1_HUMAN | Protein spire homolog 1 OS=Homo sapiens OX=9606 GN=SPIRE1 PE=1 SV=3                                          | 0.023061 | 4.23578  | Yes |

|             |                                                                                                   |                  |                  |     |
|-------------|---------------------------------------------------------------------------------------------------|------------------|------------------|-----|
| NU153_HUMAN | Nuclear pore complex protein Nup153 OS=Homo sapiens GN=NUP153 PE=1 SV=2                           | 0.00<br>031<br>2 | 4.20<br>567<br>4 | Yes |
| NUDC2_HUMAN | NudC domain-containing protein 2 OS=Homo sapiens OX=9606 GN=NUDCD2 PE=1 SV=1                      | 0.03<br>179<br>7 | 4.19<br>870<br>2 | Yes |
| ITB4_HUMAN  | Integrin beta-4 OS=Homo sapiens GN=ITGB4 PE=1 SV=5                                                | 0.01<br>199<br>5 | 4.19<br>729<br>8 | Yes |
| OSBL9_HUMAN | Oxysterol-binding protein-related protein 9 OS=Homo sapiens OX=9606 GN=OSBPL9 PE=1 SV=2           | 0.00<br>090<br>1 | 4.19<br>409<br>3 | Yes |
| SRG2B_HUMAN | SLIT-ROBO Rho GTPase-activating protein 2B OS=Homo sapiens OX=9606 GN=SRGAP2B PE=3 SV=1           | 0.01<br>045<br>2 | 4.19<br>005<br>2 | Yes |
| ARFG3_HUMAN | ADP-ribosylation factor GTPase-activating protein 3 OS=Homo sapiens GN=ARFGAP3 PE=1 SV=1          | 0.00<br>130<br>4 | 4.18<br>713<br>9 | Yes |
| PDXD1_HUMAN | Pyridoxal-dependent decarboxylase domain-containing protein 1 OS=Homo sapiens GN=PDXDC1 PE=1 SV=2 | 3.51<br>E-<br>06 | 4.18<br>564<br>8 | Yes |
| ARHG7_HUMAN | Rho guanine nucleotide exchange factor 7 OS=Homo sapiens OX=9606 GN=ARHGEF7 PE=1 SV=2             | 0.01<br>846<br>2 | 4.18<br>087<br>6 | Yes |
| S23IP_HUMAN | SEC23-interacting protein OS=Homo sapiens GN=SEC23IP PE=1 SV=1                                    | 2.76<br>E-<br>05 | 4.16<br>510<br>7 | Yes |
| CGNL1_HUMAN | Cingulin-like protein 1 OS=Homo sapiens GN=CGNL1 PE=1 SV=2                                        | 0.04<br>927<br>4 | 4.16<br>506<br>7 | Yes |
| MILK1_HUMAN | MICAL-like protein 1 OS=Homo sapiens OX=9606 GN=MICALL1 PE=1 SV=2                                 | 0.01<br>214<br>8 | 4.16<br>384<br>4 | Yes |
| SPART_HUMAN | Spartin OS=Homo sapiens OX=9606 GN=SPART PE=1 SV=1                                                | 0.00<br>025<br>7 | 4.14<br>966<br>2 | Yes |
| DOCK9_HUMAN | Dedicator of cytokinesis protein 9 OS=Homo sapiens OX=9606 GN=DOCK9 PE=1 SV=2                     | 0.03<br>156      | 4.14<br>635<br>3 | Yes |
| CAPG_HUMAN  | Macrophage-capping protein OS=Homo sapiens GN=CAPG PE=1 SV=2                                      | 0.02<br>498<br>5 | 4.14<br>151<br>3 | Yes |
| MON2_HUMAN  | Protein MON2 homolog OS=Homo sapiens GN=MON2 PE=1 SV=3                                            | 0.02<br>764<br>5 | 4.14<br>026      | Yes |
| NBAS_HUMAN  | Neuroblastoma-amplified sequence OS=Homo sapiens GN=NBAS PE=1 SV=2                                | 7.49<br>E-<br>06 | 4.13<br>128<br>1 | Yes |
| Z3H7B_HUMAN | Zinc finger CCCH domain-containing protein 7B OS=Homo sapiens GN=ZC3H7B PE=1 SV=1                 | 0.00<br>663<br>7 | 4.13<br>089<br>8 | Yes |
| MYRIP_HUMAN | Rab effector MyRIP OS=Homo sapiens GN=MYRIP PE=1 SV=2                                             | 0.00<br>019<br>2 | 4.10<br>859<br>5 | Yes |

|             |                                                                                        |                  |                  |     |
|-------------|----------------------------------------------------------------------------------------|------------------|------------------|-----|
| TFG_HUMAN   | Protein TFG OS=Homo sapiens GN=TFG PE=1 SV=2                                           | 0.01<br>472<br>1 | 4.10<br>496<br>6 | Yes |
| NDE1_HUMAN  | Nuclear distribution protein nudE homolog 1 OS=Homo sapiens OX=9606 GN=NDE1 PE=1 SV=3  | 0.00<br>338<br>4 | 4.08<br>154<br>1 | Yes |
| PUM1_HUMAN  | Pumilio homolog 1 OS=Homo sapiens GN=PUM1 PE=1 SV=3                                    | 0.00<br>608<br>1 | 4.06<br>746<br>4 | Yes |
| CLAP2_HUMAN | CLIP-associating protein 2 OS=Homo sapiens GN=CLASP2 PE=1 SV=2                         | 0.03<br>631<br>4 | 4.06<br>311<br>7 | Yes |
| CC186_HUMAN | Coiled-coil domain-containing protein 186 OS=Homo sapiens OX=9606 GN=CCDC186 PE=1 SV=2 | 0.00<br>085<br>1 | 4.05<br>434<br>6 | Yes |
| NLRP1_HUMAN | NACHT, LRR and PYD domains-containing protein 1 OS=Homo sapiens GN=NLRP1 PE=1 SV=1     | 0.04<br>269<br>4 | 4.05<br>415      | Yes |
| CYTSA_HUMAN | Cytospin-A OS=Homo sapiens GN=SPECC1L PE=1 SV=2                                        | 0.00<br>294<br>1 | 4.03<br>545<br>5 | Yes |
| TBCD5_HUMAN | TBC1 domain family member 5 OS=Homo sapiens OX=9606 GN=TBC1D5 PE=1 SV=1                | 0.00<br>439<br>5 | 4.02<br>914<br>4 | Yes |
| DOCK7_HUMAN | Dedicator of cytokinesis protein 7 OS=Homo sapiens GN=DOCK7 PE=1 SV=4                  | 0.03<br>369<br>6 | 4.02<br>723<br>1 | Yes |
| DIAP3_HUMAN | Protein diaphanous homolog 3 OS=Homo sapiens OX=9606 GN=DIAPH3 PE=1 SV=4               | 0.01<br>521<br>3 | 4.02<br>490<br>3 | Yes |
| EPN4_HUMAN  | Clathrin interactor 1 OS=Homo sapiens GN=CLINT1 PE=1 SV=1                              | 4.46<br>E-<br>06 | 4.02<br>444<br>5 | Yes |
| NEMO_HUMAN  | NF-kappa-B essential modulator OS=Homo sapiens GN=IKBKG PE=1 SV=2                      | 0.03<br>043<br>1 | 4.01<br>945      | Yes |
| COG6_HUMAN  | Conserved oligomeric Golgi complex subunit 6 OS=Homo sapiens OX=9606 GN=COG6 PE=1 SV=2 | 3.74<br>E-<br>05 | 4.01<br>417<br>3 | Yes |
| DDX58_HUMAN | Probable ATP-dependent RNA helicase DDX58 OS=Homo sapiens GN=DDX58 PE=1 SV=2           | 0.01<br>363<br>6 | 4.00<br>880<br>9 | Yes |
| SC24B_HUMAN | Protein transport protein Sec24B OS=Homo sapiens GN=SEC24B PE=1 SV=2                   | 0.00<br>165<br>7 | 3.99<br>195<br>5 | Yes |
| TENS1_HUMAN | Tensin-1 OS=Homo sapiens GN=TNS1 PE=1 SV=2                                             | 1.67<br>E-<br>07 | 3.98<br>163<br>2 | Yes |
| ERG_HUMAN   | Transcriptional regulator ERG OS=Homo sapiens GN=ERG PE=1 SV=2                         | 0.00<br>338<br>4 | 3.97<br>145<br>9 | Yes |
| PTN14_HUMAN | Tyrosine-protein phosphatase non-receptor type 14 OS=Homo sapiens GN=PTPN14 PE=1 SV=2  | 0.00<br>197<br>8 | 3.95<br>251<br>2 | Yes |

|             |                                                                                             |                  |                  |     |
|-------------|---------------------------------------------------------------------------------------------|------------------|------------------|-----|
| TRI65_HUMAN | Tripartite motif-containing protein 65 OS=Homo sapiens OX=9606 GN=TRIM65 PE=1 SV=3          | 0.00<br>113<br>4 | 3.94<br>471<br>3 | Yes |
| ROCK1_HUMAN | Rho-associated protein kinase 1 OS=Homo sapiens GN=ROCK1 PE=1 SV=1                          | 0.00<br>027<br>2 | 3.94<br>006<br>5 | Yes |
| RHG31_HUMAN | Rho GTPase-activating protein 31 OS=Homo sapiens GN=ARHGAP31 PE=1 SV=2                      | 0.00<br>010<br>5 | 3.93<br>827<br>4 | Yes |
| SVIL_HUMAN  | Supervillin OS=Homo sapiens GN=SVIL PE=1 SV=2                                               | 0.00<br>017<br>3 | 3.93<br>737<br>7 | Yes |
| TES_HUMAN   | Testin OS=Homo sapiens GN=TES PE=1 SV=1                                                     | 0.00<br>226<br>6 | 3.91<br>450<br>6 | Yes |
| TNR6B_HUMAN | Trinucleotide repeat-containing gene 6B protein OS=Homo sapiens OX=9606 GN=TNRC6B PE=1 SV=4 | 0.01<br>379<br>6 | 3.91<br>430<br>1 | Yes |
| SC24D_HUMAN | Protein transport protein Sec24D OS=Homo sapiens GN=SEC24D PE=1 SV=2                        | 0.00<br>044      | 3.91<br>192      | Yes |
| GAK_HUMAN   | Cyclin-G-associated kinase OS=Homo sapiens GN=GAK PE=1 SV=2                                 | 5.39<br>E-<br>05 | 3.90<br>456<br>5 | Yes |
| CT2NL_HUMAN | CTTNBP2 N-terminal-like protein OS=Homo sapiens GN=CTTNBP2NL PE=1 SV=2                      | 0.00<br>016<br>5 | 3.90<br>279<br>1 | Yes |
| OPTN_HUMAN  | Optineurin OS=Homo sapiens GN=OPTN PE=1 SV=2                                                | 0.02<br>711<br>7 | 3.89<br>350<br>5 | Yes |
| CXA1_HUMAN  | Gap junction alpha-1 protein OS=Homo sapiens GN=GJA1 PE=1 SV=2                              | 0.00<br>061<br>7 | 3.87<br>951<br>9 | Yes |
| COG5_HUMAN  | Conserved oligomeric Golgi complex subunit 5 OS=Homo sapiens OX=9606 GN=COG5 PE=1 SV=3      | 0.00<br>414<br>3 | 3.87<br>252<br>4 | Yes |
| EPS15_HUMAN | Epidermal growth factor receptor substrate 15 OS=Homo sapiens GN=EPS15 PE=1 SV=2            | 2.41<br>E-<br>06 | 3.86<br>731<br>1 | Yes |
| FGD5_HUMAN  | FYVE, RhoGEF and PH domain-containing protein 5 OS=Homo sapiens GN=FGD5 PE=1 SV=3           | 0.00<br>497<br>4 | 3.85<br>804<br>7 | Yes |
| SAMD9_HUMAN | Sterile alpha motif domain-containing protein 9 OS=Homo sapiens GN=SAMD9 PE=1 SV=1          | 0.01<br>025<br>8 | 3.85<br>323<br>7 | Yes |
| GGYF2_HUMAN | GRB10-interacting GYF protein 2 OS=Homo sapiens OX=9606 GN=GIGYF2 PE=1 SV=1                 | 0.00<br>030<br>2 | 3.84<br>419<br>2 | Yes |
| SC24A_HUMAN | Protein transport protein Sec24A OS=Homo sapiens GN=SEC24A PE=1 SV=2                        | 0.00<br>447<br>2 | 3.84<br>256<br>3 | Yes |
| SHOT1_HUMAN | Shootin-1 OS=Homo sapiens GN=SHTN1 PE=1 SV=4                                                | 9.23<br>E-<br>05 | 3.82<br>628<br>6 | Yes |



|             |                                                                                                          |          |          |     |
|-------------|----------------------------------------------------------------------------------------------------------|----------|----------|-----|
| NFXL1_HUMAN | NF-X1-type zinc finger protein NFXL1 OS=Homo sapiens OX=9606 GN=NFXL1 PE=1 SV=2                          | 0.000745 | 3.82291  | Yes |
| LPP_HUMAN   | Lipoma-preferred partner OS=Homo sapiens GN=LPP PE=1 SV=1                                                | 0.006495 | 3.793601 | Yes |
| RUFY1_HUMAN | RUN and FYVE domain-containing protein 1 OS=Homo sapiens GN=RUFY1 PE=1 SV=2                              | 0.046977 | 3.790989 | Yes |
| GRAP1_HUMAN | GRIP1-associated protein 1 OS=Homo sapiens OX=9606 GN=GRIPAP1 PE=1 SV=2                                  | 0.000517 | 3.790128 | Yes |
| AAK1_HUMAN  | AP2-associated protein kinase 1 OS=Homo sapiens GN=AAK1 PE=1 SV=3                                        | 0.000667 | 3.786288 | Yes |
| HAUS6_HUMAN | HAUS augmin-like complex subunit 6 OS=Homo sapiens OX=9606 GN=HAUS6 PE=1 SV=2                            | 0.00982  | 3.78388  | Yes |
| ANXA4_HUMAN | Annexin A4 OS=Homo sapiens OX=9606 GN=ANXA4 PE=1 SV=4                                                    | 0.01633  | 3.777109 | Yes |
| CLIP1_HUMAN | CAP-Gly domain-containing linker protein 1 OS=Homo sapiens GN=CLIP1 PE=1 SV=2                            | 7.97E-05 | 3.766488 | Yes |
| AKP13_HUMAN | A-kinase anchor protein 13 OS=Homo sapiens GN=AKAP13 PE=1 SV=2                                           | 0.003469 | 3.75198  | Yes |
| BIG3_HUMAN  | Brefeldin A-inhibited guanine nucleotide-exchange protein 3 OS=Homo sapiens OX=9606 GN=ARFGEF3 PE=1 SV=3 | 0.000419 | 3.751735 | Yes |
| PI4KA_HUMAN | Phosphatidylinositol 4-kinase alpha OS=Homo sapiens OX=9606 GN=PI4KA PE=1 SV=4                           | 0.009038 | 3.730952 | Yes |
| RBP2_HUMAN  | E3 SUMO-protein ligase RanBP2 OS=Homo sapiens GN=RANBP2 PE=1 SV=2                                        | 2.13E-05 | 3.729153 | Yes |
| FMNL3_HUMAN | Formin-like protein 3 OS=Homo sapiens OX=9606 GN=FMNL3 PE=1 SV=3                                         | 0.000778 | 3.716522 | Yes |
| DMD_HUMAN   | Dystrophin OS=Homo sapiens GN=DMD PE=1 SV=3                                                              | 0.011921 | 3.666427 | Yes |
| F1711_HUMAN | Protein FAM171A1 OS=Homo sapiens GN=FAM171A1 PE=1 SV=1                                                   | 0.001272 | 3.649762 | Yes |
| OSB10_HUMAN | Oxysterol-binding protein-related protein 10 OS=Homo sapiens GN=OSBPL10 PE=1 SV=2                        | 0.000216 | 3.64646  | Yes |
| ROCK2_HUMAN | Rho-associated protein kinase 2 OS=Homo sapiens GN=ROCK2 PE=1 SV=4                                       | 1.76E-05 | 3.645605 | Yes |
| ISG15_HUMAN | Ubiquitin-like protein ISG15 OS=Homo sapiens OX=9606 GN=ISG15 PE=1 SV=5                                  | 1.45E-05 | 3.63986  | Yes |

|             |                                                                                                                    |          |          |     |
|-------------|--------------------------------------------------------------------------------------------------------------------|----------|----------|-----|
| ARHGF_HUMAN | Rho guanine nucleotide exchange factor 15 OS=Homo sapiens GN=ARHGEF15 PE=1 SV=4                                    | 5.10E-05 | 3.637985 | Yes |
| GMIP_HUMAN  | GEM-interacting protein OS=Homo sapiens OX=9606 GN=GMIP PE=1 SV=2                                                  | 0.033301 | 3.618259 | Yes |
| FRYL_HUMAN  | Protein furry homolog-like OS=Homo sapiens GN=FRYL PE=1 SV=2                                                       | 4.80E-06 | 3.616302 | Yes |
| FBX7_HUMAN  | F-box only protein 7 OS=Homo sapiens GN=FBXO7 PE=1 SV=1                                                            | 0.008705 | 3.597793 | Yes |
| P3C2A_HUMAN | Phosphatidylinositol 4-phosphate 3-kinase C2 domain-containing subunit alpha OS=Homo sapiens GN=PIK3C2A PE=1 SV=2  | 0.002304 | 3.578114 | Yes |
| BCL10_HUMAN | B-cell lymphoma/leukemia 10 OS=Homo sapiens OX=9606 GN=BCL10 PE=1 SV=1                                             | 0.020235 | 3.563869 | Yes |
| RN214_HUMAN | RING finger protein 214 OS=Homo sapiens OX=9606 GN=RNF214 PE=1 SV=2                                                | 0.002001 | 3.543    | Yes |
| ACAP2_HUMAN | Arf-GAP with coiled-coil, ANK repeat and PH domain-containing protein 2 OS=Homo sapiens OX=9606 GN=ACAP2 PE=1 SV=3 | 0.031835 | 3.539467 | Yes |
| RB3GP_HUMAN | Rab3 GTPase-activating protein catalytic subunit OS=Homo sapiens GN=RAB3GAP1 PE=1 SV=3                             | 0.000224 | 3.534929 | Yes |
| IL6RB_HUMAN | Interleukin-6 receptor subunit beta OS=Homo sapiens GN=IL6ST PE=1 SV=2                                             | 0.000226 | 3.533177 | Yes |
| CRCM_HUMAN  | Colorectal mutant cancer protein OS=Homo sapiens GN=MCC PE=1 SV=2                                                  | 0.007882 | 3.515889 | Yes |
| RBGPR_HUMAN | Rab3 GTPase-activating protein non-catalytic subunit OS=Homo sapiens GN=RAB3GAP2 PE=1 SV=1                         | 0.007564 | 3.504744 | Yes |
| EH1L1_HUMAN | EH domain-binding protein 1-like protein 1 OS=Homo sapiens OX=9606 GN=EHBP1L1 PE=1 SV=2                            | 0.013046 | 3.502539 | Yes |
| PI3R4_HUMAN | Phosphoinositide 3-kinase regulatory subunit 4 OS=Homo sapiens GN=PIK3R4 PE=1 SV=3                                 | 0.000399 | 3.497652 | Yes |
| DNMBP_HUMAN | Dynamamin-binding protein OS=Homo sapiens GN=DNMBP PE=1 SV=1                                                       | 0.00408  | 3.465984 | Yes |
| RPB3_HUMAN  | DNA-directed RNA polymerase II subunit RPB3 OS=Homo sapiens GN=POLR2C PE=1 SV=2                                    | 6.63E-07 | 3.462692 | Yes |
| EXOC7_HUMAN | Exocyst complex component 7 OS=Homo sapiens OX=9606 GN=EXOC7 PE=1 SV=3                                             | 0.01564  | 3.458108 | Yes |
| VATE1_HUMAN | V-type proton ATPase subunit E 1 OS=Homo sapiens OX=9606 GN=ATP6V1E1 PE=1 SV=1                                     | 0.005853 | 3.44935  | Yes |

|             |                                                                                                             |          |          |     |
|-------------|-------------------------------------------------------------------------------------------------------------|----------|----------|-----|
| WDR11_HUMAN | WD repeat-containing protein 11 OS=Homo sapiens GN=WDR11 PE=1 SV=1                                          | 0.029311 | 3.444365 | Yes |
| MYO9B_HUMAN | Unconventional myosin-IXb OS=Homo sapiens GN=MYO9B PE=1 SV=3                                                | 2.22E-06 | 3.428754 | Yes |
| CLH2_HUMAN  | Clathrin heavy chain 2 OS=Homo sapiens OX=9606 GN=CLTCL1 PE=1 SV=2                                          | 0.001161 | 3.425347 | Yes |
| CSRP1_HUMAN | Cysteine and glycine-rich protein 1 OS=Homo sapiens GN=CSRP1 PE=1 SV=3                                      | 0.000149 | 3.424814 | Yes |
| YJ005_HUMAN | Uncharacterized protein FLJ45252 OS=Homo sapiens PE=2 SV=2                                                  | 1.87E-06 | 3.421554 | Yes |
| PLCG1_HUMAN | 1-phosphatidylinositol 4,5-bisphosphate phosphodiesterase gamma-1 OS=Homo sapiens GN=PLCG1 PE=1 SV=1        | 0.026335 | 3.409188 | Yes |
| PP1B_HUMAN  | Serine/threonine-protein phosphatase PP1-beta catalytic subunit OS=Homo sapiens OX=9606 GN=PPP1CB PE=1 SV=3 | 0.010009 | 3.407548 | Yes |
| RGPD3_HUMAN | RanBP2-like and GRIP domain-containing protein 3 OS=Homo sapiens GN=RGPD3 PE=3 SV=2                         | 0.005467 | 3.394228 | Yes |
| PANK4_HUMAN | Pantothenate kinase 4 OS=Homo sapiens GN=PANK4 PE=1 SV=1                                                    | 0.001057 | 3.386073 | Yes |
| GEPH_HUMAN  | Gephyrin OS=Homo sapiens GN=GPHN PE=1 SV=1                                                                  | 0.000312 | 3.381415 | Yes |
| APC1_HUMAN  | Anaphase-promoting complex subunit 1 OS=Homo sapiens GN=ANAPC1 PE=1 SV=1                                    | 0.003287 | 3.370231 | Yes |
| BICD2_HUMAN | Protein bicaudal D homolog 2 OS=Homo sapiens OX=9606 GN=BICD2 PE=1 SV=1                                     | 0.00019  | 3.346548 | Yes |
| CNOT3_HUMAN | CCR4-NOT transcription complex subunit 3 OS=Homo sapiens GN=CNOT3 PE=1 SV=1                                 | 0.0082   | 3.346129 | Yes |
| FKB15_HUMAN | FK506-binding protein 15 OS=Homo sapiens GN=FKBP15 PE=1 SV=2                                                | 6.53E-05 | 3.345885 | Yes |
| HS74L_HUMAN | Heat shock 70 kDa protein 4L OS=Homo sapiens OX=9606 GN=HSPA4L PE=1 SV=3                                    | 0.027529 | 3.344902 | Yes |
| K1671_HUMAN | Uncharacterized protein KIAA1671 OS=Homo sapiens OX=9606 GN=KIAA1671 PE=1 SV=2                              | 0.012663 | 3.329962 | Yes |
| TSC2_HUMAN  | Tuberin OS=Homo sapiens OX=9606 GN=TSC2 PE=1 SV=2                                                           | 0.006313 | 3.323087 | Yes |
| ARFG1_HUMAN | ADP-ribosylation factor GTPase-activating protein 1 OS=Homo sapiens GN=ARFGAP1 PE=1 SV=2                    | 0.001901 | 3.316558 | Yes |

|             |                                                                                                                  |                  |                  |     |
|-------------|------------------------------------------------------------------------------------------------------------------|------------------|------------------|-----|
| HUWE1_HUMAN | E3 ubiquitin-protein ligase HUWE1 OS=Homo sapiens GN=HUWE1 PE=1 SV=3                                             | 5.90<br>E-06     | 3.31<br>277<br>7 | Yes |
| PSMD5_HUMAN | 26S proteasome non-ATPase regulatory subunit 5 OS=Homo sapiens GN=PSMD5 PE=1 SV=3                                | 2.74<br>E-05     | 3.31<br>193<br>7 | Yes |
| ANR40_HUMAN | Ankyrin repeat domain-containing protein 40 OS=Homo sapiens GN=ANKRD40 PE=1 SV=2                                 | 0.00<br>131<br>2 | 3.30<br>423<br>6 | Yes |
| BAG3_HUMAN  | BAG family molecular chaperone regulator 3 OS=Homo sapiens GN=BAG3 PE=1 SV=3                                     | 0.01<br>606<br>5 | 3.28<br>591<br>3 | Yes |
| CND1_HUMAN  | Condensin complex subunit 1 OS=Homo sapiens GN=NCAPD2 PE=1 SV=3                                                  | 0.00<br>519<br>6 | 3.28<br>043<br>6 | Yes |
| LRCH3_HUMAN | Leucine-rich repeat and calponin homology domain-containing protein 3 OS=Homo sapiens OX=9606 GN=LRCH3 PE=1 SV=2 | 0.00<br>445<br>9 | 3.27<br>383<br>6 | Yes |
| UBA6_HUMAN  | Ubiquitin-like modifier-activating enzyme 6 OS=Homo sapiens GN=UBA6 PE=1 SV=1                                    | 0.00<br>429<br>3 | 3.26<br>589<br>8 | Yes |
| TRI47_HUMAN | Tripartite motif-containing protein 47 OS=Homo sapiens GN=TRIM47 PE=1 SV=2                                       | 0.00<br>258<br>5 | 3.25<br>353<br>5 | Yes |
| RFTN1_HUMAN | Raftlin OS=Homo sapiens GN=RFTN1 PE=1 SV=4                                                                       | 0.00<br>810<br>2 | 3.24<br>986<br>9 | Yes |
| ANLN_HUMAN  | Anillin OS=Homo sapiens OX=9606 GN=ANLN PE=1 SV=2                                                                | 0.01<br>226<br>3 | 3.24<br>663<br>3 | Yes |
| PTN11_HUMAN | Tyrosine-protein phosphatase non-receptor type 11 OS=Homo sapiens GN=PTPN11 PE=1 SV=2                            | 0.00<br>667<br>9 | 3.24<br>643<br>3 | Yes |
| GEM15_HUMAN | Gem-associated protein 5 OS=Homo sapiens GN=GEMIN5 PE=1 SV=3                                                     | 0.00<br>023<br>7 | 3.24<br>381<br>2 | Yes |
| OSBP1_HUMAN | Oxysterol-binding protein 1 OS=Homo sapiens GN=OSBP PE=1 SV=1                                                    | 0.00<br>201<br>1 | 3.24<br>357<br>6 | Yes |
| ANKL2_HUMAN | Ankyrin repeat and LEM domain-containing protein 2 OS=Homo sapiens OX=9606 GN=ANKLE2 PE=1 SV=4                   | 0.04<br>071<br>2 | 3.24<br>032<br>6 | Yes |
| PALMD_HUMAN | Palmdelphin OS=Homo sapiens GN=PALMD PE=1 SV=1                                                                   | 0.00<br>561<br>5 | 3.23<br>970<br>1 | Yes |
| SC23A_HUMAN | Protein transport protein Sec23A OS=Homo sapiens GN=SEC23A PE=1 SV=2                                             | 0.00<br>294<br>1 | 3.23<br>747<br>3 | Yes |
| SCRIB_HUMAN | Protein scribble homolog OS=Homo sapiens GN=SCRIB PE=1 SV=4                                                      | 0.00<br>083<br>7 | 3.22<br>914<br>4 | Yes |
| RAB8B_HUMAN | Ras-related protein Rab-8B OS=Homo sapiens GN=RAB8B PE=1 SV=2                                                    | 0.00<br>774<br>6 | 3.22<br>793<br>4 | Yes |

|             |                                                                                                       |                  |                  |     |
|-------------|-------------------------------------------------------------------------------------------------------|------------------|------------------|-----|
| HTR5B_HUMAN | HEAT repeat-containing protein 5B OS=Homo sapiens GN=HEATR5B PE=1 SV=2                                | 0.00<br>026<br>5 | 3.22<br>383<br>1 | Yes |
| RB6I2_HUMAN | ELKS/Rab6-interacting/CAST family member 1 OS=Homo sapiens GN=ERC1 PE=1 SV=1                          | 3.38<br>E-<br>10 | 3.22<br>079<br>5 | Yes |
| CKAP5_HUMAN | Cytoskeleton-associated protein 5 OS=Homo sapiens GN=CKAP5 PE=1 SV=3                                  | 2.03<br>E-<br>05 | 3.21<br>617<br>3 | Yes |
| HERC4_HUMAN | Probable E3 ubiquitin-protein ligase HERC4 OS=Homo sapiens GN=HERC4 PE=1 SV=1                         | 0.02<br>797<br>8 | 3.20<br>704<br>8 | Yes |
| SIIL3_HUMAN | Signal-induced proliferation-associated 1-like protein 3 OS=Homo sapiens OX=9606 GN=SIPA1L3 PE=1 SV=3 | 0.01<br>733<br>3 | 3.20<br>024<br>7 | Yes |
| ARHG1_HUMAN | Rho guanine nucleotide exchange factor 1 OS=Homo sapiens GN=ARHGEF1 PE=1 SV=2                         | 7.37<br>E-<br>05 | 3.19<br>638<br>6 | Yes |
| DAB2_HUMAN  | Disabled homolog 2 OS=Homo sapiens GN=DAB2 PE=1 SV=3                                                  | 0.02<br>136<br>3 | 3.19<br>492<br>3 | Yes |
| BAG5_HUMAN  | BAG family molecular chaperone regulator 5 OS=Homo sapiens OX=9606 GN=BAG5 PE=1 SV=1                  | 0.00<br>309<br>5 | 3.17<br>396<br>5 | Yes |
| PEX14_HUMAN | Peroxisomal membrane protein PEX14 OS=Homo sapiens OX=9606 GN=PEX14 PE=1 SV=1                         | 0.01<br>196      | 3.16<br>965      | Yes |
| LIMD1_HUMAN | LIM domain-containing protein 1 OS=Homo sapiens OX=9606 GN=LIMD1 PE=1 SV=1                            | 0.02<br>647<br>9 | 3.16<br>771<br>5 | Yes |
| ROBO4_HUMAN | Roundabout homolog 4 OS=Homo sapiens OX=9606 GN=ROBO4 PE=1 SV=1                                       | 0.00<br>106<br>7 | 3.16<br>695      | Yes |
| SAMH1_HUMAN | Deoxynucleoside triphosphate triphosphohydrolase SAMHD1 OS=Homo sapiens GN=SAMHD1 PE=1 SV=2           | 0.00<br>427<br>7 | 3.16<br>583<br>8 | Yes |
| RABE2_HUMAN | Rab GTPase-binding effector protein 2 OS=Homo sapiens OX=9606 GN=RABEP2 PE=1 SV=2                     | 0.00<br>376<br>6 | 3.15<br>259<br>3 | Yes |
| TB182_HUMAN | 182 kDa tankyrase-1-binding protein OS=Homo sapiens GN=TNKS1BP1 PE=1 SV=4                             | 5.99<br>E-<br>09 | 3.14<br>195<br>2 | Yes |
| CBL_HUMAN   | E3 ubiquitin-protein ligase CBL OS=Homo sapiens GN=CBL PE=1 SV=2                                      | 0.01<br>677<br>7 | 3.13<br>317<br>5 | Yes |
| SNX18_HUMAN | Sorting nexin-18 OS=Homo sapiens GN=SNX18 PE=1 SV=2                                                   | 0.00<br>957<br>8 | 3.11<br>181<br>6 | Yes |
| CUL3_HUMAN  | Cullin-3 OS=Homo sapiens OX=9606 GN=CUL3 PE=1 SV=2                                                    | 0.00<br>033<br>9 | 3.09<br>907      | Yes |
| CAMP1_HUMAN | Calmodulin-regulated spectrin-associated protein 1 OS=Homo sapiens GN=CAMSAP1 PE=1 SV=2               | 0.02<br>448      | 3.09<br>896<br>6 | Yes |

|              |                                                                                                         |                  |                  |     |
|--------------|---------------------------------------------------------------------------------------------------------|------------------|------------------|-----|
| SNTB2_HUMAN  | Beta-2-syntrophin OS=Homo sapiens GN=SNTB2 PE=1 SV=1                                                    | 4.88<br>E-07     | 3.09<br>564<br>2 | Yes |
| NUP88_HUMAN  | Nuclear pore complex protein Nup88 OS=Homo sapiens GN=NUP88 PE=1 SV=2                                   | 0.01<br>848<br>2 | 3.09<br>453<br>2 | Yes |
| ZCCHV_HUMAN  | Zinc finger CCCH-type antiviral protein 1 OS=Homo sapiens GN=ZC3HAV1 PE=1 SV=3                          | 1.38<br>E-10     | 3.09<br>053      | Yes |
| YAP1_HUMAN   | Transcriptional coactivator YAP1 OS=Homo sapiens OX=9606 GN=YAP1 PE=1 SV=2                              | 0.00<br>991<br>6 | 3.08<br>387<br>3 | Yes |
| MYPT1_HUMAN  | Protein phosphatase 1 regulatory subunit 12A OS=Homo sapiens GN=PPP1R12A PE=1 SV=1                      | 2.65<br>E-05     | 3.07<br>677<br>4 | Yes |
| FRMD6_HUMAN  | FERM domain-containing protein 6 OS=Homo sapiens GN=FRMD6 PE=1 SV=1                                     | 0.00<br>783<br>8 | 3.07<br>565<br>7 | Yes |
| WDR44_HUMAN  | WD repeat-containing protein 44 OS=Homo sapiens OX=9606 GN=WDR44 PE=1 SV=1                              | 0.00<br>080<br>3 | 3.07<br>360<br>4 | Yes |
| REPS1_HUMAN  | RalBP1-associated Eps domain-containing protein 1 OS=Homo sapiens GN=REPS1 PE=1 SV=3                    | 0.00<br>098<br>2 | 3.06<br>893<br>8 | Yes |
| GTPB1_HUMAN  | GTP-binding protein 1 OS=Homo sapiens OX=9606 GN=GTPBP1 PE=1 SV=3                                       | 0.02<br>140<br>8 | 3.05<br>053<br>6 | Yes |
| CD2AP_HUMAN  | CD2-associated protein OS=Homo sapiens GN=CD2AP PE=1 SV=1                                               | 0.00<br>285<br>8 | 3.05<br>049<br>1 | Yes |
| TRIP6_HUMAN  | Thyroid receptor-interacting protein 6 OS=Homo sapiens GN=TRIP6 PE=1 SV=3                               | 0.00<br>014<br>9 | 3.04<br>565<br>9 | Yes |
| SBP2L_HUMAN  | Selenocysteine insertion sequence-binding protein 2-like OS=Homo sapiens OX=9606 GN=SECISBP2L PE=1 SV=3 | 0.00<br>153<br>2 | 3.04<br>515<br>8 | Yes |
| MICA2_HUMAN  | [F-actin]-monooxygenase MICAL2 OS=Homo sapiens OX=9606 GN=MICAL2 PE=1 SV=1                              | 0.00<br>553<br>3 | 3.03<br>996<br>5 | Yes |
| ANKH1_HUMAN  | Ankyrin repeat and KH domain-containing protein 1 OS=Homo sapiens GN=ANKHD1 PE=1 SV=1                   | 0.00<br>871<br>6 | 3.03<br>920<br>8 | Yes |
| SNP23_HUMAN  | Synaptosomal-associated protein 23 OS=Homo sapiens GN=SNAP23 PE=1 SV=1                                  | 0.00<br>090<br>9 | 3.00<br>629<br>3 | Yes |
| TAB1_HUMAN   | TGF-beta-activated kinase 1 and MAP3K7-binding protein 1 OS=Homo sapiens OX=9606 GN=TAB1 PE=1 SV=1      | 0.02<br>224<br>2 | 2.99<br>408<br>7 | Yes |
| SQSTM1_HUMAN | Sequestosome-1 OS=Homo sapiens GN=SQSTM1 PE=1 SV=1                                                      | 0.00<br>806<br>6 | 2.98<br>982<br>2 | Yes |
| BABAM1_HUMAN | BRISC and BRCA1-A complex member 1 OS=Homo sapiens OX=9606 GN=BABAM1 PE=1 SV=1                          | 0.00<br>218<br>5 | 2.98<br>499<br>4 | Yes |

|             |                                                                                       |          |          |     |
|-------------|---------------------------------------------------------------------------------------|----------|----------|-----|
| GCP2_HUMAN  | Gamma-tubulin complex component 2 OS=Homo sapiens OX=9606 GN=TUBGCP2 PE=1 SV=2        | 0.02002  | 2.966543 | Yes |
| STX7_HUMAN  | Syntaxin-7 OS=Homo sapiens GN=STX7 PE=1 SV=4                                          | 1.02E-05 | 2.966322 | Yes |
| TBC9B_HUMAN | TBC1 domain family member 9B OS=Homo sapiens OX=9606 GN=TBC1D9B PE=1 SV=3             | 0.040155 | 2.958329 | Yes |
| SYNJ1_HUMAN | Synaptojanin-1 OS=Homo sapiens OX=9606 GN=SYNJ1 PE=1 SV=2                             | 0.020218 | 2.955187 | Yes |
| BIRC6_HUMAN | Baculoviral IAP repeat-containing protein 6 OS=Homo sapiens GN=BIRC6 PE=1 SV=2        | 8.58E-09 | 2.951409 | Yes |
| AFAP1_HUMAN | Actin filament-associated protein 1 OS=Homo sapiens GN=AFAP1 PE=1 SV=2                | 0.03023  | 2.946184 | Yes |
| SNX9_HUMAN  | Sorting nexin-9 OS=Homo sapiens GN=SNX9 PE=1 SV=1                                     | 0.000222 | 2.944635 | Yes |
| BORG5_HUMAN | Cdc42 effector protein 1 OS=Homo sapiens OX=9606 GN=CDC42EP1 PE=1 SV=1                | 0.004745 | 2.937356 | Yes |
| MRCKB_HUMAN | Serine/threonine-protein kinase MRCK beta OS=Homo sapiens GN=CDC42BPB PE=1 SV=2       | 8.79E-05 | 2.933857 | Yes |
| FAF2_HUMAN  | FAS-associated factor 2 OS=Homo sapiens GN=FAF2 PE=1 SV=2                             | 0.035101 | 2.929318 | Yes |
| PAXIL_HUMAN | Paxillin OS=Homo sapiens GN=PXN PE=1 SV=3                                             | 0.002832 | 2.924761 | Yes |
| PAWR_HUMAN  | PRKC apoptosis WT1 regulator protein OS=Homo sapiens GN=PAWR PE=1 SV=1                | 8.48E-05 | 2.908473 | Yes |
| VP33B_HUMAN | Vacuolar protein sorting-associated protein 33B OS=Homo sapiens GN=VPS33B PE=1 SV=2   | 0.003654 | 2.900438 | Yes |
| PPR18_HUMAN | Phostensin OS=Homo sapiens GN=PPP1R18 PE=1 SV=1                                       | 4.99E-05 | 2.89823  | Yes |
| FND3B_HUMAN | Fibronectin type III domain-containing protein 3B OS=Homo sapiens GN=FNDC3B PE=1 SV=2 | 0.012244 | 2.896369 | Yes |
| DPYL3_HUMAN | Dihydropyrimidinase-related protein 3 OS=Homo sapiens GN=DPYSL3 PE=1 SV=1             | 7.09E-05 | 2.884375 | Yes |
| TRIO_HUMAN  | Triple functional domain protein OS=Homo sapiens GN=TRIO PE=1 SV=2                    | 0.010616 | 2.884124 | Yes |
| TAP1_HUMAN  | Antigen peptide transporter 1 OS=Homo sapiens OX=9606 GN=TAP1 PE=1 SV=2               | 0.002748 | 2.878724 | Yes |

|             |                                                                                                           |                  |                  |     |
|-------------|-----------------------------------------------------------------------------------------------------------|------------------|------------------|-----|
| DSRAD_HUMAN | Double-stranded RNA-specific adenosine deaminase OS=Homo sapiens GN=ADAR PE=1 SV=4                        | 0.00<br>132<br>6 | 2.86<br>610<br>6 | Yes |
| SHC1_HUMAN  | SHC-transforming protein 1 OS=Homo sapiens GN=SHC1 PE=1 SV=4                                              | 0.00<br>492      | 2.85<br>036<br>6 | Yes |
| KIF1A_HUMAN | Kinesin-like protein KIF1A OS=Homo sapiens OX=9606 GN=KIF1A PE=1 SV=2                                     | 0.01<br>854<br>1 | 2.84<br>280<br>2 | Yes |
| ECM29_HUMAN | Proteasome-associated protein ECM29 homolog OS=Homo sapiens GN=ECM29 PE=1 SV=2                            | 0.00<br>673<br>2 | 2.82<br>988<br>6 | Yes |
| OSBL3_HUMAN | Oxysterol-binding protein-related protein 3 OS=Homo sapiens GN=OSBPL3 PE=1 SV=1                           | 8.99<br>E-<br>07 | 2.82<br>970<br>7 | Yes |
| CNN3_HUMAN  | Calponin-3 OS=Homo sapiens GN=CNN3 PE=1 SV=1                                                              | 0.01<br>883<br>7 | 2.82<br>497<br>7 | Yes |
| TANK_HUMAN  | TRAF family member-associated NF-kappa-B activator OS=Homo sapiens OX=9606 GN=TANK PE=1 SV=2              | 0.01<br>732<br>8 | 2.82<br>014<br>1 | Yes |
| MYO10_HUMAN | Unconventional myosin-X OS=Homo sapiens OX=9606 GN=MYO10 PE=1 SV=3                                        | 0.00<br>139<br>6 | 2.81<br>791<br>3 | Yes |
| PP4R1_HUMAN | Serine/threonine-protein phosphatase 4 regulatory subunit 1 OS=Homo sapiens OX=9606 GN=PPP4R1 PE=1 SV=1   | 0.00<br>084<br>3 | 2.81<br>052<br>5 | Yes |
| PHLB1_HUMAN | Pleckstrin homology-like domain family B member 1 OS=Homo sapiens GN=PHLDB1 PE=1 SV=1                     | 0.00<br>049<br>7 | 2.80<br>966<br>2 | Yes |
| STAT2_HUMAN | Signal transducer and activator of transcription 2 OS=Homo sapiens GN=STAT2 PE=1 SV=1                     | 0.00<br>751<br>6 | 2.80<br>272<br>3 | Yes |
| STXB3_HUMAN | Syntaxin-binding protein 3 OS=Homo sapiens GN=STXBP3 PE=1 SV=2                                            | 0.04<br>450<br>8 | 2.79<br>752<br>4 | Yes |
| LMO7_HUMAN  | LIM domain only protein 7 OS=Homo sapiens GN=LMO7 PE=1 SV=3                                               | 0.02<br>634<br>6 | 2.79<br>691<br>4 | Yes |
| ASCC3_HUMAN | Activating signal cointegrator 1 complex subunit 3 OS=Homo sapiens GN=ASCC3 PE=1 SV=3                     | 5.59<br>E-<br>06 | 2.79<br>425<br>2 | Yes |
| RT22_HUMAN  | 28S ribosomal protein S22, mitochondrial OS=Homo sapiens GN=MRPS22 PE=1 SV=1                              | 0.01<br>888<br>8 | 2.79<br>365<br>9 | Yes |
| VTI1B_HUMAN | Vesicle transport through interaction with t-SNAREs homolog 1B OS=Homo sapiens OX=9606 GN=VTI1B PE=1 SV=3 | 0.03<br>619<br>7 | 2.78<br>989<br>8 | Yes |
| ARHG2_HUMAN | Rho guanine nucleotide exchange factor 2 OS=Homo sapiens GN=ARHGEF2 PE=1 SV=4                             | 1.23<br>E-<br>05 | 2.78<br>964<br>9 | Yes |
| RC3H1_HUMAN | Roquin-1 OS=Homo sapiens OX=9606 GN=RC3H1 PE=1 SV=1                                                       | 0.00<br>146<br>4 | 2.78<br>88       | Yes |



|             |                                                                                                                   |                  |                  |     |
|-------------|-------------------------------------------------------------------------------------------------------------------|------------------|------------------|-----|
| E2AK4_HUMAN | eIF-2-alpha kinase GCN2 OS=Homo sapiens OX=9606 GN=EIF2AK4 PE=1 SV=3                                              | 0.00<br>485<br>2 | 2.77<br>103<br>2 | Yes |
| TARA_HUMAN  | TRIO and F-actin-binding protein OS=Homo sapiens GN=TRIOBP PE=1 SV=3                                              | 0.00<br>465<br>6 | 2.77<br>087<br>3 | Yes |
| BET1_HUMAN  | BET1 homolog OS=Homo sapiens OX=9606 GN=BET1 PE=1 SV=1                                                            | 0.01<br>550<br>1 | 2.74<br>608<br>6 | Yes |
| SH2D3_HUMAN | SH2 domain-containing protein 3C OS=Homo sapiens OX=9606 GN=SH2D3C PE=1 SV=1                                      | 0.00<br>776<br>5 | 2.74<br>560<br>2 | Yes |
| PHLB2_HUMAN | Pleckstrin homology-like domain family B member 2 OS=Homo sapiens OX=9606 GN=PHLDB2 PE=1 SV=2                     | 0.03<br>868      | 2.74<br>335<br>7 | Yes |
| JUPI2_HUMAN | Jupiter microtubule associated homolog 2 OS=Homo sapiens OX=9606 GN=JPT2 PE=1 SV=1                                | 0.00<br>034<br>5 | 2.73<br>182<br>5 | Yes |
| ARFG2_HUMAN | ADP-ribosylation factor GTPase-activating protein 2 OS=Homo sapiens GN=ARFGAP2 PE=1 SV=1                          | 0.00<br>029<br>1 | 2.71<br>701<br>9 | Yes |
| CARD6_HUMAN | Caspase recruitment domain-containing protein 6 OS=Homo sapiens OX=9606 GN=CARD6 PE=1 SV=2                        | 0.01<br>126<br>4 | 2.70<br>977<br>6 | Yes |
| SPAG5_HUMAN | Sperm-associated antigen 5 OS=Homo sapiens GN=SPAG5 PE=1 SV=2                                                     | 0.03<br>677<br>4 | 2.69<br>722      | Yes |
| ZO1_HUMAN   | Tight junction protein ZO-1 OS=Homo sapiens GN=TJP1 PE=1 SV=3                                                     | 4.63<br>E-<br>05 | 2.69<br>598<br>1 | Yes |
| TBL2_HUMAN  | Transducin beta-like protein 2 OS=Homo sapiens GN=TBL2 PE=1 SV=1                                                  | 0.00<br>129<br>6 | 2.69<br>163<br>9 | Yes |
| ATX2L_HUMAN | Ataxin-2-like protein OS=Homo sapiens GN=ATXN2L PE=1 SV=2                                                         | 2.82<br>E-<br>05 | 2.68<br>601<br>6 | Yes |
| KKCC2_HUMAN | Calcium/calmodulin-dependent protein kinase kinase 2 OS=Homo sapiens OX=9606 GN=CAMKK2 PE=1 SV=2                  | 0.01<br>644<br>1 | 2.68<br>530<br>2 | Yes |
| OGT1_HUMAN  | UDP-N-acetylglucosamine--peptide N-acetylglucosaminyltransferase 110 kDa subunit OS=Homo sapiens GN=OGT PE=1 SV=3 | 0.01<br>007<br>1 | 2.66<br>684<br>4 | Yes |
| AMPD2_HUMAN | AMP deaminase 2 OS=Homo sapiens GN=AMPD2 PE=1 SV=2                                                                | 8.88<br>E-<br>05 | 2.66<br>432      | Yes |
| ANXA7_HUMAN | Annexin A7 OS=Homo sapiens GN=ANXA7 PE=1 SV=3                                                                     | 5.49<br>E-<br>06 | 2.66<br>285<br>1 | Yes |
| AKAP2_HUMAN | A-kinase anchor protein 2 OS=Homo sapiens GN=AKAP2 PE=1 SV=3                                                      | 2.55<br>E-<br>06 | 2.66<br>117<br>7 | Yes |
| E2AK2_HUMAN | Interferon-induced, double-stranded RNA-activated protein kinase OS=Homo sapiens GN=EIF2AK2 PE=1 SV=2             | 0.00<br>035<br>4 | 2.65<br>695<br>8 | Yes |

|              |                                                                                                                |                  |                  |     |
|--------------|----------------------------------------------------------------------------------------------------------------|------------------|------------------|-----|
| SPF45_HUMAN  | Splicing factor 45 OS=Homo sapiens OX=9606 GN=RBM17 PE=1 SV=1                                                  | 0.01<br>666<br>4 | 2.65<br>594<br>2 | Yes |
| GPDM_HUMAN   | Glycerol-3-phosphate dehydrogenase, mitochondrial OS=Homo sapiens GN=GPD2 PE=1 SV=3                            | 0.01<br>354<br>4 | 2.65<br>283<br>5 | Yes |
| FKBP1A_HUMAN | Peptidyl-prolyl cis-trans isomerase FKBP1A OS=Homo sapiens GN=FKBP1A PE=1 SV=2                                 | 0.00<br>012<br>3 | 2.65<br>252<br>9 | Yes |
| SC16A_HUMAN  | Protein transport protein Sec16A OS=Homo sapiens GN=SEC16A PE=1 SV=3                                           | 9.28<br>E-<br>05 | 2.64<br>689<br>1 | Yes |
| KCMF1_HUMAN  | E3 ubiquitin-protein ligase KCMF1 OS=Homo sapiens OX=9606 GN=KCMF1 PE=1 SV=2                                   | 0.03<br>155<br>8 | 2.64<br>534<br>2 | Yes |
| TM1L2_HUMAN  | TOM1-like protein 2 OS=Homo sapiens OX=9606 GN=TOM1L2 PE=1 SV=1                                                | 0.01<br>414<br>7 | 2.63<br>964<br>2 | Yes |
| SYNPO_HUMAN  | Synaptopodin OS=Homo sapiens GN=SYNPO PE=1 SV=2                                                                | 3.08<br>E-<br>05 | 2.63<br>845<br>9 | Yes |
| LASP1_HUMAN  | LIM and SH3 domain protein 1 OS=Homo sapiens GN=LASP1 PE=1 SV=2                                                | 0.00<br>072<br>7 | 2.61<br>602      | Yes |
| RAPH1_HUMAN  | Ras-associated and pleckstrin homology domains-containing protein 1 OS=Homo sapiens OX=9606 GN=RAPH1 PE=1 SV=3 | 0.03<br>340<br>6 | 2.61<br>393<br>8 | Yes |
| TRXR1_HUMAN  | Thioredoxin reductase 1, cytoplasmic OS=Homo sapiens OX=9606 GN=TXNRD1 PE=1 SV=3                               | 0.03<br>475<br>3 | 2.61<br>205<br>7 | Yes |
| RHG29_HUMAN  | Rho GTPase-activating protein 29 OS=Homo sapiens GN=ARHGAP29 PE=1 SV=2                                         | 0.00<br>047<br>3 | 2.60<br>548      | Yes |
| CAMP2_HUMAN  | Calmodulin-regulated spectrin-associated protein 2 OS=Homo sapiens GN=CAMSAP2 PE=1 SV=3                        | 0.00<br>309      | 2.60<br>524<br>4 | Yes |
| JAK1_HUMAN   | Tyrosine-protein kinase JAK1 OS=Homo sapiens GN=JAK1 PE=1 SV=2                                                 | 7.58<br>E-<br>05 | 2.60<br>095<br>5 | Yes |
| PUR6_HUMAN   | Multifunctional protein ADE2 OS=Homo sapiens GN=PAICS PE=1 SV=3                                                | 6.49<br>E-<br>05 | 2.58<br>781      | Yes |
| SKIV2_HUMAN  | Helicase SKI2W OS=Homo sapiens GN=SKIV2L PE=1 SV=3                                                             | 0.01<br>274<br>3 | 2.57<br>877<br>9 | Yes |
| STRN4_HUMAN  | Striatin-4 OS=Homo sapiens GN=STRN4 PE=1 SV=2                                                                  | 0.00<br>064<br>4 | 2.57<br>664<br>2 | Yes |
| HBS1L_HUMAN  | HBS1-like protein OS=Homo sapiens GN=HBS1L PE=1 SV=1                                                           | 0.00<br>119<br>9 | 2.55<br>604<br>3 | Yes |
| ZYX_HUMAN    | Zyxin OS=Homo sapiens GN=ZYX PE=1 SV=1                                                                         | 1.01<br>E-<br>05 | 2.55<br>277<br>3 | Yes |

|              |                                                                                                                 |                  |                  |     |
|--------------|-----------------------------------------------------------------------------------------------------------------|------------------|------------------|-----|
| LSM12_HUMAN  | Protein LSM12 homolog OS=Homo sapiens OX=9606 GN=LSM12 PE=1 SV=2                                                | 6.30<br>E-05     | 2.54<br>255      | Yes |
| AASD1_HUMAN  | Alanyl-tRNA editing protein Aarsd1 OS=Homo sapiens GN=AARSD1 PE=1 SV=2                                          | 0.00<br>052<br>7 | 2.53<br>139<br>7 | Yes |
| SHAN3_HUMAN  | SH3 and multiple ankyrin repeat domains protein 3 OS=Homo sapiens GN=SHANK3 PE=1 SV=3                           | 0.00<br>108<br>7 | 2.52<br>427<br>3 | Yes |
| SUN1_HUMAN   | SUN domain-containing protein 1 OS=Homo sapiens GN=SUN1 PE=1 SV=3                                               | 0.01<br>186<br>9 | 2.52<br>346<br>4 | Yes |
| IST1_HUMAN   | IST1 homolog OS=Homo sapiens GN=IST1 PE=1 SV=1                                                                  | 0.04<br>528      | 2.52<br>025<br>7 | Yes |
| GRB14_HUMAN  | Growth factor receptor-bound protein 14 OS=Homo sapiens OX=9606 GN=GRB14 PE=1 SV=2                              | 0.00<br>5        | 2.51<br>888<br>2 | Yes |
| MICA1_HUMAN  | [F-actin]-monooxygenase MICAL1 OS=Homo sapiens OX=9606 GN=MICAL1 PE=1 SV=2                                      | 0.02<br>098<br>5 | 2.51<br>446<br>4 | Yes |
| UBP4_HUMAN   | Ubiquitin carboxyl-terminal hydrolase 4 OS=Homo sapiens GN=USP4 PE=1 SV=3                                       | 0.04<br>370<br>3 | 2.51<br>292<br>5 | Yes |
| ANR28_HUMAN  | Serine/threonine-protein phosphatase 6 regulatory ankyrin repeat subunit A OS=Homo sapiens GN=ANKRD28 PE=1 SV=5 | 0.03<br>507<br>3 | 2.50<br>556<br>9 | Yes |
| CTNB1_HUMAN  | Catenin beta-1 OS=Homo sapiens GN=CTNNB1 PE=1 SV=1                                                              | 2.03<br>E-05     | 2.50<br>418<br>3 | Yes |
| MRCK_A_HUMAN | Serine/threonine-protein kinase MRCK alpha OS=Homo sapiens GN=CDC42BPA PE=1 SV=1                                | 0.01<br>993<br>3 | 2.50<br>129<br>9 | Yes |
| EIF3H_HUMAN  | Eukaryotic translation initiation factor 3 subunit H OS=Homo sapiens GN=EIF3H PE=1 SV=1                         | 0.01<br>246<br>4 | 2.49<br>635      | Yes |
| APOL2_HUMAN  | Apolipoprotein L2 OS=Homo sapiens GN=APOL2 PE=1 SV=1                                                            | 0.00<br>044<br>9 | 2.49<br>317<br>8 | Yes |
| CND2_HUMAN   | Condensin complex subunit 2 OS=Homo sapiens GN=NCAPH PE=1 SV=3                                                  | 0.00<br>078<br>4 | 2.48<br>810<br>9 | Yes |
| KIF13B_HUMAN | Kinesin-like protein KIF13B OS=Homo sapiens GN=KIF13B PE=1 SV=2                                                 | 0.01<br>613<br>7 | 2.47<br>882<br>6 | Yes |
| ANX11_HUMAN  | Annexin A11 OS=Homo sapiens GN=ANXA11 PE=1 SV=1                                                                 | 3.33<br>E-05     | 2.47<br>692<br>4 | Yes |
| HMOX2_HUMAN  | Heme oxygenase 2 OS=Homo sapiens GN=HMOX2 PE=1 SV=2                                                             | 0.00<br>024<br>8 | 2.47<br>601<br>2 | Yes |
| M4K5_HUMAN   | Mitogen-activated protein kinase kinase kinase 5 OS=Homo sapiens OX=9606 GN=MAP4K5 PE=1 SV=2                    | 7.74<br>E-06     | 2.47<br>121<br>2 | Yes |

|              |                                                                                                    |          |          |     |
|--------------|----------------------------------------------------------------------------------------------------|----------|----------|-----|
| FHOD1_HUMAN  | FH1/FH2 domain-containing protein 1 OS=Homo sapiens GN=FHOD1 PE=1 SV=3                             | 0.001508 | 2.470863 | Yes |
| DIAP1_HUMAN  | Protein diaphanous homolog 1 OS=Homo sapiens GN=DIAPH1 PE=1 SV=2                                   | 0.003538 | 2.463448 | Yes |
| PP6R3_HUMAN  | Serine/threonine-protein phosphatase 6 regulatory subunit 3 OS=Homo sapiens GN=PPP6R3 PE=1 SV=2    | 0.030851 | 2.452876 | Yes |
| RIPK1_HUMAN  | Receptor-interacting serine/threonine-protein kinase 1 OS=Homo sapiens GN=RIPK1 PE=1 SV=3          | 0.019717 | 2.438807 | Yes |
| MCA3_HUMAN   | Eukaryotic translation elongation factor 1 epsilon-1 OS=Homo sapiens GN=EEF1E1 PE=1 SV=1           | 0.002046 | 2.426529 | Yes |
| CIP4_HUMAN   | Cdc42-interacting protein 4 OS=Homo sapiens OX=9606 GN=TRIP10 PE=1 SV=3                            | 0.030755 | 2.425763 | Yes |
| CLU_HUMAN    | Clustered mitochondria protein homolog OS=Homo sapiens GN=CLUH PE=1 SV=2                           | 0.046375 | 2.421189 | Yes |
| TS101_HUMAN  | Tumor susceptibility gene 101 protein OS=Homo sapiens GN=TSG101 PE=1 SV=2                          | 0.008686 | 2.414854 | Yes |
| SURF4_HUMAN  | Surfeit locus protein 4 OS=Homo sapiens OX=9606 GN=SURF4 PE=1 SV=3                                 | 0.004324 | 2.414524 | Yes |
| KANK3_HUMAN  | KN motif and ankyrin repeat domain-containing protein 3 OS=Homo sapiens OX=9606 GN=KANK3 PE=1 SV=1 | 0.044359 | 2.414433 | Yes |
| ITPR3_HUMAN  | Inositol 1,4,5-trisphosphate receptor type 3 OS=Homo sapiens GN=ITPR3 PE=1 SV=2                    | 8.86E-05 | 2.411159 | Yes |
| NQO1_HUMAN   | NAD(P)H dehydrogenase [quinone] 1 OS=Homo sapiens GN=NQO1 PE=1 SV=1                                | 0.020565 | 2.408845 | Yes |
| ZO2_HUMAN    | Tight junction protein ZO-2 OS=Homo sapiens GN=TJP2 PE=1 SV=2                                      | 3.89E-07 | 2.401838 | Yes |
| NEDD1_HUMAN  | Protein NEDD1 OS=Homo sapiens GN=NEDD1 PE=1 SV=1                                                   | 0.003207 | 2.397423 | Yes |
| UTRO_HUMAN   | Utrophin OS=Homo sapiens GN=UTRN PE=1 SV=2                                                         | 3.44E-05 | 2.393274 | Yes |
| CTND1_HUMAN  | Catenin delta-1 OS=Homo sapiens GN=CTNND1 PE=1 SV=1                                                | 7.34E-05 | 2.39319  | Yes |
| WASL_HUMAN   | Neural Wiskott-Aldrich syndrome protein OS=Homo sapiens OX=9606 GN=WASL PE=1 SV=2                  | 0.042104 | 2.38859  | Yes |
| MTMR14_HUMAN | Myotubularin-related protein 14 OS=Homo sapiens OX=9606 GN=MTMR14 PE=1 SV=2                        | 0.004744 | 2.38781  | Yes |

|             |                                                                                               |          |          |     |
|-------------|-----------------------------------------------------------------------------------------------|----------|----------|-----|
| MACF1_HUMAN | Microtubule-actin cross-linking factor 1, isoforms 1/2/3/5 OS=Homo sapiens GN=MACF1 PE=1 SV=4 | 4.58E-06 | 2.385359 | Yes |
| KIF2A_HUMAN | Kinesin-like protein KIF2A OS=Homo sapiens GN=KIF2A PE=1 SV=3                                 | 0.048699 | 2.38054  | Yes |
| TUT7_HUMAN  | Terminal uridylyltransferase 7 OS=Homo sapiens GN=ZCCHC6 PE=1 SV=1                            | 0.035099 | 2.378276 | Yes |
| GPSM1_HUMAN | G-protein-signaling modulator 1 OS=Homo sapiens OX=9606 GN=GPSM1 PE=1 SV=2                    | 0.016391 | 2.375245 | Yes |
| SPAS2_HUMAN | Spermatogenesis-associated serine-rich protein 2 OS=Homo sapiens GN=SPATS2 PE=1 SV=1          | 0.003256 | 2.371368 | Yes |
| TANC1_HUMAN | Protein TANC1 OS=Homo sapiens GN=TANC1 PE=1 SV=3                                              | 0.031505 | 2.366993 | Yes |
| OGA_HUMAN   | Protein O-GlcNAcase OS=Homo sapiens GN=MGEA5 PE=1 SV=2                                        | 0.000115 | 2.357714 | Yes |
| SMAD3_HUMAN | Mothers against decapentaplegic homolog 3 OS=Homo sapiens GN=SMAD3 PE=1 SV=1                  | 0.005267 | 2.356954 | Yes |
| DOCK6_HUMAN | Dedicator of cytokinesis protein 6 OS=Homo sapiens GN=DOCK6 PE=1 SV=3                         | 1.12E-05 | 2.353029 | Yes |
| PGAM5_HUMAN | Serine/threonine-protein phosphatase PGAM5, mitochondrial OS=Homo sapiens GN=PGAM5 PE=1 SV=2  | 0.001048 | 2.334906 | Yes |
| ACTN1_HUMAN | Alpha-actinin-1 OS=Homo sapiens GN=ACTN1 PE=1 SV=2                                            | 0.042347 | 2.326975 | Yes |
| USO1_HUMAN  | General vesicular transport factor p115 OS=Homo sapiens GN=USO1 PE=1 SV=2                     | 3.18E-05 | 2.318769 | Yes |
| F1142_HUMAN | Protein FAM114A2 OS=Homo sapiens OX=9606 GN=FAM114A2 PE=1 SV=4                                | 0.00325  | 2.318614 | Yes |
| LAMA3_HUMAN | Laminin subunit alpha-3 OS=Homo sapiens OX=9606 GN=LAMA3 PE=1 SV=2                            | 0.029625 | 2.310022 | Yes |
| STXB1_HUMAN | Syntaxin-binding protein 1 OS=Homo sapiens GN=STXBP1 PE=1 SV=1                                | 0.037516 | 2.297139 | Yes |
| PTPRK_HUMAN | Receptor-type tyrosine-protein phosphatase kappa OS=Homo sapiens OX=9606 GN=PTPRK PE=1 SV=2   | 0.041832 | 2.293709 | Yes |
| STAR9_HUMAN | StAR-related lipid transfer protein 9 OS=Homo sapiens OX=9606 GN=STARD9 PE=1 SV=3             | 0.035246 | 2.291973 | Yes |
| MB12A_HUMAN | Multivesicular body subunit 12A OS=Homo sapiens OX=9606 GN=MVB12A PE=1 SV=1                   | 0.000266 | 2.284874 | Yes |

|             |                                                                                                   |                  |                  |     |
|-------------|---------------------------------------------------------------------------------------------------|------------------|------------------|-----|
| WFS1_HUMAN  | Wolframin OS=Homo sapiens OX=9606 GN=WFS1 PE=1 SV=2                                               | 0.04<br>638<br>1 | 2.28<br>148<br>8 | Yes |
| OTUD4_HUMAN | OTU domain-containing protein 4 OS=Homo sapiens OX=9606 GN=OTUD4 PE=1 SV=4                        | 0.03<br>502      | 2.27<br>661      | Yes |
| KS6A3_HUMAN | Ribosomal protein S6 kinase alpha-3 OS=Homo sapiens GN=RPS6KA3 PE=1 SV=1                          | 0.01<br>357<br>1 | 2.26<br>960<br>3 | Yes |
| EMAL3_HUMAN | Echinoderm microtubule-associated protein-like 3 OS=Homo sapiens OX=9606 GN=EML3 PE=1 SV=1        | 0.03<br>322<br>5 | 2.26<br>613<br>5 | Yes |
| STAT3_HUMAN | Signal transducer and activator of transcription 3 OS=Homo sapiens GN=STAT3 PE=1 SV=2             | 0.02<br>689      | 2.24<br>927      | Yes |
| SPA5L_HUMAN | Spermatogenesis-associated protein 5-like protein 1 OS=Homo sapiens OX=9606 GN=SPATA5L1 PE=1 SV=2 | 0.00<br>804<br>9 | 2.24<br>758<br>4 | Yes |
| SC31A_HUMAN | Protein transport protein Sec31A OS=Homo sapiens GN=SEC31A PE=1 SV=3                              | 0.00<br>186<br>7 | 2.23<br>891<br>3 | Yes |
| SACS_HUMAN  | Saccin OS=Homo sapiens GN=SACS PE=1 SV=2                                                          | 0.03<br>111<br>2 | 2.23<br>725<br>5 | Yes |
| PDLI1_HUMAN | PDZ and LIM domain protein 1 OS=Homo sapiens GN=PDLIM1 PE=1 SV=4                                  | 0.00<br>025<br>5 | 2.23<br>541<br>7 | Yes |
| DC1L1_HUMAN | Cytoplasmic dynein 1 light intermediate chain 1 OS=Homo sapiens GN=DYNC1L1 PE=1 SV=3              | 2.00<br>E-<br>05 | 2.22<br>039<br>6 | Yes |
| EXOS6_HUMAN | Exosome complex component MTR3 OS=Homo sapiens GN=EXOSC6 PE=1 SV=1                                | 0.04<br>939<br>1 | 2.21<br>4        | Yes |
| DPYL2_HUMAN | Dihydropyrimidinase-related protein 2 OS=Homo sapiens GN=DPYSL2 PE=1 SV=1                         | 0.00<br>069<br>8 | 2.19<br>860<br>1 | Yes |
| LARP4_HUMAN | La-related protein 4 OS=Homo sapiens GN=LARP4 PE=1 SV=3                                           | 0.02<br>983<br>8 | 2.18<br>791<br>3 | Yes |
| UBAP2_HUMAN | Ubiquitin-associated protein 2 OS=Homo sapiens GN=UBAP2 PE=1 SV=1                                 | 1.52<br>E-<br>05 | 2.18<br>057<br>3 | Yes |
| EDC4_HUMAN  | Enhancer of mRNA-decapping protein 4 OS=Homo sapiens GN=EDC4 PE=1 SV=1                            | 0.00<br>051<br>4 | 2.17<br>788<br>2 | Yes |
| SPD2B_HUMAN | SH3 and PX domain-containing protein 2B OS=Homo sapiens GN=SH3PXD2B PE=1 SV=3                     | 4.29<br>E-<br>06 | 2.17<br>748<br>4 | Yes |
| UB2L6_HUMAN | Ubiquitin/ISG15-conjugating enzyme E2 L6 OS=Homo sapiens OX=9606 GN=UBE2L6 PE=1 SV=4              | 0.04<br>118<br>3 | 2.17<br>621      | Yes |
| SMN_HUMAN   | Survival motor neuron protein OS=Homo sapiens OX=9606 GN=SMN1 PE=1 SV=1                           | 0.01<br>901<br>5 | 2.17<br>271<br>4 | Yes |

|              |                                                                                                      |          |          |     |
|--------------|------------------------------------------------------------------------------------------------------|----------|----------|-----|
| DNM1L_HUMAN  | Dynamin-1-like protein OS=Homo sapiens GN=DNM1L PE=1 SV=2                                            | 0.008896 | 2.164687 | Yes |
| GOLGB1_HUMAN | Golgin subfamily B member 1 OS=Homo sapiens GN=GOLGB1 PE=1 SV=2                                      | 7.47E-05 | 2.156621 | Yes |
| MYCBP_HUMAN  | c-Myc-binding protein OS=Homo sapiens OX=9606 GN=MYCBP PE=1 SV=3                                     | 0.021008 | 2.148916 | Yes |
| JCAD_HUMAN   | Junctional protein associated with coronary artery disease OS=Homo sapiens OX=9606 GN=JCAD PE=1 SV=3 | 0.023707 | 2.142666 | Yes |
| RIPOR1_HUMAN | Rho family-interacting cell polarization regulator 1 OS=Homo sapiens OX=9606 GN=RIPOR1 PE=1 SV=1     | 0.003483 | 2.142407 | Yes |
| MAP1B_HUMAN  | Microtubule-associated protein 1B OS=Homo sapiens GN=MAP1B PE=1 SV=2                                 | 2.27E-07 | 2.141737 | Yes |
| CLCA_HUMAN   | Clathrin light chain A OS=Homo sapiens GN=CLTA PE=1 SV=1                                             | 0.000589 | 2.138322 | Yes |
| FOXK1_HUMAN  | Forkhead box protein K1 OS=Homo sapiens OX=9606 GN=FOXK1 PE=1 SV=1                                   | 0.019211 | 2.11391  | Yes |
| ABI1_HUMAN   | Abl interactor 1 OS=Homo sapiens GN=ABI1 PE=1 SV=4                                                   | 0.009159 | 2.106432 | Yes |
| EXOC8_HUMAN  | Exocyst complex component 8 OS=Homo sapiens GN=EXOC8 PE=1 SV=2                                       | 0.040305 | 2.104969 | Yes |
| LIMA1_HUMAN  | LIM domain and actin-binding protein 1 OS=Homo sapiens GN=LIMA1 PE=1 SV=1                            | 0.003366 | 2.10121  | Yes |
| STRN_HUMAN   | Striatin OS=Homo sapiens GN=STRN PE=1 SV=4                                                           | 0.007191 | 2.090953 | Yes |
| LIPB1_HUMAN  | Liprin-beta-1 OS=Homo sapiens GN=PPFIBP1 PE=1 SV=2                                                   | 2.63E-05 | 2.088987 | Yes |
| SHRM4_HUMAN  | Protein Shroom4 OS=Homo sapiens GN=SHROOM4 PE=1 SV=3                                                 | 0.014767 | 2.087466 | Yes |
| CSN3_HUMAN   | COP9 signalosome complex subunit 3 OS=Homo sapiens GN=COPS3 PE=1 SV=3                                | 0.003728 | 2.078286 | Yes |
| UBR4_HUMAN   | E3 ubiquitin-protein ligase UBR4 OS=Homo sapiens GN=UBR4 PE=1 SV=1                                   | 0.000287 | 2.072831 | Yes |
| PRKCI_HUMAN  | Protein kinase C iota type OS=Homo sapiens OX=9606 GN=PRKCI PE=1 SV=2                                | 0.035583 | 2.071291 | Yes |
| TNPO3_HUMAN  | Transportin-3 OS=Homo sapiens OX=9606 GN=TNPO3 PE=1 SV=3                                             | 0.044986 | 2.057738 | Yes |

|             |                                                                                            |                  |                  |     |
|-------------|--------------------------------------------------------------------------------------------|------------------|------------------|-----|
| LRC8A_HUMAN | Volume-regulated anion channel subunit LRRC8A OS=Homo sapiens OX=9606 GN=LRRC8A PE=1 SV=1  | 0.04<br>351<br>3 | 2.04<br>440<br>8 | Yes |
| OGFR_HUMAN  | Opioid growth factor receptor OS=Homo sapiens GN=OGFR PE=1 SV=3                            | 4.66<br>E-<br>05 | 2.03<br>900<br>4 | Yes |
| GIMA1_HUMAN | GTPase IMAP family member 1 OS=Homo sapiens OX=9606 GN=GIMAP1 PE=1 SV=1                    | 0.00<br>012<br>5 | 2.03<br>578      | Yes |
| F120A_HUMAN | Constitutive coactivator of PPAR-gamma-like protein 1 OS=Homo sapiens GN=FAM120A PE=1 SV=2 | 0.00<br>087<br>6 | 2.03<br>398<br>2 | Yes |
| NU214_HUMAN | Nuclear pore complex protein Nup214 OS=Homo sapiens GN=NUP214 PE=1 SV=2                    | 0.00<br>272<br>7 | 2.03<br>308<br>3 | Yes |
| HCFC1_HUMAN | Host cell factor 1 OS=Homo sapiens GN=HCFC1 PE=1 SV=2                                      | 0.00<br>087<br>9 | 2.02<br>662<br>4 | Yes |
| TAOK2_HUMAN | Serine/threonine-protein kinase TAO2 OS=Homo sapiens GN=TAOK2 PE=1 SV=2                    | 0.00<br>548<br>5 | 2.02<br>364<br>5 | Yes |
| GSTO1_HUMAN | Glutathione S-transferase omega-1 OS=Homo sapiens GN=GSTO1 PE=1 SV=2                       | 0.02<br>6        | 2.01<br>226<br>1 | Yes |
| KLC1_HUMAN  | Kinesin light chain 1 OS=Homo sapiens GN=KLC1 PE=1 SV=2                                    | 1.43<br>E-<br>07 | 2.00<br>379<br>1 | Yes |
| NRBP_HUMAN  | Nuclear receptor-binding protein OS=Homo sapiens GN=NRBP1 PE=1 SV=1                        | 0.00<br>392      | 1.98<br>957<br>4 | Yes |
| SC24C_HUMAN | Protein transport protein Sec24C OS=Homo sapiens GN=SEC24C PE=1 SV=3                       | 2.23<br>E-<br>06 | 1.98<br>657<br>5 | Yes |
| NEK6_HUMAN  | Serine/threonine-protein kinase Nek6 OS=Homo sapiens GN=NEK6 PE=1 SV=2                     | 0.01<br>759      | 1.98<br>457<br>2 | Yes |
| CCD50_HUMAN | Coiled-coil domain-containing protein 50 OS=Homo sapiens GN=CCDC50 PE=1 SV=1               | 0.00<br>144<br>8 | 1.97<br>821<br>1 | Yes |
| ZN598_HUMAN | Zinc finger protein 598 OS=Homo sapiens GN=ZNF598 PE=1 SV=1                                | 0.03<br>447<br>9 | 1.97<br>612<br>6 | Yes |
| SYNE1_HUMAN | Nesprin-1 OS=Homo sapiens GN=SYNE1 PE=1 SV=4                                               | 0.01<br>352<br>7 | 1.97<br>541<br>6 | Yes |
| ATLA2_HUMAN | Atlantin-2 OS=Homo sapiens OX=9606 GN=ATL2 PE=1 SV=2                                       | 0.01<br>447<br>2 | 1.96<br>480<br>3 | Yes |
| K1C39_HUMAN | Keratin, type I cytoskeletal 39 OS=Homo sapiens OX=9606 GN=KRT39 PE=1 SV=2                 | 0.00<br>932<br>7 | 1.95<br>937<br>7 | Yes |
| SHLB1_HUMAN | Endophilin-B1 OS=Homo sapiens GN=SH3GLB1 PE=1 SV=1                                         | 0.00<br>574      | 1.95<br>585<br>5 | Yes |



|             |                                                                                                    |                  |                  |     |
|-------------|----------------------------------------------------------------------------------------------------|------------------|------------------|-----|
| PLIN3_HUMAN | Perilipin-3 OS=Homo sapiens GN=PLIN3 PE=1 SV=3                                                     | 5.35<br>E-<br>05 | 1.94<br>852<br>9 | Yes |
| FILA2_HUMAN | Filaggrin-2 OS=Homo sapiens GN=FLG2 PE=1 SV=1                                                      | 0.04<br>295<br>6 | 1.94<br>829<br>8 | Yes |
| RAI14_HUMAN | Ankyrcorbin OS=Homo sapiens GN=RAI14 PE=1 SV=2                                                     | 2.34<br>E-<br>06 | 1.94<br>748<br>8 | Yes |
| DP13A_HUMAN | DCC-interacting protein 13-alpha OS=Homo sapiens GN=APPL1 PE=1 SV=1                                | 0.02<br>403<br>6 | 1.94<br>333<br>2 | Yes |
| DDB2_HUMAN  | DNA damage-binding protein 2 OS=Homo sapiens OX=9606 GN=DDB2 PE=1 SV=1                             | 0.01<br>593<br>4 | 1.93<br>044<br>1 | Yes |
| WDR6_HUMAN  | WD repeat-containing protein 6 OS=Homo sapiens OX=9606 GN=WDR6 PE=1 SV=1                           | 0.02<br>109<br>4 | 1.92<br>289<br>5 | Yes |
| KINH_HUMAN  | Kinesin-1 heavy chain OS=Homo sapiens GN=KIF5B PE=1 SV=1                                           | 0.00<br>101<br>4 | 1.91<br>925<br>6 | Yes |
| TPD54_HUMAN | Tumor protein D54 OS=Homo sapiens GN=TPD52L2 PE=1 SV=2                                             | 0.00<br>587      | 1.91<br>547<br>1 | Yes |
| EMAL4_HUMAN | Echinoderm microtubule-associated protein-like 4 OS=Homo sapiens GN=EML4 PE=1 SV=3                 | 0.02<br>597<br>9 | 1.89<br>880<br>1 | Yes |
| CDC27_HUMAN | Cell division cycle protein 27 homolog OS=Homo sapiens GN=CDC27 PE=1 SV=2                          | 0.00<br>126<br>1 | 1.89<br>345<br>9 | Yes |
| GAPD1_HUMAN | GTPase-activating protein and VPS9 domain-containing protein 1 OS=Homo sapiens GN=GAPVD1 PE=1 SV=2 | 0.00<br>023<br>3 | 1.89<br>344<br>4 | Yes |
| CSN4_HUMAN  | COP9 signalosome complex subunit 4 OS=Homo sapiens GN=COPS4 PE=1 SV=1                              | 0.00<br>017      | 1.88<br>001<br>5 | Yes |
| LARP1_HUMAN | La-related protein 1 OS=Homo sapiens GN=LARP1 PE=1 SV=2                                            | 0.00<br>994<br>4 | 1.87<br>220<br>4 | Yes |
| YIF1B_HUMAN | Protein YIF1B OS=Homo sapiens OX=9606 GN=YIF1B PE=1 SV=1                                           | 0.03<br>444<br>6 | 1.86<br>520<br>2 | Yes |
| VINC_HUMAN  | Vinculin OS=Homo sapiens GN=VCL PE=1 SV=4                                                          | 0.00<br>883<br>4 | 1.85<br>408<br>8 | Yes |
| WASF2_HUMAN | Wiskott-Aldrich syndrome protein family member 2 OS=Homo sapiens GN=WASF2 PE=1 SV=3                | 0.00<br>037<br>9 | 1.84<br>106<br>6 | Yes |
| NUDC1_HUMAN | NudC domain-containing protein 1 OS=Homo sapiens GN=NUDCD1 PE=1 SV=2                               | 0.04<br>434<br>3 | 1.83<br>576      | Yes |
| UBP47_HUMAN | Ubiquitin carboxyl-terminal hydrolase 47 OS=Homo sapiens GN=USP47 PE=1 SV=3                        | 0.00<br>124<br>4 | 1.83<br>523<br>9 | Yes |

|             |                                                                                                         |          |          |     |
|-------------|---------------------------------------------------------------------------------------------------------|----------|----------|-----|
| CLCB_HUMAN  | Clathrin light chain B OS=Homo sapiens GN=CLTB PE=1 SV=1                                                | 0.001156 | 1.832397 | Yes |
| PLPL6_HUMAN | Neuropathy target esterase OS=Homo sapiens GN=PNPLA6 PE=1 SV=2                                          | 0.017444 | 1.816781 | Yes |
| PYR1_HUMAN  | CAD protein OS=Homo sapiens GN=CAD PE=1 SV=3                                                            | 1.06E-08 | 1.810109 | Yes |
| UBE3C_HUMAN | Ubiquitin-protein ligase E3C OS=Homo sapiens GN=UBE3C PE=1 SV=3                                         | 0.030166 | 1.809992 | Yes |
| STAT1_HUMAN | Signal transducer and activator of transcription 1-alpha/beta OS=Homo sapiens GN=STAT1 PE=1 SV=2        | 0.002639 | 1.805222 | Yes |
| GCN1_HUMAN  | eIF-2-alpha kinase activator GCN1 OS=Homo sapiens OX=9606 GN=GCN1 PE=1 SV=6                             | 1.02E-06 | 1.800274 | Yes |
| CE170_HUMAN | Centrosomal protein of 170 kDa OS=Homo sapiens GN=CEP170 PE=1 SV=1                                      | 5.01E-05 | 1.794189 | Yes |
| PDC6L_HUMAN | Programmed cell death 6-interacting protein OS=Homo sapiens GN=PDCD6IP PE=1 SV=1                        | 1.10E-07 | 1.784392 | Yes |
| C1QBP_HUMAN | Complement component 1 Q subcomponent-binding protein, mitochondrial OS=Homo sapiens GN=C1QBP PE=1 SV=1 | 0.004198 | 1.783806 | Yes |
| SCAM3_HUMAN | Secretory carrier-associated membrane protein 3 OS=Homo sapiens GN=SCAMP3 PE=1 SV=3                     | 0.000523 | 1.777757 | Yes |
| PRC2C_HUMAN | Protein PRRC2C OS=Homo sapiens GN=PRRC2C PE=1 SV=4                                                      | 0.000186 | 1.770218 | Yes |
| AGFG1_HUMAN | Arf-GAP domain and FG repeat-containing protein 1 OS=Homo sapiens GN=AGFG1 PE=1 SV=2                    | 0.005364 | 1.758816 | Yes |
| DPP9_HUMAN  | Dipeptidyl peptidase 9 OS=Homo sapiens OX=9606 GN=DPP9 PE=1 SV=3                                        | 0.006637 | 1.745354 | Yes |
| E41L2_HUMAN | Band 4.1-like protein 2 OS=Homo sapiens GN=EPB41L2 PE=1 SV=1                                            | 0.002407 | 1.742807 | Yes |
| MYO5A_HUMAN | Unconventional myosin-Va OS=Homo sapiens GN=MYO5A PE=1 SV=2                                             | 4.39E-05 | 1.73918  | Yes |
| MAGD2_HUMAN | Melanoma-associated antigen D2 OS=Homo sapiens GN=MAGED2 PE=1 SV=2                                      | 0.001237 | 1.738488 | Yes |
| DNJA1_HUMAN | DnaJ homolog subfamily A member 1 OS=Homo sapiens GN=DNAJA1 PE=1 SV=2                                   | 0.011823 | 1.734942 | Yes |
| NU155_HUMAN | Nuclear pore complex protein Nup155 OS=Homo sapiens GN=NUP155 PE=1 SV=1                                 | 0.006928 | 1.72224  | Yes |

|             |                                                                                                     |          |          |     |
|-------------|-----------------------------------------------------------------------------------------------------|----------|----------|-----|
| GFPT1_HUMAN | Glutamine--fructose-6-phosphate aminotransferase [isomerizing] 1 OS=Homo sapiens GN=GFPT1 PE=1 SV=3 | 0.038338 | 1.717737 | Yes |
| ANM5_HUMAN  | Protein arginine N-methyltransferase 5 OS=Homo sapiens GN=PRMT5 PE=1 SV=4                           | 0.002932 | 1.714437 | Yes |
| ZCHC8_HUMAN | Zinc finger CCHC domain-containing protein 8 OS=Homo sapiens OX=9606 GN=ZCCHC8 PE=1 SV=2            | 0.028355 | 1.700424 | Yes |
| NOS3_HUMAN  | Nitric oxide synthase, endothelial OS=Homo sapiens GN=NOS3 PE=1 SV=3                                | 4.09E-05 | 1.697605 | Yes |
| SPTC2_HUMAN | Serine palmitoyltransferase 2 OS=Homo sapiens GN=SPTLC2 PE=1 SV=1                                   | 0.01015  | 1.684767 | Yes |
| UHRF2_HUMAN | E3 ubiquitin-protein ligase UHRF2 OS=Homo sapiens OX=9606 GN=UHRF2 PE=1 SV=1                        | 0.000301 | 1.681156 | Yes |
| UBP10_HUMAN | Ubiquitin carboxyl-terminal hydrolase 10 OS=Homo sapiens GN=USP10 PE=1 SV=2                         | 0.000241 | 1.668615 | Yes |
| PKN1_HUMAN  | Serine/threonine-protein kinase N1 OS=Homo sapiens GN=PKN1 PE=1 SV=2                                | 0.005235 | 1.667616 | Yes |
| TRIR_HUMAN  | Telomerase RNA component interacting RNase OS=Homo sapiens OX=9606 GN=TRIR PE=1 SV=1                | 0.027798 | 1.666711 | Yes |
| MOT1_HUMAN  | Monocarboxylate transporter 1 OS=Homo sapiens GN=SLC16A1 PE=1 SV=3                                  | 0.004514 | 1.641045 | Yes |
| VRK2_HUMAN  | Serine/threonine-protein kinase VRK2 OS=Homo sapiens GN=VRK2 PE=1 SV=3                              | 0.001821 | 1.639451 | Yes |
| ATRAP_HUMAN | Type-1 angiotensin II receptor-associated protein OS=Homo sapiens GN=AGTRAP PE=1 SV=1               | 0.000429 | 1.633818 | Yes |
| CAV1_HUMAN  | Caveolin-1 OS=Homo sapiens GN=CAV1 PE=1 SV=4                                                        | 0.001566 | 1.633629 | Yes |
| PDLI4_HUMAN | PDZ and LIM domain protein 4 OS=Homo sapiens GN=PDLIM4 PE=1 SV=2                                    | 0.002307 | 1.632956 | Yes |
| MAP1S_HUMAN | Microtubule-associated protein 1S OS=Homo sapiens GN=MAP1S PE=1 SV=2                                | 0.0008   | 1.62865  | Yes |
| ACSL4_HUMAN | Long-chain-fatty-acid--CoA ligase 4 OS=Homo sapiens GN=ACSL4 PE=1 SV=2                              | 0.000431 | 1.617264 | Yes |
| M4K4_HUMAN  | Mitogen-activated protein kinase kinase kinase kinase 4 OS=Homo sapiens GN=MAP4K4 PE=1 SV=2         | 0.000282 | 1.606691 | Yes |
| NHRF2_HUMAN | Na(+)/H(+) exchange regulatory cofactor NHE-RF2 OS=Homo sapiens GN=SLC9A3R2 PE=1 SV=2               | 0.02003  | 1.600871 | Yes |

|              |                                                                                                 |                  |                  |     |
|--------------|-------------------------------------------------------------------------------------------------|------------------|------------------|-----|
| ESYT1_HUMAN  | Extended synaptotagmin-1 OS=Homo sapiens GN=ESYT1 PE=1 SV=1                                     | 4.22<br>E-07     | 1.59<br>433<br>3 | Yes |
| TRIM22_HUMAN | E3 ubiquitin-protein ligase TRIM22 OS=Homo sapiens GN=TRIM22 PE=1 SV=1                          | 0.02<br>955<br>3 | 1.59<br>356<br>5 | Yes |
| AKA12_HUMAN  | A-kinase anchor protein 12 OS=Homo sapiens GN=AKAP12 PE=1 SV=4                                  | 0.00<br>207<br>5 | 1.59<br>197<br>3 | Yes |
| SCFD1_HUMAN  | Sec1 family domain-containing protein 1 OS=Homo sapiens GN=SCFD1 PE=1 SV=4                      | 0.00<br>012<br>1 | 1.59<br>174<br>2 | Yes |
| UN45A_HUMAN  | Protein unc-45 homolog A OS=Homo sapiens GN=UNC45A PE=1 SV=1                                    | 0.00<br>151<br>1 | 1.58<br>638      | Yes |
| ILK_HUMAN    | Integrin-linked protein kinase OS=Homo sapiens GN=ILK PE=1 SV=2                                 | 0.02<br>685<br>1 | 1.58<br>333      | Yes |
| NUFP2_HUMAN  | Nuclear fragile X mental retardation-interacting protein 2 OS=Homo sapiens GN=NUFIP2 PE=1 SV=1  | 4.19<br>E-06     | 1.58<br>180<br>6 | Yes |
| LDHB_HUMAN   | L-lactate dehydrogenase B chain OS=Homo sapiens GN=LDHB PE=1 SV=2                               | 3.73<br>E-05     | 1.57<br>046<br>1 | Yes |
| AHNK2_HUMAN  | Protein AHNAK2 OS=Homo sapiens GN=AHNAK2 PE=1 SV=2                                              | 0.00<br>315<br>8 | 1.55<br>330<br>1 | Yes |
| RANB9_HUMAN  | Ran-binding protein 9 OS=Homo sapiens GN=RANBP9 PE=1 SV=1                                       | 0.00<br>256<br>6 | 1.54<br>418<br>2 | Yes |
| EIF3C_HUMAN  | Eukaryotic translation initiation factor 3 subunit C OS=Homo sapiens GN=EIF3C PE=1 SV=1         | 0.00<br>208<br>2 | 1.53<br>924<br>2 | Yes |
| IF4G1_HUMAN  | Eukaryotic translation initiation factor 4 gamma 1 OS=Homo sapiens GN=EIF4G1 PE=1 SV=4          | 2.46<br>E-05     | 1.53<br>484<br>8 | Yes |
| AIP_HUMAN    | AH receptor-interacting protein OS=Homo sapiens OX=9606 GN=AIP PE=1 SV=2                        | 0.00<br>082      | 1.53<br>238      | Yes |
| PIEZ1_HUMAN  | Piezo-type mechanosensitive ion channel component 1 OS=Homo sapiens OX=9606 GN=PIEZO1 PE=1 SV=4 | 0.03<br>528      | 1.52<br>352      | Yes |
| RIR1_HUMAN   | Ribonucleoside-diphosphate reductase large subunit OS=Homo sapiens GN=RRM1 PE=1 SV=1            | 0.01<br>059<br>2 | 1.51<br>733<br>4 | Yes |
| FAS_HUMAN    | Fatty acid synthase OS=Homo sapiens GN=FASN PE=1 SV=3                                           | 4.91<br>E-08     | 1.51<br>479<br>9 | Yes |
| ATX2_HUMAN   | Ataxin-2 OS=Homo sapiens GN=ATXN2 PE=1 SV=2                                                     | 0.01<br>769<br>7 | 1.50<br>875      | Yes |
| PUR2_HUMAN   | Trifunctional purine biosynthetic protein adenosine-3 OS=Homo sapiens GN=GART PE=1 SV=1         | 0.00<br>775<br>2 | 1.48<br>999      | Yes |

|             |                                                                                               |          |          |     |
|-------------|-----------------------------------------------------------------------------------------------|----------|----------|-----|
| CADH5_HUMAN | Cadherin-5 OS=Homo sapiens GN=CDH5 PE=1 SV=5                                                  | 0.028586 | 1.484252 | Yes |
| PPME1_HUMAN | Protein phosphatase methylesterase 1 OS=Homo sapiens GN=PPME1 PE=1 SV=3                       | 0.036919 | 1.483468 | Yes |
| EMD_HUMAN   | Emerin OS=Homo sapiens GN=EMD PE=1 SV=1                                                       | 0.006999 | 1.479578 | Yes |
| UBP2L_HUMAN | Ubiquitin-associated protein 2-like OS=Homo sapiens GN=UBAP2L PE=1 SV=2                       | 7.12E-05 | 1.477048 | Yes |
| SMC2_HUMAN  | Structural maintenance of chromosomes protein 2 OS=Homo sapiens GN=SMC2 PE=1 SV=2             | 0.006169 | 1.475224 | Yes |
| SEP10_HUMAN | Septin-10 OS=Homo sapiens OX=9606 GN=SEPT10 PE=1 SV=2                                         | 0.009035 | 1.471931 | Yes |
| LUZP1_HUMAN | Leucine zipper protein 1 OS=Homo sapiens GN=LUZP1 PE=1 SV=2                                   | 0.0003   | 1.471077 | Yes |
| TNIK_HUMAN  | TRAF2 and NCK-interacting protein kinase OS=Homo sapiens GN=TNIK PE=1 SV=1                    | 0.04929  | 1.453869 | Yes |
| ACTY_HUMAN  | Beta-centractin OS=Homo sapiens GN=ACTR1B PE=1 SV=1                                           | 0.025344 | 1.453056 | Yes |
| CSN2_HUMAN  | COP9 signalosome complex subunit 2 OS=Homo sapiens GN=COPS2 PE=1 SV=1                         | 0.010099 | 1.450238 | Yes |
| SMC4_HUMAN  | Structural maintenance of chromosomes protein 4 OS=Homo sapiens GN=SMC4 PE=1 SV=2             | 0.01533  | 1.435564 | Yes |
| SRPRA_HUMAN | Signal recognition particle receptor subunit alpha OS=Homo sapiens OX=9606 GN=SRPRA PE=1 SV=2 | 0.001548 | 1.430577 | Yes |
| HCLS1_HUMAN | Hematopoietic lineage cell-specific protein OS=Homo sapiens GN=HCLS1 PE=1 SV=3                | 9.06E-05 | 1.420436 | Yes |
| RTF2_HUMAN  | Protein RTF2 homolog OS=Homo sapiens GN=RTFDC1 PE=1 SV=3                                      | 0.043493 | 1.411443 | Yes |
| IMDH1_HUMAN | Inosine-5'-monophosphate dehydrogenase 1 OS=Homo sapiens GN=IMPDH1 PE=1 SV=2                  | 0.007566 | 1.408804 | Yes |
| SYRC_HUMAN  | Arginine--tRNA ligase, cytoplasmic OS=Homo sapiens GN=RARS PE=1 SV=2                          | 0.001244 | 1.40836  | Yes |
| STK10_HUMAN | Serine/threonine-protein kinase 10 OS=Homo sapiens GN=STK10 PE=1 SV=1                         | 0.016961 | 1.400512 | Yes |
| ARHGAM1     | Rho guanine nucleotide exchange factor 10 OS=Homo sapiens GN=ARHGEF10 PE=1 SV=4               | 0.013212 | 1.399367 | Yes |

|             |                                                                                                          |          |          |     |
|-------------|----------------------------------------------------------------------------------------------------------|----------|----------|-----|
| PCBP1_HUMAN | Poly(rC)-binding protein 1 OS=Homo sapiens GN=PCBP1 PE=1 SV=2                                            | 0.001252 | 1.397992 | Yes |
| ACINU_HUMAN | Apoptotic chromatin condensation inducer in the nucleus OS=Homo sapiens GN=ACIN1 PE=1 SV=2               | 0.041971 | 1.387462 | Yes |
| AIMP1_HUMAN | Aminoacyl tRNA synthase complex-interacting multifunctional protein 1 OS=Homo sapiens GN=AIMP1 PE=1 SV=2 | 2.56E-05 | 1.385802 | Yes |
| XPO5_HUMAN  | Exportin-5 OS=Homo sapiens GN=XPO5 PE=1 SV=1                                                             | 0.035808 | 1.369706 | Yes |
| DLGP5_HUMAN | Disks large-associated protein 5 OS=Homo sapiens GN=DLGAP5 PE=1 SV=2                                     | 0.005859 | 1.36834  | Yes |
| RPB2_HUMAN  | DNA-directed RNA polymerase II subunit RPB2 OS=Homo sapiens GN=POLR2B PE=1 SV=1                          | 0.01224  | 1.359717 | Yes |
| NU205_HUMAN | Nuclear pore complex protein Nup205 OS=Homo sapiens GN=NUP205 PE=1 SV=3                                  | 0.023798 | 1.348948 | Yes |
| FKBP8_HUMAN | Peptidyl-prolyl cis-trans isomerase FKBP8 OS=Homo sapiens GN=FKBP8 PE=1 SV=2                             | 0.015296 | 1.348654 | Yes |
| CAND1_HUMAN | Cullin-associated NEDD8-dissociated protein 1 OS=Homo sapiens GN=CAND1 PE=1 SV=2                         | 0.003015 | 1.348173 | Yes |
| FLNB_HUMAN  | Filamin-B OS=Homo sapiens GN=FLNB PE=1 SV=2                                                              | 0.0019   | 1.346757 | Yes |
| ACLY_HUMAN  | ATP-citrate synthase OS=Homo sapiens GN=ACLY PE=1 SV=3                                                   | 0.008457 | 1.344149 | Yes |
| SYEP_HUMAN  | Bifunctional glutamate/proline--tRNA ligase OS=Homo sapiens GN=EPRS PE=1 SV=5                            | 2.96E-08 | 1.342395 | Yes |
| NDUS3_HUMAN | NADH dehydrogenase [ubiquinone] iron-sulfur protein 3, mitochondrial OS=Homo sapiens GN=NDUFS3 PE=1 SV=1 | 0.006039 | 1.342199 | Yes |
| TERA_HUMAN  | Transitional endoplasmic reticulum ATPase OS=Homo sapiens GN=VCP PE=1 SV=4                               | 7.39E-07 | 1.339453 | Yes |
| SYIC_HUMAN  | Isoleucine--tRNA ligase, cytoplasmic OS=Homo sapiens GN=IARS PE=1 SV=2                                   | 0.004937 | 1.339154 | Yes |
| RAIN_HUMAN  | Ras-interacting protein 1 OS=Homo sapiens GN=RASIP1 PE=1 SV=1                                            | 0.000341 | 1.337265 | Yes |
| CORO7_HUMAN | Coronin-7 OS=Homo sapiens GN=CORO7 PE=1 SV=2                                                             | 0.01857  | 1.336499 | Yes |
| TFR1_HUMAN  | Transferrin receptor protein 1 OS=Homo sapiens GN=TFRC PE=1 SV=2                                         | 0.030583 | 1.334743 | Yes |

|             |                                                                                           |                  |                  |     |
|-------------|-------------------------------------------------------------------------------------------|------------------|------------------|-----|
| GDIB_HUMAN  | Rab GDP dissociation inhibitor beta OS=Homo sapiens GN=GDI2 PE=1 SV=2                     | 0.02<br>628<br>6 | 1.33<br>248<br>7 | Yes |
| VATH_HUMAN  | V-type proton ATPase subunit H OS=Homo sapiens GN=ATP6V1H PE=1 SV=1                       | 0.00<br>260<br>8 | 1.32<br>515<br>7 | Yes |
| LRRF1_HUMAN | Leucine-rich repeat flightless-interacting protein 1 OS=Homo sapiens GN=LRRFIP1 PE=1 SV=2 | 0.00<br>302<br>3 | 1.31<br>950<br>6 | Yes |
| VIGLN_HUMAN | Vigilin OS=Homo sapiens GN=HDLBP PE=1 SV=2                                                | 3.02<br>E-<br>08 | 1.31<br>667<br>2 | Yes |
| FLNA_HUMAN  | Filamin-A OS=Homo sapiens GN=FLNA PE=1 SV=4                                               | 5.95<br>E-<br>07 | 1.30<br>688<br>7 | Yes |
| XPO1_HUMAN  | Exportin-1 OS=Homo sapiens GN=XPO1 PE=1 SV=1                                              | 0.00<br>381<br>8 | 1.30<br>609<br>5 | Yes |
| CLH1_HUMAN  | Clathrin heavy chain 1 OS=Homo sapiens GN=CLTC PE=1 SV=5                                  | 1.86<br>E-<br>05 | 1.30<br>553<br>5 | Yes |
| DYHC1_HUMAN | Cytoplasmic dynein 1 heavy chain 1 OS=Homo sapiens GN=DYNC1H1 PE=1 SV=5                   | 1.79<br>E-<br>07 | 1.30<br>545<br>8 | Yes |
| MARE2_HUMAN | Microtubule-associated protein RP/EB family member 2 OS=Homo sapiens GN=MAPRE2 PE=1 SV=1  | 0.00<br>920<br>8 | 1.29<br>745<br>3 | Yes |
| SRC8_HUMAN  | Src substrate cortactin OS=Homo sapiens GN=CTTN PE=1 SV=2                                 | 0.00<br>088<br>2 | 1.29<br>673<br>8 | Yes |
| OPA1_HUMAN  | Dynamamin-like 120 kDa protein, mitochondrial OS=Homo sapiens OX=9606 GN=OPA1 PE=1 SV=3   | 0.03<br>940<br>9 | 1.29<br>485<br>9 | Yes |
| RRP44_HUMAN | Exosome complex exonuclease RRP44 OS=Homo sapiens GN=DIS3 PE=1 SV=2                       | 0.00<br>411<br>8 | 1.28<br>143<br>8 | Yes |
| PLAK_HUMAN  | Junction plakoglobin OS=Homo sapiens GN=JUP PE=1 SV=3                                     | 0.01<br>809<br>2 | 1.28<br>007<br>2 | Yes |
| NUP98_HUMAN | Nuclear pore complex protein Nup98-Nup96 OS=Homo sapiens OX=9606 GN=NUP98 PE=1 SV=4       | 0.02<br>897<br>6 | 1.27<br>857      | Yes |
| RUVB1_HUMAN | RuvB-like 1 OS=Homo sapiens GN=RUVBL1 PE=1 SV=1                                           | 4.41<br>E-<br>06 | 1.27<br>108      | Yes |
| SYQ_HUMAN   | Glutamine--tRNA ligase OS=Homo sapiens GN=QARS PE=1 SV=1                                  | 0.02<br>027<br>3 | 1.27<br>04       | Yes |
| DDX20_HUMAN | Probable ATP-dependent RNA helicase DDX20 OS=Homo sapiens GN=DDX20 PE=1 SV=2              | 0.02<br>954<br>3 | 1.25<br>865<br>9 | Yes |
| SYCC_HUMAN  | Cysteine--tRNA ligase, cytoplasmic OS=Homo sapiens GN=CARS PE=1 SV=3                      | 0.00<br>860<br>4 | 1.24<br>271<br>2 | Yes |

|              |                                                                                            |          |          |     |
|--------------|--------------------------------------------------------------------------------------------|----------|----------|-----|
| RHG18_HUMAN  | Rho GTPase-activating protein 18 OS=Homo sapiens GN=ARHGAP18 PE=1 SV=3                     | 0.008288 | 1.229578 | Yes |
| DCTN2_HUMAN  | Dynactin subunit 2 OS=Homo sapiens GN=DCTN2 PE=1 SV=4                                      | 0.001207 | 1.213639 | Yes |
| HMOX1_HUMAN  | Heme oxygenase 1 OS=Homo sapiens GN=HMOX1 PE=1 SV=1                                        | 0.004005 | 1.209741 | Yes |
| STRAP_HUMAN  | Serine-threonine kinase receptor-associated protein OS=Homo sapiens GN=STRAP PE=1 SV=1     | 0.04012  | 1.208639 | Yes |
| RUVB2_HUMAN  | RuvB-like 2 OS=Homo sapiens GN=RUVBL2 PE=1 SV=3                                            | 7.57E-06 | 1.203432 | Yes |
| MYO1E_HUMAN  | Unconventional myosin-Ie OS=Homo sapiens GN=MYO1E PE=1 SV=2                                | 0.004086 | 1.197336 | Yes |
| CCDC47_HUMAN | Coiled-coil domain-containing protein 47 OS=Homo sapiens GN=CCDC47 PE=1 SV=1               | 0.025838 | 1.18641  | Yes |
| CTNA1_HUMAN  | Catenin alpha-1 OS=Homo sapiens GN=CTNNA1 PE=1 SV=1                                        | 0.014199 | 1.17683  | Yes |
| KBP_HUMAN    | KIF1-binding protein OS=Homo sapiens GN=KIF1BP PE=1 SV=1                                   | 0.029346 | 1.17606  | Yes |
| NCKP1_HUMAN  | Nck-associated protein 1 OS=Homo sapiens GN=NCKAP1 PE=1 SV=1                               | 0.005719 | 1.169864 | Yes |
| NSF_HUMAN    | Vesicle-fusing ATPase OS=Homo sapiens GN=NSF PE=1 SV=3                                     | 0.000824 | 1.165005 | Yes |
| FLNC_HUMAN   | Filamin-C OS=Homo sapiens GN=FLNC PE=1 SV=3                                                | 0.023371 | 1.158495 | Yes |
| DYSF_HUMAN   | Dysferlin OS=Homo sapiens GN=DYSF PE=1 SV=1                                                | 9.06E-05 | 1.156124 | Yes |
| PELO_HUMAN   | Protein pelota homolog OS=Homo sapiens GN=PELO PE=1 SV=2                                   | 0.023795 | 1.148872 | Yes |
| PICAL_HUMAN  | Phosphatidylinositol-binding clathrin assembly protein OS=Homo sapiens GN=PICALM PE=1 SV=2 | 0.012817 | 1.124586 | Yes |
| FUBP3_HUMAN  | Far upstream element-binding protein 3 OS=Homo sapiens GN=FUBP3 PE=1 SV=2                  | 0.030156 | 1.124557 | Yes |
| VATB2_HUMAN  | V-type proton ATPase subunit B, brain isoform OS=Homo sapiens GN=ATP6V1B2 PE=1 SV=3        | 0.010959 | 1.119744 | Yes |
| PURA2_HUMAN  | Adenylosuccinate synthetase isozyme 2 OS=Homo sapiens GN=ADSS PE=1 SV=3                    | 0.002085 | 1.115458 | Yes |



|              |                                                                                                 |          |         |     |
|--------------|-------------------------------------------------------------------------------------------------|----------|---------|-----|
| DAPK3_HUMAN  | Death-associated protein kinase 3 OS=Homo sapiens OX=9606 GN=DAPK3 PE=1 SV=1                    | 0.00510  | 1.11249 | Yes |
| IF2B2_HUMAN  | Insulin-like growth factor 2 mRNA-binding protein 2 OS=Homo sapiens GN=IGF2BP2 PE=1 SV=2        | 0.03766  | 1.10194 | Yes |
| PIN1_HUMAN   | Peptidyl-prolyl cis-trans isomerase NIMA-interacting 1 OS=Homo sapiens GN=PIN1 PE=1 SV=1        | 0.03294  | 1.09407 | Yes |
| VASP_HUMAN   | Vasodilator-stimulated phosphoprotein OS=Homo sapiens GN=VASP PE=1 SV=3                         | 0.04736  | 1.08866 | Yes |
| TIF1B_HUMAN  | Transcription intermediary factor 1-beta OS=Homo sapiens GN=TRIM28 PE=1 SV=5                    | 0.00765  | 1.08505 | Yes |
| SRPK1_HUMAN  | SRSF protein kinase 1 OS=Homo sapiens GN=SRPK1 PE=1 SV=2                                        | 0.01025  | 1.07414 | Yes |
| CAN1_HUMAN   | Calpain-1 catalytic subunit OS=Homo sapiens GN=CAPN1 PE=1 SV=1                                  | 0.02099  | 1.06493 | Yes |
| ICAL_HUMAN   | Calpastatin OS=Homo sapiens GN=CAST PE=1 SV=4                                                   | 0.01335  | 1.05650 | Yes |
| EIF3K_HUMAN  | Eukaryotic translation initiation factor 3 subunit K OS=Homo sapiens OX=9606 GN=EIF3K PE=1 SV=1 | 0.01425  | 1.04500 | Yes |
| LBR_HUMAN    | Lamin-B receptor OS=Homo sapiens GN=LBR PE=1 SV=2                                               | 0.03837  | 1.03657 | Yes |
| PUR4_HUMAN   | Phosphoribosylformylglycinamide synthase OS=Homo sapiens GN=PFAS PE=1 SV=4                      | 0.03341  | 1.03517 | Yes |
| SYLC_HUMAN   | Leucine--tRNA ligase, cytoplasmic OS=Homo sapiens GN=LARS PE=1 SV=2                             | 0.00630  | 1.0298  | Yes |
| GLGB_HUMAN   | 1,4-alpha-glucan-branching enzyme OS=Homo sapiens GN=GBE1 PE=1 SV=3                             | 0.00015  | 1.02945 | Yes |
| ZN185_HUMAN  | Zinc finger protein 185 OS=Homo sapiens GN=ZNF185 PE=1 SV=3                                     | 6.78E-05 | 1.02418 | Yes |
| SEC22B_HUMAN | Vesicle-trafficking protein SEC22b OS=Homo sapiens GN=SEC22B PE=1 SV=4                          | 0.00682  | 1.01965 | Yes |
| PDLIM5_HUMAN | PDZ and LIM domain protein 5 OS=Homo sapiens GN=PDLIM5 PE=1 SV=5                                | 0.02109  | 1.01205 | Yes |
| RAB5C_HUMAN  | Ras-related protein Rab-5C OS=Homo sapiens GN=RAB5C PE=1 SV=2                                   | 0.01719  | 1.00932 | Yes |
| TBC15_HUMAN  | TBC1 domain family member 15 OS=Homo sapiens GN=TBC1D15 PE=1 SV=2                               | 0.03030  | 1.00455 | Yes |

|             |                                                                                            |                  |                  |     |
|-------------|--------------------------------------------------------------------------------------------|------------------|------------------|-----|
| SYAC_HUMAN  | Alanine--tRNA ligase, cytoplasmic OS=Homo sapiens GN=AARS PE=1 SV=2                        | 0.00<br>351<br>6 | 0.99<br>81       | Yes |
| PLEC_HUMAN  | Plectin OS=Homo sapiens GN=PLEC PE=1 SV=3                                                  | 7.88<br>E-<br>05 | 0.97<br>925<br>6 | Yes |
| IF4B_HUMAN  | Eukaryotic translation initiation factor 4B OS=Homo sapiens GN=EIF4B PE=1 SV=2             | 0.00<br>015<br>7 | 0.95<br>222<br>4 | Yes |
| PAK2_HUMAN  | Serine/threonine-protein kinase PAK 2 OS=Homo sapiens GN=PAK2 PE=1 SV=3                    | 0.00<br>828<br>9 | 0.94<br>290<br>2 | Yes |
| HS105_HUMAN | Heat shock protein 105 kDa OS=Homo sapiens GN=HSPH1 PE=1 SV=1                              | 0.00<br>295<br>7 | 0.94<br>262<br>9 | Yes |
| SRRM2_HUMAN | Serine/arginine repetitive matrix protein 2 OS=Homo sapiens GN=SRRM2 PE=1 SV=2             | 0.00<br>934<br>3 | 0.93<br>159<br>4 | Yes |
| G6PD_HUMAN  | Glucose-6-phosphate 1-dehydrogenase OS=Homo sapiens GN=G6PD PE=1 SV=4                      | 0.03<br>098<br>6 | 0.92<br>889<br>2 | Yes |
| SLFN5_HUMAN | Schlafen family member 5 OS=Homo sapiens GN=SLFN5 PE=1 SV=1                                | 0.00<br>786      | 0.92<br>455<br>6 | Yes |
| KTN1_HUMAN  | Kinectin OS=Homo sapiens GN=KTN1 PE=1 SV=1                                                 | 0.01<br>666<br>1 | 0.91<br>785<br>7 | Yes |
| RIC8A_HUMAN | Synembryn-A OS=Homo sapiens OX=9606 GN=RIC8A PE=1 SV=3                                     | 0.03<br>656      | 0.91<br>455<br>7 | Yes |
| GNAI2_HUMAN | Guanine nucleotide-binding protein G(i) subunit alpha-2 OS=Homo sapiens GN=GNAI2 PE=1 SV=3 | 0.00<br>700<br>4 | 0.90<br>774<br>8 | Yes |
| SYDC_HUMAN  | Aspartate--tRNA ligase, cytoplasmic OS=Homo sapiens GN=DARS PE=1 SV=2                      | 0.00<br>153<br>5 | 0.90<br>489<br>7 | Yes |
| COPG1_HUMAN | Coatomer subunit gamma-1 OS=Homo sapiens GN=COPG1 PE=1 SV=1                                | 0.00<br>716<br>5 | 0.90<br>401<br>1 | Yes |
| CAPR1_HUMAN | Caprin-1 OS=Homo sapiens GN=CAPRIN1 PE=1 SV=2                                              | 0.00<br>121<br>5 | 0.90<br>205<br>5 | Yes |
| IMDH2_HUMAN | Inosine-5'-monophosphate dehydrogenase 2 OS=Homo sapiens GN=IMPDH2 PE=1 SV=2               | 0.00<br>098<br>4 | 0.90<br>033<br>9 | Yes |
| EIF3B_HUMAN | Eukaryotic translation initiation factor 3 subunit B OS=Homo sapiens GN=EIF3B PE=1 SV=3    | 0.00<br>302<br>8 | 0.89<br>124<br>4 | Yes |
| PPM1G_HUMAN | Protein phosphatase 1G OS=Homo sapiens GN=PPM1G PE=1 SV=1                                  | 0.04<br>747<br>6 | 0.88<br>402<br>8 | Yes |
| MARE1_HUMAN | Microtubule-associated protein RP/EB family member 1 OS=Homo sapiens GN=MAPRE1 PE=1 SV=3   | 0.02<br>095<br>8 | 0.88<br>301<br>3 | Yes |

|             |                                                                                         |              |              |     |
|-------------|-----------------------------------------------------------------------------------------|--------------|--------------|-----|
| EIF3A_HUMAN | Eukaryotic translation initiation factor 3 subunit A OS=Homo sapiens GN=EIF3A PE=1 SV=1 | 8.16<br>E-05 | 0.88<br>2519 | Yes |
| RAGP1_HUMAN | Ran GTPase-activating protein 1 OS=Homo sapiens GN=RANGAP1 PE=1 SV=1                    | 0.00<br>9658 | 0.87<br>7546 | Yes |
| CAPZB_HUMAN | F-actin-capping protein subunit beta OS=Homo sapiens GN=CAPZB PE=1 SV=4                 | 0.00<br>915  | 0.87<br>3303 | Yes |
| MYOF_HUMAN  | Myoferlin OS=Homo sapiens GN=MYOF PE=1 SV=1                                             | 0.01<br>1915 | 0.87<br>231  | Yes |
| RHOC_HUMAN  | Rho-related GTP-binding protein RhoC OS=Homo sapiens GN=RHOC PE=1 SV=1                  | 0.01<br>157  | 0.85<br>3347 | Yes |
| CAVN2_HUMAN | Caveolae-associated protein 2 OS=Homo sapiens OX=9606 GN=CAVIN2 PE=1 SV=3               | 0.01<br>1294 | 0.85<br>0189 | Yes |
| RAB5A_HUMAN | Ras-related protein Rab-5A OS=Homo sapiens GN=RAB5A PE=1 SV=2                           | 0.04<br>9888 | 0.84<br>3349 | Yes |
| ADDA_HUMAN  | Alpha-adducin OS=Homo sapiens GN=ADD1 PE=1 SV=2                                         | 0.04<br>2492 | 0.83<br>193  | Yes |
| SPTB2_HUMAN | Spectrin beta chain, non-erythrocytic 1 OS=Homo sapiens GN=SPTBN1 PE=1 SV=2             | 0.01<br>2372 | 0.82<br>8956 | Yes |
| RS4X_HUMAN  | 40S ribosomal protein S4, X isoform OS=Homo sapiens GN=RPS4X PE=1 SV=2                  | 0.04<br>138  | 0.82<br>5692 | Yes |
| CNN2_HUMAN  | Calponin-2 OS=Homo sapiens GN=CNN2 PE=1 SV=4                                            | 0.03<br>6044 | 0.82<br>3743 | Yes |
| PRS7_HUMAN  | 26S protease regulatory subunit 7 OS=Homo sapiens GN=PSMC2 PE=1 SV=3                    | 0.00<br>0917 | 0.80<br>4887 | Yes |
| GSH0_HUMAN  | Glutamate--cysteine ligase regulatory subunit OS=Homo sapiens GN=GCLM PE=1 SV=1         | 0.00<br>7182 | 0.80<br>3707 | Yes |
| SERA_HUMAN  | D-3-phosphoglycerate dehydrogenase OS=Homo sapiens GN=PHGDH PE=1 SV=4                   | 0.01<br>8866 | 0.80<br>3605 | Yes |
| C1TC_HUMAN  | C-1-tetrahydrofolate synthase, cytoplasmic OS=Homo sapiens GN=MTHFD1 PE=1 SV=3          | 0.01<br>1716 | 0.80<br>2098 | Yes |
| DBNL_HUMAN  | Drebrin-like protein OS=Homo sapiens GN=DBNL PE=1 SV=1                                  | 0.02<br>273  | 0.79<br>5258 | Yes |
| VATA_HUMAN  | V-type proton ATPase catalytic subunit A OS=Homo sapiens GN=ATP6V1A PE=1 SV=2           | 0.02<br>7587 | 0.78<br>3515 | Yes |
| E41L3_HUMAN | Band 4.1-like protein 3 OS=Homo sapiens GN=EPB41L3 PE=1 SV=2                            | 0.04<br>06   | 0.77<br>0434 | Yes |

|             |                                                                                         |                  |                  |     |
|-------------|-----------------------------------------------------------------------------------------|------------------|------------------|-----|
| STOM_HUMAN  | Erythrocyte band 7 integral membrane protein OS=Homo sapiens GN=STOM PE=1 SV=3          | 0.03<br>727<br>9 | 0.75<br>477<br>1 | Yes |
| EIF3E_HUMAN | Eukaryotic translation initiation factor 3 subunit E OS=Homo sapiens GN=EIF3E PE=1 SV=1 | 0.00<br>232<br>8 | 0.75<br>327<br>1 | Yes |
| FLII_HUMAN  | Protein flightless-1 homolog OS=Homo sapiens GN=FLII PE=1 SV=2                          | 0.02<br>113<br>1 | 0.75<br>023<br>5 | Yes |
| CAVN1_HUMAN | Caveolae-associated protein 1 OS=Homo sapiens OX=9606 GN=CAVIN1 PE=1 SV=1               | 0.00<br>210<br>9 | 0.74<br>758<br>7 | Yes |
| IQGA1_HUMAN | Ras GTPase-activating-like protein IQGAP1 OS=Homo sapiens GN=IQGAP1 PE=1 SV=1           | 0.00<br>038<br>3 | 0.74<br>722<br>8 | Yes |
| COPA_HUMAN  | Coatomer subunit alpha OS=Homo sapiens GN=COPA PE=1 SV=2                                | 7.96<br>E-<br>05 | 0.74<br>623<br>6 | Yes |
| AHNK_HUMAN  | Neuroblast differentiation-associated protein AHNAK OS=Homo sapiens GN=AHNAK PE=1 SV=2  | 1.41<br>E-<br>06 | 0.72<br>976<br>6 | Yes |
| TWF2_HUMAN  | Twinfilin-2 OS=Homo sapiens GN=TWF2 PE=1 SV=2                                           | 0.02<br>815<br>1 | 0.71<br>915<br>6 | Yes |
| CDC37_HUMAN | Hsp90 co-chaperone Cdc37 OS=Homo sapiens GN=CDC37 PE=1 SV=1                             | 0.02<br>689<br>1 | 0.70<br>954<br>9 | Yes |
| PRDX1_HUMAN | Peroxiredoxin-1 OS=Homo sapiens GN=PRDX1 PE=1 SV=1                                      | 0.04<br>562<br>4 | 0.70<br>291<br>4 | Yes |
| PRS8_HUMAN  | 26S protease regulatory subunit 8 OS=Homo sapiens GN=PSMC5 PE=1 SV=1                    | 0.00<br>88       | 0.69<br>321<br>7 | Yes |
| FUBP2_HUMAN | Far upstream element-binding protein 2 OS=Homo sapiens GN=KHSRP PE=1 SV=4               | 0.04<br>481<br>7 | 0.67<br>587<br>8 | Yes |
| HSP7C_HUMAN | Heat shock cognate 71 kDa protein OS=Homo sapiens GN=HSPA8 PE=1 SV=1                    | 0.00<br>045<br>1 | 0.66<br>216<br>5 | Yes |
| DDX3X_HUMAN | ATP-dependent RNA helicase DDX3X OS=Homo sapiens GN=DDX3X PE=1 SV=3                     | 0.01<br>070<br>6 | 0.65<br>182<br>1 | Yes |
| MAP4_HUMAN  | Microtubule-associated protein 4 OS=Homo sapiens GN=MAP4 PE=1 SV=3                      | 0.00<br>046<br>1 | 0.64<br>939<br>6 | Yes |
| KCD12_HUMAN | BTB/POZ domain-containing protein KCTD12 OS=Homo sapiens GN=KCTD12 PE=1 SV=1            | 0.04<br>054<br>3 | 0.63<br>654<br>2 | Yes |
| CSDE1_HUMAN | Cold shock domain-containing protein E1 OS=Homo sapiens GN=CSDE1 PE=1 SV=2              | 0.03<br>001<br>7 | 0.59<br>749<br>1 | Yes |
| TLN1_HUMAN  | Talin-1 OS=Homo sapiens GN=TLN1 PE=1 SV=3                                               | 0.00<br>091<br>3 | 0.59<br>502<br>6 | Yes |

|             |                                                                                                                  |                  |                  |     |
|-------------|------------------------------------------------------------------------------------------------------------------|------------------|------------------|-----|
| CAN2_HUMAN  | Calpain-2 catalytic subunit OS=Homo sapiens GN=CAPN2 PE=1 SV=6                                                   | 0.00<br>607<br>1 | 0.58<br>809<br>8 | Yes |
| PRKDC_HUMAN | DNA-dependent protein kinase catalytic subunit OS=Homo sapiens GN=PRKDC PE=1 SV=3                                | 0.00<br>045<br>5 | 0.58<br>567<br>3 | Yes |
| SYWC_HUMAN  | Tryptophan--tRNA ligase, cytoplasmic OS=Homo sapiens GN=WARS PE=1 SV=2                                           | 0.02<br>247<br>2 | 0.56<br>551<br>9 | Yes |
| EHD4_HUMAN  | EH domain-containing protein 4 OS=Homo sapiens GN=EHD4 PE=1 SV=1                                                 | 0.00<br>967      | 0.50<br>945<br>9 | Yes |
| MYO1C_HUMAN | Unconventional myosin-Ic OS=Homo sapiens GN=MYO1C PE=1 SV=4                                                      | 0.00<br>831      | 0.42<br>758<br>3 | Yes |
| HNRPU_HUMAN | Heterogeneous nuclear ribonucleoprotein U OS=Homo sapiens GN=HNRNPU PE=1 SV=6                                    | 0.03<br>250<br>7 | -<br>0.30<br>971 | Yes |
| DHE3_HUMAN  | Glutamate dehydrogenase 1, mitochondrial OS=Homo sapiens GN=GLUD1 PE=1 SV=2                                      | 0.03<br>686      | -<br>0.34<br>578 | Yes |
| RS3A_HUMAN  | 40S ribosomal protein S3a OS=Homo sapiens GN=RPS3A PE=1 SV=2                                                     | 0.02<br>975<br>7 | -<br>0.37<br>701 | Yes |
| KHDR1_HUMAN | KH domain-containing, RNA-binding, signal transduction-associated protein 1 OS=Homo sapiens GN=KHDRBS1 PE=1 SV=1 | 0.00<br>212      | -<br>0.40<br>807 | Yes |
| DHX9_HUMAN  | ATP-dependent RNA helicase A OS=Homo sapiens GN=DHX9 PE=1 SV=4                                                   | 0.04<br>093<br>3 | -<br>0.43<br>488 | Yes |
| LMNA_HUMAN  | Prelamin-A/C OS=Homo sapiens GN=LMNA PE=1 SV=1                                                                   | 0.00<br>977<br>1 | -<br>0.44<br>163 | Yes |
| MVP_HUMAN   | Major vault protein OS=Homo sapiens GN=MVP PE=1 SV=4                                                             | 0.02<br>153<br>4 | -<br>0.44<br>946 | Yes |
| MCCA_HUMAN  | Methylcrotonoyl-CoA carboxylase subunit alpha, mitochondrial OS=Homo sapiens GN=MCCC1 PE=1 SV=3                  | 0.04<br>594<br>2 | -<br>0.49<br>715 | Yes |
| RL23A_HUMAN | 60S ribosomal protein L23a OS=Homo sapiens GN=RPL23A PE=1 SV=1                                                   | 0.04<br>851<br>5 | -<br>0.50<br>096 | Yes |
| SFPQ_HUMAN  | Splicing factor, proline- and glutamine-rich OS=Homo sapiens GN=SFPQ PE=1 SV=2                                   | 0.00<br>672<br>9 | -<br>0.51<br>532 | Yes |
| RL36_HUMAN  | 60S ribosomal protein L36 OS=Homo sapiens GN=RPL36 PE=1 SV=3                                                     | 0.02<br>156<br>9 | -<br>0.52<br>808 | Yes |
| RL38_HUMAN  | 60S ribosomal protein L38 OS=Homo sapiens GN=RPL38 PE=1 SV=2                                                     | 0.01<br>115<br>3 | -<br>0.53<br>188 | Yes |
| RBM39_HUMAN | RNA-binding protein 39 OS=Homo sapiens GN=RBM39 PE=1 SV=2                                                        | 0.03<br>318<br>3 | -<br>0.55<br>797 | Yes |

|                     |                                                                                        |                  |                  |     |
|---------------------|----------------------------------------------------------------------------------------|------------------|------------------|-----|
| NPM_H<br>UMAN       | Nucleophosmin OS=Homo sapiens GN=NPM1 PE=1 SV=2                                        | 0.04<br>708<br>4 | -<br>0.57<br>635 | Yes |
| HMGA<br>1_HUM<br>AN | High mobility group protein HMG-I/HMG-Y OS=Homo sapiens GN=HMGA1 PE=1 SV=3             | 0.02<br>202<br>3 | -<br>0.58<br>62  | Yes |
| RCC1_<br>HUMA<br>N  | Regulator of chromosome condensation OS=Homo sapiens GN=RCC1 PE=1 SV=1                 | 0.03<br>151<br>9 | -<br>0.58<br>871 | Yes |
| XPO2_<br>HUMA<br>N  | Exportin-2 OS=Homo sapiens GN=CSE1L PE=1 SV=3                                          | 0.03<br>173<br>2 | -<br>0.61<br>184 | Yes |
| NUCL_<br>HUMA<br>N  | Nucleolin OS=Homo sapiens GN=NCL PE=1 SV=3                                             | 0.03<br>295<br>8 | -<br>0.61<br>194 | Yes |
| P5CS_H<br>UMAN      | Delta-1-pyrroline-5-carboxylate synthase OS=Homo sapiens GN=ALDH18A1 PE=1 SV=2         | 0.03<br>169<br>4 | -<br>0.61<br>752 | Yes |
| RM46_<br>HUMA<br>N  | 39S ribosomal protein L46, mitochondrial OS=Homo sapiens GN=MRPL46 PE=1 SV=1           | 0.03<br>689<br>3 | -<br>0.61<br>879 | Yes |
| XRCC5_<br>HUM<br>AN | X-ray repair cross-complementing protein 5 OS=Homo sapiens GN=XRCC5 PE=1 SV=3          | 0.01<br>919<br>2 | -<br>0.62<br>6   | Yes |
| EDF1_<br>HUMA<br>N  | Endothelial differentiation-related factor 1 OS=Homo sapiens GN=EDF1 PE=1 SV=1         | 0.03<br>820<br>3 | -<br>0.63<br>267 | Yes |
| RBM14_<br>HUM<br>AN | RNA-binding protein 14 OS=Homo sapiens GN=RBM14 PE=1 SV=2                              | 0.03<br>850<br>6 | -<br>0.67<br>135 | Yes |
| TMED9_<br>HUM<br>AN | Transmembrane emp24 domain-containing protein 9 OS=Homo sapiens GN=TMED9 PE=1 SV=2     | 0.04<br>315<br>7 | -<br>0.68<br>788 | Yes |
| PYC_H<br>UMAN       | Pyruvate carboxylase, mitochondrial OS=Homo sapiens GN=PC PE=1 SV=2                    | 0.01<br>905<br>2 | -<br>0.68<br>939 | Yes |
| PCCA_<br>HUMA<br>N  | Propionyl-CoA carboxylase alpha chain, mitochondrial OS=Homo sapiens GN=PCCA PE=1 SV=4 | 0.03<br>211<br>1 | -<br>0.72<br>243 | Yes |
| RS15_H<br>UMAN      | 40S ribosomal protein S15 OS=Homo sapiens GN=RPS15 PE=1 SV=2                           | 0.00<br>384<br>9 | -<br>0.73<br>81  | Yes |
| HMGB1_<br>HUM<br>AN | High mobility group protein B1 OS=Homo sapiens GN=HMGB1 PE=1 SV=3                      | 0.03<br>186<br>6 | -<br>0.77<br>292 | Yes |
| CCAR2_<br>HUM<br>AN | Cell cycle and apoptosis regulator protein 2 OS=Homo sapiens GN=CCAR2 PE=1 SV=2        | 0.00<br>652<br>4 | -<br>0.80<br>729 | Yes |
| RS13_H<br>UMAN      | 40S ribosomal protein S13 OS=Homo sapiens GN=RPS13 PE=1 SV=2                           | 0.00<br>152      | -<br>0.82<br>216 | Yes |
| PARP1_<br>HUMA<br>N | Poly [ADP-ribose] polymerase 1 OS=Homo sapiens GN=PARP1 PE=1 SV=4                      | 0.04<br>450<br>4 | -<br>0.82<br>53  | Yes |

|             |                                                                                              |          |          |     |
|-------------|----------------------------------------------------------------------------------------------|----------|----------|-----|
| RL14_HUMAN  | 60S ribosomal protein L14 OS=Homo sapiens GN=RPL14 PE=1 SV=4                                 | 0.01761  | -0.82709 | Yes |
| MYH10_HUMAN | Myosin-10 OS=Homo sapiens GN=MYH10 PE=1 SV=3                                                 | 0.02264  | -0.83698 | Yes |
| MBB1A_HUMAN | Myb-binding protein 1A OS=Homo sapiens GN=MYBBP1A PE=1 SV=2                                  | 0.031028 | -0.85574 | Yes |
| PA2G4_HUMAN | Proliferation-associated protein 2G4 OS=Homo sapiens GN=PA2G4 PE=1 SV=3                      | 0.004415 | -0.86517 | Yes |
| LMNB2_HUMAN | Lamin-B2 OS=Homo sapiens GN=LMNB2 PE=1 SV=4                                                  | 0.02222  | -0.86891 | Yes |
| LAP2B_HUMAN | Lamina-associated polypeptide 2, isoforms beta/gamma OS=Homo sapiens GN=TMPO PE=1 SV=2       | 0.017526 | -0.89181 | Yes |
| API5_HUMAN  | Apoptosis inhibitor 5 OS=Homo sapiens OX=9606 GN=API5 PE=1 SV=3                              | 0.049423 | -0.92633 | Yes |
| DLRB1_HUMAN | Dynein light chain roadblock-type 1 OS=Homo sapiens GN=DYNLRB1 PE=1 SV=3                     | 0.023623 | -0.93103 | Yes |
| SSBP_HUMAN  | Single-stranded DNA-binding protein, mitochondrial OS=Homo sapiens GN=SSBP1 PE=1 SV=1        | 0.012749 | -0.94265 | Yes |
| MMRN2_HUMAN | Multimerin-2 OS=Homo sapiens GN=MMRN2 PE=1 SV=2                                              | 0.001236 | -0.99449 | Yes |
| SF01_HUMAN  | Splicing factor 1 OS=Homo sapiens GN=SF1 PE=1 SV=4                                           | 0.010463 | -0.99629 | Yes |
| TCRG1_HUMAN | Transcription elongation regulator 1 OS=Homo sapiens OX=9606 GN=TCERG1 PE=1 SV=2             | 0.049238 | -1.08177 | Yes |
| RIF1_HUMAN  | Telomere-associated protein RIF1 OS=Homo sapiens GN=RIF1 PE=1 SV=2                           | 0.021716 | -1.08998 | Yes |
| LPPRC_HUMAN | Leucine-rich PPR motif-containing protein, mitochondrial OS=Homo sapiens GN=LRPPRC PE=1 SV=3 | 0.008557 | -1.10091 | Yes |
| RLA0_HUMAN  | 60S acidic ribosomal protein P0 OS=Homo sapiens GN=RPLP0 PE=1 SV=1                           | 0.001187 | -1.11269 | Yes |
| SF3A3_HUMAN | Splicing factor 3A subunit 3 OS=Homo sapiens GN=SF3A3 PE=1 SV=1                              | 0.011005 | -1.11859 | Yes |
| HP1B3_HUMAN | Heterochromatin protein 1-binding protein 3 OS=Homo sapiens GN=HP1BP3 PE=1 SV=1              | 0.011123 | -1.12856 | Yes |
| PCCB_HUMAN  | Propionyl-CoA carboxylase beta chain, mitochondrial OS=Homo sapiens GN=PCCB PE=1 SV=3        | 0.039361 | -1.14091 | Yes |

|             |                                                                                                   |          |          |     |
|-------------|---------------------------------------------------------------------------------------------------|----------|----------|-----|
| PSPC1_HUMAN | Paraspeckle component 1 OS=Homo sapiens GN=PSPC1 PE=1 SV=1                                        | 0.011181 | -1.14563 | Yes |
| XPP1_HUMAN  | Xaa-Pro aminopeptidase 1 OS=Homo sapiens GN=XPNPEP1 PE=1 SV=3                                     | 0.029418 | -1.176   | Yes |
| RS28_HUMAN  | 40S ribosomal protein S28 OS=Homo sapiens GN=RPS28 PE=1 SV=1                                      | 0.004536 | -1.18886 | Yes |
| CALM1_HUMAN | Calmodulin-1 OS=Homo sapiens OX=9606 GN=CALM1 PE=1 SV=1                                           | 0.030934 | -1.22252 | Yes |
| ILF2_HUMAN  | Interleukin enhancer-binding factor 2 OS=Homo sapiens GN=ILF2 PE=1 SV=2                           | 0.044712 | -1.29551 | Yes |
| SERF2_HUMAN | Small EDRK-rich factor 2 OS=Homo sapiens GN=SERF2 PE=1 SV=1                                       | 0.017007 | -1.30631 | Yes |
| NUCB2_HUMAN | Nucleobindin-2 OS=Homo sapiens GN=NUCB2 PE=1 SV=2                                                 | 0.036433 | -1.32828 | Yes |
| TOP1_HUMAN  | DNA topoisomerase 1 OS=Homo sapiens GN=TOP1 PE=1 SV=2                                             | 0.017479 | -1.38669 | Yes |
| NUCB1_HUMAN | Nucleobindin-1 OS=Homo sapiens GN=NUCB1 PE=1 SV=4                                                 | 0.015536 | -1.4122  | Yes |
| RALY_HUMAN  | RNA-binding protein Raly OS=Homo sapiens GN=RALY PE=1 SV=1                                        | 0.033095 | -1.45339 | Yes |
| ODPB_HUMAN  | Pyruvate dehydrogenase E1 component subunit beta, mitochondrial OS=Homo sapiens GN=PDHB PE=1 SV=3 | 0.003098 | -1.51329 | Yes |
| DENR_HUMAN  | Density-regulated protein OS=Homo sapiens GN=DENR PE=1 SV=2                                       | 0.034756 | -1.57545 | Yes |
| RBM28_HUMAN | RNA-binding protein 28 OS=Homo sapiens GN=RBM28 PE=1 SV=3                                         | 0.02148  | -1.60581 | Yes |
| RBMX_HUMAN  | RNA-binding motif protein, X chromosome OS=Homo sapiens GN=RBMX PE=1 SV=3                         | 0.001063 | -1.64263 | Yes |
| RM16_HUMAN  | 39S ribosomal protein L16, mitochondrial OS=Homo sapiens OX=9606 GN=MRPL16 PE=1 SV=1              | 0.033157 | -1.68577 | Yes |
| SMAD2_HUMAN | Mothers against decapentaplegic homolog 2 OS=Homo sapiens GN=SMAD2 PE=1 SV=1                      | 0.019166 | -1.70475 | Yes |
| AN32E_HUMAN | Acidic leucine-rich nuclear phosphoprotein 32 family member E OS=Homo sapiens GN=ANP32E PE=1 SV=1 | 0.033821 | -1.8346  | Yes |
| LEO1_HUMAN  | RNA polymerase-associated protein LEO1 OS=Homo sapiens OX=9606 GN=LEO1 PE=1 SV=1                  | 0.041305 | -1.89831 | Yes |



|             |                                                                                                                                            |          |          |     |
|-------------|--------------------------------------------------------------------------------------------------------------------------------------------|----------|----------|-----|
| CAD13_HUMAN | Cadherin-13 OS=Homo sapiens OX=9606 GN=CDH13 PE=1 SV=1                                                                                     | 0.030347 | -2.11156 | Yes |
| BTF3_HUMAN  | Transcription factor BTF3 OS=Homo sapiens GN=BTF3 PE=1 SV=1                                                                                | 0.00404  | -2.12886 | Yes |
| RL27_HUMAN  | 60S ribosomal protein L27 OS=Homo sapiens GN=RPL27 PE=1 SV=2                                                                               | 0.000658 | -2.21173 | Yes |
| SURF6_HUMAN | Surfeit locus protein 6 OS=Homo sapiens OX=9606 GN=SURF6 PE=1 SV=3                                                                         | 0.007573 | -2.26209 | Yes |
| TRA2A_HUMAN | Transformer-2 protein homolog alpha OS=Homo sapiens OX=9606 GN=TRA2A PE=1 SV=1                                                             | 0.038378 | -2.27895 | Yes |
| CTBL1_HUMAN | Beta-catenin-like protein 1 OS=Homo sapiens OX=9606 GN=CTNNBL1 PE=1 SV=1                                                                   | 0.019881 | -2.33016 | Yes |
| CE024_HUMAN | UPF0461 protein C5orf24 OS=Homo sapiens OX=9606 GN=C5orf24 PE=1 SV=1                                                                       | 0.037417 | -2.43555 | Yes |
| TGFB1_HUMAN | Transforming growth factor beta-1 proprotein OS=Homo sapiens OX=9606 GN=TGFB1 PE=1 SV=2                                                    | 0.035173 | -2.51089 | Yes |
| H2A1B_HUMAN | Histone H2A type 1-B/E OS=Homo sapiens GN=HIST1H2AB PE=1 SV=2                                                                              | 0.047074 | -2.53512 | Yes |
| MYH11_HUMAN | Myosin-11 OS=Homo sapiens GN=MYH11 PE=1 SV=3                                                                                               | 0.00049  | -2.57962 | Yes |
| CXCR4_HUMAN | C-X-C chemokine receptor type 4 OS=Homo sapiens OX=9606 GN=CXCR4 PE=1 SV=1                                                                 | 0.004005 | -2.71287 | Yes |
| SMHD1_HUMAN | Structural maintenance of chromosomes flexible hinge domain-containing protein 1 OS=Homo sapiens GN=SMCHD1 PE=1 SV=2                       | 0.015009 | -2.81817 | Yes |
| CATZ_HUMAN  | Cathepsin Z OS=Homo sapiens GN=CTSZ PE=1 SV=1                                                                                              | 0.035948 | -2.89048 | Yes |
| KDM5D_HUMAN | Lysine-specific demethylase 5D OS=Homo sapiens OX=9606 GN=KDM5D PE=1 SV=2                                                                  | 0.024242 | -3.286   | Yes |
| HSDL2_HUMAN | Hydroxysteroid dehydrogenase-like protein 2 OS=Homo sapiens OX=9606 GN=HSDL2 PE=1 SV=1                                                     | 0.039538 | -3.50625 | Yes |
| ODP2_HUMAN  | Dihydrolipoyllysine-residue acetyltransferase component of pyruvate dehydrogenase complex, mitochondrial OS=Homo sapiens GN=DLAT PE=1 SV=3 | 0.001092 | -3.80845 | Yes |
| MAST1_HUMAN | Microtubule-associated serine/threonine-protein kinase 1 OS=Homo sapiens OX=9606 GN=MAST1 PE=1 SV=2                                        | 0.003993 | -4.01896 | Yes |
| CLPX_HUMAN  | ATP-dependent Clp protease ATP-binding subunit clpX-like, mitochondrial OS=Homo sapiens GN=CLPX PE=1 SV=2                                  | 0.024369 | -4.30114 | Yes |

|                    |                                                                                                            |                  |                  |     |
|--------------------|------------------------------------------------------------------------------------------------------------|------------------|------------------|-----|
| GBB1_<br>HUMA<br>N | Guanine nucleotide-binding protein G(I)/G(S)/G(T) subunit beta-1 OS=Homo sapiens OX=9606 GN=GNB1 PE=1 SV=3 | 0.03<br>172<br>9 | -<br>4.64<br>567 | Yes |
| BRX1_<br>HUMA<br>N | Ribosome biogenesis protein BRX1 homolog OS=Homo sapiens GN=BRX1 PE=1 SV=2                                 | 0.03<br>55       | -<br>6.25<br>55  | Yes |



**Table S4. Full list of genes and accession codes for targets in siRNA subscreen**

LP\_59984

G-CUSTOM-429983

| Plate   | Well | Pool Catalog Number | Duplicate Catalog Number | Gene Symbol | GENE ID | Gene Accession | GI Number | Sequence             |
|---------|------|---------------------|--------------------------|-------------|---------|----------------|-----------|----------------------|
| Plate 1 | A01  | E-010347-00         | A-010347-14              | DIAPH1      | 1729    | NM_001079812   | 119395759 | GUGUUGGAUUCAAAGACAG  |
| Plate 1 | A01  | E-010347-00         | A-010347-15              | DIAPH1      | 1729    | NM_001079812   | 119395759 | UGGUUAUUUAUUAAUAGUG  |
| Plate 1 | A01  | E-010347-00         | A-010347-16              | DIAPH1      | 1729    | NM_001079812   | 119395759 | GCUUUUGGCUUCAUAUCA   |
| Plate 1 | A01  | E-010347-00         | A-010347-17              | DIAPH1      | 1729    | NM_001079812   | 119395759 | GCAUGGAGAUGGAUGACUU  |
| Plate 1 | A02  | E-012029-00         | A-012029-13              | DIAPH2      | 1730    | NM_007309      | 115527114 | UUAUGAGCUUGAUUUUCGA  |
| Plate 1 | A02  | E-012029-00         | A-012029-14              | DIAPH2      | 1730    | NM_007309      | 115527114 | CUACCAUCUUCUAUAUAAU  |
| Plate 1 | A02  | E-012029-00         | A-012029-15              | DIAPH2      | 1730    | NM_007309      | 115527114 | CUUUUAGAGUUAGUUCUUC  |
| Plate 1 | A02  | E-012029-00         | A-012029-16              | DIAPH2      | 1730    | NM_007309      | 115527114 | CGAUUUAAUCUCAUCUGAUA |
| Plate 1 | A03  | E-018997-00         | A-018997-13              | DIAPH3      | 81624   | NM_030932      | 110225345 | CUACAAGCUUUUAAGUCUC  |
| Plate 1 | A03  | E-018997-00         | A-018997-14              | DIAPH3      | 81624   | NM_030932      | 110225345 | GGAUUUGCUUUGUAAACUU  |

|         |     |                 |                 |        |       |           |               |                         |
|---------|-----|-----------------|-----------------|--------|-------|-----------|---------------|-------------------------|
| Plate 1 | A03 | E-01899<br>7-00 | A-01899<br>7-15 | DIAPH3 | 81624 | NM_030932 | 1102253<br>45 | GCGUUUAAUAGAAAU<br>GAAG |
| Plate 1 | A03 | E-01899<br>7-00 | A-01899<br>7-16 | DIAPH3 | 81624 | NM_030932 | 1102253<br>45 | CUGAUUACUGAAUU<br>UUGU  |
| Plate 1 | A04 | E-01292<br>5-00 | A-01292<br>5-13 | DAAM1  | 23002 | NM_014992 | 2107107<br>6  | CUACUAGAUAGAAUU<br>AUAC |
| Plate 1 | A04 | E-01292<br>5-00 | A-01292<br>5-14 | DAAM1  | 23002 | NM_014992 | 2107107<br>6  | CUAUGAAUUUCUGAU<br>GUUA |
| Plate 1 | A04 | E-01292<br>5-00 | A-01292<br>5-15 | DAAM1  | 23002 | NM_014992 | 2107107<br>6  | UUGGAAAACUUUAAU<br>AUUA |
| Plate 1 | A04 | E-01292<br>5-00 | A-01292<br>5-16 | DAAM1  | 23002 | NM_014992 | 2107107<br>6  | CUAUCGAGGUUGAAA<br>UUAU |
| Plate 1 | A05 | E-01401<br>0-00 | A-01401<br>0-13 | DAAM2  | 23500 | NM_015345 | 4054841<br>4  | CCCAGAUGUUUGAGU<br>UGAU |
| Plate 1 | A05 | E-01401<br>0-00 | A-01401<br>0-14 | DAAM2  | 23500 | NM_015345 | 4054841<br>4  | CCUGCAUGUCUUAAGU<br>AUC |
| Plate 1 | A05 | E-01401<br>0-00 | A-01401<br>0-15 | DAAM2  | 23500 | NM_015345 | 4054841<br>4  | CCAGCAUGUGCGUUGG<br>UUU |
| Plate 1 | A05 | E-01401<br>0-00 | A-01401<br>0-16 | DAAM2  | 23500 | NM_015345 | 4054841<br>4  | CUGCCACCUUUAGUA<br>AGU  |
| Plate 1 | A06 | E-01917<br>6-00 | A-01917<br>6-13 | FMNL1  | 752   | NM_005892 | 3335614<br>7  | CUGUGAUCAGGAGCG<br>GUUU |
| Plate 1 | A06 | E-01917<br>6-00 | A-01917<br>6-14 | FMNL1  | 752   | NM_005892 | 3335614<br>7  | CUGUUGGAGAUGAAG<br>UCGA |

|         |     |             |             |       |        |           |           |                      |
|---------|-----|-------------|-------------|-------|--------|-----------|-----------|----------------------|
| Plate 1 | A06 | E-019176-00 | A-019176-15 | FMNL1 | 752    | NM_005892 | 33356147  | CGUCCACGUCUGUAUUAUG  |
| Plate 1 | A06 | E-019176-00 | A-019176-16 | FMNL1 | 752    | NM_005892 | 33356147  | GGUAGCAGCUGAUUGGAUG  |
| Plate 1 | A07 | E-031993-00 | A-031993-13 | FMNL2 | 114793 | NM_052905 | 94421465  | CCAUCGUGCUGAAUGCUAU  |
| Plate 1 | A07 | E-031993-00 | A-031993-14 | FMNL2 | 114793 | NM_052905 | 94421465  | CAAGGGACCAUUAAA AUUC |
| Plate 1 | A07 | E-031993-00 | A-031993-15 | FMNL2 | 114793 | NM_052905 | 94421465  | GCAUCUGUCUCUAUAAAGU  |
| Plate 1 | A07 | E-031993-00 | A-031993-16 | FMNL2 | 114793 | NM_052905 | 94421465  | CCCUUUUCCUUGGAUGUGU  |
| Plate 1 | A08 | E-019007-00 | A-019007-13 | FMNL3 | 91010  | NM_198900 | 119120860 | UCCUGGUUUUAAAAU GUUA |
| Plate 1 | A08 | E-019007-00 | A-019007-14 | FMNL3 | 91010  | NM_198900 | 119120860 | CUAGUAUCCUAAUUU UACA |
| Plate 1 | A08 | E-019007-00 | A-019007-15 | FMNL3 | 91010  | NM_198900 | 119120860 | GCAUUAGAAACCAAG UUAU |
| Plate 1 | A08 | E-019007-00 | A-019007-16 | FMNL3 | 91010  | NM_198900 | 119120860 | GUUUUAUCCUUAUCA AUAG |
| Plate 1 | A09 | E-013709-00 | A-013709-13 | FHOD1 | 29109  | NM_013241 | 118572598 | UGUUGGUGUUUGUAG AAUA |
| Plate 1 | A09 | E-013709-00 | A-013709-14 | FHOD1 | 29109  | NM_013241 | 118572598 | CGCUCAAGUUGGAGG AUUG |

|         |     |             |             |         |        |              |           |                         |
|---------|-----|-------------|-------------|---------|--------|--------------|-----------|-------------------------|
| Plate 1 | A09 | E-013709-00 | A-013709-15 | FHOD1   | 29109  | NM_013241    | 118572598 | GCAAUAGGUCCAUGC<br>CUU  |
| Plate 1 | A09 | E-013709-00 | A-013709-16 | FHOD1   | 29109  | NM_013241    | 118572598 | GUAUUAGCCGUGUGU<br>GUAU |
| Plate 1 | A10 | E-023411-00 | A-023411-13 | FHOD3   | 80206  | NM_025135    | 58331241  | UUUUGAAUUUUGAUG<br>AGUA |
| Plate 1 | A10 | E-023411-00 | A-023411-14 | FHOD3   | 80206  | NM_025135    | 58331241  | CUGUGACACUCAUAGG<br>UUA |
| Plate 1 | A10 | E-023411-00 | A-023411-15 | FHOD3   | 80206  | NM_025135    | 58331241  | CCCUGGUAAUUUAUU<br>GGUU |
| Plate 1 | A10 | E-023411-00 | A-023411-16 | FHOD3   | 80206  | NM_025135    | 58331241  | UGCUCGUCUUUGUAG<br>AGUA |
| Plate 1 | A11 | E-029054-00 | A-029054-17 | GRID2IP | 392862 | NM_001145118 | 223278402 | CCCUCAUCGUUGACGU<br>CUA |
| Plate 1 | A11 | E-029054-00 | A-029054-18 | GRID2IP | 392862 | NM_001145118 | 223278402 | CUAGCGAGGACAAGU<br>UUGC |
| Plate 1 | A11 | E-029054-00 | A-029054-19 | GRID2IP | 392862 | NM_001145118 | 223278402 | GGAUGAUCUGGUGUG<br>GACU |
| Plate 1 | A11 | E-029054-00 | A-029054-20 | GRID2IP | 392862 | NM_001145118 | 223278402 | CUGUCAGGAGAAAAU<br>CGCA |
| Plate 1 | A12 | E-030385-00 | A-030385-09 | FMN1    | 342184 | XM_943337    | 113425565 | GGAUUAAUCUGGUGG<br>ACUA |
| Plate 1 | A12 | E-030385-00 | A-030385-10 | FMN1    | 342184 | XM_943337    | 113425565 | GUACGAUAAUUUGGG<br>AUGA |



|         |         |                     |                     |       |        |           |               |                           |
|---------|---------|---------------------|---------------------|-------|--------|-----------|---------------|---------------------------|
| Plate 1 | A1<br>2 | E-<br>03038<br>5-00 | A-<br>03038<br>5-11 | FMN1  | 342184 | XM_943337 | 1134255<br>65 | CCAUGAAGCCUUUAUA<br>UUG   |
| Plate 1 | A1<br>2 | E-<br>03038<br>5-00 | A-<br>03038<br>5-12 | FMN1  | 342184 | XM_943337 | 1134255<br>65 | GGAUUAUAGCUUAGAA<br>AUUC  |
| Plate 1 | B0<br>1 | E-<br>02213<br>4-00 | A-<br>02213<br>4-13 | FMN2  | 56776  | NM_020066 | 7413655<br>3  | GUUGGAAUACUAAUG<br>UCUA   |
| Plate 1 | B0<br>1 | E-<br>02213<br>4-00 | A-<br>02213<br>4-14 | FMN2  | 56776  | NM_020066 | 7413655<br>3  | GCAUUGUGAUGGUUU<br>UGUA   |
| Plate 1 | B0<br>1 | E-<br>02213<br>4-00 | A-<br>02213<br>4-15 | FMN2  | 56776  | NM_020066 | 7413655<br>3  | GUAUCAGUUUCAUGU<br>CUAA   |
| Plate 1 | B0<br>1 | E-<br>02213<br>4-00 | A-<br>02213<br>4-16 | FMN2  | 56776  | NM_020066 | 7413655<br>3  | GUAUUUAUCUCCGAAA<br>UUUU  |
| Plate 1 | B0<br>2 | E-<br>01241<br>6-00 | A-<br>01241<br>6-13 | LMOD1 | 25802  | NM_012134 | 1123806<br>29 | GCUAGAUGCUUUAGG<br>UUGC   |
| Plate 1 | B0<br>2 | E-<br>01241<br>6-00 | A-<br>01241<br>6-14 | LMOD1 | 25802  | NM_012134 | 1123806<br>29 | CCAUCAUGCUCUAAAGGC<br>CAA |
| Plate 1 | B0<br>2 | E-<br>01241<br>6-00 | A-<br>01241<br>6-15 | LMOD1 | 25802  | NM_012134 | 1123806<br>29 | CCAUAAGAUUUUGAU<br>AAUA   |
| Plate 1 | B0<br>2 | E-<br>01241<br>6-00 | A-<br>01241<br>6-16 | LMOD1 | 25802  | NM_012134 | 1123806<br>29 | CUGUGAUCCAGGAAA<br>GAUG   |
| Plate 1 | B0<br>3 | E-<br>03486<br>9-00 | A-<br>03486<br>9-13 | LMOD2 | 442721 | XM_499467 | 1134197<br>72 | CUCUAAGCCAAAGAU<br>UUU    |
| Plate 1 | B0<br>3 | E-<br>03486<br>9-00 | A-<br>03486<br>9-14 | LMOD2 | 442721 | XM_499467 | 1134197<br>72 | GCUUUGGACAAGAUU<br>AAAA   |

|         |     |             |             |        |        |           |           |                     |
|---------|-----|-------------|-------------|--------|--------|-----------|-----------|---------------------|
| Plate 1 | B03 | E-034869-00 | A-034869-15 | LMOD2  | 442721 | XM_499467 | 113419772 | CCAAGAAUGAGCAUGACGA |
| Plate 1 | B03 | E-034869-00 | A-034869-16 | LMOD2  | 442721 | XM_499467 | 113419772 | GGACUCAGUAAAUAUGAAU |
| Plate 1 | B04 | E-023261-00 | A-023261-13 | LMOD3  | 56203  | NM_198271 | 54607115  | CCUUGGUGUUUUGGAGUAU |
| Plate 1 | B04 | E-023261-00 | A-023261-14 | LMOD3  | 56203  | NM_198271 | 54607115  | UCUUGUUGAUUAUAUGUAU |
| Plate 1 | B04 | E-023261-00 | A-023261-15 | LMOD3  | 56203  | NM_198271 | 54607115  | CUAGAGGCCUUAUAUAUUC |
| Plate 1 | B04 | E-023261-00 | A-023261-16 | LMOD3  | 56203  | NM_198271 | 54607115  | UUAGUAUGUACAAAAUAU  |
| Plate 1 | B05 | E-020477-00 | A-020477-13 | COBLL1 | 22837  | NM_014900 | 62821786  | UCAGAAACCAUAGAGUAUA |
| Plate 1 | B05 | E-020477-00 | A-020477-14 | COBLL1 | 22837  | NM_014900 | 62821786  | GUAACAGUUUUGAUGGGAA |
| Plate 1 | B05 | E-020477-00 | A-020477-15 | COBLL1 | 22837  | NM_014900 | 62821786  | CACUCAUGCUUAAGUUCAC |
| Plate 1 | B05 | E-020477-00 | A-020477-16 | COBLL1 | 22837  | NM_014900 | 62821786  | GUAUAAGAUUCAUAGACUU |
| Plate 1 | B06 | E-012003-00 | A-012003-15 | PFN1   | 5216   | NM_005022 | 16753213  | UUAGCAUGGAUCUUCGUAC |
| Plate 1 | B06 | E-012003-00 | A-012003-16 | PFN1   | 5216   | NM_005022 | 16753213  | CCAGAAAUGUUCGGUGAUC |

|         |     |             |             |      |      |              |           |                     |
|---------|-----|-------------|-------------|------|------|--------------|-----------|---------------------|
| Plate 1 | B06 | E-012003-00 | A-012003-17 | PFN1 | 5216 | NM_005022    | 16753213  | GUGGUUGAUCAACAAGAA  |
| Plate 1 | B06 | E-012003-00 | A-012003-18 | PFN1 | 5216 | NM_005022    | 16753213  | CGUGUGUGGUUGGAAACU  |
| Plate 1 | B07 | E-011750-00 | A-011750-13 | PFN2 | 5217 | NM_002628    | 94538347  | CCAAUAGAAAUAGAUAGA  |
| Plate 1 | B07 | E-011750-00 | A-011750-14 | PFN2 | 5217 | NM_002628    | 94538347  | GUAUUUGCUUCUAUUGUU  |
| Plate 1 | B07 | E-011750-00 | A-011750-15 | PFN2 | 5217 | NM_002628    | 94538347  | GGAUAAUGUACAGAUUAA  |
| Plate 1 | B07 | E-011750-00 | A-011750-16 | PFN2 | 5217 | NM_002628    | 94538347  | CCUUUAUUCAUAGUGUCUA |
| Plate 1 | B08 | E-008395-00 | A-008395-19 | RHOB | 388  | NM_004040    | 42716309  | CUAGAAGUGAAAAUUGUUC |
| Plate 1 | B08 | E-008395-00 | A-008395-20 | RHOB | 388  | NM_004040    | 42716309  | GUAAAAUUAUAAAAGACUA |
| Plate 1 | B08 | E-008395-00 | A-008395-21 | RHOB | 388  | NM_004040    | 42716309  | UGAUGUUAUUUGAUUUAUU |
| Plate 1 | B08 | E-008395-00 | A-008395-22 | RHOB | 388  | NM_004040    | 42716309  | UGGUGAGCUUAUGAUGUU  |
| Plate 1 | B09 | E-008555-00 | A-008555-13 | RHOC | 389  | NM_001042679 | 111494250 | GUCUUUGAGAACUAUAUUG |
| Plate 1 | B09 | E-008555-00 | A-008555-14 | RHOC | 389  | NM_001042679 | 111494250 | CAGGGGUACAGAAAUUAUC |

|         |     |             |             |       |       |              |           |                     |
|---------|-----|-------------|-------------|-------|-------|--------------|-----------|---------------------|
| Plate 1 | B09 | E-008555-00 | A-008555-15 | RHOC  | 389   | NM_001042679 | 111494250 | CCUUUGGCUACCUUGAGUG |
| Plate 1 | B09 | E-008555-00 | A-008555-16 | RHOC  | 389   | NM_001042679 | 111494250 | UCAGCAAGGAUCAGUUUCC |
| Plate 1 | B10 | E-013443-00 | A-013443-13 | SEPT1 | 1731  | NM_052838    | 22209006  | GGUUUUGACUUCACGCUAA |
| Plate 1 | B10 | E-013443-00 | A-013443-14 | SEPT1 | 1731  | NM_052838    | 22209006  | GCAGUACACGAGAAAGUCA |
| Plate 1 | B10 | E-013443-00 | A-013443-15 | SEPT1 | 1731  | NM_052838    | 22209006  | UCAUCGAGGAGCAAUUUGA |
| Plate 1 | B10 | E-013443-00 | A-013443-16 | SEPT1 | 1731  | NM_052838    | 22209006  | GCGUAGAGAUUGAGGAAGG |
| Plate 1 | B11 | E-017317-00 | A-017317-13 | SEPT3 | 55964 | NM_145733    | 22035571  | GUUGCAUCCUCCAUUUAUC |
| Plate 1 | B11 | E-017317-00 | A-017317-14 | SEPT3 | 55964 | NM_145733    | 22035571  | CCUUCAUUACUAAAAGAUA |
| Plate 1 | B11 | E-017317-00 | A-017317-15 | SEPT3 | 55964 | NM_145733    | 22035571  | CCAUGAAGACCGGUUUCGA |
| Plate 1 | B11 | E-017317-00 | A-017317-16 | SEPT3 | 55964 | NM_145733    | 22035571  | GAUGCAUGAAUGUUUGCGA |
| Plate 1 | B12 | E-011886-00 | A-011886-13 | SEPT4 | 5414  | NM_080416    | 17986246  | CUUUCAGCCCUGGAUUUU  |
| Plate 1 | B12 | E-011886-00 | A-011886-14 | SEPT4 | 5414  | NM_080416    | 17986246  | GGACAAUGCUGGUACGUAC |

|         |     |             |             |       |       |              |          |                         |
|---------|-----|-------------|-------------|-------|-------|--------------|----------|-------------------------|
| Plate 1 | B12 | E-011886-00 | A-011886-15 | SEPT4 | 5414  | NM_080416    | 17986246 | GUUUGAGCAGUAUUU<br>CCGA |
| Plate 1 | B12 | E-011886-00 | A-011886-16 | SEPT4 | 5414  | NM_080416    | 17986246 | GCUUGAUCCCUAUGAU<br>UCC |
| Plate 1 | C01 | E-013234-00 | A-013234-13 | SEPT5 | 5413  | NM_002688    | 90193629 | UUAUCAGGAUGAAGG<br>AUGA |
| Plate 1 | C01 | E-013234-00 | A-013234-14 | SEPT5 | 5413  | NM_002688    | 90193629 | CCGUUUUCUCCGUUG<br>UGA  |
| Plate 1 | C01 | E-013234-00 | A-013234-15 | SEPT5 | 5413  | NM_002688    | 90193629 | CAGCUGACCCUAAUUU<br>AUU |
| Plate 1 | C01 | E-013234-00 | A-013234-16 | SEPT5 | 5413  | NM_002688    | 90193629 | UCAUUGUGUCUGUUU<br>CCGA |
| Plate 1 | C02 | E-019260-00 | A-019260-13 | SEPT6 | 23157 | NM_145802    | 33624820 | GCUGUAAGCUGGAGG<br>AGAU |
| Plate 1 | C02 | E-019260-00 | A-019260-14 | SEPT6 | 23157 | NM_145802    | 33624820 | CUAAAGCUCACGAUCG<br>UUA |
| Plate 1 | C02 | E-019260-00 | A-019260-15 | SEPT6 | 23157 | NM_145802    | 33624820 | UCGUGGAAUUCAUCG<br>AUGC |
| Plate 1 | C02 | E-019260-00 | A-019260-16 | SEPT6 | 23157 | NM_145802    | 33624820 | UGUGCAGGUUGAAAA<br>CGAG |
| Plate 1 | C03 | E-011607-00 | A-011607-13 | SEPT7 | 989   | NM_001011553 | 58535460 | GUAGGAACCAACAAG<br>GAAA |
| Plate 1 | C03 | E-011607-00 | A-011607-14 | SEPT7 | 989   | NM_001011553 | 58535460 | CUAUUGACCACCAGUU<br>AAC |

|         |     |             |             |        |        |              |           |                      |
|---------|-----|-------------|-------------|--------|--------|--------------|-----------|----------------------|
| Plate 1 | C03 | E-011607-00 | A-011607-15 | SEPT7  | 989    | NM_001011553 | 58535460  | CUAGGGUGUUCUGUACUUA  |
| Plate 1 | C03 | E-011607-00 | A-011607-16 | SEPT7  | 989    | NM_001011553 | 58535460  | GCUGUAUUCAUUAUUAUGCA |
| Plate 1 | C04 | E-010647-00 | A-010647-15 | SEPT8  | 23176  | NM_001098811 | 149363688 | UCAAUAAGGAUGAGAGUUA  |
| Plate 1 | C04 | E-010647-00 | A-010647-16 | SEPT8  | 23176  | NM_001098811 | 149363688 | UGCGCAGUUUGAAAAUUUAU |
| Plate 1 | C04 | E-010647-00 | A-010647-17 | SEPT8  | 23176  | NM_001098811 | 149363688 | UCCACAAGUUCAAGAUCAA  |
| Plate 1 | C04 | E-010647-00 | A-010647-18 | SEPT8  | 23176  | NM_001098811 | 149363688 | GGCUGUUGCAGAGAUUAAC  |
| Plate 1 | C05 | E-017363-00 | A-017363-13 | SEPT10 | 151011 | NM_178584    | 30795192  | GCAUUUAACCAAAGAGCGA  |
| Plate 1 | C05 | E-017363-00 | A-017363-14 | SEPT10 | 151011 | NM_178584    | 30795192  | CUUUUGUGUCAGAUUAUUU  |
| Plate 1 | C05 | E-017363-00 | A-017363-15 | SEPT10 | 151011 | NM_178584    | 30795192  | CGUUCAUUUAAUUUAUGUAU |
| Plate 1 | C05 | E-017363-00 | A-017363-16 | SEPT10 | 151011 | NM_178584    | 30795192  | GAAUGAUACUACAAGUUGA  |
| Plate 1 | C06 | E-020249-00 | A-020249-13 | SEPT11 | 55752  | NM_018243    | 38605734  | GUCUACUUCUCAAGGAUUC  |
| Plate 1 | C06 | E-020249-00 | A-020249-14 | SEPT11 | 55752  | NM_018243    | 38605734  | CCCUCAAUUCUAAUUGGAU  |

|         |     |                 |                 |              |        |           |               |                         |
|---------|-----|-----------------|-----------------|--------------|--------|-----------|---------------|-------------------------|
| Plate 1 | C06 | E-02024<br>9-00 | A-02024<br>9-15 | SEPT11       | 55752  | NM_018243 | 3860573<br>4  | GGUUAGAGAUUAAGU<br>AAAU |
| Plate 1 | C06 | E-02024<br>9-00 | A-02024<br>9-16 | SEPT11       | 55752  | NM_018243 | 3860573<br>4  | GCAGAAUUGUCAUAU<br>AUGU |
| Plate 1 | C07 | E-01622<br>7-00 | A-01622<br>7-13 | SEPT12       | 124404 | NM_144605 | 1423655<br>11 | CCCAGAUGUGCUUUGA<br>CGA |
| Plate 1 | C07 | E-01622<br>7-00 | A-01622<br>7-14 | SEPT12       | 124404 | NM_144605 | 1423655<br>11 | GCUACAUCAACGAGCA<br>AUA |
| Plate 1 | C07 | E-01622<br>7-00 | A-01622<br>7-15 | SEPT12       | 124404 | NM_144605 | 1423655<br>11 | UCAACACACACCUAUG<br>UAC |
| Plate 1 | C07 | E-01622<br>7-00 | A-01622<br>7-16 | SEPT12       | 124404 | NM_144605 | 1423655<br>11 | UUCUGAUGAUGAGUU<br>CUGA |
| Plate 1 | C08 | E-03204<br>7-00 | A-03204<br>7-13 | SEPT14       | 346288 | NM_207366 | 4640936<br>3  | GGGGUAUAUGCCAAA<br>GUUA |
| Plate 1 | C08 | E-03204<br>7-00 | A-03204<br>7-14 | SEPT14       | 346288 | NM_207366 | 4640936<br>3  | UCGUUAAGCUCCGAGA<br>UAU |
| Plate 1 | C08 | E-03204<br>7-00 | A-03204<br>7-15 | SEPT14       | 346288 | NM_207366 | 4640936<br>3  | CUCAGCACUAUGAAUG<br>UUA |
| Plate 1 | C08 | E-03204<br>7-00 | A-03204<br>7-16 | SEPT14       | 346288 | NM_207366 | 4640936<br>3  | CUUUUAUCUUUAGUU<br>GAUU |
| Plate 1 | C09 | E-01221<br>5-00 | A-01221<br>5-13 | CDC42E<br>P2 | 10435  | NM_006779 | 3008996<br>3  | CCAUCGCUUCCUCUG<br>AUA  |
| Plate 1 | C09 | E-01221<br>5-00 | A-01221<br>5-14 | CDC42E<br>P2 | 10435  | NM_006779 | 3008996<br>3  | GUGUGGACAUCUGGA<br>GGAU |

|         |     |             |             |           |       |           |          |                      |
|---------|-----|-------------|-------------|-----------|-------|-----------|----------|----------------------|
| Plate 1 | C09 | E-012215-00 | A-012215-15 | CDC42E P2 | 10435 | NM_006779 | 30089963 | CACCCAAGAAUAAAAGAAU  |
| Plate 1 | C09 | E-012215-00 | A-012215-16 | CDC42E P2 | 10435 | NM_006779 | 30089963 | GGUGAAGGCUUUGCUGAAA  |
| Plate 1 | C10 | E-017358-00 | A-017358-13 | CDC42E P3 | 10602 | NM_006449 | 30089964 | CAUUUGAACUUUAUGGGUU  |
| Plate 1 | C10 | E-017358-00 | A-017358-14 | CDC42E P3 | 10602 | NM_006449 | 30089964 | GUGCUGAAUGUAAUGGAUA  |
| Plate 1 | C10 | E-017358-00 | A-017358-15 | CDC42E P3 | 10602 | NM_006449 | 30089964 | CCAGUGACAUUUAUUCCA   |
| Plate 1 | C10 | E-017358-00 | A-017358-16 | CDC42E P3 | 10602 | NM_006449 | 30089964 | GCAGAGUCUACAUUUUAUA  |
| Plate 1 | C11 | E-013494-00 | A-013494-13 | CDC42E P4 | 23580 | NM_012121 | 48375181 | GGCCAGUGCAGAAUAUUUU  |
| Plate 1 | C11 | E-013494-00 | A-013494-14 | CDC42E P4 | 23580 | NM_012121 | 48375181 | CCCUGGACCUUGUAGAUAGA |
| Plate 1 | C11 | E-013494-00 | A-013494-15 | CDC42E P4 | 23580 | NM_012121 | 48375181 | UUCCCAACUUUAUUUAGAA  |
| Plate 1 | C11 | E-013494-00 | A-013494-16 | CDC42E P4 | 23580 | NM_012121 | 48375181 | UCUUUAUUUAUUGUGUUUAA |
| Plate 1 | C12 | E-017551-00 | A-017551-13 | CDC42E P1 | 11135 | NM_007061 | 34452716 | GUGUCCAGUUCACAGGGAA  |
| Plate 1 | C12 | E-017551-00 | A-017551-14 | CDC42E P1 | 11135 | NM_007061 | 34452716 | UGAUGAGGUCAAGGUGUGA  |



|         |         |                     |                     |              |       |           |              |                          |
|---------|---------|---------------------|---------------------|--------------|-------|-----------|--------------|--------------------------|
| Plate 1 | C1<br>2 | E-<br>01755<br>1-00 | A-<br>01755<br>1-15 | CDC42E<br>P1 | 11135 | NM_007061 | 3445271<br>6 | GCUCUGACUCUCUCUU<br>GUC  |
| Plate 1 | C1<br>2 | E-<br>01755<br>1-00 | A-<br>01755<br>1-16 | CDC42E<br>P1 | 11135 | NM_007061 | 3445271<br>6 | CUCUGGACC UAAUAGC<br>UGU |
| Plate 1 | D0<br>1 | E-<br>01499<br>3-00 | A-<br>01499<br>3-13 | LRCH3        | 84859 | NM_032773 | 3972565<br>9 | CCUACAAGCUCUAACA<br>UUC  |
| Plate 1 | D0<br>1 | E-<br>01499<br>3-00 | A-<br>01499<br>3-14 | LRCH3        | 84859 | NM_032773 | 3972565<br>9 | CUAGUAAUAACAAA<br>UGGU   |
| Plate 1 | D0<br>1 | E-<br>01499<br>3-00 | A-<br>01499<br>3-15 | LRCH3        | 84859 | NM_032773 | 3972565<br>9 | CCAGUAGCCAUUAGGG<br>AGU  |
| Plate 1 | D0<br>1 | E-<br>01499<br>3-00 | A-<br>01499<br>3-16 | LRCH3        | 84859 | NM_032773 | 3972565<br>9 | GAUUCAGGCUUCAAU<br>AGUG  |
| Plate 1 | D0<br>2 | E-<br>03172<br>5-00 | A-<br>03172<br>5-13 | DOCK7        | 85440 | NM_033407 | 5411242<br>8 | GCAUCAAUUAUAAA<br>CGAC   |
| Plate 1 | D0<br>2 | E-<br>03172<br>5-00 | A-<br>03172<br>5-14 | DOCK7        | 85440 | NM_033407 | 5411242<br>8 | GGAUUUUCUACGAAU<br>GUAC  |
| Plate 1 | D0<br>2 | E-<br>03172<br>5-00 | A-<br>03172<br>5-15 | DOCK7        | 85440 | NM_033407 | 5411242<br>8 | GCAGUGUGCUGAUUU<br>AUGC  |
| Plate 1 | D0<br>2 | E-<br>03172<br>5-00 | A-<br>03172<br>5-16 | DOCK7        | 85440 | NM_033407 | 5411242<br>8 | GGCACAUCUCAGAAU<br>UUA   |
| Plate 1 | D0<br>3 | E-<br>01270<br>7-00 | A-<br>01270<br>7-13 | CFL1         | 1072  | NM_005507 | 4947282<br>3 | GGAUCAAGCAUGAAU<br>UGCA  |
| Plate 1 | D0<br>3 | E-<br>01270<br>7-00 | A-<br>01270<br>7-14 | CFL1         | 1072  | NM_005507 | 4947282<br>3 | CUGUUUAGUUCUGUG<br>UAUA  |

|         |     |             |             |       |      |           |           |                     |
|---------|-----|-------------|-------------|-------|------|-----------|-----------|---------------------|
| Plate 1 | D03 | E-012707-00 | A-012707-15 | CFL1  | 1072 | NM_005507 | 49472823  | CUUCUAACCGCAAUAGUGA |
| Plate 1 | D03 | E-012707-00 | A-012707-16 | CFL1  | 1072 | NM_005507 | 49472823  | CCUCUAUGAUGCAACCUAU |
| Plate 1 | D04 | E-019078-00 | A-019078-13 | CFL2  | 1073 | NM_138638 | 33946277  | CUGUGAUACUUUGAUUUGC |
| Plate 1 | D04 | E-019078-00 | A-019078-14 | CFL2  | 1073 | NM_138638 | 33946277  | CUGUGAGGCUUGAGCAUUC |
| Plate 1 | D04 | E-019078-00 | A-019078-15 | CFL2  | 1073 | NM_138638 | 33946277  | UUCCUAUGUGUUAUAUGA  |
| Plate 1 | D04 | E-019078-00 | A-019078-16 | CFL2  | 1073 | NM_138638 | 33946277  | CCAUUAGACUGUUGAUAC  |
| Plate 1 | D05 | E-007775-00 | A-007775-14 | GSN   | 2934 | NM_198252 | 89276752  | GUUUUGUGAUCGAAGAGGU |
| Plate 1 | D05 | E-007775-00 | A-007775-15 | GSN   | 2934 | NM_198252 | 89276752  | GUUCCAACAGCAAUCGGUA |
| Plate 1 | D05 | E-007775-00 | A-007775-16 | GSN   | 2934 | NM_198252 | 89276752  | GCCUGCUCCAACAAGAUUG |
| Plate 1 | D05 | E-007775-00 | A-007775-17 | GSN   | 2934 | NM_198252 | 89276752  | CCAACCUUUAUGGAGACUU |
| Plate 1 | D06 | E-003536-00 | A-003536-14 | ROCK1 | 6093 | NM_005406 | 112382209 | GUAUUGGACAUAGAUAAAC |
| Plate 1 | D06 | E-003536-00 | A-003536-15 | ROCK1 | 6093 | NM_005406 | 112382209 | CUCGGAUUCUACAAGUGUU |

|         |     |             |             |       |       |           |           |                      |
|---------|-----|-------------|-------------|-------|-------|-----------|-----------|----------------------|
| Plate 1 | D06 | E-003536-00 | A-003536-16 | ROCK1 | 6093  | NM_005406 | 112382209 | CUAGUAAUUUGAUGACUU   |
| Plate 1 | D06 | E-003536-00 | A-003536-17 | ROCK1 | 6093  | NM_005406 | 112382209 | CUACAAACUAAAUCAUUA   |
| Plate 1 | D07 | E-004610-00 | A-004610-14 | ROCK2 | 9475  | NM_004850 | 41872582  | CUUUCAAGAUGAUAGGUAU  |
| Plate 1 | D07 | E-004610-00 | A-004610-15 | ROCK2 | 9475  | NM_004850 | 41872582  | CUUGUAAACCUUAUGAGUA  |
| Plate 1 | D07 | E-004610-00 | A-004610-16 | ROCK2 | 9475  | NM_004850 | 41872582  | UCCUAAUGCUUCAUGAUG   |
| Plate 1 | D07 | E-004610-00 | A-004610-17 | ROCK2 | 9475  | NM_004850 | 41872582  | CAGUCAUUAUUCAAGGUGA  |
| Plate 1 | D08 | E-012076-00 | A-012076-13 | ACTR2 | 10097 | NM_005722 | 53692185  | GUAUCAUUCUUGCAAUUA   |
| Plate 1 | D08 | E-012076-00 | A-012076-14 | ACTR2 | 10097 | NM_005722 | 53692185  | GUACCAUACAUGAGUUAUU  |
| Plate 1 | D08 | E-012076-00 | A-012076-15 | ACTR2 | 10097 | NM_005722 | 53692185  | CCUUGAAUGUAGAAUUUGU  |
| Plate 1 | D08 | E-012076-00 | A-012076-16 | ACTR2 | 10097 | NM_005722 | 53692185  | UCCAGAAGCAUUAAGGUAA  |
| Plate 1 | D09 | E-012077-00 | A-012077-14 | ACTR3 | 10096 | NM_005721 | 34452698  | GCGAU AUGCAGUUUGGUUU |
| Plate 1 | D09 | E-012077-00 | A-012077-15 | ACTR3 | 10096 | NM_005721 | 34452698  | GACUGAACCUCCAUGAAU   |

|         |     |             |             |        |       |           |          |                         |
|---------|-----|-------------|-------------|--------|-------|-----------|----------|-------------------------|
| Plate 1 | D09 | E-012077-00 | A-012077-16 | ACTR3  | 10096 | NM_005721 | 34452698 | CUAUCGAUGUUGGUU<br>AUGA |
| Plate 1 | D09 | E-012077-00 | A-012077-17 | ACTR3  | 10096 | NM_005721 | 34452698 | GGGUCAAAAUGGAUU<br>AAAC |
| Plate 1 | D10 | E-012082-00 | A-012082-14 | ARPC1B | 10095 | NM_005720 | 22907055 | GUGUGAUCUCCAUCUG<br>UUA |
| Plate 1 | D10 | E-012082-00 | A-012082-15 | ARPC1B | 10095 | NM_005720 | 22907055 | UUGCUUUGCUGAAUG<br>UUUC |
| Plate 1 | D10 | E-012082-00 | A-012082-16 | ARPC1B | 10095 | NM_005720 | 22907055 | GUCGGAUCUUUCAGC<br>CUA  |
| Plate 1 | D10 | E-012082-00 | A-012082-17 | ARPC1B | 10095 | NM_005720 | 22907055 | CUCUGAAACACUACCA<br>CUG |
| Plate 1 | D11 | E-012263-00 | A-012263-13 | ARPC1A | 10552 | NM_006409 | 22907051 | CCUUCGUCUCCAAGUU<br>AGA |
| Plate 1 | D11 | E-012263-00 | A-012263-14 | ARPC1A | 10552 | NM_006409 | 22907051 | GUGUGUUUUUGUUUG<br>AAUA |
| Plate 1 | D11 | E-012263-00 | A-012263-15 | ARPC1A | 10552 | NM_006409 | 22907051 | GACUCAUUUCUGUUU<br>GUUA |
| Plate 1 | D11 | E-012263-00 | A-012263-16 | ARPC1A | 10552 | NM_006409 | 22907051 | CCCUAGAGAACAAAUU<br>UGC |
| Plate 1 | D12 | E-012081-00 | A-012081-13 | ARPC2  | 10109 | NM_005731 | 23238209 | CAGUUAUCCAUAUA<br>GGGA  |
| Plate 1 | D12 | E-012081-00 | A-012081-14 | ARPC2  | 10109 | NM_005731 | 23238209 | CCGCUAAUCUUGGGAA<br>UAA |

|         |     |             |             |       |       |              |          |                          |
|---------|-----|-------------|-------------|-------|-------|--------------|----------|--------------------------|
| Plate 1 | D12 | E-012081-00 | A-012081-15 | ARPC2 | 10109 | NM_005731    | 23238209 | GUAAUGAGUUGCAGG<br>AUAA  |
| Plate 1 | D12 | E-012081-00 | A-012081-16 | ARPC2 | 10109 | NM_005731    | 23238209 | GCAUCAAGCUGGCAUG<br>UUG  |
| Plate 1 | E01 | E-005284-00 | A-005284-13 | ARPC3 | 10094 | NM_005719    | 23397667 | CUUUUGCCUUUAUUUC<br>GUA  |
| Plate 1 | E01 | E-005284-00 | A-005284-14 | ARPC3 | 10094 | NM_005719    | 23397667 | CUAUGAAAUAAGAA<br>UGAA   |
| Plate 1 | E01 | E-005284-00 | A-005284-15 | ARPC3 | 10094 | NM_005719    | 23397667 | GUUUUAUACAGAAGA<br>GAGA  |
| Plate 1 | E01 | E-005284-00 | A-005284-16 | ARPC3 | 10094 | NM_005719    | 23397667 | GUUUUCCACUUAACGC<br>AAU  |
| Plate 1 | E02 | E-008571-00 | A-008571-13 | ARPC4 | 10093 | NM_001024960 | 68161510 | UGAUUAUACGUUAUU<br>GGUU  |
| Plate 1 | E02 | E-008571-00 | A-008571-14 | ARPC4 | 10093 | NM_001024960 | 68161510 | GCAUUGUGGCUGAAG<br>AGUU  |
| Plate 1 | E02 | E-008571-00 | A-008571-15 | ARPC4 | 10093 | NM_001024960 | 68161510 | GUAGGAUACUGUAAC<br>CUUU  |
| Plate 1 | E02 | E-008571-00 | A-008571-16 | ARPC4 | 10093 | NM_001024960 | 68161510 | GUUUCAGACUCCAGUU<br>UCU  |
| Plate 1 | E03 | E-012080-00 | A-012080-13 | ARPC5 | 10092 | NM_005717    | 23238212 | GGAGUAGGGUCCA<br>GUUC    |
| Plate 1 | E03 | E-012080-00 | A-012080-14 | ARPC5 | 10092 | NM_005717    | 23238212 | CCAUA AAAUAUCAGA<br>GCUU |

|         |     |             |             |        |           |           |           |                      |
|---------|-----|-------------|-------------|--------|-----------|-----------|-----------|----------------------|
| Plate 1 | E03 | E-012080-00 | A-012080-15 | ARPC5  | 10092     | NM_005717 | 23238212  | GCCUUAGACAUUAUGAGGU  |
| Plate 1 | E03 | E-012080-00 | A-012080-16 | ARPC5  | 10092     | NM_005717 | 23238212  | GCAUUGUCUUGAAGGUGCU  |
| Plate 1 | E04 | E-014690-00 | A-014690-13 | ARPC5L | 81873     | NM_030978 | 13569955  | GGACUAGGCUCCAUAUAA   |
| Plate 1 | E04 | E-014690-00 | A-014690-14 | ARPC5L | 81873     | NM_030978 | 13569955  | GCGUUGACUUGUUA AUGAA |
| Plate 1 | E04 | E-014690-00 | A-014690-15 | ARPC5L | 81873     | NM_030978 | 13569955  | CUCUUGGCUUAUUAGUCUA  |
| Plate 1 | E04 | E-014690-00 | A-014690-16 | ARPC5L | 81873     | NM_030978 | 13569955  | CUCUUGGGCUCAUUGUAAA  |
| Plate 1 | E05 | E-190043-00 | A-190043-09 | WASH1  | 100287171 | NM_182905 | 261337182 | CUGUGUUCUUAAGAGGCUU  |
| Plate 1 | E05 | E-190043-00 | A-190043-10 | WASH1  | 100287171 | NM_182905 | 261337182 | CCUACAAGAUGGGGUACUA  |
| Plate 1 | E05 | E-190043-00 | A-190043-11 | WASH1  | 100287171 | NM_182905 | 261337182 | ACCUCAUGUACAGUGCCGA  |
| Plate 1 | E05 | E-190043-00 | A-190043-12 | WASH1  | 100287171 | NM_182905 | 261337182 | GGCACACCAAUCAUA AAG  |
| Plate 1 | E06 | E-026372-00 | A-026372-09 | FAM21B | 55747     | XM_290482 | 113421477 | GCAUUCUGAUUUUAUUUCU  |
| Plate 1 | E06 | E-026372-00 | A-026372-10 | FAM21B | 55747     | XM_290482 | 113421477 | GGCUUAUUUUCAGAU GAGG |

|         |     |             |             |          |        |           |           |                     |
|---------|-----|-------------|-------------|----------|--------|-----------|-----------|---------------------|
| Plate 1 | E06 | E-026372-00 | A-026372-11 | FAM21B   | 55747  | XM_290482 | 113421477 | UUCUUAGCUUGUUUGAUGA |
| Plate 1 | E06 | E-026372-00 | A-026372-12 | FAM21B   | 55747  | XM_290482 | 113421477 | CCUUUGAGCAACUUGAUU  |
| Plate 1 | E07 | E-029678-00 | A-029678-13 | FAM21C   | 253725 | NM_015262 | 59814410  | GCAUUCUGAUUUUAUUUCU |
| Plate 1 | E07 | E-029678-00 | A-029678-14 | FAM21C   | 253725 | NM_015262 | 59814410  | GGCUUAUUUCAGAUAGG   |
| Plate 1 | E07 | E-029678-00 | A-029678-15 | FAM21C   | 253725 | NM_015262 | 59814410  | UUCUUAGCUUGUUUGAUGA |
| Plate 1 | E07 | E-029678-00 | A-029678-16 | FAM21C   | 253725 | NM_015262 | 59814410  | CCUUUGAGCAACUUGAUU  |
| Plate 1 | E08 | E-020900-00 | A-020900-13 | CCDC53   | 51019  | NM_016053 | 134254436 | GUAUCUCCUUUAAAUGUCA |
| Plate 1 | E08 | E-020900-00 | A-020900-14 | CCDC53   | 51019  | NM_016053 | 134254436 | CUCUCAUAUUUUAGAUGC  |
| Plate 1 | E08 | E-020900-00 | A-020900-15 | CCDC53   | 51019  | NM_016053 | 134254436 | GCAAUAAGAAACAAAUGA  |
| Plate 1 | E08 | E-020900-00 | A-020900-16 | CCDC53   | 51019  | NM_016053 | 134254436 | CAGUAUCUCAAAAUGGUU  |
| Plate 1 | E09 | E-026919-00 | A-026919-13 | KIAA1033 | 23325  | NM_015275 | 40018628  | CUUGUAUGCAUAUAGUAUU |
| Plate 1 | E09 | E-026919-00 | A-026919-14 | KIAA1033 | 23325  | NM_015275 | 40018628  | GGGCUAUGUACGAAUGAUA |

|         |     |             |             |          |       |              |           |                     |
|---------|-----|-------------|-------------|----------|-------|--------------|-----------|---------------------|
| Plate 1 | E09 | E-026919-00 | A-026919-15 | KIAA1033 | 23325 | NM_015275    | 40018628  | CCAGAUUGAUUAAAGAUAU |
| Plate 1 | E09 | E-026919-00 | A-026919-16 | KIAA1033 | 23325 | NM_015275    | 40018628  | CUCCGAAAUUCUAUAUAA  |
| Plate 1 | E10 | E-021222-00 | A-021222-13 | KIAA0196 | 9897  | NM_014846    | 120952850 | GGAUGAGUCUGUAACGUUU |
| Plate 1 | E10 | E-021222-00 | A-021222-14 | KIAA0196 | 9897  | NM_014846    | 120952850 | GUACUAUUCUGGAGAGUUG |
| Plate 1 | E10 | E-021222-00 | A-021222-15 | KIAA0196 | 9897  | NM_014846    | 120952850 | UGCCGAUACUCGAAAGUUU |
| Plate 1 | E10 | E-021222-00 | A-021222-16 | KIAA0196 | 9897  | NM_014846    | 120952850 | CGACUGAGAUCUGAUGAUA |
| Plate 1 | E11 | E-011557-00 | A-011557-13 | WASF1    | 8936  | NM_001024936 | 68161503  | GUCUGAAGUUUUAUACCAA |
| Plate 1 | E11 | E-011557-00 | A-011557-14 | WASF1    | 8936  | NM_001024936 | 68161503  | UCCCAUGUCCAUAUAUG   |
| Plate 1 | E11 | E-011557-00 | A-011557-15 | WASF1    | 8936  | NM_001024936 | 68161503  | UGAUGAAGUAGAUUGGUUG |
| Plate 1 | E11 | E-011557-00 | A-011557-16 | WASF1    | 8936  | NM_001024936 | 68161503  | CCUCCAUAACUUUUGAUUU |
| Plate 1 | E12 | E-012141-00 | A-012141-13 | WASF2    | 10163 | NM_006990    | 45007036  | CGACCGACUACAGGUUAAA |
| Plate 1 | E12 | E-012141-00 | A-012141-14 | WASF2    | 10163 | NM_006990    | 45007036  | CGAUUAACUCUUUCUGCCU |



|         |     |             |             |       |        |              |           |                     |
|---------|-----|-------------|-------------|-------|--------|--------------|-----------|---------------------|
| Plate 1 | E12 | E-012141-00 | A-012141-15 | WASF2 | 10163  | NM_006990    | 45007036  | CUCCAAGUCAACAUGUAU  |
| Plate 1 | E12 | E-012141-00 | A-012141-16 | WASF2 | 10163  | NM_006990    | 45007036  | CUUUUAUCCAGGAGGCAUC |
| Plate 1 | F01 | E-012301-00 | A-012301-14 | WASF3 | 10810  | NM_006646    | 62865897  | GCUUUGAUUAUAGAUACGA |
| Plate 1 | F01 | E-012301-00 | A-012301-15 | WASF3 | 10810  | NM_006646    | 62865897  | GGCUGAAGUUCUAUACUGA |
| Plate 1 | F01 | E-012301-00 | A-012301-16 | WASF3 | 10810  | NM_006646    | 62865897  | CAGCGAACUUGAAUGUGUA |
| Plate 1 | F01 | E-012301-00 | A-012301-17 | WASF3 | 10810  | NM_006646    | 62865897  | CCACUUGGUCAGAAUUUA  |
| Plate 1 | F02 | E-022415-00 | A-022415-09 | WHAMM | 123720 | NM_001080435 | 122937270 | GGCUGAUCUAGAAUUGUUC |
| Plate 1 | F02 | E-022415-00 | A-022415-10 | WHAMM | 123720 | NM_001080435 | 122937270 | CGGGUGGGCUGAAAGUUUU |
| Plate 1 | F02 | E-022415-00 | A-022415-11 | WHAMM | 123720 | NM_001080435 | 122937270 | GCAUAUGGAAUAAUGAUUU |
| Plate 1 | F02 | E-022415-00 | A-022415-12 | WHAMM | 123720 | NM_001080435 | 122937270 | GGCUUGAAUGUGAAUGUUA |
| Plate 1 | F03 | E-016922-00 | A-016922-13 | JMY   | 133746 | NM_152405    | 94721314  | UCUGGGACCUCGAAGAAU  |
| Plate 1 | F03 | E-016922-00 | A-016922-14 | JMY   | 133746 | NM_152405    | 94721314  | UUUCCAUGGAGAAUGAUUA |

|         |     |                 |                 |       |        |                  |               |                         |
|---------|-----|-----------------|-----------------|-------|--------|------------------|---------------|-------------------------|
| Plate 1 | F03 | E-01692<br>2-00 | A-01692<br>2-15 | JMY   | 133746 | NM_152405        | 9472131<br>4  | CCUUGAAGCGUGGUA<br>GUUU |
| Plate 1 | F03 | E-01692<br>2-00 | A-01692<br>2-16 | JMY   | 133746 | NM_152405        | 9472131<br>4  | GGAUUGAAGAUGAAU<br>AUAG |
| Plate 1 | F04 | E-01097<br>5-00 | A-01097<br>5-13 | WIPF1 | 7456   | NM_003387        | 1162843<br>99 | CCACCAUCAACAUCUA<br>UUA |
| Plate 1 | F04 | E-01097<br>5-00 | A-01097<br>5-14 | WIPF1 | 7456   | NM_003387        | 1162843<br>99 | CCAAAGUCCUGAUUUA<br>GUA |
| Plate 1 | F04 | E-01097<br>5-00 | A-01097<br>5-15 | WIPF1 | 7456   | NM_003387        | 1162843<br>99 | GCAUCAUUUGUCUAG<br>GAUC |
| Plate 1 | F04 | E-01097<br>5-00 | A-01097<br>5-16 | WIPF1 | 7456   | NM_003387        | 1162843<br>99 | GUACCAAGGUCAGAA<br>AUUG |
| Plate 1 | F05 | E-00635<br>4-00 | A-00635<br>4-14 | NCK1  | 4690   | NM_006153        | 3351948<br>2  | CCCUUUGCUUCUAAUA<br>UUA |
| Plate 1 | F05 | E-00635<br>4-00 | A-00635<br>4-15 | NCK1  | 4690   | NM_006153        | 3351948<br>2  | CAGUCGUGCUUGAUU<br>GGAA |
| Plate 1 | F05 | E-00635<br>4-00 | A-00635<br>4-16 | NCK1  | 4690   | NM_006153        | 3351948<br>2  | GCAGGAAGAUCAAUG<br>GUAU |
| Plate 1 | F05 | E-00635<br>4-00 | A-00635<br>4-17 | NCK1  | 4690   | NM_006153        | 3351948<br>2  | CCAUUAACUUCAGGUU<br>UGG |
| Plate 1 | F06 | E-01954<br>7-00 | A-01954<br>7-13 | NCK2  | 8440   | NM_001004<br>722 | 5263042<br>6  | CCUUCGGCUUGUUUGA<br>AUC |
| Plate 1 | F06 | E-01954<br>7-00 | A-01954<br>7-14 | NCK2  | 8440   | NM_001004<br>722 | 5263042<br>6  | UCUUUAUGUUCAGGU<br>CGCU |

|         |     |             |             |        |       |              |          |                        |
|---------|-----|-------------|-------------|--------|-------|--------------|----------|------------------------|
| Plate 1 | F06 | E-019547-00 | A-019547-15 | NCK2   | 8440  | NM_001004722 | 52630426 | GUUUAAAUAUAACGUCUUG    |
| Plate 1 | F06 | E-019547-00 | A-019547-16 | NCK2   | 8440  | NM_001004722 | 52630426 | CCUUAAAGCGUCAGGGAAG    |
| Plate 1 | F07 | E-007290-00 | A-007290-13 | ABI1   | 10006 | NM_001012751 | 61743945 | GUAUAAUAUUUAACGAAUC    |
| Plate 1 | F07 | E-007290-00 | A-007290-14 | ABI1   | 10006 | NM_001012751 | 61743945 | CAAUCAUGCACUAUACUGA    |
| Plate 1 | F07 | E-007290-00 | A-007290-15 | ABI1   | 10006 | NM_001012751 | 61743945 | GUCUUAACGUGAAUUGAGU    |
| Plate 1 | F07 | E-007290-00 | A-007290-16 | ABI1   | 10006 | NM_001012751 | 61743945 | GGGUCAUGUAUUAAUCAGU    |
| Plate 1 | F08 | E-017711-00 | A-017711-13 | BRK1   | 55845 | NM_018462    | 54262137 | GGAGUACAUUGAGAUAAUC    |
| Plate 1 | F08 | E-017711-00 | A-017711-14 | BRK1   | 55845 | NM_018462    | 54262137 | UUAUUGCACAGAAUUGUAA    |
| Plate 1 | F08 | E-017711-00 | A-017711-15 | BRK1   | 55845 | NM_018462    | 54262137 | UCAGUAACAUUUUAUACAUCAU |
| Plate 1 | F08 | E-017711-00 | A-017711-16 | BRK1   | 55845 | NM_018462    | 54262137 | GUAUUUACUAUGUAGGCAUCAU |
| Plate 1 | F09 | E-010640-00 | A-010640-13 | NCKAP1 | 10787 | NM_013436    | 45505152 | GUAUAAAGCCUAGCGAUAA    |
| Plate 1 | F09 | E-010640-00 | A-010640-14 | NCKAP1 | 10787 | NM_013436    | 45505152 | UGAUCAACCGGAUUGCUA     |

|         |     |             |             |        |       |           |           |                     |
|---------|-----|-------------|-------------|--------|-------|-----------|-----------|---------------------|
| Plate 1 | F09 | E-010640-00 | A-010640-15 | NCKAP1 | 10787 | NM_013436 | 45505152  | GGAGAAUGUUGAUGUGUA  |
| Plate 1 | F09 | E-010640-00 | A-010640-16 | NCKAP1 | 10787 | NM_013436 | 45505152  | GAUUGAUUUACAAGAGUA  |
| Plate 1 | F10 | E-010508-00 | A-010508-13 | CTTN   | 2017  | NM_138565 | 20357555  | CCGUUGGCUUUGAGUAUCA |
| Plate 1 | F10 | E-010508-00 | A-010508-14 | CTTN   | 2017  | NM_138565 | 20357555  | CUCGCAUUCUCUUGUGUUC |
| Plate 1 | F10 | E-010508-00 | A-010508-15 | CTTN   | 2017  | NM_138565 | 20357555  | GUUUUAUGCAUUGAUGGUU |
| Plate 1 | F10 | E-010508-00 | A-010508-16 | CTTN   | 2017  | NM_138565 | 20357555  | UGUUCAAUUUCAGUAGUUU |
| Plate 1 | F11 | E-005163-01 | A-005163-14 | PXN    | 5829  | NM_002859 | 344217708 | GUGGCAUCCUGAGUGCUUU |
| Plate 1 | F11 | E-005163-01 | A-005163-15 | PXN    | 5829  | NM_002859 | 344217708 | CUGUCGGAUUUCAAGUUCA |
| Plate 1 | F11 | E-005163-01 | A-005163-16 | PXN    | 5829  | NM_002859 | 344217708 | CCAACAAGCAGAAAUCAGC |
| Plate 1 | F11 | E-005163-01 | A-005163-17 | PXN    | 5829  | NM_002859 | 344217708 | UCUUUGUUCUGUGAUUAUU |
| Plate 1 | F12 | E-012382-00 | A-012382-13 | UTRN   | 7402  | NM_007124 | 110611227 | GGAUGAUGUUGAAUUAUCG |
| Plate 1 | F12 | E-012382-00 | A-012382-14 | UTRN   | 7402  | NM_007124 | 110611227 | GCUCGAUUUCAAAGAGUG  |

|         |     |                 |                 |        |       |                  |               |                          |
|---------|-----|-----------------|-----------------|--------|-------|------------------|---------------|--------------------------|
| Plate 1 | F12 | E-01238<br>2-00 | A-01238<br>2-15 | UTRN   | 7402  | NM_007124        | 1106112<br>27 | CGUCUGAGCUGAAUG<br>UUGU  |
| Plate 1 | F12 | E-01238<br>2-00 | A-01238<br>2-16 | UTRN   | 7402  | NM_007124        | 1106112<br>27 | GGCUCGACUCUAUAU<br>CUU   |
| Plate 1 | G01 | E-01377<br>2-00 | A-01377<br>2-14 | FBLIM1 | 54751 | NM_001024<br>215 | 6693298<br>5  | GCAUCGUCUGUCUUA<br>UCA   |
| Plate 1 | G01 | E-01377<br>2-00 | A-01377<br>2-15 | FBLIM1 | 54751 | NM_001024<br>215 | 6693298<br>5  | GUACCAUGCCCAGUG<br>C UUC |
| Plate 1 | G01 | E-01377<br>2-00 | A-01377<br>2-16 | FBLIM1 | 54751 | NM_001024<br>215 | 6693298<br>5  | GCAUUGGGGAUGAGA<br>GCUU  |
| Plate 1 | G01 | E-01377<br>2-00 | A-01377<br>2-17 | FBLIM1 | 54751 | NM_001024<br>215 | 6693298<br>5  | CCCUCCUGCUUCACG<br>UGUG  |
| Plate 1 | G02 | E-01257<br>9-00 | A-01257<br>9-13 | FLNA   | 2316  | NM_001456        | 1160635<br>72 | GUGGCAUCCAAGAU<br>UGUG   |
| Plate 1 | G02 | E-01257<br>9-00 | A-01257<br>9-14 | FLNA   | 2316  | NM_001456        | 1160635<br>72 | CCAACAAGGUCAAAG<br>UAUA  |
| Plate 1 | G02 | E-01257<br>9-00 | A-01257<br>9-15 | FLNA   | 2316  | NM_001456        | 1160635<br>72 | UCAUCAAGUACGGUG<br>GUGA  |
| Plate 1 | G02 | E-01257<br>9-00 | A-01257<br>9-16 | FLNA   | 2316  | NM_001456        | 1160635<br>72 | CCAAGAGGAAUAAAG<br>UUUU  |
| Plate 1 | G03 | E-02017<br>5-00 | A-02017<br>5-13 | FLNB   | 2317  | NM_001457        | 1059905<br>13 | CGUUCACAGUCAAUA<br>UGU   |
| Plate 1 | G03 | E-02017<br>5-00 | A-02017<br>5-14 | FLNB   | 2317  | NM_001457        | 1059905<br>13 | CCAUUUACCGUGAAGA<br>UCA  |

|         |     |             |             |        |       |           |           |                      |
|---------|-----|-------------|-------------|--------|-------|-----------|-----------|----------------------|
| Plate 1 | G03 | E-020175-00 | A-020175-15 | FLNB   | 2317  | NM_001457 | 105990513 | GCCUGAGCCCAAUGUGUA   |
| Plate 1 | G03 | E-020175-00 | A-020175-16 | FLNB   | 2317  | NM_001457 | 105990513 | CCAGCAGGAUCAAGUCUU   |
| Plate 1 | G04 | E-011272-00 | A-011272-13 | FLNC   | 2318  | NM_001458 | 116805321 | CUAUUGUCACCAAAGAUGC  |
| Plate 1 | G04 | E-011272-00 | A-011272-14 | FLNC   | 2318  | NM_001458 | 116805321 | GCUACAACCCAGAGUUUU   |
| Plate 1 | G04 | E-011272-00 | A-011272-15 | FLNC   | 2318  | NM_001458 | 116805321 | CUCACAAGCCAAGAUCCGAA |
| Plate 1 | G04 | E-011272-00 | A-011272-16 | FLNC   | 2318  | NM_001458 | 116805321 | UUGAGAACCAUGACGGUAC  |
| Plate 1 | G05 | E-010505-00 | A-010505-13 | CTNNA1 | 1495  | NM_001903 | 55770843  | CUGUAGUGAUUGAUUGAUU  |
| Plate 1 | G05 | E-010505-00 | A-010505-14 | CTNNA1 | 1495  | NM_001903 | 55770843  | GGAGUAUGCCCAAGUUUUC  |
| Plate 1 | G05 | E-010505-00 | A-010505-15 | CTNNA1 | 1495  | NM_001903 | 55770843  | GUUCCAUCUCAAAUAAUGA  |
| Plate 1 | G05 | E-010505-00 | A-010505-16 | CTNNA1 | 1495  | NM_001903 | 55770843  | CCUCUGUCCUCAGGUUAUU  |
| Plate 1 | G06 | E-020718-00 | A-020718-13 | FNBPII | 54874 | NM_017737 | 68348707  | GUUUGAUGAUGAAUUGAG   |
| Plate 1 | G06 | E-020718-00 | A-020718-14 | FNBPII | 54874 | NM_017737 | 68348707  | UGAAUAUGCUGCACA AUUA |

|         |     |             |             |        |       |           |          |                      |
|---------|-----|-------------|-------------|--------|-------|-----------|----------|----------------------|
| Plate 1 | G06 | E-020718-00 | A-020718-15 | FNBP1L | 54874 | NM_017737 | 68348707 | GGUGCAUCUCAAUUUUAU   |
| Plate 1 | G06 | E-020718-00 | A-020718-16 | FNBP1L | 54874 | NM_017737 | 68348707 | CUUGUAAAUAUGAUUGUUG  |
| Plate 1 | G07 | E-012771-00 | A-012771-13 | CORO1A | 11151 | NM_007074 | 68161542 | CUGUCAACCCUAAGUUGU   |
| Plate 1 | G07 | E-012771-00 | A-012771-14 | CORO1A | 11151 | NM_007074 | 68161542 | UGAUCAUGGUGUGGGACGU  |
| Plate 1 | G07 | E-012771-00 | A-012771-15 | CORO1A | 11151 | NM_007074 | 68161542 | GCACUAUCUCUCCAUGUUC  |
| Plate 1 | G07 | E-012771-00 | A-012771-16 | CORO1A | 11151 | NM_007074 | 68161542 | GAUGGAGGCCUCAUUGUA   |
| Plate 1 | G08 | E-003521-00 | A-003521-17 | PAK1   | 5058  | NM_002576 | 42794768 | UGGAUGUGUUGGAGUUUA   |
| Plate 1 | G08 | E-003521-00 | A-003521-18 | PAK1   | 5058  | NM_002576 | 42794768 | GGAGAAAUACGAAGCAUA   |
| Plate 1 | G08 | E-003521-00 | A-003521-19 | PAK1   | 5058  | NM_002576 | 42794768 | GGUUUAUGAUUAAGGGUUU  |
| Plate 1 | G08 | E-003521-00 | A-003521-20 | PAK1   | 5058  | NM_002576 | 42794768 | CUUGGAUCUUCUAAUUGGUC |
| Plate 1 | G09 | E-003597-00 | A-003597-18 | PAK2   | 5062  | NM_002577 | 45827795 | GGAUCAUACGAAAUCAAUU  |
| Plate 1 | G09 | E-003597-00 | A-003597-19 | PAK2   | 5062  | NM_002577 | 45827795 | GCUGUAUGCAGAGAGUGUU  |

|         |     |             |             |      |       |              |           |                      |
|---------|-----|-------------|-------------|------|-------|--------------|-----------|----------------------|
| Plate 1 | G09 | E-003597-00 | A-003597-20 | PAK2 | 5062  | NM_002577    | 45827795  | CUGUUAAGCUCACUGACUU  |
| Plate 1 | G09 | E-003597-00 | A-003597-21 | PAK2 | 5062  | NM_002577    | 45827795  | GUAUCAUGGCUAUUGAGAU  |
| Plate 1 | G10 | E-003614-00 | A-003614-13 | PAK3 | 5063  | NM_002578    | 46249379  | GCAUCAGGUACUGUUUAUA  |
| Plate 1 | G10 | E-003614-00 | A-003614-14 | PAK3 | 5063  | NM_002578    | 46249379  | GGGUGAUGAACUAUGGGUA  |
| Plate 1 | G10 | E-003614-00 | A-003614-15 | PAK3 | 5063  | NM_002578    | 46249379  | GCAUUGUCAUUAGAU GUCC |
| Plate 1 | G10 | E-003614-00 | A-003614-16 | PAK3 | 5063  | NM_002578    | 46249379  | CCUUCAGACUUUGAGCAUA  |
| Plate 1 | G11 | E-003615-00 | A-003615-16 | PAK4 | 10298 | NM_001014834 | 126273532 | CGAGUUAGUUUACA AUUA  |
| Plate 1 | G11 | E-003615-00 | A-003615-17 | PAK4 | 10298 | NM_001014834 | 126273532 | UCGCUGGGGAUAAUGGUGA  |
| Plate 1 | G11 | E-003615-00 | A-003615-18 | PAK4 | 10298 | NM_001014834 | 126273532 | CGAGUAUCCAUGAGCAGU   |
| Plate 1 | G11 | E-003615-00 | A-003615-19 | PAK4 | 10298 | NM_001014834 | 126273532 | UCAUGAAUGUCCGAA GAGU |
| Plate 1 | G12 | E-003973-00 | A-003973-21 | PAK7 | 57144 | NM_177990    | 29826328  | GCAGUAUAAUGUAUUUUGC  |
| Plate 1 | G12 | E-003973-00 | A-003973-22 | PAK7 | 57144 | NM_177990    | 29826328  | GUAUCGUGCUGGAAGUCUG  |



|         |     |             |             |       |       |           |          |                     |
|---------|-----|-------------|-------------|-------|-------|-----------|----------|---------------------|
| Plate 1 | G12 | E-003973-00 | A-003973-23 | PAK7  | 57144 | NM_177990 | 29826328 | UAGUCAUCAUUAGUUUCUA |
| Plate 1 | G12 | E-003973-00 | A-003973-24 | PAK7  | 57144 | NM_177990 | 29826328 | GGAUAAAGUUGUCUGAUUU |
| Plate 1 | H01 | E-004338-00 | A-004338-15 | PAK6  | 56924 | NM_020168 | 21536446 | GUAUUCUCUCCAAAGAUUG |
| Plate 1 | H01 | E-004338-00 | A-004338-16 | PAK6  | 56924 | NM_020168 | 21536446 | GGAUGACCCCUUGAUUUU  |
| Plate 1 | H01 | E-004338-00 | A-004338-17 | PAK6  | 56924 | NM_020168 | 21536446 | GUGUUACCUUCAAGUUUA  |
| Plate 1 | H01 | E-004338-00 | A-004338-18 | PAK6  | 56924 | NM_020168 | 21536446 | GCAUCUUCUCCUAGAAUUU |
| Plate 1 | H02 | E-005265-00 | A-005265-17 | ACTG1 | 71    | NM_001614 | 11038618 | CCUUGAAGCUUGUAUCUGA |
| Plate 1 | H02 | E-005265-00 | A-005265-18 | ACTG1 | 71    | NM_001614 | 11038618 | GUUCAACCUUUAGUACGUG |
| Plate 1 | H02 | E-005265-00 | A-005265-19 | ACTG1 | 71    | NM_001614 | 11038618 | GGCAUGUGCAAAGCUGGUU |
| Plate 1 | H02 | E-005265-00 | A-005265-20 | ACTG1 | 71    | NM_001614 | 11038618 | GGGUUAAUUGAGAAUAGAA |
| Plate 1 | H03 | E-003451-00 | A-003451-19 | ACTB  | 60    | NM_001101 | 5016088  | GCAUGGGUCAGAAGGAUUC |
| Plate 1 | H03 | E-003451-00 | A-003451-20 | ACTB  | 60    | NM_001101 | 5016088  | GUUUUAUUUUGAAUGAUGA |

|         |     |             |             |      |       |              |           |                     |
|---------|-----|-------------|-------------|------|-------|--------------|-----------|---------------------|
| Plate 1 | H03 | E-003451-00 | A-003451-21 | ACTB | 60    | NM_001101    | 5016088   | CUUUCGUGUAAAUAUGUA  |
| Plate 1 | H03 | E-003451-00 | A-003451-22 | ACTB | 60    | NM_001101    | 5016088   | GAUUGCACAUUGUUGUUUU |
| Plate 1 | H04 | E-012066-00 | A-012066-13 | TOM1 | 10043 | NM_005488    | 4885636   | GAAAGAGGUAAAAUACGAA |
| Plate 1 | H04 | E-012066-00 | A-012066-14 | TOM1 | 10043 | NM_005488    | 4885636   | GCGACAUCAUCAACGAGAC |
| Plate 1 | H04 | E-012066-00 | A-012066-15 | TOM1 | 10043 | NM_005488    | 4885636   | GGACCGUGUUCAACUCAGA |
| Plate 1 | H04 | E-012066-00 | A-012066-16 | TOM1 | 10043 | NM_005488    | 4885636   | CUGACGUGGGUAAUGAUGC |
| Plate 1 | H05 | E-008522-01 | A-008522-13 | DAB2 | 1601  | NM_001244871 | 349585059 | CCAUUAGUUGUUGAUCUUA |
| Plate 1 | H05 | E-008522-01 | A-008522-14 | DAB2 | 1601  | NM_001244871 | 349585059 | CUUUGGUCUCAAUCAGUC  |
| Plate 1 | H05 | E-008522-01 | A-008522-16 | DAB2 | 1601  | NM_001244871 | 349585059 | CUCUCUAGCUAAAGUGUAA |
| Plate 1 | H05 | E-008522-01 | A-008522-17 | DAB2 | 1601  | NM_001244871 | 349585059 | GCAUGAACAUCCAGUAAU  |
| Plate 1 | H06 | E-016269-00 | A-016269-13 | OPTN | 10133 | NM_021980    | 56550112  | CCAUGAAGCUAAAUAUCA  |
| Plate 1 | H06 | E-016269-00 | A-016269-14 | OPTN | 10133 | NM_021980    | 56550112  | UGUUUAUAUAUGAUUAAUA |

|         |     |             |             |         |       |           |           |                     |
|---------|-----|-------------|-------------|---------|-------|-----------|-----------|---------------------|
| Plate 1 | H06 | E-016269-00 | A-016269-15 | OPTN    | 10133 | NM_021980 | 56550112  | GCCUUGUUUGUAAGUCUA  |
| Plate 1 | H06 | E-016269-00 | A-016269-16 | OPTN    | 10133 | NM_021980 | 56550112  | CCUUCAUGCUUUCAUUGUA |
| Plate 1 | H07 | E-014361-00 | A-014361-13 | CORO7   | 79585 | NM_024535 | 88702974  | GCAUUGUCUGGGUAUGUGA |
| Plate 1 | H07 | E-014361-00 | A-014361-14 | CORO7   | 79585 | NM_024535 | 88702974  | CCCGUGUAUCCUGUACGA  |
| Plate 1 | H07 | E-014361-00 | A-014361-15 | CORO7   | 79585 | NM_024535 | 88702974  | CCAGCUGCUCCUAUAUGAA |
| Plate 1 | H07 | E-014361-00 | A-014361-16 | CORO7   | 79585 | NM_024535 | 88702974  | UCCUGGAUCAGUGACAUUC |
| Plate 1 | H08 | E-017739-00 | A-017739-13 | HCLS1   | 3059  | NM_005335 | 37059786  | GUUCAGUCCUAAAAUUCGA |
| Plate 1 | H08 | E-017739-00 | A-017739-14 | HCLS1   | 3059  | NM_005335 | 37059786  | CGUCUAGAUUGUGUGUGUU |
| Plate 1 | H08 | E-017739-00 | A-017739-15 | HCLS1   | 3059  | NM_005335 | 37059786  | CAGUCGGCUUUGAUUAUAA |
| Plate 1 | H08 | E-017739-00 | A-017739-16 | HCLS1   | 3059  | NM_005335 | 37059786  | CUGUGGCUCUAUAUGAUUA |
| Plate 1 | H09 | E-024692-00 | A-024692-13 | SHROOM4 | 57477 | NM_020717 | 118600966 | GAUGUAGGUUCAUAUAUG  |
| Plate 1 | H09 | E-024692-00 | A-024692-14 | SHROOM4 | 57477 | NM_020717 | 118600966 | GAUGGAAGUCUAAAGAUUC |

|         |     |                 |                 |                              |       |           |               |                     |
|---------|-----|-----------------|-----------------|------------------------------|-------|-----------|---------------|---------------------|
| Plate 1 | H09 | E-02469<br>2-00 | A-02469<br>2-15 | SHROOM4                      | 57477 | NM_020717 | 1186009<br>66 | CCAAGGCGUUGAAUUGUUC |
| Plate 1 | H09 | E-02469<br>2-00 | A-02469<br>2-16 | SHROOM4                      | 57477 | NM_020717 | 1186009<br>66 | GCUUGGUAGAUAAAGGUGA |
| Plate 1 | H10 | E-00938<br>0-00 | A-00938<br>0-13 | OSBPL3                       | 26031 | NM_145322 | 2173558<br>3  | GCUGAGUCUAGAAAUUUUG |
| Plate 1 | H10 | E-00938<br>0-00 | A-00938<br>0-14 | OSBPL3                       | 26031 | NM_145322 | 2173558<br>3  | CCCUUAUGCUUUUUUUG   |
| Plate 1 | H10 | E-00938<br>0-00 | A-00938<br>0-15 | OSBPL3                       | 26031 | NM_145322 | 2173558<br>3  | CUAUGGAAUAUCAAGUAUA |
| Plate 1 | H10 | E-00938<br>0-00 | A-00938<br>0-16 | OSBPL3                       | 26031 | NM_145322 | 2173558<br>3  | CCUUGAGUCAUAGGUUAUA |
| Plate 1 | H11 | E-00352<br>3-00 | A-00352<br>3-24 | PRKCA                        | 5578  | NM_002737 | 4715731<br>9  | GCAUCAGCCUCUACCGAUU |
| Plate 1 | H11 | E-00352<br>3-00 | A-00352<br>3-25 | PRKCA                        | 5578  | NM_002737 | 4715731<br>9  | GUAGGAAAAUUUAAGGAAC |
| Plate 1 | H11 | E-00352<br>3-00 | A-00352<br>3-26 | PRKCA                        | 5578  | NM_002737 | 4715731<br>9  | GCGUCCUGUUGUAUGAAAU |
| Plate 1 | H11 | E-00352<br>3-00 | A-00352<br>3-27 | PRKCA                        | 5578  | NM_002737 | 4715731<br>9  | GGAUCGAACAACAAGGAU  |
| Plate 1 | H12 | D-00191<br>0-10 | D-00191<br>0-01 | Accell Non-targeting Control | 0     |           | 0             | UGGUUUACAUGUCGACUAA |
| Plate 1 | H12 | D-00191<br>0-10 | D-00191<br>0-02 | Accell Non-targeting Control | 0     |           | 0             | UGGUUUACAUGUUUCUGA  |

|         |         |                 |                 |                                        |   |  |   |                         |
|---------|---------|-----------------|-----------------|----------------------------------------|---|--|---|-------------------------|
| Plate 1 | H1<br>2 | D-00191<br>0-10 | D-00191<br>0-03 | Accell<br>Non-<br>targeting<br>Control | 0 |  | 0 | UGGUUUACAUGUUUU<br>CCUA |
| Plate 1 | H1<br>2 | D-00191<br>0-10 | D-00191<br>0-04 | Accell<br>Non-<br>targeting<br>Control | 0 |  | 0 | UGGUUUACAUGUUGU<br>GUGA |
